# Supplementary material for: Hybrid isoquinolines from Thalictrum foetidum: a new type of aporphine inhibiting Staphylococcus aureus by combined mechanisms
Source: Royal Society of Chemistry journal article supplement (doi:10.1039/c9qo00737g), 2019-01-01

# Hybrid Isoquinolines from *Thalictrum foetidum*: A New Type of Aporphine Inhibiting *Staphylococcus aureus* by combined mechanisms

Cai-Feng Ding,<sup>a,e,l</sup> Rong-Ping Zhang,<sup>d,l</sup> Hao-Fei Yu,<sup>b,d</sup> Jing Yang,<sup>a</sup> Xu-Jie Qin,<sup>a</sup> Zhi Dai,<sup>a</sup> Ya-Ping Liu,<sup>a</sup> Qiu-Min Lu,<sup>c</sup> Ren Lai,<sup>\*,c</sup> and Xiao-Dong Luo<sup>\*,a,b</sup>

<sup>a</sup> State Key Laboratory of Phytochemistry and Plant Resources in West China, Kunming Institute of Botany, Chinese Academy of Sciences, Kunming, 650201, People's Republic of China

<sup>b</sup> Key Laboratory of Medicinal Chemistry for Natural Resource, Ministry of Education and Yunnan Province, School of Chemical Science and Technology, Yunnan University, Kunming 650091, People's Republic of China

<sup>c</sup> Key Laboratory of Animal Models and Human Disease Mechanisms of Chinese Academy of Sciences & Yunnan Province, Kunming Institute of Zoology, Kunming 650223, People's Republic of China

<sup>d</sup> School of Pharmaceutical Sciences and Yunnan Key Laboratory of Pharmacology for Natural Products, Kunming Medical University, Kunming 650500, People's Republic of China

<sup>e</sup> Graduate University of the Chinese Academy of Sciences, Beijing 100049, People's Republic of China

---

**\*To whom correspondence should be addressed:**

E-mail: xdluo@mail.kib.ac.cn;

rlai@mail.kiz.ac.cn;

## Author Contributions

<sup>l</sup>These authors contributed equally to this work

## Contents of Supporting Information

|                                                                                                                                |    |
|--------------------------------------------------------------------------------------------------------------------------------|----|
| <b>Figure S1.</b> Experimental ECD curves of compounds <b>1</b> and <b>2</b> .....                                             | 4  |
| <b>Table S1.</b> The computed $^{13}\text{C}$ NMR data for <b>1</b> .....                                                      | 4  |
| <b>1. Experimental section</b> .....                                                                                           | 5  |
| <b>2. Antibacterial Assays</b> .....                                                                                           | 20 |
| <b>3. Cytotoxic Assays</b> .....                                                                                               | 20 |
| <b>4. Antibacterial Kinetics Experiment</b> .....                                                                              | 21 |
| <b>5. Scanning Electron Microscopy (SEM)</b> .....                                                                             | 21 |
| <b>6. SYTOX Green Assays</b> .....                                                                                             | 22 |
| <b>7. DAPI Staining Assays</b> .....                                                                                           | 22 |
| <b>Figure S2.</b> HREIMS spectrum of thalfoetine A ( <b>1</b> ).....                                                           | 24 |
| <b>Figure S3.</b> IR spectrum of thalfoetine A ( <b>1</b> ).....                                                               | 25 |
| <b>Figure S4.</b> UV spectrum of thalfoetine A ( <b>1</b> ).....                                                               | 26 |
| <b>Figure S5.</b> $^1\text{H}$ NMR spectrum of thalfoetine A ( <b>1</b> ) in $\text{CDCl}_3$ (600 MHz).....                    | 27 |
| <b>Figure S6.</b> $^{13}\text{C}$ NMR spectrum of thalfoetine A ( <b>1</b> ) in $\text{CDCl}_3$ (150 MHz).....                 | 28 |
| <b>Figure S7.</b> HSQC spectrum of thalfoetine A ( <b>1</b> ) in $\text{CDCl}_3$ (600 MHz).....                                | 31 |
| <b>Figure S8.</b> HMBC spectrum of thalfoetine A ( <b>1</b> ) in $\text{CDCl}_3$ (600 MHz).....                                | 32 |
| <b>Figure S9.</b> $^1\text{H}$ - $^1\text{H}$ COSY spectrum of thalfoetine A ( <b>1</b> ) in $\text{CDCl}_3$ (600 MHz).....    | 36 |
| <b>Figure S10.</b> ROESY spectrum of thalfoetine A ( <b>1</b> ) in $\text{CDCl}_3$ (600 MHz).....                              | 37 |
| <b>Figure S11.</b> HREIMS spectrum of thalfoetine B ( <b>2</b> ).....                                                          | 42 |
| <b>Figure S12.</b> IR spectrum of thalfoetine B ( <b>2</b> ) .....                                                             | 43 |
| <b>Figure S13.</b> UV spectrum of thalfoetine B ( <b>2</b> ).....                                                              | 44 |
| <b>Figure S14.</b> $^1\text{H}$ NMR spectrum of thalfoetine B ( <b>2</b> ) in $\text{DMSO-}d_6$ (600 MHz).....                 | 45 |
| <b>Figure S15.</b> $^{13}\text{C}$ NMR spectrum of thalfoetine B ( <b>2</b> ) in $\text{DMSO-}d_6$ (150 MHz).....              | 46 |
| <b>Figure S16.</b> HSQC spectrum of thalfoetine B ( <b>2</b> ) in $\text{DMSO-}d_6$ (600 MHz).....                             | 48 |
| <b>Figure S17.</b> HMBC spectrum of thalfoetine B ( <b>2</b> ) in $\text{DMSO-}d_6$ (600 MHz).....                             | 52 |
| <b>Figure S18.</b> $^1\text{H}$ - $^1\text{H}$ COSY spectrum of thalfoetine B ( <b>2</b> ) in $\text{DMSO-}d_6$ (600 MHz)..... | 56 |
| <b>Figure S19.</b> ROESY spectrum of voacafricine B ( <b>2</b> ) in $\text{DMSO-}d_6$ (600 MHz).....                           | 58 |
| <b>Figure S20.</b> HREIMS spectrum of thalfoetine C ( <b>3</b> ).....                                                          | 61 |
| <b>Figure S21.</b> IR spectrum of thalfoetine C ( <b>3</b> ).....                                                              | 62 |
| <b>Figure S22.</b> UV spectrum of thalfoetine C ( <b>3</b> ).....                                                              | 63 |
| <b>Figure S23.</b> $^1\text{H}$ NMR spectrum of thalfoetine C ( <b>3</b> ) in $\text{CDCl}_3$ (600 MHz).....                   | 64 |
| <b>Figure S24.</b> $^{13}\text{C}$ NMR spectrum of thalfoetine C ( <b>3</b> ) in $\text{CDCl}_3$ (150 MHz).....                | 65 |

|                                                                                                                   |    |
|-------------------------------------------------------------------------------------------------------------------|----|
| <b>Figure S25.</b> HSQC spectrum of thalfoetine C ( <b>3</b> ) in CDCl <sub>3</sub> (600 MHz).....                | 68 |
| <b>Figure S26.</b> HMBC spectrum of thalfoetine C ( <b>3</b> ) in CDCl <sub>3</sub> (600 MHz).....                | 71 |
| <b>Figure S27.</b> ROESY spectrum of thalfoetine C ( <b>3</b> ) in CDCl <sub>3</sub> (600 MHz).....               | 77 |
| <b>Figure S28.</b> HREIMS spectrum of thalfoetine D ( <b>4</b> ).....                                             | 78 |
| <b>Figure S29.</b> IR spectrum of thalfoetine D ( <b>4</b> ).....                                                 | 79 |
| <b>Figure S30.</b> UV spectrum of thalfoetine D ( <b>4</b> ).....                                                 | 80 |
| <b>Figure S31.</b> <sup>1</sup> H NMR spectrum of thalfoetine D ( <b>4</b> ) in CDCl <sub>3</sub> (600 MHz).....  | 81 |
| <b>Figure S32.</b> <sup>13</sup> C NMR spectrum of thalfoetine D ( <b>4</b> ) in CDCl <sub>3</sub> (150 MHz)..... | 82 |
| <b>Figure S33.</b> HSQC spectrum of thalfoetine D ( <b>4</b> ) in CDCl <sub>3</sub> (600 MHz).....                | 85 |
| <b>Figure S34.</b> HMBC spectrum of thalfoetine C ( <b>4</b> ) in CDCl <sub>3</sub> (600 MHz).....                | 87 |
| <b>Figure S35.</b> ROESY spectrum of thalfoetine C ( <b>4</b> ) in CDCl <sub>3</sub> (600 MHz).....               | 92 |

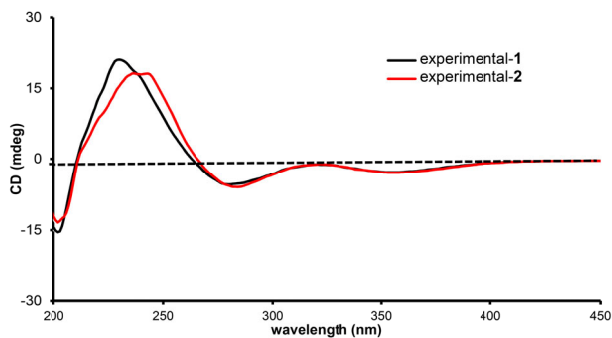

Figure S1. Experimental CD spectra of **1** and **2**

Table S1. The computed  $^{13}\text{C}$  NMR spectral data for **1**.

| No. | 1                   | $\delta$ exptl | Methanol             |                |                      |                |
|-----|---------------------|----------------|----------------------|----------------|----------------------|----------------|
|     |                     |                | $\delta$ calcd (6aS) | $\Delta\delta$ | $\delta$ calcd (6aR) | $\Delta\delta$ |
| 1   | 2                   | 145.2          | 144.8                | -0.4           | 145.7                | 0.5            |
| 2   | 1                   | 150.2          | 149.3                | -0.9           | 150.6                | 0.4            |
| 3   | 11b                 | 121.8          | 123.1                | 1.3            | 124.4                | 2.6            |
| 4   | 11c                 | 131.8          | 133.8                | 2.0            | 135.0                | 3.2            |
| 5   | 3a                  | 123.4          | 125.4                | 2.0            | 126.7                | 3.3            |
| 6   | 3                   | 151.0          | 149.0                | -2.0           | 150.0                | -1.0           |
| 7   | 6a                  | 62.6           | 60.5                 | -2.1           | 62.2                 | -0.4           |
| 8   | 5                   | 52.9           | 47.2                 | -5.7           | 49.0                 | -3.9           |
| 9   | 4                   | 23.7           | 19.8                 | -3.9           | 21.6                 | -2.1           |
| 10  | 11a                 | 135.4          | 136.9                | 1.5            | 137.2                | 1.8            |
| 11  | 7a                  | 128.0          | 128.2                | 0.2            | 129.4                | 1.4            |
| 12  | 7                   | 33.5           | 37.2                 | 3.7            | 39.0                 | 5.5            |
| 13  | 11                  | 111.0          | 109.1                | -1.9           | 110.0                | -1.0           |
| 14  | 10                  | 155.4          | 152.9                | -2.5           | 153.0                | -2.4           |
| 15  | 9                   | 126.1          | 125.0                | -1.1           | 125.6                | -0.5           |
| 16  | 8                   | 128.0          | 129.1                | 1.1            | 129.2                | 1.2            |
| 17  | N-CH3               | 44.0           | 42.2                 | -1.8           | 44.0                 | 0              |
| 18  | 9a                  | 200.5          | 197.0                | -3.5           | 198.2                | -2.3           |
| 19  | 1'                  | 115.8          | 118.8                | 3.0            | 115.8                | 0              |
| 20  | 2'                  | 157.5          | 150.0                | -7.5           | 158.8                | 1.3            |
| 21  | 3'                  | 136.3          | 132.4                | -3.9           | 134.3                | -2.0           |
| 22  | 4'                  | 158.6          | 154.4                | -4.2           | 157.4                | -1.2           |
| 23  | 5'                  | 102.7          | 100.5                | -2.2           | 101.5                | -1.2           |
| 24  | 6'                  | 130.5          | 126.1                | -4.4           | 130.0                | -0.5           |
| 25  | 1-OCH <sub>3</sub>  | 60.9           | 58.8                 | -2.1           | 60.5                 | -0.4           |
| 26  | 2-OCH <sub>3</sub>  | 61.0           | 60.0                 | -1.0           | 61.7                 | 0.7            |
| 27  | 3-OCH <sub>3</sub>  | 60.4           | 58.2                 | -2.2           | 59.9                 | -0.5           |
| 28  | 10-OCH <sub>3</sub> | 55.9           | 53.9                 | -2.0           | 55.3                 | -0.6           |
| 29  | 3'-OCH <sub>3</sub> | 60.7           | 57.9                 | -2.8           | 58.9                 | -1.8           |
| 30  | 4'-OCH <sub>3</sub> | 115.8          | 118.8                | 3.0            | 55.9                 | -0.2           |

## 1. Experimental section

### 1.1. General Experimental Procedures

An Agilent 1290 UPLC/6540 Q-TOF spectrometer were used to measure ESIMS and HREIMS spectra, respectively. UV spectra were detected on a Shimadzu UV-2401 PC spectrophotometer. IR spectra were scanning with a Bruker Tensor-27 infrared spectrometer and a KBr disk. Optical rotations were determined on a JASCO P-1020 digital polarimeter. CD spectra were detected on an Applied Photophysics Circular dichromatograph. 1D and 2D NMR spectra were recorded on a Bruker AVANCE 600 spectrometers with TMS as internal standard. Column chromatography was performed on silica gel (200–300 mesh, Qingdao Marine Chemical CO., Ltd., Qingdao, China), Sephadex LH-20 (20–150 $\mu$ m, Amersham Pharmacia Biotech AB, Uppsala, Sweden) and Rp-C18 (40–63  $\mu$ m, Fuji). Thin layer chromatography (TLC) was performed on silica gel plates (GF254, Qingdao Marine Chemical CO., Ltd., Qingdao, China) and RP-18 F254 (Merck). Fractions were monitored by TLC and spots were visualized by spraying with Dragendorff's reagent. Methanol, hydrochloric, ethyl acetate, chloroform ammonia solution and acetone were purchased from Tianjin Chemical Reagents Co. (Tianjin, China). Scanning Electron Microscope was used to evaluated the membrane morphology (Hitachi S-3000N). Laser Scanning Confocal Microscopy was used to evaluated the intracellular nucleic acid content (Japan, FV1000).

### 1.2. Plant material

The roots of *Thalictrum foetidum* were harvested at Yunnan in March 2017. Botanical identification was done at the Kunming Medical University by Mr. Jun Zhang and where a voucher specimen was kept under the reference number (No. 20170301).

### 1.3 Extraction and Isolation

Air-dried and powdered roots (7.2 kg) of *Thalictrum foetidum* were collected from Yunnan and extracted with methanol (2 h  $\times$  3) under reflux conditions. The solvent was evaporated *in vacuo* to give a residue, which was dissolved in 0.5% hydrochloric

acid and then adjusted to a pH of 2. The solution was filtered and adjusted to a pH of 10 with 10% ammonia, and the basified solution was then partitioned with EtOAc to afford the alkaloidal extract (90.0 g). The extract was chromatographed on a silica gel column (chloroform-methyl, 100:0 to 0:100 v/v) to afford fractions I- IX. Fraction IV (2.2 g) was subjected to a preparative reversed-phase Rp-C18 column with a gradient elution of 0-100% (v/v) methanol-water to yield subfractions IV-1 to IV-6. Subfraction IV-4 (1.3 g) was further separated on sephedex-LH20, silica gel column (petroleum ether-ethyl acetate, 2:1 to 1:1 v/v) and purified by semi-preparative HPLC (Acetonitrile-H<sub>2</sub>O, 80:20, V/V) to yield compound **1** (18.0 mg) and compound **2** (24.0 mg). Fraction I (180.0 mg) was subjected to a silica gel column (Petroleum ether-acetone, 6:1 to 2:1 v/v) to afford fractions I-1 to I-5. Subfraction I-4 (140.0 mg) was further separated on sephedex-LH20 and purified by semi-preparative HPLC (Acetonitrile-H<sub>2</sub>O, 90:10, V/V) to yield compound **3** (1.0 mg) and compound **4** (1.5 mg).

#### 1.4 Compounds

Thalfoetine A (**1**): Light yellow amorphous powder; HRESIMS at m/z 536.2279 [M + H]<sup>+</sup> (calcd 536.2279, C<sub>30</sub>H<sub>33</sub>NO<sub>8</sub>); [ $\alpha$ ]<sub>D</sub><sup>25</sup> = -36.4 (c 0.45, CH<sub>3</sub>OH); UV (MeOH)  $\lambda_{\max}$  (log  $\epsilon$ ): 219 (4.67), 289 (4.35) and 330 (4.18); IR (KBr)  $\nu_{\max}$ : 3447, 2928, 1627, 1502, 1461, 1452, 1285, 1101, 791 and 774 cm<sup>-1</sup>; <sup>1</sup>H and <sup>13</sup>C NMR data see Table S1.

Thalfoetine B (**2**): Yellow amorphous powder; HRESIMS at m/z 536.2279 [M + H]<sup>+</sup> (calcd 536.2279, C<sub>30</sub>H<sub>33</sub>NO<sub>8</sub>); [ $\alpha$ ]<sub>D</sub><sup>25</sup> = -12.2 (c 0.58, CH<sub>3</sub>OH); UV (MeOH)  $\lambda_{\max}$  (log  $\epsilon$ ): 216 (4.25), 284 (3.92) and 352 (3.73); IR (KBr)  $\nu_{\max}$ : 3447, 1630, 1465, 1396, 1343, 1102, 804 and 470 cm<sup>-1</sup>; <sup>1</sup>H and <sup>13</sup>C NMR data see Table S1.

Thalfoetine C (**3**): Yellow amorphous powder; HRESIMS at m/z 556.1941 [M + Na]<sup>+</sup> (calcd 556.1942, C<sub>30</sub>H<sub>31</sub>NO<sub>8</sub>); UV (MeOH)  $\lambda_{\max}$  (log  $\epsilon$ ): 209 (3.92), 238 (3.77), 266 (3.66), 316 (3.56) and 416 (2.92); IR (KBr)  $\nu_{\max}$ : 3441, 2922, 1632, 1464, 1386, 1053 and 584 cm<sup>-1</sup>; <sup>1</sup>H and <sup>13</sup>C NMR data see Table S1.

Thalfoetine D (**4**): Yellow amorphous powder; HRESIMS at m/z 556.1941 [M + Na]<sup>+</sup> (calcd 556.1942, C<sub>30</sub>H<sub>31</sub>NO<sub>8</sub>); UV (MeOH)  $\lambda_{\max}$  (log  $\epsilon$ ): 205 (4.21), 248 (4.25),

287 (4.10) and 339 (3.92); IR (KBr)  $\nu_{\max}$ : 3441, 2922, 1630, 1463, 1385, 1062 and 583  $\text{cm}^{-1}$ ;  $^1\text{H}$  and  $^{13}\text{C}$  NMR data see Table S1.

### 1.5. Quantum Chemical ECD and NMR Calculations

The theoretical calculation of compound **1** was performed using Gaussian 09<sup>1</sup> and figured using Gauss View 5.0<sup>2</sup>. Conformation search using molecular mechanics calculations was performed in Discovery Studio 3.5 Client with MMFF force field with 20  $\text{kcal mol}^{-1}$  upper energy limit.<sup>3</sup>

The optimized conformation geometries and thermodynamic parameters of all selected conformations were provided. The predominant conformers were optimized at B3LYP/6-31G (d, p) level. The theoretical calculation of ECD was performed using time dependent Density Functional Theory (TDDFT) at B3LYP/6-31G (2d, p) level in MeOH with PCM model<sup>4</sup>. The ECD spectrum of compound **1** was obtained by weighing the Boltzmann distribution rate of each geometric conformation<sup>5</sup>. The ECD spectra were simulated by overlapping Gaussian functions for each transition.

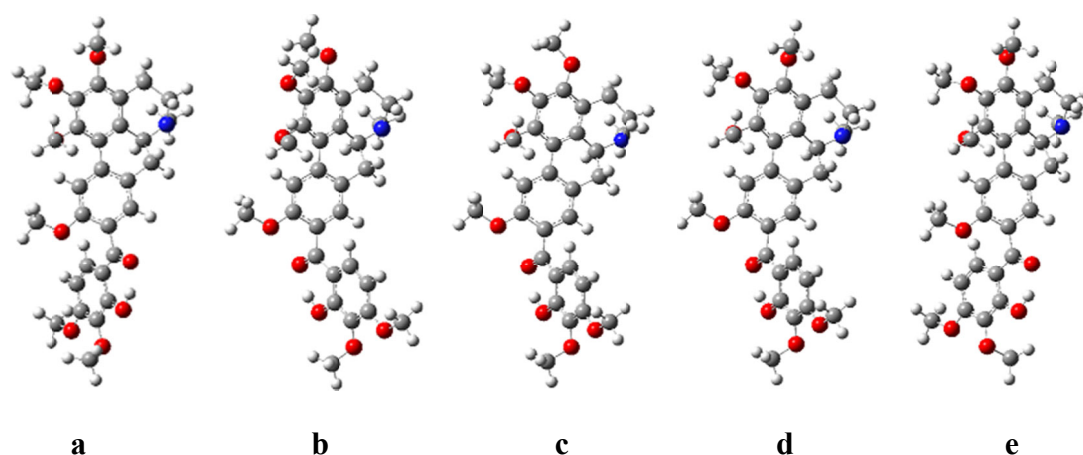

**Figure 1.5.1 Optimized geometries of predominant conformers for compound 1 at the B3LYP/6-31G(d,p) level in the gas phase.**

**Table 1.5-1** Important thermodynamic parameters (a.u.) and Boltzmann distributions of the optimized compound **1** (6aR) at B3LYP/6-31G(d,p) level in the gas phase

| Conformations    | E+ZPE        | G            | %    |
|------------------|--------------|--------------|------|
| <b>1 (6aR)-a</b> | -1818.988793 | -1819.060341 | 27.5 |
| <b>1 (6aR)-b</b> | -1818.984712 | -1819.056840 | 0.7  |
| <b>1 (6aR)-c</b> | -1818.985929 | -1819.059370 | 9.9  |
| <b>1 (6aR)-d</b> | -1818.987841 | -1819.059937 | 18   |
| <b>1 (6aR)-e</b> | -1818.988817 | -1819.060782 | 43.9 |

E+ZPE, G: total energy with zero point energy (ZPE) and Gibbs free energy in the gas phase at B3LYP/6-31G(d,p) level., %: Boltzmann distributions, using the relative Gibbs free energies as weighting factors.

**Table 1.5-2.** Optimized Z-matrixes of compound **1** in the gas phase (Å) at B3LYP/6-31G(d,p) level

| <b>1 (6aR)-a</b> |          |          |          | <b>1 (6aR)-b</b> |          |          |          |
|------------------|----------|----------|----------|------------------|----------|----------|----------|
| C                | 4.76336  | -1.46827 | 0.143037 | C                | -4.80935 | -1.1867  | 0.584094 |
| C                | 3.375623 | -1.41803 | -0.06709 | C                | -3.44043 | -1.35014 | 0.303718 |
| C                | 2.680928 | -0.19282 | -0.03933 | C                | -2.65492 | -0.26578 | -0.1376  |
| C                | 3.434264 | 0.984646 | 0.21408  | C                | -3.27992 | 1.001394 | -0.27061 |
| C                | 4.824056 | 0.947375 | 0.373075 | C                | -4.6411  | 1.171966 | 0.003196 |
| C                | 5.488402 | -0.29075 | 0.346153 | C                | -5.40689 | 0.065574 | 0.398656 |
| C                | 2.669568 | 2.307205 | 0.271814 | C                | -2.41564 | 2.173964 | -0.73219 |
| N                | 3.486287 | 3.526498 | 0.362748 | N                | -3.03011 | 3.509266 | -0.6418  |
| C                | 4.836104 | 3.368501 | -0.17293 | C                | -4.17013 | 3.585792 | 0.268084 |
| C                | 5.610239 | 2.23123  | 0.505162 | C                | -5.25644 | 2.550925 | -0.05364 |
| C                | 1.223441 | -0.0614  | -0.31186 | C                | -1.19788 | -0.37281 | -0.42589 |
| C                | 0.74317  | 1.176782 | -0.79663 | C                | -0.40656 | 0.789461 | -0.29978 |
| C                | 1.691456 | 2.346069 | -0.91407 | C                | -1.07329 | 2.106473 | 0.01557  |
| C                | 0.309367 | -1.11323 | -0.12062 | C                | -0.58446 | -1.57195 | -0.83269 |
| C                | -1.04588 | -0.95805 | -0.4193  | C                | 0.786812 | -1.63297 | -1.08777 |
| C                | -1.52719 | 0.271209 | -0.91157 | C                | 1.586892 | -0.48211 | -0.9305  |
| C                | -0.60802 | 1.30598  | -1.10763 | C                | 0.965469 | 0.706146 | -0.53716 |
| C                | 3.459866 | 4.149869 | 1.681598 | C                | -3.28558 | 4.121142 | -1.94076 |
| H                | 2.047317 | 2.271963 | 1.177442 | H                | -2.18425 | 1.994409 | -1.7923  |
| C                | -2.94942 | 0.514542 | -1.32671 | C                | 3.04009  | -0.49156 | -1.3069  |
| C                | -4.06886 | 0.329446 | -0.40358 | C                | 4.059484 | -0.07724 | -0.33859 |
| O                | -3.13605 | 0.945873 | -2.4836  | O                | 3.351182 | -0.82709 | -2.46524 |
| C                | -5.40042 | 0.515977 | -0.88509 | C                | 5.415643 | 0.040027 | -0.77272 |
| C                | -6.49532 | 0.338349 | -0.02208 | C                | 6.413998 | 0.444771 | 0.129258 |
| C                | -6.27428 | 0.010702 | 1.326102 | C                | 6.078877 | 0.711571 | 1.467912 |
| C                | -4.96065 | -0.12824 | 1.819237 | C                | 4.745677 | 0.585685 | 1.907237 |
| C                | -3.88917 | 0.024929 | 0.958258 | C                | 3.765863 | 0.194243 | 1.011517 |
| O                | -5.65486 | 0.858671 | -2.15512 | O                | 5.781593 | -0.22643 | -2.03313 |
| O                | 2.720115 | -2.61845 | -0.25794 | O                | -2.90173 | -2.61238 | 0.434577 |
| C                | 2.89101  | -3.18973 | -1.5626  | C                | -2.54671 | -2.9875  | 1.765362 |
| O                | 5.415302 | -2.68455 | 0.108151 | O                | -5.52973 | -2.29015 | 0.979478 |
| C                | 5.364272 | -3.40178 | 1.347793 | C                | -6.16549 | -2.20257 | 2.26177  |
| O                | 6.842103 | -0.31376 | 0.581514 | O                | -6.75432 | 0.240916 | 0.647676 |
| C                | 7.665564 | -0.80287 | -0.48529 | C                | -7.61438 | -0.33818 | -0.34266 |
| O                | -1.96336 | -1.9629  | -0.29119 | O                | 1.434392 | -2.77209 | -1.45869 |



|                  |          |          |          |                  |          |          |          |
|------------------|----------|----------|----------|------------------|----------|----------|----------|
| C                | -1.53022 | -3.22658 | 0.187249 | C                | 0.670442 | -3.94671 | -1.6828  |
| O                | -7.77735 | 0.5611   | -0.45234 | O                | 7.705455 | 0.634229 | -0.28742 |
| C                | -8.30105 | -0.42673 | -1.34383 | C                | 8.440387 | -0.56449 | -0.55079 |
| O                | -7.39123 | -0.14064 | 2.080441 | O                | 7.112677 | 1.077678 | 2.265291 |
| C                | -7.24238 | -0.43323 | 3.462276 | C                | 6.844072 | 1.385672 | 3.625874 |
| H                | 4.763797 | 3.163356 | -1.24864 | H                | -3.81597 | 3.422701 | 1.294096 |
| H                | 5.364219 | 4.321775 | -0.06448 | H                | -4.5727  | 4.603275 | 0.227432 |
| H                | 6.601348 | 2.106185 | 0.058819 | H                | -6.08841 | 2.613354 | 0.653628 |
| H                | 5.787794 | 2.474222 | 1.561535 | H                | -5.68121 | 2.754363 | -1.04642 |
| H                | 2.257694 | 2.312203 | -1.85618 | H                | -1.25602 | 2.221852 | 1.094019 |
| H                | 1.143304 | 3.292167 | -0.90203 | H                | -0.44266 | 2.944585 | -0.29452 |
| H                | 0.677992 | -2.05704 | 0.247853 | H                | -1.19528 | -2.45391 | -0.94281 |
| H                | -0.97589 | 2.247908 | -1.50383 | H                | 1.569622 | 1.604916 | -0.44748 |
| H                | 2.424649 | 4.365164 | 1.964105 | H                | -2.35903 | 4.148261 | -2.52252 |
| H                | 3.994772 | 5.104355 | 1.639332 | H                | -3.61226 | 5.155949 | -1.79464 |
| H                | 3.909114 | 3.54694  | 2.491718 | H                | -4.04956 | 3.608828 | -2.55433 |
| H                | -4.78422 | -0.35853 | 2.862064 | H                | 4.484279 | 0.779156 | 2.939533 |
| H                | -2.88193 | -0.08188 | 1.342581 | H                | 2.745072 | 0.083375 | 1.358032 |
| H                | -4.76093 | 0.989474 | -2.57847 | H                | 4.9501   | -0.53503 | -2.49202 |
| H                | 2.331864 | -4.12779 | -1.56138 | H                | -2.10103 | -3.98218 | 1.69722  |
| H                | 2.483819 | -2.52606 | -2.33405 | H                | -1.81444 | -2.29127 | 2.19206  |
| H                | 3.946743 | -3.39351 | -1.76254 | H                | -3.42698 | -3.03573 | 2.414561 |
| H                | 5.83764  | -2.82507 | 2.150645 | H                | -5.42764 | -2.01421 | 3.051848 |
| H                | 4.329481 | -3.63595 | 1.618493 | H                | -6.92197 | -1.41466 | 2.285472 |
| H                | 5.919582 | -4.32876 | 1.190275 | H                | -6.63169 | -3.17516 | 2.430959 |
| H                | 8.696165 | -0.70321 | -0.13881 | H                | -8.63619 | -0.11127 | -0.03199 |
| H                | 7.44745  | -1.84951 | -0.70932 | H                | -7.42742 | 0.105251 | -1.32804 |
| H                | 7.529745 | -0.19728 | -1.39015 | H                | -7.47675 | -1.42258 | -0.40068 |
| H                | -2.41898 | -3.85886 | 0.20184  | H                | 1.384371 | -4.70974 | -1.99555 |
| H                | -0.77737 | -3.67325 | -0.47392 | H                | 0.159252 | -4.28024 | -0.77071 |
| H                | -1.11744 | -3.15829 | 1.201622 | H                | -0.07363 | -3.79988 | -2.4751  |
| H                | -9.32408 | -0.11879 | -1.56974 | H                | 9.442696 | -0.24687 | -0.84544 |
| H                | -7.72123 | -0.47387 | -2.27056 | H                | 8.510377 | -1.18809 | 0.349513 |
| H                | -8.3198  | -1.41557 | -0.86797 | H                | 7.985346 | -1.13823 | -1.36375 |
| H                | -8.25512 | -0.50097 | 3.861532 | H                | 7.804145 | 1.665279 | 4.06132  |
| H                | -6.72643 | -1.38823 | 3.622039 | H                | 6.146204 | 2.226566 | 3.71966  |
| H                | -6.69955 | 0.361793 | 3.987909 | H                | 6.440837 | 0.520025 | 4.165875 |
| <b>1 (6aR)-c</b> |          |          |          | <b>1 (6aR)-d</b> |          |          |          |
| C                | -4.83173 | -1.02417 | 0.70186  | C                | 4.8108   | 1.091933 | 0.654235 |
| C                | -3.46825 | -1.22761 | 0.40912  | C                | 3.452492 | 1.292305 | 0.357675 |
| C                | -2.66121 | -0.20546 | -0.11598 | C                | 2.664609 | 0.253442 | -0.17456 |
| C                | -3.26749 | 1.064714 | -0.3112  | C                | 3.293746 | -1.00006 | -0.39906 |
| C                | -4.5934  | 1.304127 | 0.046445 | C                | 4.630584 | -1.22348 | -0.05216 |

|   |          |          |          |   |          |          |          |
|---|----------|----------|----------|---|----------|----------|----------|
| C | -5.39612 | 0.247918 | 0.532012 | C | 5.394315 | -0.1646  | 0.468445 |
| C | -2.39862 | 2.166278 | -0.91682 | C | 2.439087 | -2.11292 | -1.00511 |
| N | -2.99475 | 3.50826  | -0.96696 | N | 3.058573 | -3.44452 | -1.07107 |
| C | -4.0155  | 3.723493 | 0.055545 | C | 4.108595 | -3.65057 | -0.07672 |
| C | -5.16017 | 2.705524 | -0.01817 | C | 5.228314 | -2.60641 | -0.17399 |
| C | -1.21025 | -0.35761 | -0.40602 | C | 1.209358 | 0.381886 | -0.46041 |
| C | -0.39989 | 0.799556 | -0.39234 | C | 0.420894 | -0.79    | -0.44721 |
| C | -1.03924 | 2.154409 | -0.19872 | C | 1.088538 | -2.13309 | -0.27005 |
| C | -0.61268 | -1.59936 | -0.69286 | C | 0.58849  | 1.614023 | -0.73773 |
| C | 0.757542 | -1.70614 | -0.93632 | C | -0.78549 | 1.696469 | -0.97036 |
| C | 1.575348 | -0.55787 | -0.89063 | C | -1.58163 | 0.533888 | -0.92149 |
| C | 0.970578 | 0.67207  | -0.61832 | C | -0.95386 | -0.68643 | -0.66004 |
| C | -3.42686 | 3.904781 | -2.30307 | C | 3.457069 | -3.83654 | -2.41898 |
| H | -2.19442 | 1.868589 | -1.95504 | H | 2.216982 | -1.8121  | -2.03876 |
| C | 3.029779 | -0.62542 | -1.25426 | C | -3.04169 | 0.579023 | -1.26904 |
| C | 4.049066 | -0.12557 | -0.32643 | C | -4.04326 | 0.089556 | -0.31775 |
| O | 3.344018 | -1.08338 | -2.36919 | O | -3.37309 | 1.011022 | -2.38904 |
| C | 5.408008 | -0.06364 | -0.76315 | C | -5.40885 | 0.014816 | -0.73102 |
| C | 6.406234 | 0.420942 | 0.098724 | C | -6.39103 | -0.45671 | 0.156071 |
| C | 6.068027 | 0.822474 | 1.40255  | C | -6.0295  | -0.83372 | 1.461094 |
| C | 4.732122 | 0.751191 | 1.845804 | C | -4.68633 | -0.75193 | 1.880148 |
| C | 3.752452 | 0.281164 | 0.988469 | C | -3.72273 | -0.29413 | 0.998479 |
| O | 5.776263 | -0.45743 | -1.98922 | O | -5.79821 | 0.384632 | -1.95803 |
| O | -2.95349 | -2.48549 | 0.669533 | O | 2.936791 | 2.556254 | 0.567606 |
| C | -2.63785 | -2.71094 | 2.050467 | C | 2.681744 | 2.875153 | 1.941969 |
| O | -5.56701 | -2.04963 | 1.265916 | O | 5.55919  | 2.131082 | 1.169694 |
| C | -5.84634 | -3.15858 | 0.401455 | C | 6.042564 | 3.04341  | 0.175221 |
| O | -6.67231 | 0.605963 | 0.856719 | O | 6.726248 | -0.38296 | 0.72611  |
| C | -7.74026 | -0.33814 | 0.898579 | C | 7.147189 | -0.22678 | 2.087339 |
| O | 1.38868  | -2.88668 | -1.18958 | O | -1.44054 | 2.865531 | -1.21587 |
| C | 0.609711 | -4.06783 | -1.28763 | C | -0.68362 | 4.060733 | -1.32035 |
| O | 7.700764 | 0.55977  | -0.32834 | O | -7.69213 | -0.60659 | -0.24616 |
| C | 8.427512 | -0.66338 | -0.4763  | C | -8.42457 | 0.611814 | -0.40561 |
| O | 7.101656 | 1.258291 | 2.164402 | O | -7.04877 | -1.25783 | 2.248237 |
| C | 6.829691 | 1.706232 | 3.48483  | C | -6.75392 | -1.67742 | 3.573147 |
| H | -3.53924 | 3.654917 | 1.04188  | H | 3.657835 | -3.60219 | 0.922887 |
| H | -4.39534 | 4.745934 | -0.04437 | H | 4.505755 | -4.66391 | -0.19886 |
| H | -5.86234 | 2.855409 | 0.807142 | H | 5.977345 | -2.75591 | 0.609515 |
| H | -5.74385 | 2.851334 | -0.93743 | H | 5.766425 | -2.71808 | -1.125   |
| H | -1.18749 | 2.381935 | 0.867226 | H | 1.255323 | -2.36472 | 0.792295 |
| H | -0.40531 | 2.944607 | -0.61092 | H | 0.465218 | -2.93304 | -0.67951 |
| H | -1.23493 | -2.47978 | -0.71432 | H | 1.19517  | 2.505077 | -0.76214 |
| H | 1.588096 | 1.56621  | -0.61414 | H | -1.55577 | -1.59121 | -0.65388 |

|                  |          |          |          |   |          |          |          |
|------------------|----------|----------|----------|---|----------|----------|----------|
| H                | -2.57894 | 3.852214 | -2.99308 | H | 2.58944  | -3.79313 | -3.08463 |
| H                | -3.76672 | 4.945362 | -2.27689 | H | 3.808477 | -4.87344 | -2.40302 |
| H                | -4.24296 | 3.293634 | -2.72917 | H | 4.254017 | -3.21659 | -2.86789 |
| H                | 4.468067 | 1.047515 | 2.852742 | H | -4.40445 | -1.03085 | 2.887189 |
| H                | 2.729412 | 0.213075 | 1.339197 | H | -2.69383 | -0.21798 | 1.330072 |
| H                | 4.944096 | -0.80617 | -2.41737 | H | -4.97462 | 0.726833 | -2.4069  |
| H                | -2.25948 | -3.73325 | 2.116572 | H | 2.296915 | 3.897081 | 1.952779 |
| H                | -1.86272 | -2.01461 | 2.390217 | H | 1.928273 | 2.200156 | 2.364569 |
| H                | -3.53042 | -2.60834 | 2.675001 | H | 3.601817 | 2.824289 | 2.53115  |
| H                | -6.45242 | -2.84307 | -0.45747 | H | 6.68968  | 2.52796  | -0.54364 |
| H                | -4.92401 | -3.62454 | 0.0469   | H | 5.209861 | 3.521466 | -0.35062 |
| H                | -6.4156  | -3.87326 | 0.999654 | H | 6.621962 | 3.800372 | 0.707936 |
| H                | -8.65065 | 0.263515 | 0.947835 | H | 8.211602 | -0.4696  | 2.101871 |
| H                | -7.76773 | -0.94964 | -0.01056 | H | 6.993895 | 0.79664  | 2.436722 |
| H                | -7.67681 | -0.9904  | 1.770861 | H | 6.610398 | -0.92386 | 2.743253 |
| H                | 1.313735 | -4.86989 | -1.51333 | H | -1.40387 | 4.850125 | -1.53924 |
| H                | 0.092091 | -4.29384 | -0.34649 | H | -0.1618  | 4.295365 | -0.38371 |
| H                | -0.13064 | -3.99893 | -2.09419 | H | 0.050496 | 4.005084 | -2.1335  |
| H                | 9.433686 | -0.38129 | -0.79316 | H | -9.43522 | 0.321179 | -0.69961 |
| H                | 8.488487 | -1.20218 | 0.47783  | H | -8.47068 | 1.169046 | 0.538707 |
| H                | 7.972156 | -1.30616 | -1.23564 | H | -7.98391 | 1.240632 | -1.18502 |
| H                | 7.7903   | 2.020531 | 3.894699 | H | -7.70687 | -1.98507 | 4.005285 |
| H                | 6.139167 | 2.558306 | 3.488133 | H | -6.06137 | -2.5278  | 3.582977 |
| H                | 6.415943 | 0.904132 | 4.10856  | H | -6.332   | -0.86137 | 4.172794 |
| <b>1 (6aR)-e</b> |          |          |          |   |          |          |          |
| C                | 4.800464 | -1.40753 | 0.108692 |   |          |          |          |
| C                | 3.41264  | -1.3846  | -0.10509 |   |          |          |          |
| C                | 2.687214 | -0.1788  | -0.03778 |   |          |          |          |
| C                | 3.409774 | 1.007592 | 0.259797 |   |          |          |          |
| C                | 4.799587 | 0.999223 | 0.423361 |   |          |          |          |
| C                | 5.494865 | -0.22014 | 0.356231 |   |          |          |          |
| C                | 2.612238 | 2.308297 | 0.359422 |   |          |          |          |
| N                | 3.398685 | 3.543725 | 0.494036 |   |          |          |          |
| C                | 4.753341 | 3.436105 | -0.04169 |   |          |          |          |
| C                | 5.553383 | 2.296759 | 0.601556 |   |          |          |          |
| C                | 1.228211 | -0.07462 | -0.31387 |   |          |          |          |
| C                | 0.718815 | 1.16736  | -0.75767 |   |          |          |          |
| C                | 1.637308 | 2.363951 | -0.8283  |   |          |          |          |
| C                | 0.340646 | -1.1557  | -0.16668 |   |          |          |          |
| C                | -1.01615 | -1.02572 | -0.47047 |   |          |          |          |
| C                | -1.52646 | 0.207758 | -0.92213 |   |          |          |          |
| C                | -0.63326 | 1.272427 | -1.07374 |   |          |          |          |
| C                | 3.353511 | 4.122095 | 1.832729 |   |          |          |          |

|   |          |          |          |  |  |  |  |
|---|----------|----------|----------|--|--|--|--|
| H | 1.988556 | 2.227266 | 1.261132 |  |  |  |  |
| C | -2.9509  | 0.426703 | -1.34288 |  |  |  |  |
| C | -4.07449 | 0.166432 | -0.44264 |  |  |  |  |
| O | -3.1389  | 0.902844 | -2.48167 |  |  |  |  |
| C | -5.40588 | 0.311237 | -0.93845 |  |  |  |  |
| C | -6.50351 | 0.059041 | -0.0982  |  |  |  |  |
| C | -6.28836 | -0.29529 | 1.243773 |  |  |  |  |
| C | -4.97688 | -0.41722 | 1.746742 |  |  |  |  |
| C | -3.90129 | -0.18898 | 0.907591 |  |  |  |  |
| O | -5.65875 | 0.685956 | -2.19958 |  |  |  |  |
| O | 2.789264 | -2.59401 | -0.34154 |  |  |  |  |
| C | 2.972029 | -3.10762 | -1.66838 |  |  |  |  |
| O | 5.482829 | -2.60495 | 0.032367 |  |  |  |  |
| C | 5.450016 | -3.3654  | 1.246554 |  |  |  |  |
| O | 6.848104 | -0.21761 | 0.595842 |  |  |  |  |
| C | 7.686306 | -0.64529 | -0.48586 |  |  |  |  |
| O | -1.90665 | -2.05834 | -0.38689 |  |  |  |  |
| C | -1.44214 | -3.33056 | 0.036859 |  |  |  |  |
| O | -7.78479 | 0.112205 | -0.58297 |  |  |  |  |
| C | -8.29942 | 1.430776 | -0.7856  |  |  |  |  |
| O | -7.40955 | -0.49057 | 1.98204  |  |  |  |  |
| C | -7.26766 | -0.87126 | 3.343127 |  |  |  |  |
| H | 4.688738 | 3.264272 | -1.12371 |  |  |  |  |
| H | 5.25762  | 4.39802  | 0.099215 |  |  |  |  |
| H | 6.548673 | 2.211135 | 0.155184 |  |  |  |  |
| H | 5.721674 | 2.508753 | 1.666061 |  |  |  |  |
| H | 2.207629 | 2.378798 | -1.76847 |  |  |  |  |
| H | 1.064921 | 3.294696 | -0.78487 |  |  |  |  |
| H | 0.731081 | -2.10223 | 0.17084  |  |  |  |  |
| H | -1.02284 | 2.217875 | -1.43971 |  |  |  |  |
| H | 2.312731 | 4.305409 | 2.117549 |  |  |  |  |
| H | 3.867801 | 5.088775 | 1.824478 |  |  |  |  |
| H | 3.812631 | 3.502416 | 2.62444  |  |  |  |  |
| H | -4.80501 | -0.67803 | 2.783137 |  |  |  |  |
| H | -2.89571 | -0.27494 | 1.301436 |  |  |  |  |
| H | -4.76687 | 0.873202 | -2.60408 |  |  |  |  |
| H | 2.438159 | -4.05959 | -1.7043  |  |  |  |  |
| H | 2.545403 | -2.42432 | -2.41167 |  |  |  |  |
| H | 4.03241  | -3.27484 | -1.87777 |  |  |  |  |
| H | 5.907895 | -2.8043  | 2.069195 |  |  |  |  |
| H | 4.421522 | -3.63553 | 1.50766  |  |  |  |  |
| H | 6.029301 | -4.27169 | 1.05806  |  |  |  |  |
| H | 8.713114 | -0.53881 | -0.13026 |  |  |  |  |

|   |          |          |          |  |  |  |  |
|---|----------|----------|----------|--|--|--|--|
| H | 7.490974 | -1.68609 | -0.75374 |  |  |  |  |
| H | 7.541856 | -0.0059  | -1.36581 |  |  |  |  |
| H | -2.3138  | -3.98595 | 0.016658 |  |  |  |  |
| H | -0.67401 | -3.7262  | -0.639   |  |  |  |  |
| H | -1.0369  | -3.29746 | 1.056025 |  |  |  |  |
| H | -9.3189  | 1.305668 | -1.15647 |  |  |  |  |
| H | -8.32581 | 1.992132 | 0.157056 |  |  |  |  |
| H | -7.70769 | 1.978378 | -1.52579 |  |  |  |  |
| H | -8.28243 | -0.98441 | 3.726623 |  |  |  |  |
| H | -6.73537 | -1.82506 | 3.442555 |  |  |  |  |
| H | -6.7443  | -0.10395 | 3.9271   |  |  |  |  |

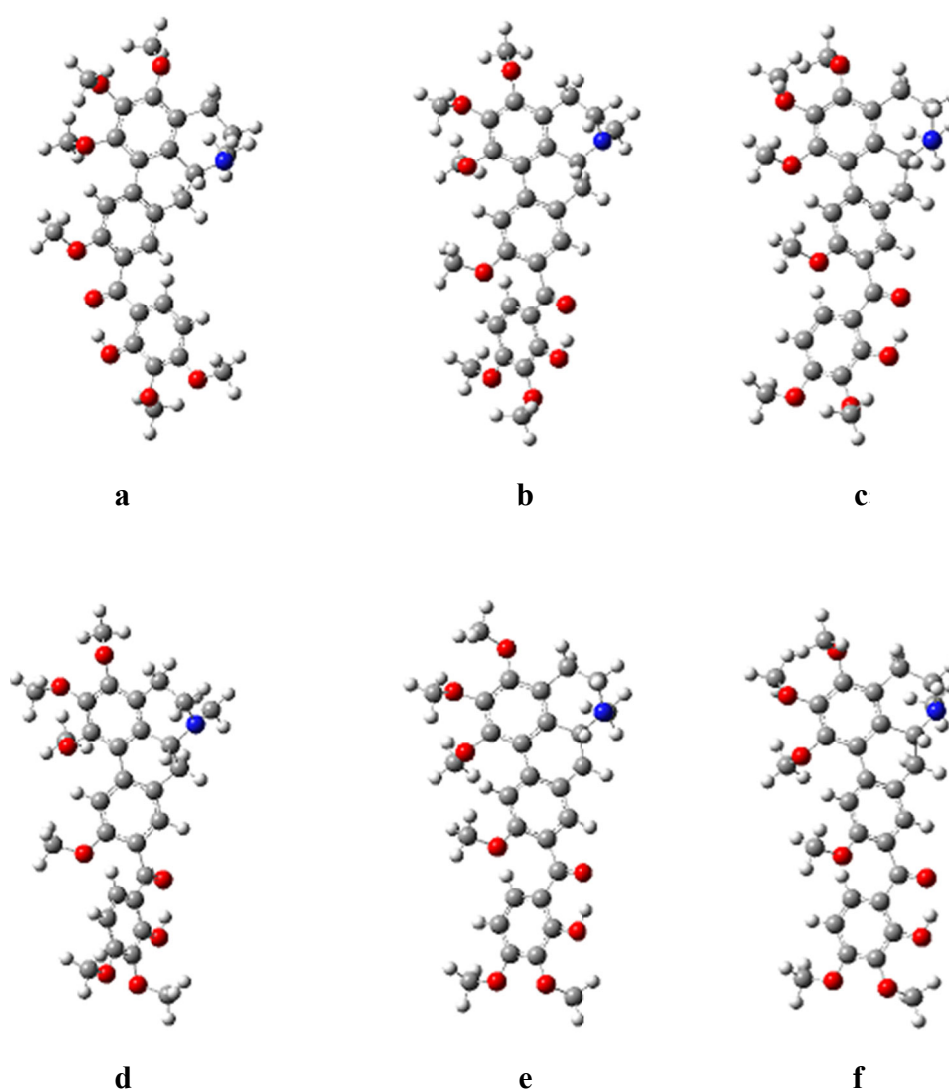

**Figure 1.5.2** Optimized geometries of predominant conformers for compound 1 at the B3LYP/6-31G(d,p) level in the gas phase.

**Table 1.5.3.** Important thermodynamic parameters (a.u.) and Boltzmann distributions of the optimized compound **1(6aS)** at B3LYP/6-31G(d,p) level in the gas phase

| Conformations    | E+ZPE        | G            | %    |
|------------------|--------------|--------------|------|
| <b>1 (6aS)-a</b> | -1818.988535 | -1819.060090 | 14.4 |
| <b>1 (6aS)-b</b> | -1818.989647 | -1819.061279 | 55.6 |
| <b>1 (6aS)-c</b> | -1818.984148 | -1819.054905 | 0.1  |
| <b>1 (6aS)-d</b> | -1818.989450 | -1819.060610 | 26.1 |
| <b>1 (6aS)-e</b> | -1818.987746 | -1819.058215 | 1.7  |
| <b>1 (6aS)-f</b> | -1818.986764 | -1819.058403 | 2.1  |

E+ZPE, G: total energy with zero point energy (ZPE) and Gibbs free energy in the gas phase at B3LYP/6-31G(d,p) level., %: Boltzmann distributions, using the relative Gibbs free energies as weighting factors

**Table S1.5.4.** Optimized Z-matrixes of compound **1 (6aS)** in the gas phase (Å) at B3LYP/6-31G(d,p) level

| <b>1 (6aS)-a</b> |          |          |          | <b>1 (6aS)-b</b> |          |          |          |
|------------------|----------|----------|----------|------------------|----------|----------|----------|
| C                | 5.010531 | -0.83645 | -0.26315 | C                | -4.55216 | 1.671889 | -0.05759 |
| C                | 3.665586 | -1.19875 | -0.09124 | C                | -3.16971 | 1.439554 | -0.11486 |
| C                | 2.659493 | -0.21881 | 0.023443 | C                | -2.65559 | 0.127318 | -0.13472 |
| C                | 3.059432 | 1.143174 | 0.003701 | C                | -3.58102 | -0.94625 | -0.05322 |
| C                | 4.394693 | 1.512745 | -0.20026 | C                | -4.9636  | -0.72224 | -0.02735 |
| C                | 5.372262 | 0.512284 | -0.32566 | C                | -5.44448 | 0.59678  | -0.02285 |
| C                | 1.988112 | 2.226466 | 0.18245  | C                | -3.04145 | -2.38256 | -0.03276 |
| N                | 2.516841 | 3.558132 | 0.506742 | N                | -4.01439 | -3.39273 | 0.401891 |
| C                | 3.588434 | 3.891751 | -0.43295 | C                | -5.26492 | -3.20717 | -0.33566 |
| C                | 4.808561 | 2.967326 | -0.30785 | C                | -5.95353 | -1.87059 | -0.02392 |
| C                | 1.210332 | -0.53524 | 0.143528 | C                | -1.207   | -0.18777 | -0.25964 |
| C                | 0.356082 | 0.433776 | 0.709368 | C                | -0.75104 | -1.44903 | 0.181009 |
| C                | 0.940002 | 1.739494 | 1.186002 | C                | -1.73888 | -2.42348 | 0.770253 |
| C                | 0.65049  | -1.73583 | -0.33224 | C                | -0.285   | 0.691673 | -0.85552 |
| C                | -0.71541 | -1.99542 | -0.21017 | C                | 1.066163 | 0.357791 | -0.96649 |
| C                | -1.56707 | -1.04044 | 0.383059 | C                | 1.534859 | -0.87657 | -0.47305 |
| C                | -1.00776 | 0.163989 | 0.816808 | C                | 0.597899 | -1.7684  | 0.057853 |
| C                | 2.913632 | 3.765209 | 1.898476 | C                | -4.22669 | -3.49738 | 1.844128 |
| H                | 1.470942 | 2.337762 | -0.78477 | H                | -2.78013 | -2.64607 | -1.07068 |
| C                | -3.01564 | -1.34642 | 0.630404 | C                | 2.954637 | -1.34889 | -0.58806 |
| C                | -4.06234 | -0.47121 | 0.096316 | C                | 4.073565 | -0.57618 | -0.04761 |

|   |          |          |          |   |          |          |          |
|---|----------|----------|----------|---|----------|----------|----------|
| O | -3.29862 | -2.34153 | 1.324273 | O | 3.141052 | -2.46877 | -1.10833 |
| C | -5.42164 | -0.72138 | 0.459232 | C | 5.404406 | -1.05401 | -0.24764 |
| C | -6.44648 | 0.108514 | -0.02555 | C | 6.499112 | -0.32952 | 0.254833 |
| C | -6.13328 | 1.1714   | -0.8908  | C | 6.27778  | 0.848993 | 0.986791 |
| C | -4.79978 | 1.398804 | -1.28634 | C | 4.964288 | 1.300026 | 1.230051 |
| C | -3.79347 | 0.586841 | -0.79316 | C | 3.893611 | 0.594576 | 0.711694 |
| O | -5.76418 | -1.73654 | 1.262959 | O | 5.658999 | -2.18988 | -0.91106 |
| O | 3.370418 | -2.54795 | -0.07882 | O | -2.34288 | 2.543355 | -0.19395 |
| C | 3.647869 | -3.20162 | 1.166508 | C | -2.14854 | 3.228965 | 1.04926  |
| O | 5.979621 | -1.81424 | -0.35043 | O | -5.02921 | 2.965966 | -0.01895 |
| C | 6.115082 | -2.38226 | -1.65944 | C | -5.17034 | 3.568716 | -1.31168 |
| O | 6.66979  | 0.889392 | -0.58113 | O | -6.80362 | 0.805389 | -0.05961 |
| C | 7.626888 | 0.5846   | 0.440602 | C | -7.37569 | 1.412807 | 1.104984 |
| O | -1.3133  | -3.12688 | -0.67607 | O | 1.989514 | 1.159003 | -1.57681 |
| C | -0.50597 | -4.12545 | -1.27901 | C | 1.561054 | 2.388841 | -2.14118 |
| O | -7.76057 | -0.1455  | 0.266462 | O | 7.779975 | -0.79674 | 0.116668 |
| C | -8.15139 | 0.12637  | 1.615161 | C | 8.315932 | -0.72741 | -1.20735 |
| O | -7.18743 | 1.918811 | -1.30053 | O | 7.393948 | 1.479377 | 1.430324 |
| C | -6.95041 | 2.987911 | -2.20571 | C | 7.243168 | 2.654938 | 2.212888 |
| H | 3.883355 | 4.936145 | -0.28086 | H | -5.93701 | -4.04383 | -0.11433 |
| H | 3.173533 | 3.820212 | -1.44648 | H | -5.02838 | -3.25967 | -1.40598 |
| H | 5.47757  | 3.095416 | -1.1653  | H | -6.75052 | -1.66981 | -0.74747 |
| H | 5.406    | 3.246349 | 0.570456 | H | -6.45326 | -1.9233  | 0.952657 |
| H | 1.407977 | 1.597354 | 2.169636 | H | -1.94078 | -2.15573 | 1.816446 |
| H | 0.158783 | 2.497295 | 1.302689 | H | -1.33245 | -3.43956 | 0.76523  |
| H | 1.2994   | -2.46307 | -0.79371 | H | -0.64071 | 1.635498 | -1.23649 |
| H | -1.6576  | 0.90914  | 1.267725 | H | 0.948913 | -2.74357 | 0.382066 |
| H | 2.039947 | 3.725283 | 2.553623 | H | -3.31884 | -3.8535  | 2.337131 |
| H | 3.339314 | 4.769719 | 1.987784 | H | -5.00619 | -4.24483 | 2.022895 |
| H | 3.658591 | 3.047982 | 2.28429  | H | -4.5366  | -2.56206 | 2.342228 |
| H | -4.55601 | 2.201807 | -1.96996 | H | 4.787742 | 2.194645 | 1.813246 |
| H | -2.77077 | 0.760496 | -1.10643 | H | 2.886776 | 0.944848 | 0.903647 |
| H | 3.038024 | -2.77724 | 1.972529 | H | -1.66996 | 2.572223 | 1.78545  |
| H | 3.382813 | -4.25175 | 1.027859 | H | -1.4887  | 4.072386 | 0.834865 |
| H | 4.709549 | -3.12217 | 1.418655 | H | -3.09968 | 3.599552 | 1.44244  |
| H | 6.392631 | -1.61349 | -2.38957 | H | -5.87758 | 3.003252 | -1.92877 |
| H | 6.913695 | -3.1239  | -1.59157 | H | -5.55991 | 4.574601 | -1.14162 |
| H | 5.18575  | -2.8716  | -1.96828 | H | -4.20154 | 3.632059 | -1.81813 |
| H | 8.579359 | 0.989007 | 0.092195 | H | -8.4497  | 1.472901 | 0.91788  |
| H | 7.355302 | 1.068644 | 1.387197 | H | -7.1997  | 0.794935 | 1.99458  |
| H | 7.714434 | -0.49397 | 0.592846 | H | -6.97109 | 2.414914 | 1.268513 |
| H | -1.18634 | -4.93419 | -1.54866 | H | 2.454644 | 2.846295 | -2.56787 |
| H | -0.0076  | -3.7539  | -2.18339 | H | 0.819002 | 2.233101 | -2.93387 |

|                  |          |          |          |                  |          |          |          |
|------------------|----------|----------|----------|------------------|----------|----------|----------|
| H                | 0.252653 | -4.50649 | -0.58418 | H                | 1.137125 | 3.059363 | -1.38308 |
| H                | -9.21913 | -0.09529 | 1.670989 | H                | 9.338813 | -1.10367 | -1.13973 |
| H                | -7.60924 | -0.50848 | 2.322344 | H                | 7.743239 | -1.34954 | -1.90166 |
| H                | -7.98968 | 1.182563 | 1.865688 | H                | 8.336802 | 0.308537 | -1.56922 |
| H                | -7.92638 | 3.435492 | -2.39719 | H                | 8.255092 | 2.977724 | 2.460835 |
| H                | -6.28388 | 3.744892 | -1.77415 | H                | 6.736276 | 3.452157 | 1.654933 |
| H                | -6.52545 | 2.629894 | -3.15128 | H                | 6.690466 | 2.456074 | 3.139156 |
| H                | -4.9123  | -2.21963 | 1.459164 | H                | 4.765198 | -2.57508 | -1.13045 |
| <b>1 (6aS)-c</b> |          |          |          | <b>1 (6aS)-d</b> |          |          |          |
| C                | -4.54484 | 1.652131 | 0.08137  | C                | 4.742734 | 1.421261 | 0.056659 |
| C                | -3.15426 | 1.445115 | -0.00061 | C                | 3.391278 | 1.344251 | -0.313   |
| C                | -2.6322  | 0.131216 | -0.091   | C                | 2.662079 | 0.14888  | -0.15117 |
| C                | -3.53892 | -0.95819 | -0.06285 | C                | 3.353802 | -0.98142 | 0.359236 |
| C                | -4.9241  | -0.75568 | -0.02276 | C                | 4.692782 | -0.90222 | 0.762821 |
| C                | -5.41131 | 0.552206 | 0.076585 | C                | 5.387464 | 0.30714  | 0.600835 |
| C                | -2.98529 | -2.38841 | -0.1131  | C                | 2.595864 | -2.30858 | 0.497358 |
| N                | -3.94806 | -3.43011 | 0.267176 | N                | 3.456754 | -3.484   | 0.679176 |
| C                | -5.2005  | -3.22133 | -0.45956 | C                | 4.424285 | -3.21201 | 1.742436 |
| C                | -5.90352 | -1.91211 | -0.07349 | C                | 5.406351 | -2.08551 | 1.387398 |
| C                | -1.1779  | -0.16683 | -0.23414 | C                | 1.211251 | 0.01696  | -0.45637 |
| C                | -0.71219 | -1.44436 | 0.147487 | C                | 0.689641 | -1.27166 | -0.70198 |
| C                | -1.68914 | -2.45146 | 0.695798 | C                | 1.619846 | -2.45774 | -0.67169 |
| C                | -0.2563  | 0.734268 | -0.79833 | C                | 0.330575 | 1.113784 | -0.46476 |
| C                | 1.093971 | 0.4086   | -0.93246 | C                | -1.03255 | 0.94546  | -0.71707 |
| C                | 1.568434 | -0.84449 | -0.49758 | C                | -1.55686 | -0.34059 | -0.95464 |
| C                | 0.63585  | -1.75796 | 0.00004  | C                | -0.66901 | -1.42005 | -0.96612 |
| C                | -4.15888 | -3.61366 | 1.701708 | C                | 4.088742 | -4.00626 | -0.53114 |
| H                | -2.71519 | -2.59839 | -1.16098 | H                | 1.984639 | -2.24164 | 1.412314 |
| C                | 2.989581 | -1.30431 | -0.63973 | C                | -2.9952  | -0.61392 | -1.28712 |
| C                | 4.103295 | -0.55974 | -0.05152 | C                | -4.08169 | -0.22537 | -0.38784 |
| O                | 3.181679 | -2.38993 | -1.22616 | O                | -3.22629 | -1.24868 | -2.33705 |
| C                | 5.436886 | -1.01833 | -0.27565 | C                | -5.43174 | -0.44729 | -0.79661 |
| C                | 6.526181 | -0.32074 | 0.273954 | C                | -6.49444 | -0.0819  | 0.047049 |
| C                | 6.296704 | 0.810782 | 1.074491 | C                | -6.22427 | 0.469612 | 1.310451 |
| C                | 4.980372 | 1.241205 | 1.338636 | C                | -4.89345 | 0.673368 | 1.728961 |
| C                | 3.914745 | 0.563185 | 0.77501  | C                | -3.85324 | 0.32767  | 0.885552 |
| O                | 5.698801 | -2.11062 | -1.00639 | O                | -5.73452 | -1.00312 | -1.9776  |
| O                | -2.26536 | 2.481594 | 0.104584 | O                | 2.802421 | 2.49563  | -0.79859 |
| C                | -2.48787 | 3.704906 | -0.59752 | C                | 3.116197 | 2.790167 | -2.16624 |
| O                | -5.03275 | 2.932022 | 0.255274 | O                | 5.438987 | 2.597065 | -0.13327 |
| C                | -5.86366 | 3.431561 | -0.80295 | C                | 5.276038 | 3.543967 | 0.930243 |
| O                | -6.77706 | 0.747364 | 0.156048 | O                | 6.683505 | 0.38968  | 1.053915 |
| C                | -7.2486  | 1.104013 | 1.462419 | C                | 7.687582 | 0.582642 | 0.050089 |



|                  |          |          |          |                  |          |          |          |
|------------------|----------|----------|----------|------------------|----------|----------|----------|
| O                | 2.015666 | 1.236739 | -1.51122 | O                | -1.9193  | 1.982803 | -0.77705 |
| C                | 1.593904 | 2.500838 | -1.99493 | C                | -1.443   | 3.30307  | -0.56641 |
| O                | 7.809737 | -0.77325 | 0.111699 | O                | -7.79579 | -0.21376 | -0.36309 |
| C                | 8.350176 | -0.61423 | -1.20254 | C                | -8.29626 | -1.55337 | -0.36892 |
| O                | 7.408456 | 1.417822 | 1.55985  | O                | -7.31362 | 0.76581  | 2.06247  |
| C                | 7.249241 | 2.541245 | 2.414059 | C                | -7.11586 | 1.341412 | 3.34582  |
| H                | -5.86237 | -4.07686 | -0.28409 | H                | 4.96892  | -4.13422 | 1.974093 |
| H                | -4.96435 | -3.21234 | -1.53131 | H                | 3.858714 | -2.939   | 2.642472 |
| H                | -6.70707 | -1.68235 | -0.78138 | H                | 5.952737 | -1.75577 | 2.277273 |
| H                | -6.39695 | -2.02575 | 0.900974 | H                | 6.174077 | -2.45876 | 0.696353 |
| H                | -1.89907 | -2.22753 | 1.750559 | H                | 2.178436 | -2.51289 | -1.61595 |
| H                | -1.2712  | -3.4619  | 0.651069 | H                | 1.058387 | -3.3914  | -0.56894 |
| H                | -0.60617 | 1.695131 | -1.13536 | H                | 0.729022 | 2.099145 | -0.28351 |
| H                | 0.988117 | -2.74616 | 0.280546 | H                | -1.06734 | -2.40819 | -1.17705 |
| H                | -3.24744 | -3.98629 | 2.175333 | H                | 3.333907 | -4.4094  | -1.21058 |
| H                | -4.93083 | -4.37742 | 1.839933 | H                | 4.743165 | -4.83588 | -0.24545 |
| H                | -4.47778 | -2.7094  | 2.248876 | H                | 4.69597  | -3.277   | -1.09502 |
| H                | 4.797328 | 2.098251 | 1.973956 | H                | -4.67915 | 1.086172 | 2.706322 |
| H                | 2.905408 | 0.896386 | 0.984319 | H                | -2.83252 | 0.474201 | 1.217475 |
| H                | -3.13926 | 4.377467 | -0.03754 | H                | 2.756269 | 1.99409  | -2.82843 |
| H                | -1.50172 | 4.163089 | -0.71616 | H                | 2.598359 | 3.721164 | -2.40614 |
| H                | -2.91645 | 3.524397 | -1.59035 | H                | 4.193688 | 2.92679  | -2.29692 |
| H                | -6.74264 | 2.800009 | -0.94906 | H                | 5.637516 | 3.12966  | 1.878198 |
| H                | -6.17104 | 4.433829 | -0.49761 | H                | 5.877208 | 4.415095 | 0.661582 |
| H                | -5.30186 | 3.496789 | -1.74311 | H                | 4.226419 | 3.839752 | 1.02915  |
| H                | -8.33345 | 1.197304 | 1.381729 | H                | 8.643846 | 0.591468 | 0.576963 |
| H                | -7.00554 | 0.322292 | 2.192156 | H                | 7.682053 | -0.24383 | -0.67164 |
| H                | -6.8179  | 2.054465 | 1.792364 | H                | 7.544836 | 1.529949 | -0.47586 |
| H                | 2.487295 | 2.976297 | -2.40216 | H                | -2.31356 | 3.952029 | -0.66968 |
| H                | 0.843567 | 2.401281 | -2.78949 | H                | -1.01553 | 3.426381 | 0.43661  |
| H                | 1.184819 | 3.127904 | -1.19222 | H                | -0.68902 | 3.584299 | -1.31182 |
| H                | 9.372627 | -0.9951  | -1.15766 | H                | -9.33816 | -1.48687 | -0.6891  |
| H                | 7.77935  | -1.18714 | -1.93953 | H                | -7.73899 | -2.18225 | -1.07008 |
| H                | 8.372857 | 0.443989 | -1.49289 | H                | -8.25594 | -1.99284 | 0.635893 |
| H                | 8.258684 | 2.85186  | 2.686501 | H                | -8.11382 | 1.501575 | 3.755771 |
| H                | 6.741298 | 3.369971 | 1.905116 | H                | -6.55599 | 0.671032 | 4.009727 |
| H                | 6.693296 | 2.282223 | 3.323369 | H                | -6.59336 | 2.303619 | 3.281098 |
| H                | 4.807364 | -2.48611 | -1.25073 | H                | -4.85898 | -1.24237 | -2.39024 |
| <b>1 (6aS)-e</b> |          |          |          | <b>1 (6aS)-f</b> |          |          |          |
| C                | -4.59805 | 1.604673 | 0.12635  | C                | -4.55947 | 1.659738 | -0.0335  |
| C                | -3.21181 | 1.385324 | 0.032823 | C                | -3.17444 | 1.438749 | -0.11551 |
| C                | -2.66916 | 0.091251 | -0.05523 | C                | -2.64824 | 0.130419 | -0.11431 |
| C                | -3.56971 | -1.00203 | 0.02885  | C                | -3.55111 | -0.9524  | 0.029946 |

|   |          |          |          |   |          |          |          |
|---|----------|----------|----------|---|----------|----------|----------|
| C | -4.95025 | -0.80347 | 0.101155 | C | -4.93651 | -0.74623 | 0.042094 |
| C | -5.47186 | 0.506757 | 0.150312 | C | -5.4333  | 0.564128 | -0.01166 |
| C | -3.00175 | -2.42714 | -0.00976 | C | -2.99031 | -2.3779  | 0.108226 |
| N | -3.93463 | -3.46689 | 0.441462 | N | -3.94298 | -3.37438 | 0.61364  |
| C | -5.21643 | -3.29002 | -0.24208 | C | -5.20136 | -3.25172 | -0.12386 |
| C | -5.91571 | -1.97142 | 0.118235 | C | -5.90879 | -1.90762 | 0.107254 |
| C | -1.2203  | -0.18448 | -0.23859 | C | -1.19957 | -0.1711  | -0.26802 |
| C | -0.72125 | -1.44961 | 0.139297 | C | -0.71189 | -1.40275 | 0.219611 |
| C | -1.66486 | -2.4628  | 0.735707 | C | -1.6698  | -2.36037 | 0.882962 |
| C | -0.34074 | 0.736106 | -0.83714 | C | -0.31317 | 0.689277 | -0.94015 |
| C | 1.011635 | 0.436897 | -1.01137 | C | 1.038221 | 0.367487 | -1.08196 |
| C | 1.524399 | -0.80481 | -0.58344 | C | 1.541126 | -0.83373 | -0.5419  |
| C | 0.62769  | -1.73535 | -0.04946 | C | 0.636998 | -1.70994 | 0.066423 |
| C | -4.0885  | -3.60198 | 1.888971 | C | -4.14224 | -3.38859 | 2.061685 |
| H | -2.78055 | -2.66052 | -1.06408 | H | -2.74711 | -2.69227 | -0.91974 |
| C | 2.947542 | -1.23979 | -0.77419 | C | 2.963758 | -1.28977 | -0.6854  |
| C | 4.070927 | -0.46325 | -0.24742 | C | 4.086359 | -0.47655 | -0.21638 |
| O | 3.137795 | -2.33342 | -1.3461  | O | 3.152263 | -2.42774 | -1.1633  |
| C | 5.402668 | -0.89113 | -0.53442 | C | 5.418366 | -0.93285 | -0.45433 |
| C | 6.500051 | -0.16319 | -0.04382 | C | 6.515194 | -0.17138 | -0.01598 |
| C | 6.283814 | 0.966289 | 0.762501 | C | 6.297399 | 1.023624 | 0.689358 |
| C | 4.971914 | 1.381992 | 1.068583 | C | 4.984966 | 1.46987  | 0.946289 |
| C | 3.896902 | 0.671529 | 0.56567  | C | 3.910842 | 0.724049 | 0.495712 |
| O | 5.656247 | -1.98354 | -1.26746 | O | 5.672603 | -2.08359 | -1.09169 |
| O | -2.39648 | 2.504637 | 0.047832 | O | -2.35772 | 2.545184 | -0.22725 |
| C | -2.10943 | 2.991552 | 1.365133 | C | -1.94908 | 3.115881 | 1.01505  |
| O | -5.0853  | 2.885742 | 0.295723 | O | -5.01591 | 2.957734 | -0.04306 |
| C | -4.93164 | 3.769666 | -0.82268 | C | -5.7593  | 3.361986 | 1.113845 |
| O | -6.82802 | 0.578763 | 0.284114 | O | -6.80061 | 0.749054 | 0.006954 |
| C | -7.57356 | 1.689807 | -0.21183 | C | -7.34843 | 1.306097 | -1.19683 |
| O | 1.894788 | 1.279234 | -1.62524 | O | 1.928363 | 1.146756 | -1.76377 |
| C | 1.419878 | 2.515137 | -2.13599 | C | 1.461363 | 2.334793 | -2.38584 |
| O | 7.782422 | -0.51479 | -0.37726 | O | 7.798954 | -0.55404 | -0.30642 |
| C | 8.286981 | -1.67092 | 0.296398 | C | 8.289495 | -1.6598  | 0.456404 |
| O | 7.404228 | 1.587165 | 1.209614 | O | 7.416738 | 1.675363 | 1.092617 |
| C | 7.260223 | 2.747302 | 2.016128 | C | 7.271992 | 2.902196 | 1.793469 |
| H | -5.86544 | -4.14149 | -0.00839 | H | -5.86054 | -4.08132 | 0.155377 |
| H | -5.0218  | -3.32194 | -1.32177 | H | -4.97117 | -3.36996 | -1.19037 |
| H | -6.74121 | -1.77447 | -0.57445 | H | -6.70876 | -1.76661 | -0.62776 |
| H | -6.38455 | -2.04472 | 1.108419 | H | -6.41157 | -1.90558 | 1.083158 |
| H | -1.82795 | -2.23275 | 1.797517 | H | -1.85258 | -2.0426  | 1.918628 |
| H | -1.23924 | -3.46965 | 0.681752 | H | -1.24825 | -3.3696  | 0.919813 |
| H | -0.73045 | 1.685423 | -1.16908 | H | -0.69777 | 1.607165 | -1.35615 |

|   |          |          |          |   |          |          |          |
|---|----------|----------|----------|---|----------|----------|----------|
| H | 1.011037 | -2.71397 | 0.224042 | H | 1.01356  | -2.6629  | 0.426266 |
| H | -3.15615 | -3.95178 | 2.338958 | H | -3.22541 | -3.70144 | 2.567412 |
| H | -4.84791 | -4.36601 | 2.083192 | H | -4.91062 | -4.13221 | 2.295775 |
| H | -4.39431 | -2.68159 | 2.41577  | H | -4.45912 | -2.42653 | 2.50048  |
| H | 4.799554 | 2.243682 | 1.700661 | H | 4.811462 | 2.38324  | 1.500555 |
| H | 2.891167 | 0.988382 | 0.81368  | H | 2.904654 | 1.065612 | 0.70633  |
| H | -1.56288 | 2.240408 | 1.946921 | H | -1.37051 | 2.399541 | 1.611284 |
| H | -1.4829  | 3.87695  | 1.237386 | H | -1.31948 | 3.973986 | 0.770017 |
| H | -3.03111 | 3.266992 | 1.887546 | H | -2.81105 | 3.46071  | 1.597138 |
| H | -5.46899 | 3.388669 | -1.70028 | H | -5.15403 | 3.25818  | 2.023156 |
| H | -5.37178 | 4.721493 | -0.51793 | H | -6.00098 | 4.41575  | 0.962137 |
| H | -3.87797 | 3.91083  | -1.07262 | H | -6.67814 | 2.780667 | 1.228139 |
| H | -7.47416 | 2.566169 | 0.43038  | H | -8.42622 | 1.374494 | -1.03721 |
| H | -7.26945 | 1.94984  | -1.2325  | H | -6.9377  | 2.299566 | -1.39882 |
| H | -8.61321 | 1.354993 | -0.22727 | H | -7.14939 | 0.650331 | -2.05292 |
| H | 2.286848 | 3.004129 | -2.58207 | H | 2.332462 | 2.776778 | -2.87102 |
| H | 0.651472 | 2.365939 | -2.90452 | H | 0.694346 | 2.120526 | -3.13988 |
| H | 1.011237 | 3.154134 | -1.34292 | H | 1.05407  | 3.044219 | -1.65459 |
| H | 9.311969 | -1.80463 | -0.05576 | H | 9.319618 | -1.81967 | 0.131203 |
| H | 8.296785 | -1.51994 | 1.38339  | H | 8.282409 | -1.43129 | 1.529797 |
| H | 7.698712 | -2.56082 | 0.05201  | H | 7.702908 | -2.56401 | 0.267014 |
| H | 8.274386 | 3.078134 | 2.243481 | H | 8.285963 | 3.247544 | 1.998992 |
| H | 6.730426 | 3.546602 | 1.483655 | H | 6.749979 | 3.65389  | 1.18892  |
| H | 6.733352 | 2.527831 | 2.95309  | H | 6.737246 | 2.767668 | 2.741967 |
| H | 4.764282 | -2.38583 | -1.46035 | H | 4.780628 | -2.49663 | -1.2594  |

For the calculations of  $^{13}\text{C}$  NMR chemical shifts, B3LYP/6-31G (d, p) method was used to optimize the selected conformations. For all optimized structures, vibrational spectra were calculated to ensure that no imaginary frequencies for energy minimum were obtained. NMR calculations were performed at the levels of mPW1PW91/6-31G (d, p) with the gauge-independent atomic orbital (GIAO) method.<sup>2</sup> The solvent effect was considered by using chloroform in the calculations to resemble the experimental condition. The polarized continuum model (PCM) of Tomasi et al. was used.<sup>3</sup> These calculated  $^{13}\text{C}$  NMR chemical shifts were analyzed by subtracting the isotopic shifts for TMS calculated with the same methods.<sup>4</sup> Different conformers for structure **1** were considered. The  $^{13}\text{C}$  NMR chemical shifts in each compound were considered as the average values of the same atoms in the different conformers. The average values

were obtained by the Boltzmann distributions, using the relative Gibbs free energies as weighting factors.<sup>5</sup> These differences  $\Delta\delta$  were determined by subtracting the experimental chemical shifts  $\delta_{\text{exptl}}$  from the calculated chemical shifts  $\delta_{\text{calcd}}$  (see Table S1).

## **2. Antibacterial assays**

### **2.1 Microorganism strains and growth conditions:**

The microorganisms used in antibacterial assays were obtained from the American Type Culture Collection (ATCC) (*Staphylococcus aureus* ATCC 25922, *Escherichia coli* ATCC 8739, *Bacillus subtilis* ATCC 6633, *Candida albicans* ATCC2002 and *Trichophyton rubrum* ATCC 28188. The culture media: Lysogeny Broth (LB, Conda) was used for culturing bacteria and Salouraud liquid medium broth for fungus, while Mueller Hinton Broth (MHB, Conda) was used for the determination of minimum inhibitory.

### **2.2 Determination of minimum inhibitory concentration (MIC):**

The inocula of bacteria were prepared from 24 h old agar cultures, were incubated to logarithmic phase. Berberine have long been used clinically for infection diseases, was used as positive reference substances. Finally, to measure the MIC value of compounds by the broth microdilution method in 96-well micro-titre plates as described in the literature.<sup>6</sup> The MIC was defined as the lowest concentration without any colony growth after and incubating fungus at 28°C for 16 h, respectively. All tests were performed in thrice, the values as shown in Table 2.

## **3. Cytotoxic assays**

### **3.1 Cell lines and cultures**

Human normal cell lines 293T and GES cells were established from Kunming Institute of Zoology, and were cultured in DMEM complete medium.

### **3.2 Cell viability assay by MTS method**

The human normal cell 293T and GES were seeded on laminin pre-coated 96-well-plate with 20,000 cells / well. Compounds **1**, **3** and the positive group were added with a serial dilution (60, 30, 15, 7.5, 3.75, 1.875, 0.937, 0.468  $\mu\text{g/ml}$ ) and cultured in cell incubator for 72 h. MTS reagent was diluted 1:5 with fresh medium and subsequently the fresh medium was added with 100  $\mu\text{L/well}$ . The cells were incubated for 1.5 h. Absorbance was measured by Hybrid Reader (BioTek Synergy H1) at 490 nm. The half-maximal inhibitory concentration ( $\text{IC}_{50}$ ) was measured and calculated by Graph Pad Prism 5 software.

#### **4. Antibacterial Kinetics Experiment**

The bacteria solution of *Staphylococcus aureus* was prepared from 24 h old agar cultures, was incubated to logarithmic phase. 0.9% sodium chloride solution as negative control. Then three different concentrations of compound **1** (1 $\times$  MIC, 5 $\times$  MIC and 10 $\times$  MIC) were added into tubes containing bacterial inoculum roughly  $1 \times 10^5$  CFU/ML. All samples were incubated at 37 $^{\circ}\text{C}$  and 180 rpm for 0 min, 1 min, 10 min, 30 min, 1 h and 3 h, followed 10  $\mu\text{L}$  samples were collected from each tube for colony counting were diluted 500 times, after 50  $\mu\text{L}$  diluted bacterial juice samples were collected from different time points, coated on LB plates, at 37 $^{\circ}\text{C}$  incubated for 24 h, count the colonies.<sup>7</sup> At least, two replications were performed for each sample.

#### **5. Scanning Electron Microscopy (SEM)**

According to the previous method, *S. aureus* was grown to the exponential-phase in lysogeny broth medium and then centrifuged at 1000 rpm for 5 min. The pellet was then washed with PBS twice and resuspended in LB medium. Compound **1** (10  $\times$  MIC) was incubated with *S. aureus* at 37  $^{\circ}\text{C}$  for 1h and then centrifuged at 1000 rpm for 10 min. Negative control group received the same volume of vehicle. The pellet was then washed with PBS twice and resuspended in 2.5% glutaraldehyde solution at 4  $^{\circ}\text{C}$  for 2 h. Then the *S. aureus* were centrifuged (2000 rpm for 0 min) and washed with PBS. The pellet was then fixed in 1% osmium tetroxide in PBS for 1 h. Cells were rinsed with same buffer, dehydrated in a grade series of ethanol, frozen in liquid

nitrogen-cooled tert-butyl alcohol, and then vacuum-dried overnight. The samples were mounted onto aluminum stubs. After sputtercoating with gold, they were analyzed by Hitachi S-3000N Scanning Electron Microscope.

## 6. SYTOX Green Assay

The method<sup>8-9</sup> was used to determine the membrane integrity of *S. aureus* after treated by compound **1**. Briefly, collected the exponential-phase *S. aureus* was grown in lysogeny broth medium and then centrifuged at 1000rpm for 10 min. The bacterium pellet was then washed twice, resuspended in PBS (10 mM, pH 7.4) give a cell density of  $10^5$  CFU/mL, and incubated with SYTOX Green nucleic acid stain at a final concentration of 0.1  $\mu$ M at 37 °C for 15 min on a shaking table. SYTOX Green-treated *S. aureus* were loaded into a FlexStation microplate reader (Molecular Devices, Sunnyvale, CA), and test samples were added robotically. One hour in the dark, then monitoring was initiated, and the fluorescence of each well was recorded every 2 min using an excitation of 488 nm and emission of 530 nm. Results were determined as relative fluorescence units (RFU).

## 7. DAPI Staining Assay

The compound **1** was diluted into the concentration of 5 $\times$  MIC with lysogeny broth medium and added into the bacteria suspension at final concentration of  $10^5$  CFU/mL. Physiological saline group was used as control. The cultures were incubated at 37 °C and 180 rpm with shaking table for 24 h. Then 1.0 mL suspension was mixed with 1  $\mu$ g/mL 2-(4-amidinophenyl)-1H-indole-6-carboxamide (DAPI), after incubated at room temperature under the dark for 10 min. A small drop of the mixture was dispersed on the glass slide to observe DNA fluorescence intensity by Olympus. Japan FV1000.

### Reference

1 Gaussian 09, Revision C.01, M. J. Frisch, G. W. Trucks, H. B. Schlegel, G. E. Scuseria, M. A. Robb, J. R. Cheeseman, G. Scalmani, V. Barone, B. Mennucci, G. A. Petersson, H. Nakatsuji, M. Caricato, X. Li, H. P. Hratchian, A. F. Izmaylov, J. Bloino, G. Zheng, J. L. Sonnenberg, M. Hada, M. Ehara, K. Toyota, R. Fukuda, J. Hasegawa, M. Ishida, T. Nakajima,

Y. Honda, O. Kitao, H. Nakai, T. Vreven, J. A. Montgomery, Jr., J. E. Peralta, F. Ogliaro, M. Bearpark, J. J. Heyd, E. Brothers, K. N. Kudin, V. N. Staroverov, T. Keith, R. Kobayashi, J. Normand, K. Raghavachari, A. Rendell, J. C. Burant, S. S. Iyengar, J. Tomasi, M. Cossi, N. Rega, J. M. Millam, M. Klene, J. E. Knox, J. B. Cross, V. Bakken, C. Adamo, J. Jaramillo, R. Gomperts, R. E. Stratmann, O. Yazyev, A. J. Austin, R. Cammi, C. Pomelli, J. W. Ochterski, R. L. Martin, K. Morokuma, V. G. Zakrzewski, G. A. Voth, P. Salvador, J. J. Dannenberg, S. Dapprich, A. D. Daniels, O. Farkas, J. B. Foresman, J. V. Ortiz, J. Cioslowski, and D. J. Fox, Gaussian, Inc., Wallingford CT, 2010.

2 GaussView, Version 5, Dennington, R.; Keith, T.; Millam, J. Semichem Inc., Shawnee Mission, KS, 2009.

3 Smith, S. G.; Goodman, J. M. *J. Am. Chem. Soc.* **2010**, *132*, 12946–12959.

4 (a) Miertus, S.; Scrocc, E.; Tomasi, J. J. *Chem. Phys.* 1981, *55*, 117. (b) Miertus, S.; Tomasi, J. J. *Chem. Phys.* 1982, *65*, 239. (c) Cossi, M.; Barone, V.; Cammi, R.; Tomasi, *J. Chem. Phys. Lett.* **1996**, *255*, 327-335.

5 Tähtinen, P.; Bagno, A.; Klika, K. D.; Pihlaja, K. *J. Am. Chem. Soc.* **2003**, *125*, 4609–4618.

6 C. Orasch, O. Marchetti, J. Garbino, J. Schrenzel, S. Zimmerli, K. Mühlethaler, G. Pfyffer, C. Ruef, J. Fehr, R. Zbinden, *Clin. Microbiol. Infect.* **2014**, *20*, 698-705.

7 Roth, B. L.; Poot, M.; Yue, S. T.; Millard, P. J. *Appl. Environ. Microb.* **1997**, *63*, 2421-2431.

8 Ling, L. L.; Schneider, T.; Peoples, A. J.; Spoering, A. L.; Engels, I.; Conlon, B. P.; Mueller, A.; Schäberle, T. F.; Hughes, D. E.; Epstein, S. *Nature* **2015**, *520*, 455-459.

9 Sochacki, K. A.; Barns, K. J.; Bucki, R.; Weisshaar, J. C. *Proc Natl Acad Sci U S A* **2011**, *108*, 6347-6348.

Figure S2. HREIMS spectrum of thalfoetine A (1)

Formula Predictor Report - wtfir-29a.lcd

Data File: E:\DATA\2017\1218\wtfir-29a.lcd

| Elmt | Val. | Min | Max | Elmt | Val. | Min | Max | Elmt | Val. | Min | Max | Use Adduct |
|------|------|-----|-----|------|------|-----|-----|------|------|-----|-----|------------|
| H    | 1    | 0   | 100 | O    | 2    | 0   | 50  | Cl   | 1    | 0   | 0   | H          |
| C    | 4    | 0   | 50  | F    | 1    | 0   | 0   | Br   | 1    | 0   | 0   |            |
| N    | 3    | 0   | 10  | S    | 2    | 0   | 0   | I    | 3    | 0   | 0   |            |

Error Margin (ppm): 5  
 HC Ratio: unlimited  
 Max Isotopes: all  
 MSn Iso RI (%): 75.00

DBE Range: -2.0 - 100.0  
 Apply N Rule: yes  
 Isotope RI (%): 1.00  
 MSn Logic Mode: AND

Electron Ions: both  
 Use MSn Info: yes  
 Isotope Res: 10000  
 Max Results: 10

Event#: 1 MS(E+) Ret. Time : 0.490 Scan# : 99

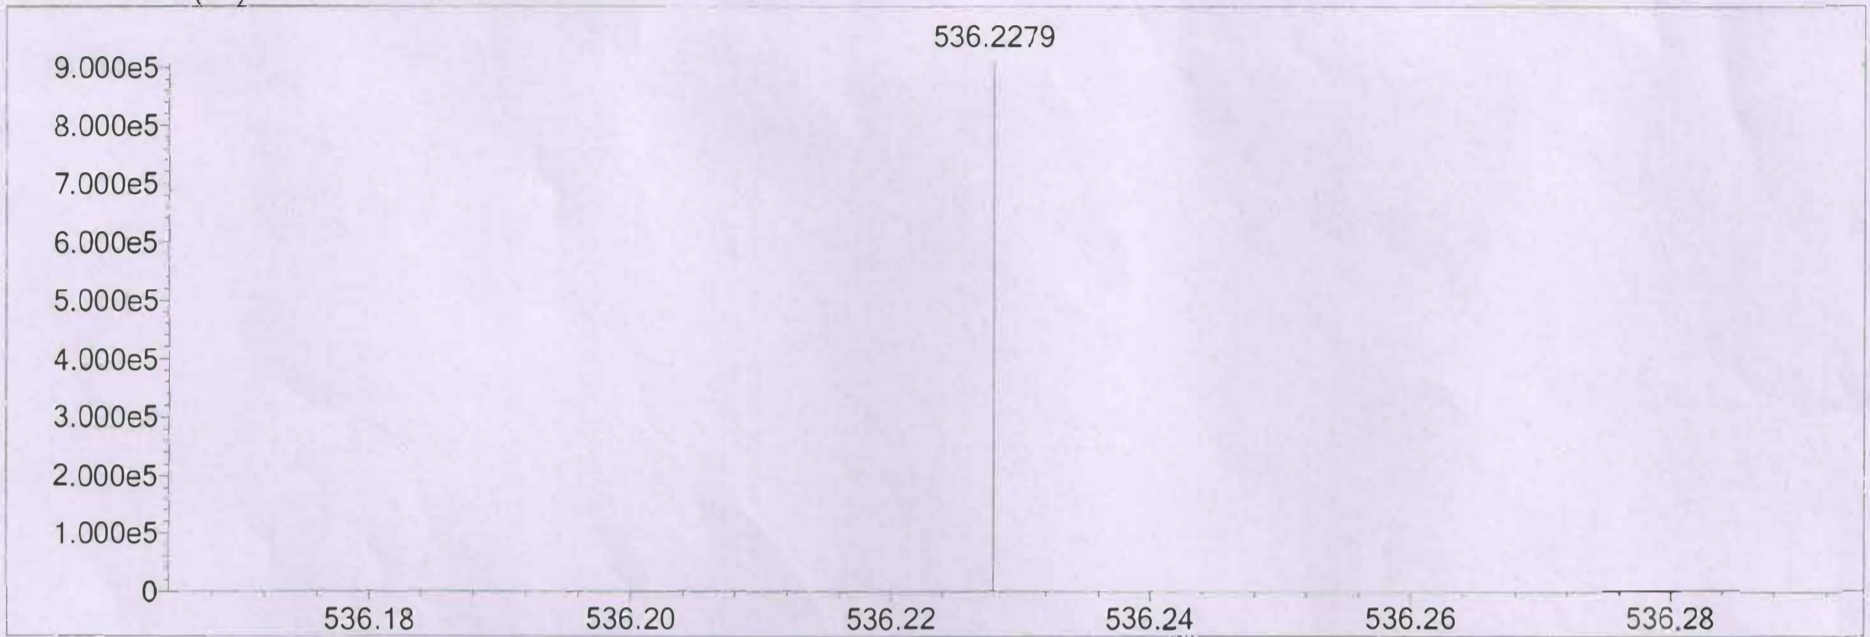

Measured region for 536.2279 m/z

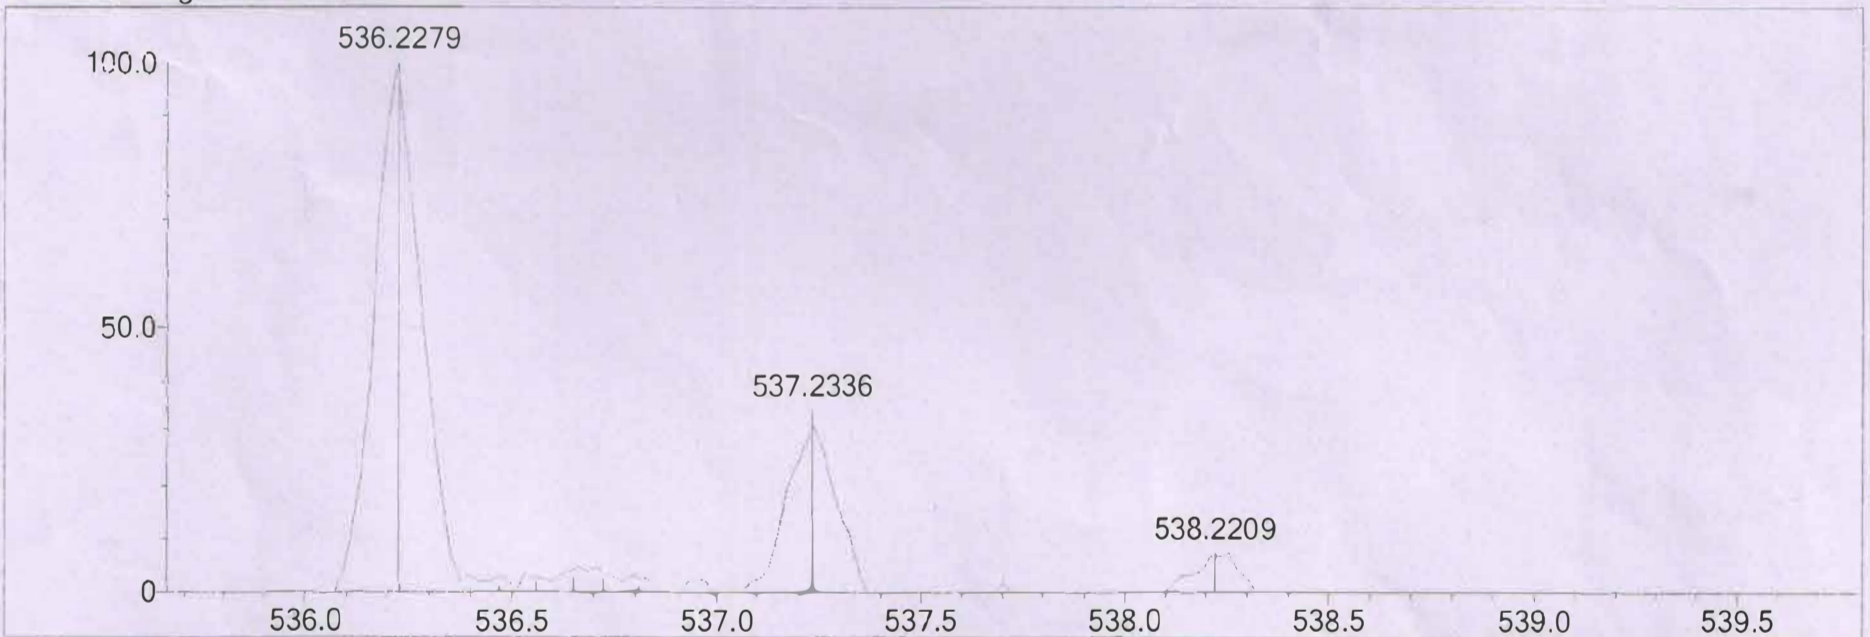

C30 H33 N O8 [M+H]<sup>+</sup> : Predicted region for 536.2279 m/z

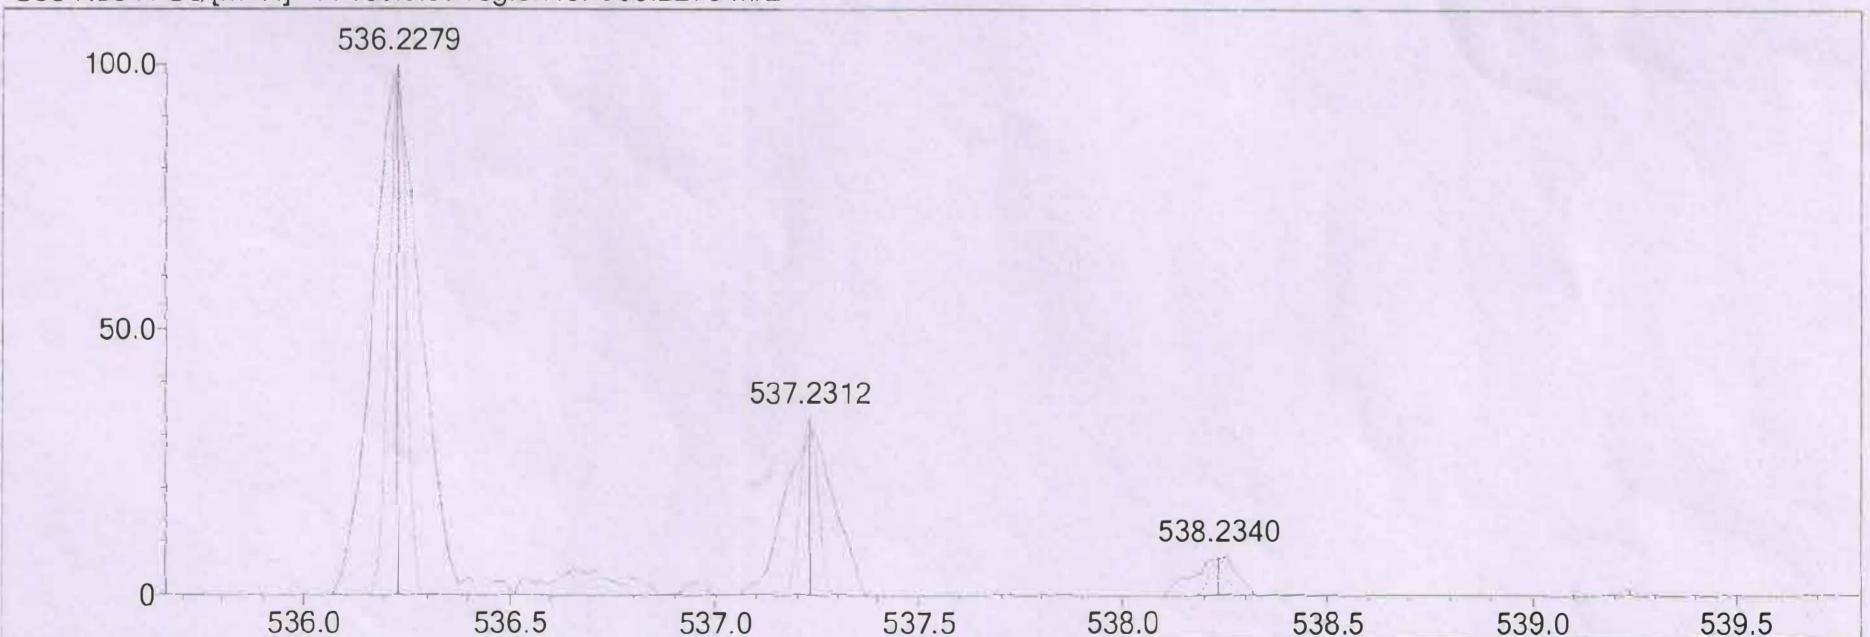

| Formula (M)  | Ion                | Meas. m/z | Pred. m/z | Df. (mDa) | Df. (ppm) | DBE  |
|--------------|--------------------|-----------|-----------|-----------|-----------|------|
| C30 H33 N O8 | [M+H] <sup>+</sup> | 536.2279  | 536.2279  | 0.0       | 0.00      | 15.0 |



Figure S3. IR spectrum of thalfoetine A (1)

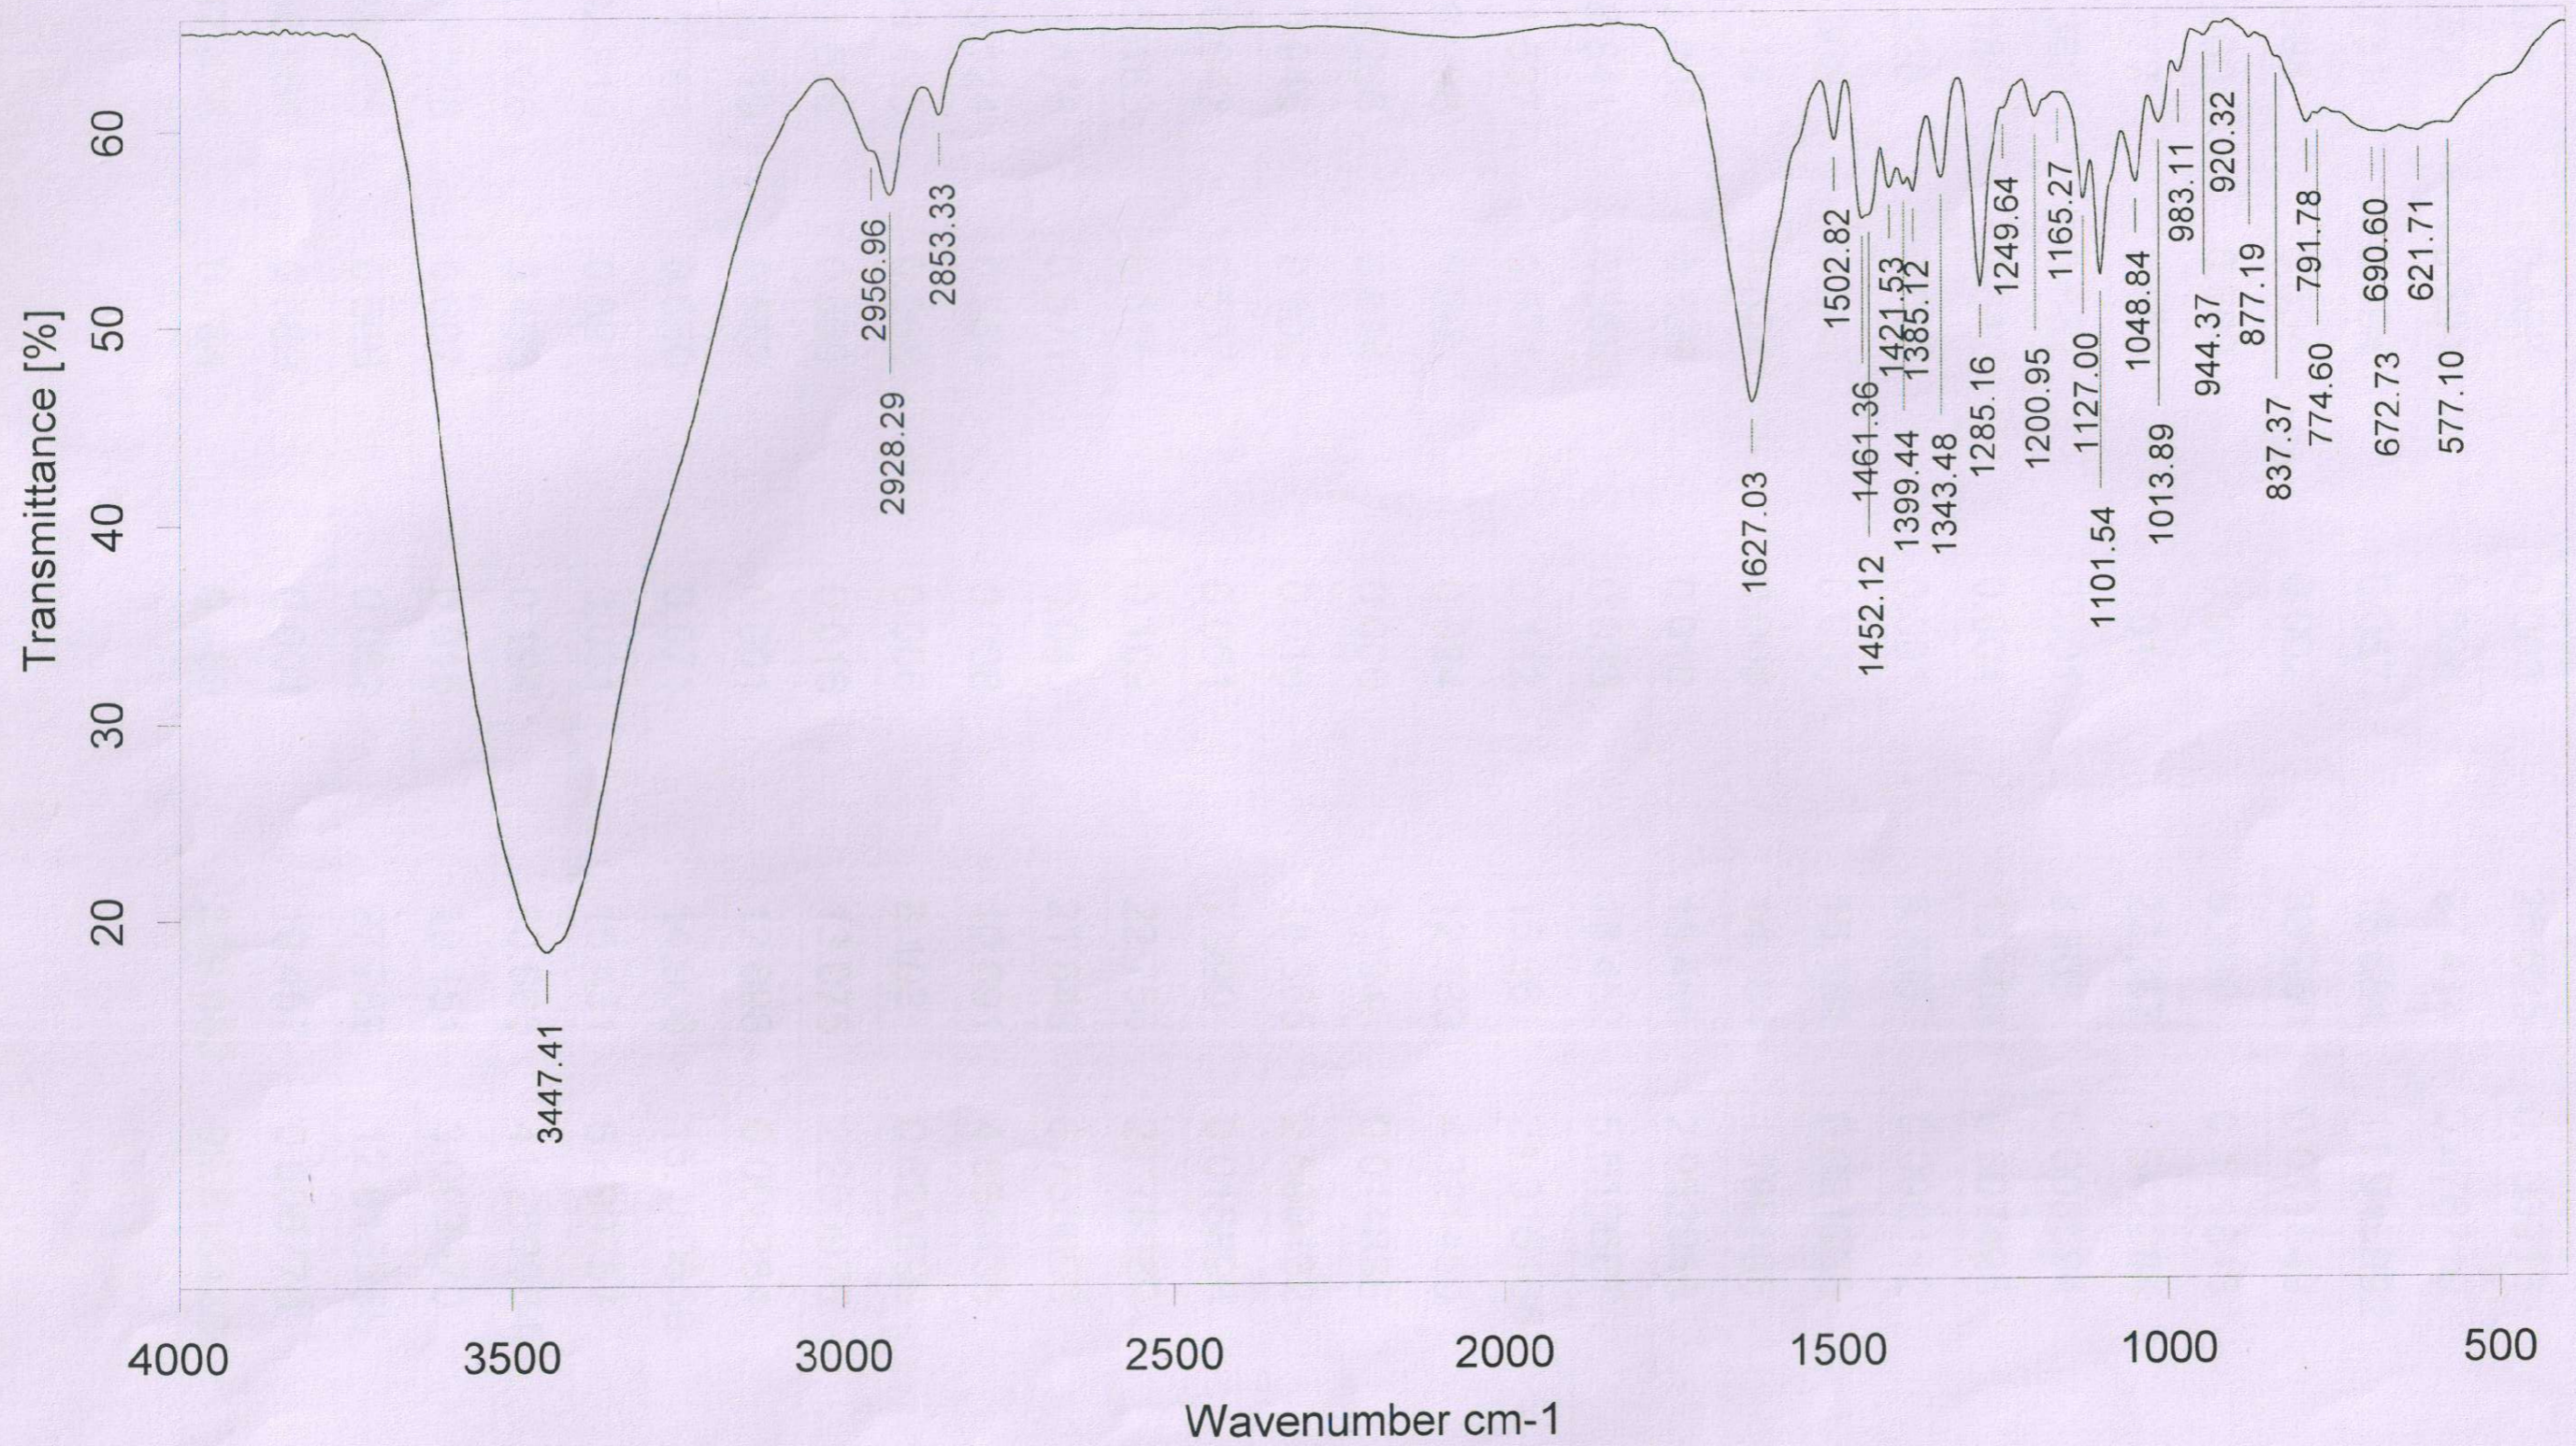

|                       |                                     |                                 |
|-----------------------|-------------------------------------|---------------------------------|
| Sample : wtflr-29a    | Frequency Range : 399.246 - 3996.32 | Measured on : 28/03/2018        |
| Technique : KBr       | Resolution : 4                      | Instrument : Tensor27           |
| Filename : 180328IR.3 | Zerofilling : 2                     | Sample Scans : 16               |
|                       |                                     | Acquisition : Double Sided, For |

Figure S4. UV spectrum of thalfoetine A (1)

SHIMADZU UV-2401PC

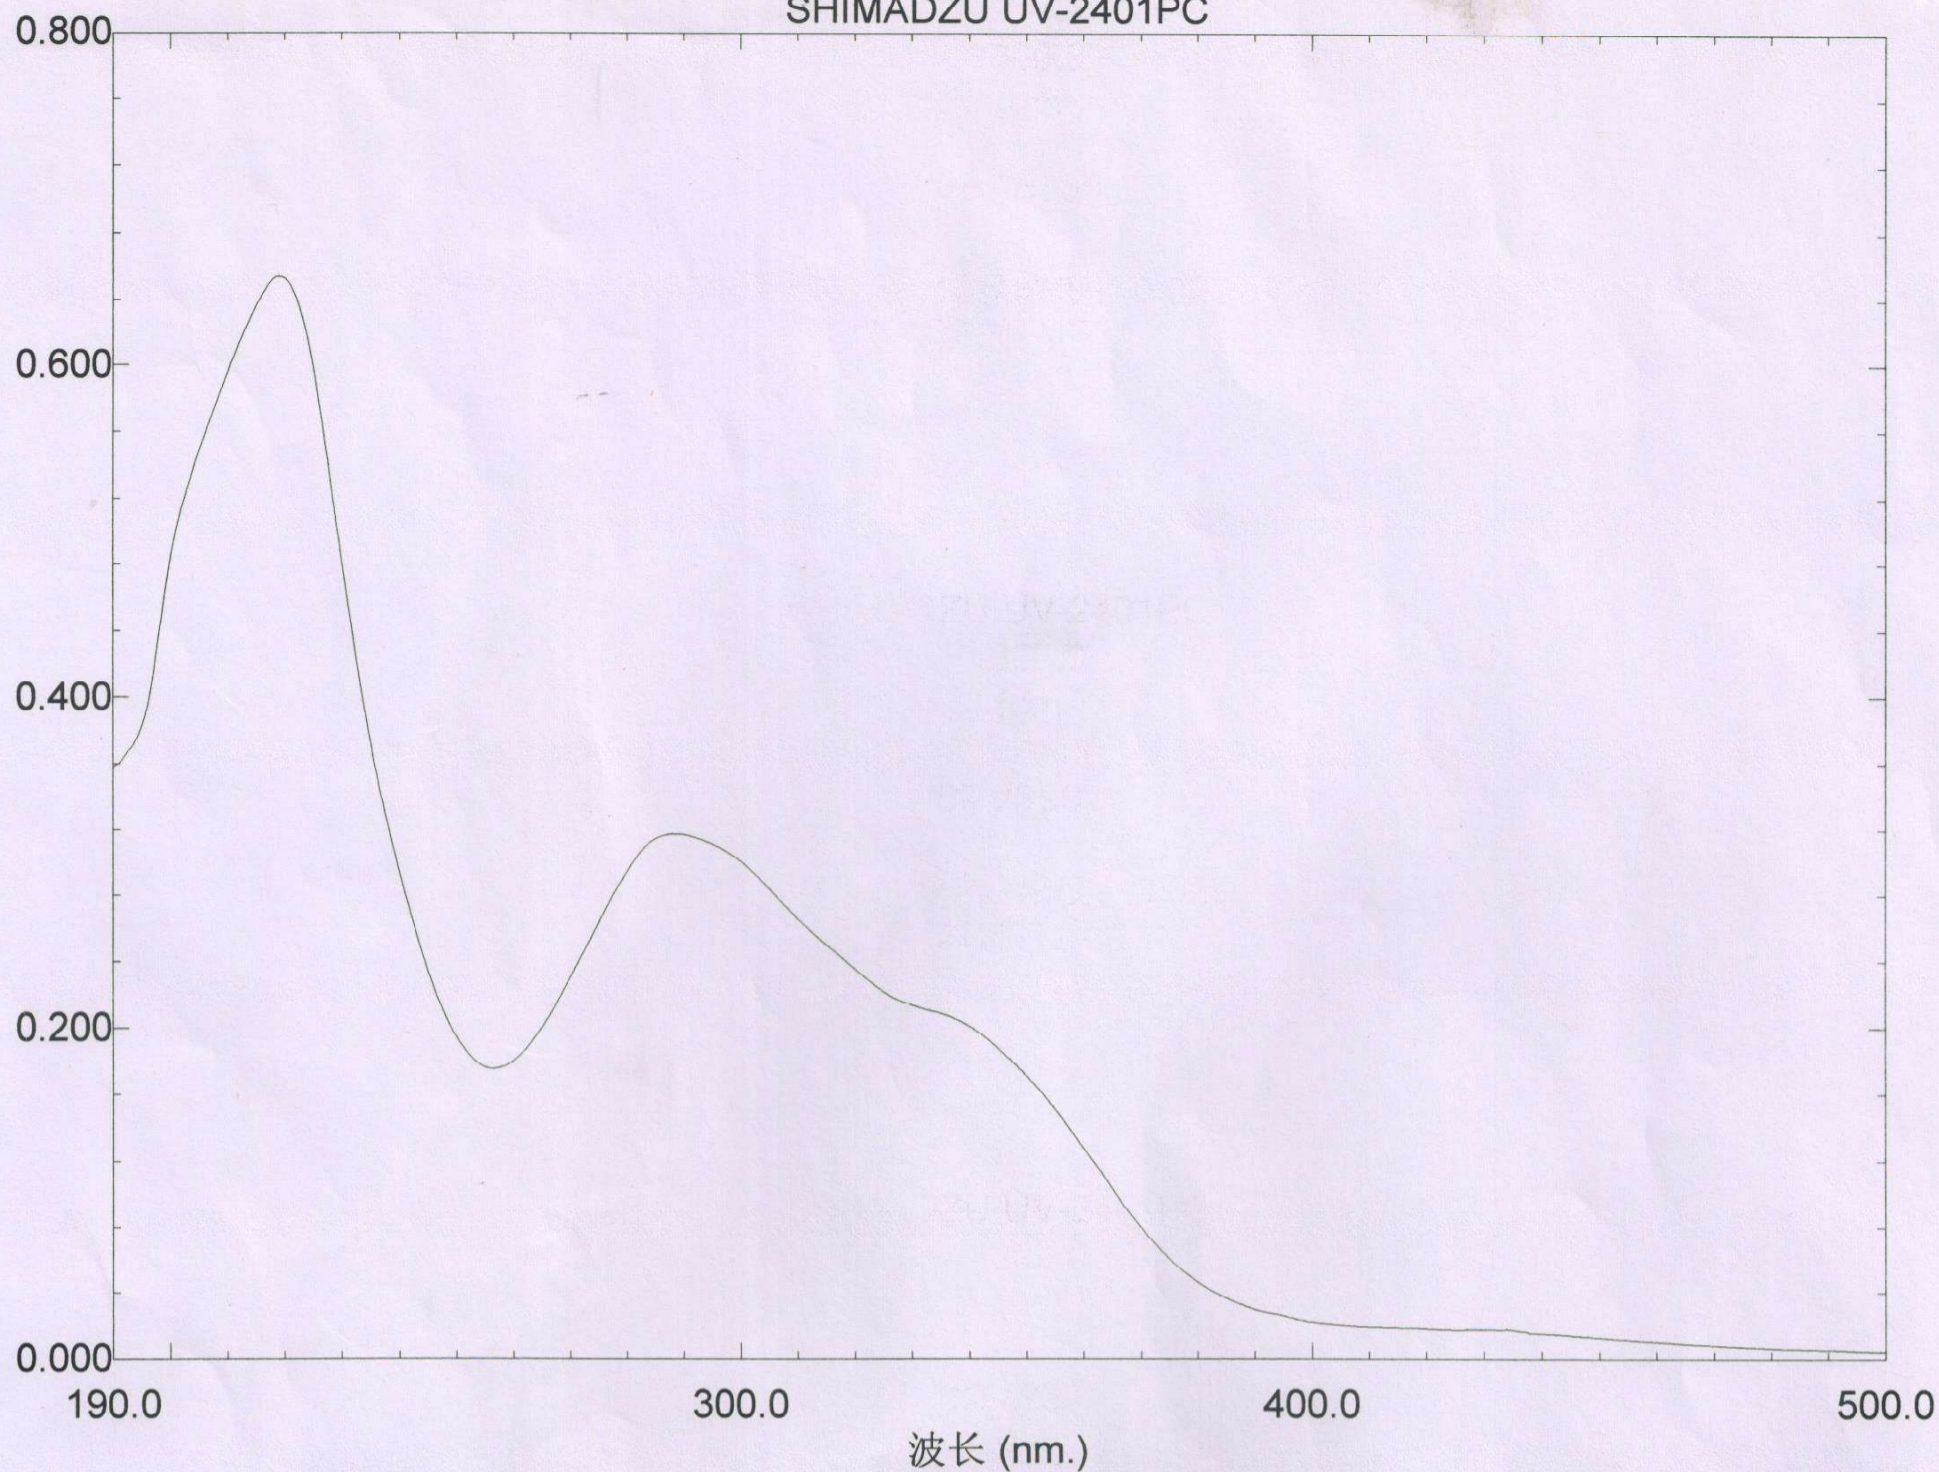

文件名: 18012901  
样品名称: WTFLR-29A

18012901

创建于: 11:20 18-01-29  
数据: 原始

样品浓度: 0.0075毫克/毫升  
溶剂: 甲醇

测量模式: Abs.  
扫描速度: 中速  
狭缝: 5.0  
采样间隔: 0.5

| 否. | 波长 (nm.) | Abs.   |
|----|----------|--------|
| 1  | 219.00   | 0.6538 |
| 2  | 289.00   | 0.3174 |
| 3  | 329.50   | 0.2140 |

Figure S5. <sup>1</sup>H NMR spectrum of thalfoetine A (1) in CDCl<sub>3</sub> (600 MHz)

wf1r29a.082.001.1r.esp

M01(s)

CHLOROFORM d

M08(s)

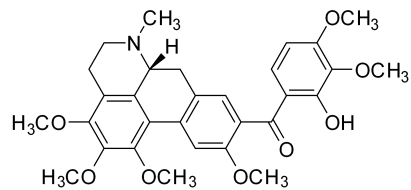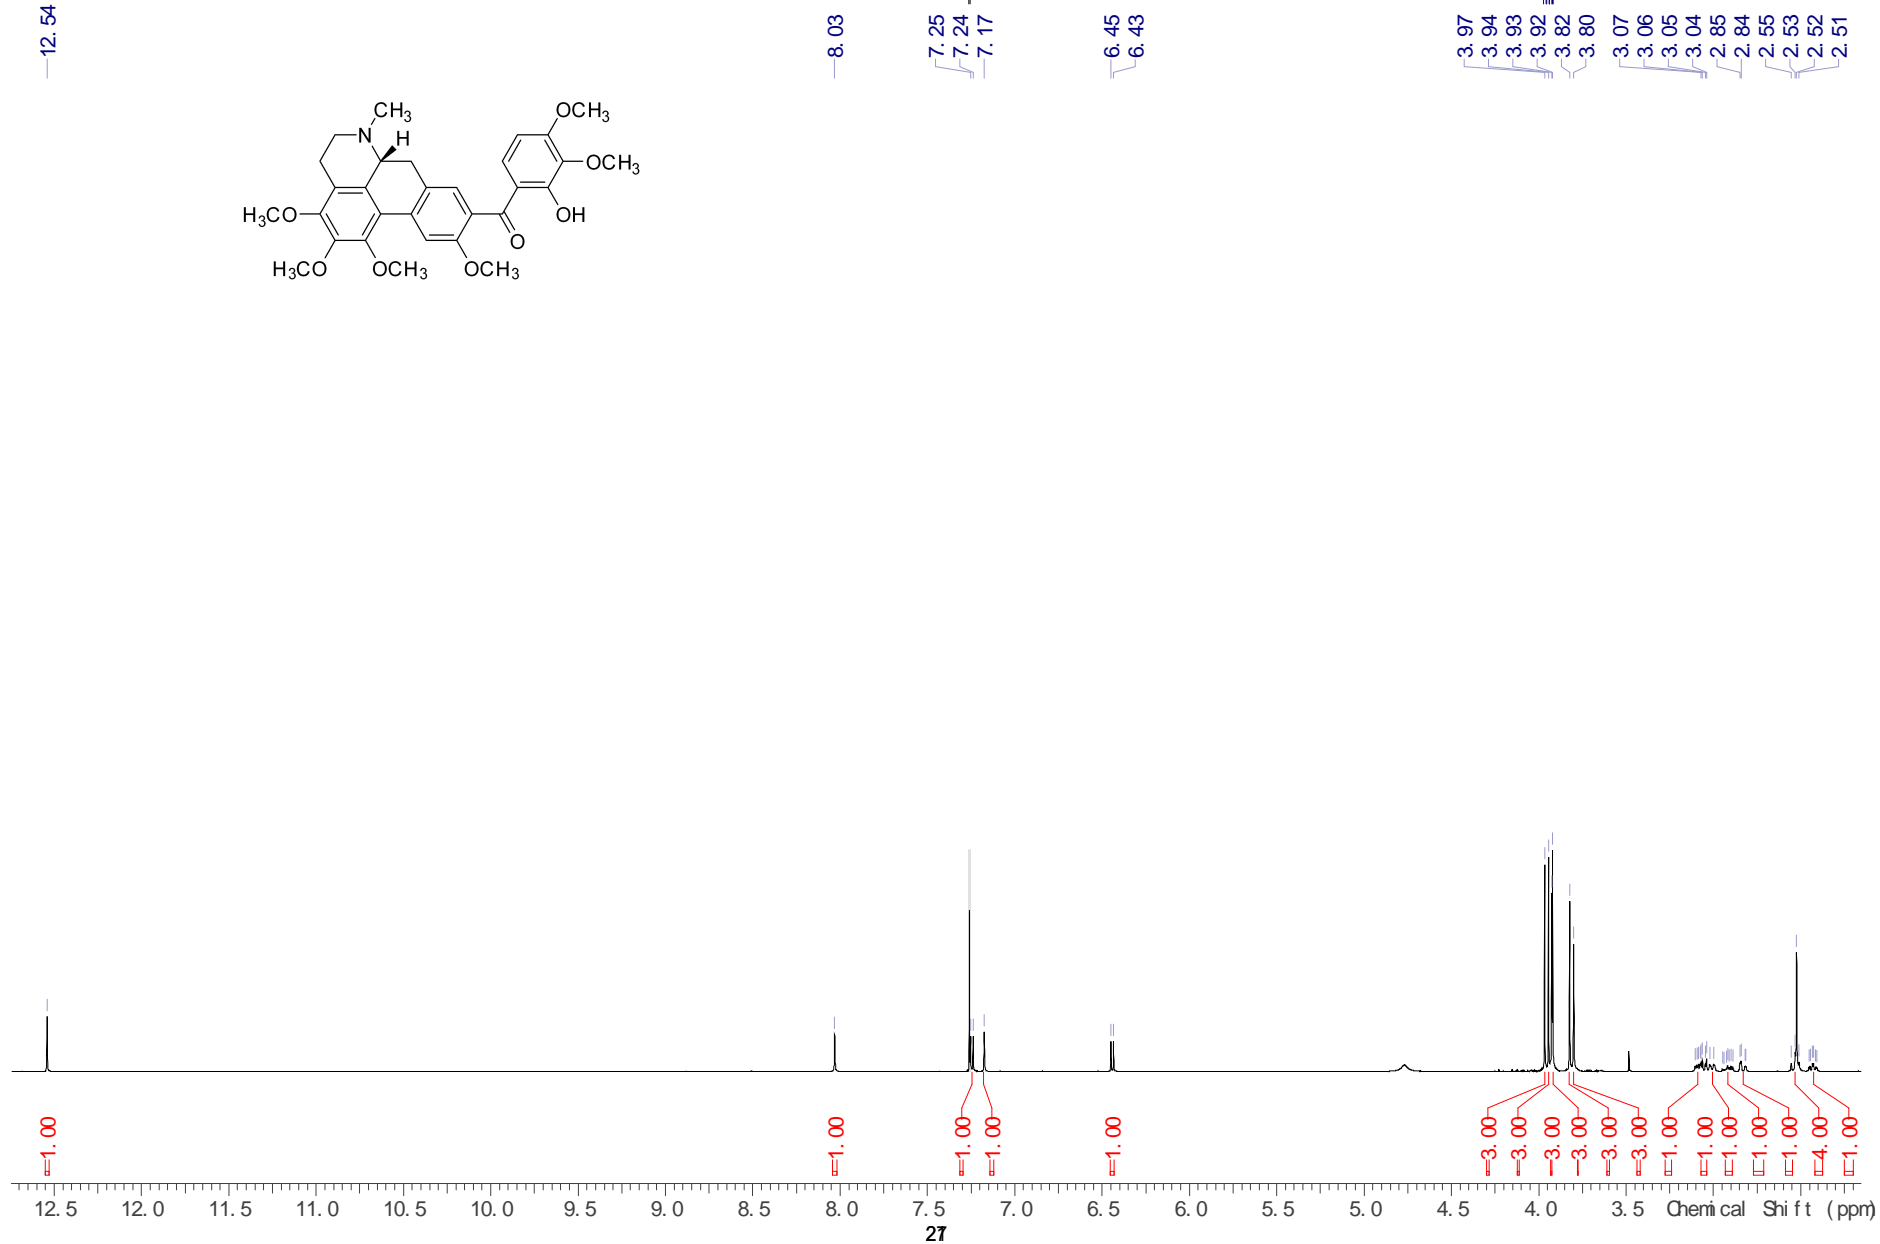

Figure S6.  $^{13}\text{C}$  NMR spectrum of thalfoetine A (1) in  $\text{CDCl}_3$  (150 MHz)

wtf1r29a.044.001.1r.esp

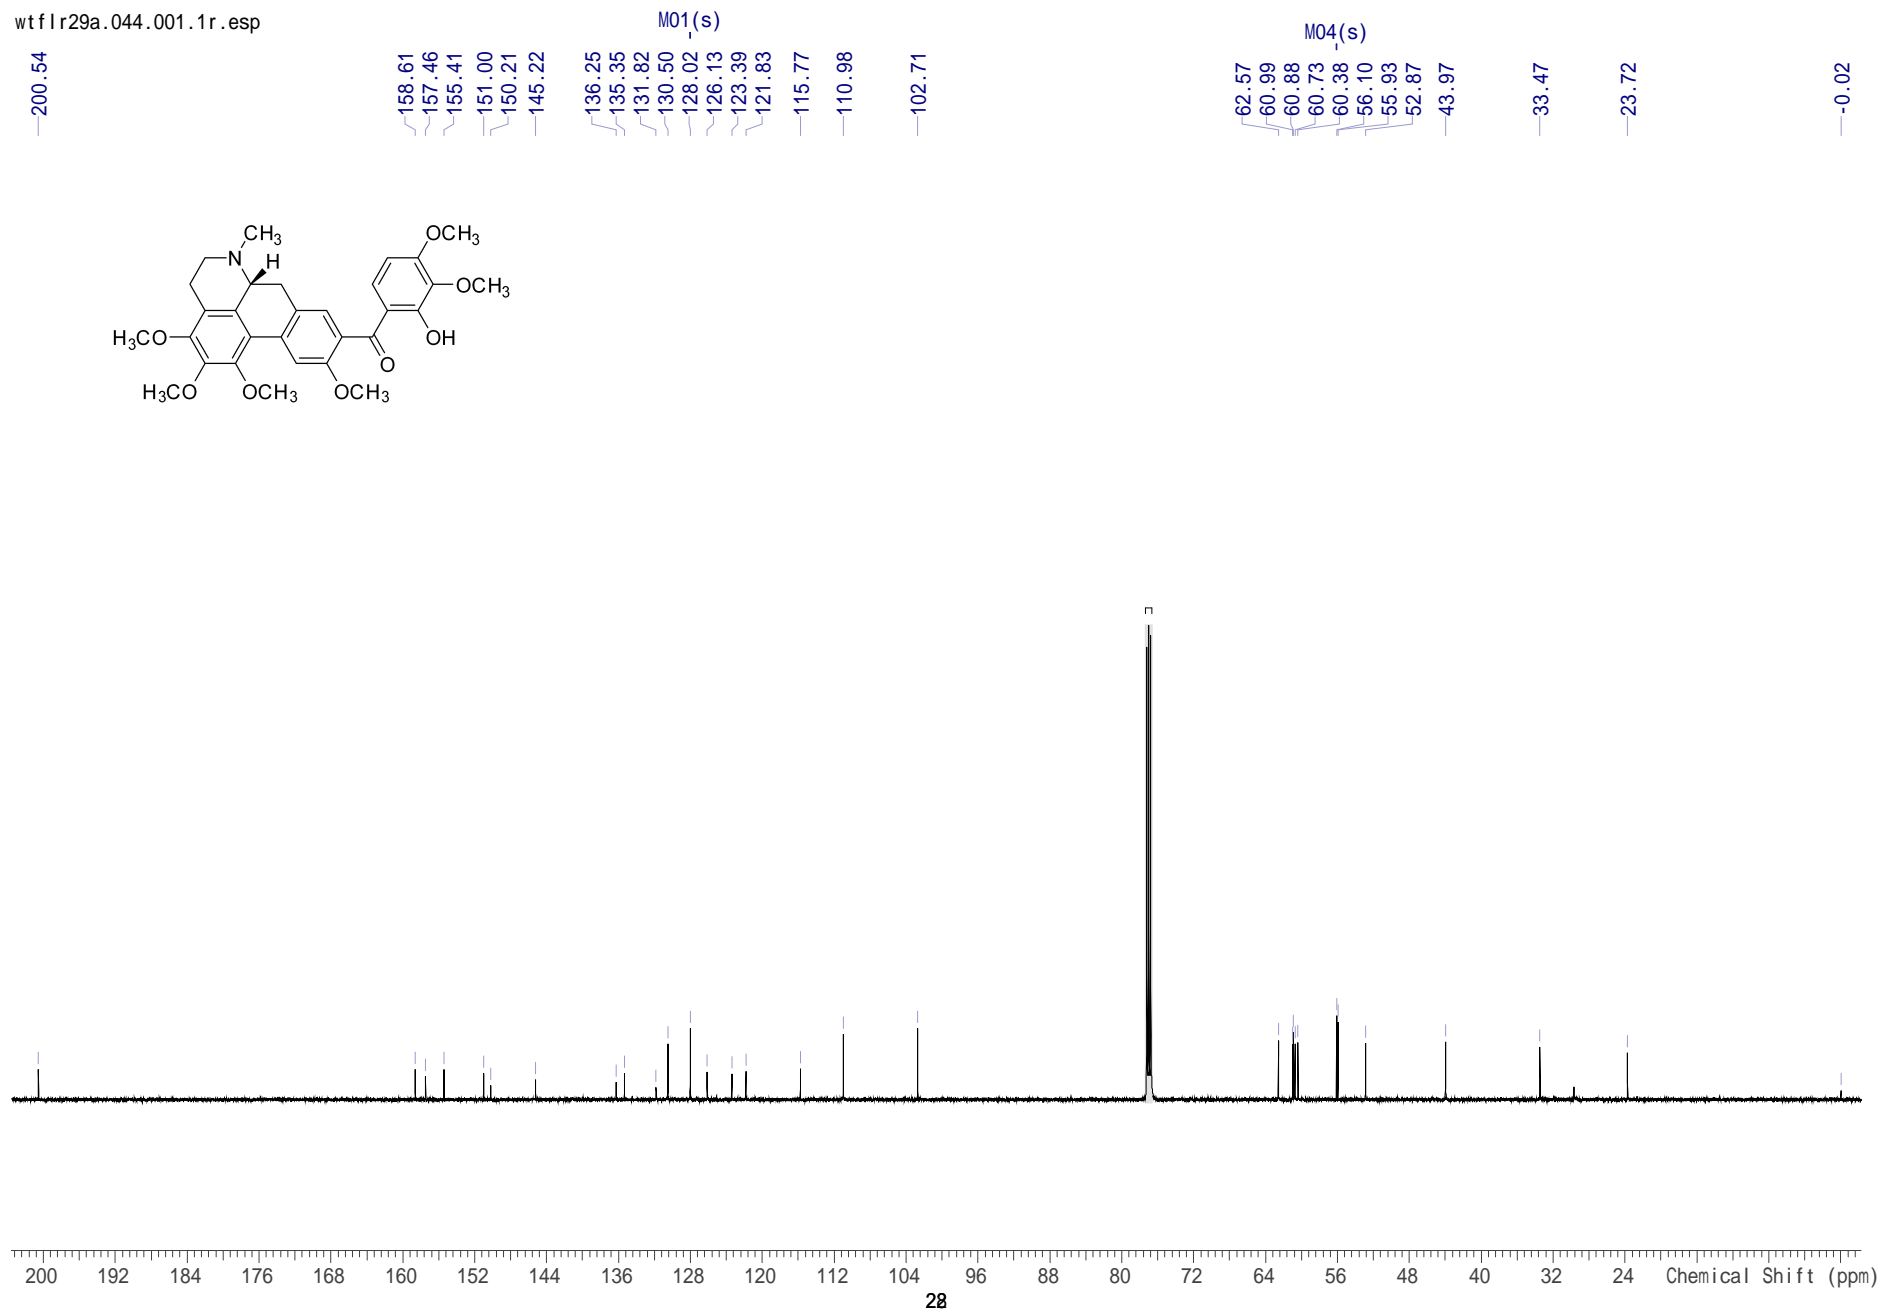

Figure S6-1. DEPT 90 spectrum of thalfoetine A (1) in CDCl<sub>3</sub> (150 MHz)

wtf1r29a.042.001.1r.esp

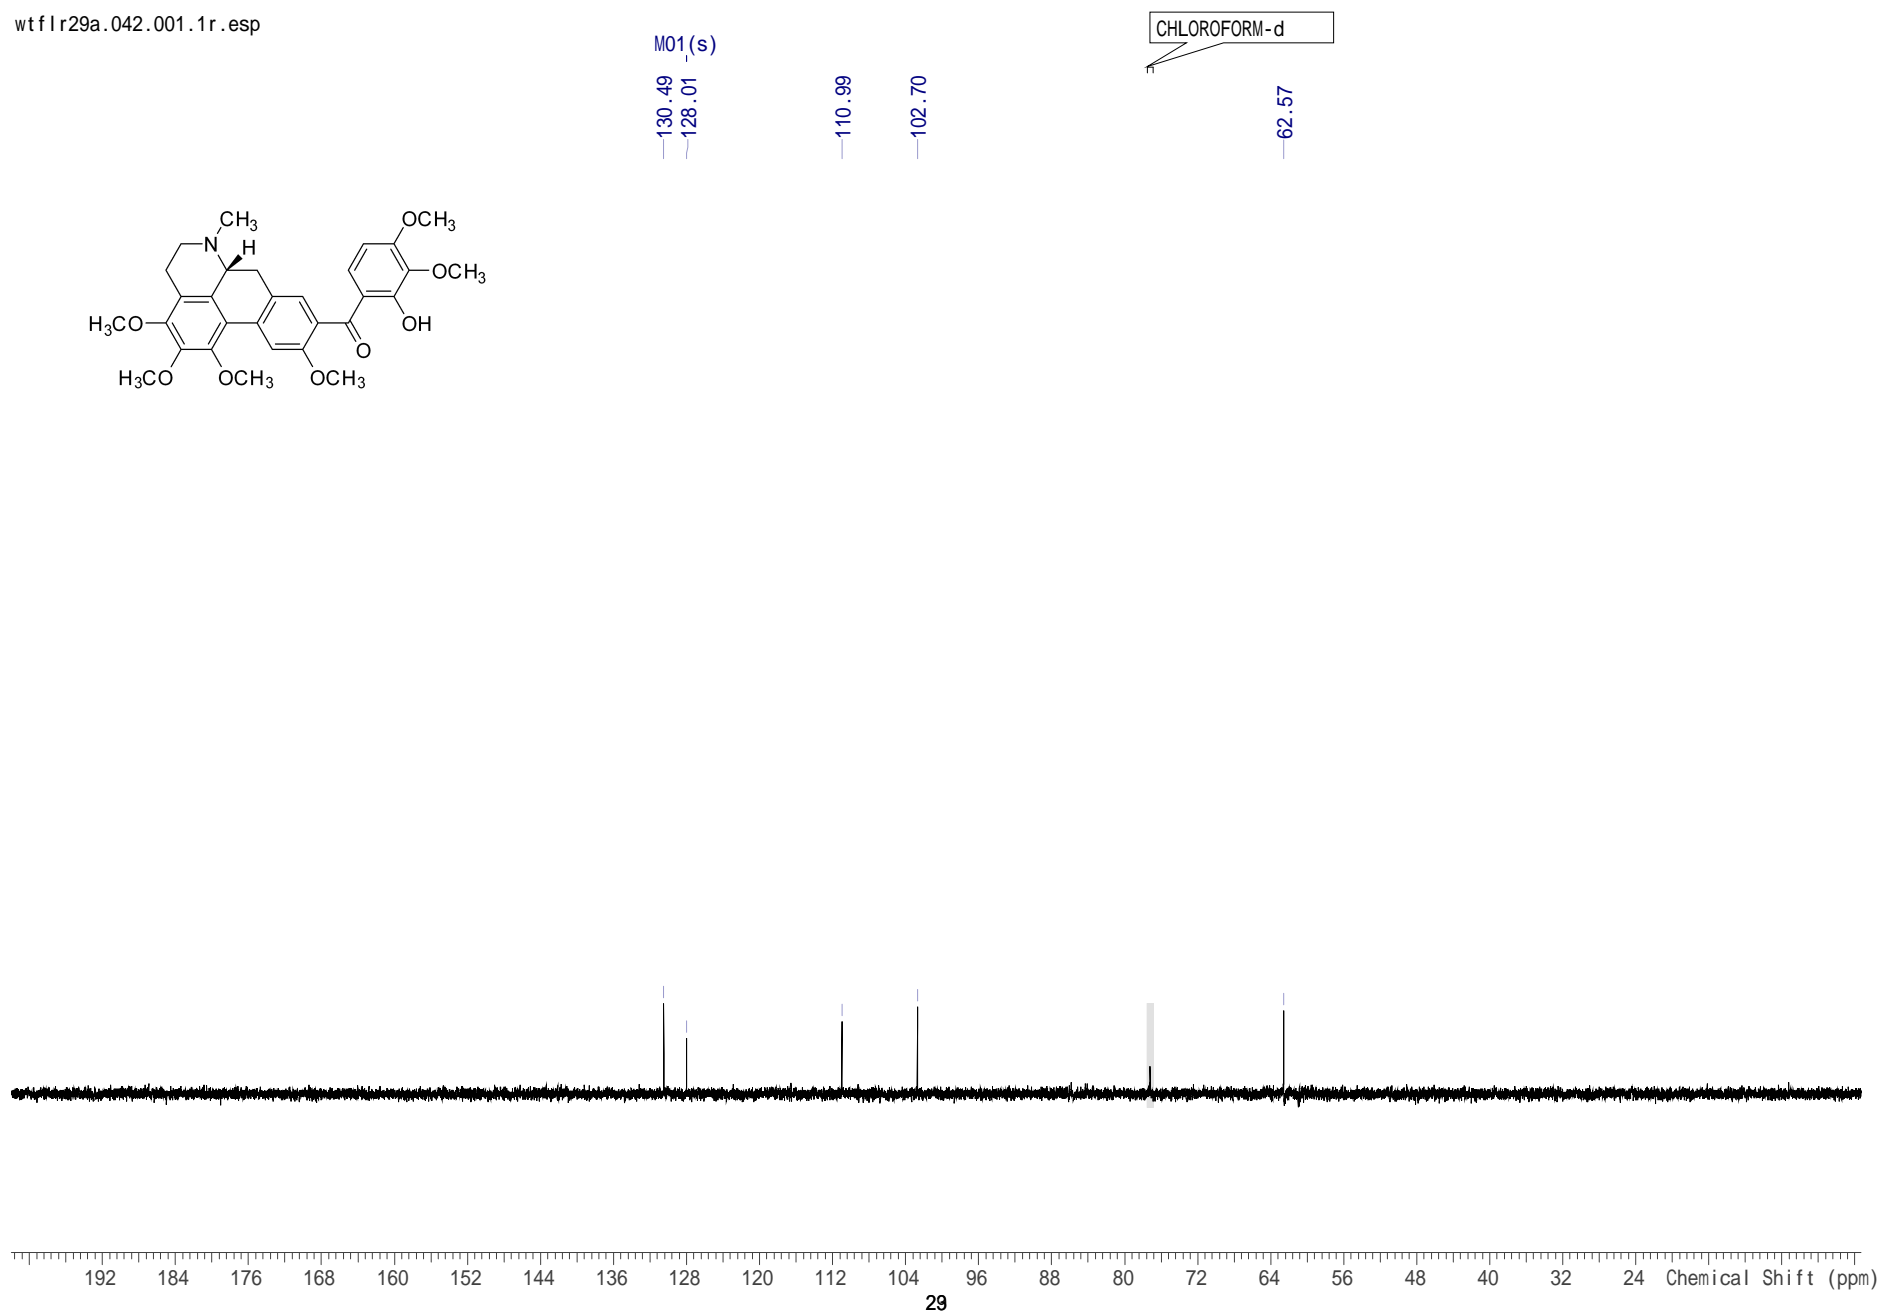

Figure S6-2. DEPT 135 spectrum of thalfoetine A (1) in CDCl<sub>3</sub> (150 MHz)

wtf1r29a.043.001.1r.esp

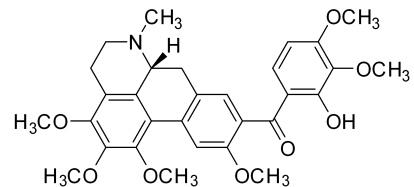

M01(s)

130.49  
128.02

M05(s)

62.57  
60.73  
60.38  
56.10  
52.87

43.97

33.47

23.72

-0.02

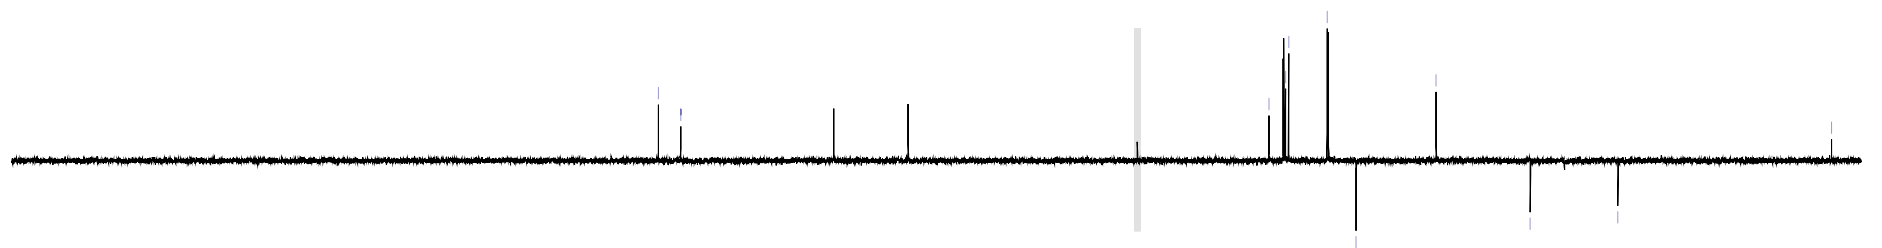

200 192 184 176 168 160 152 144 136 128 120 112 104 96 88 80 72 64 56 48 40 32 24 Chemical Shift (ppm)

Figure S7. HSQC spectrum of thalfoetine A (1) in CDCl<sub>3</sub> (600 MHz)

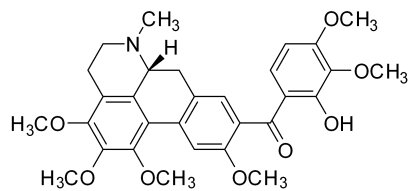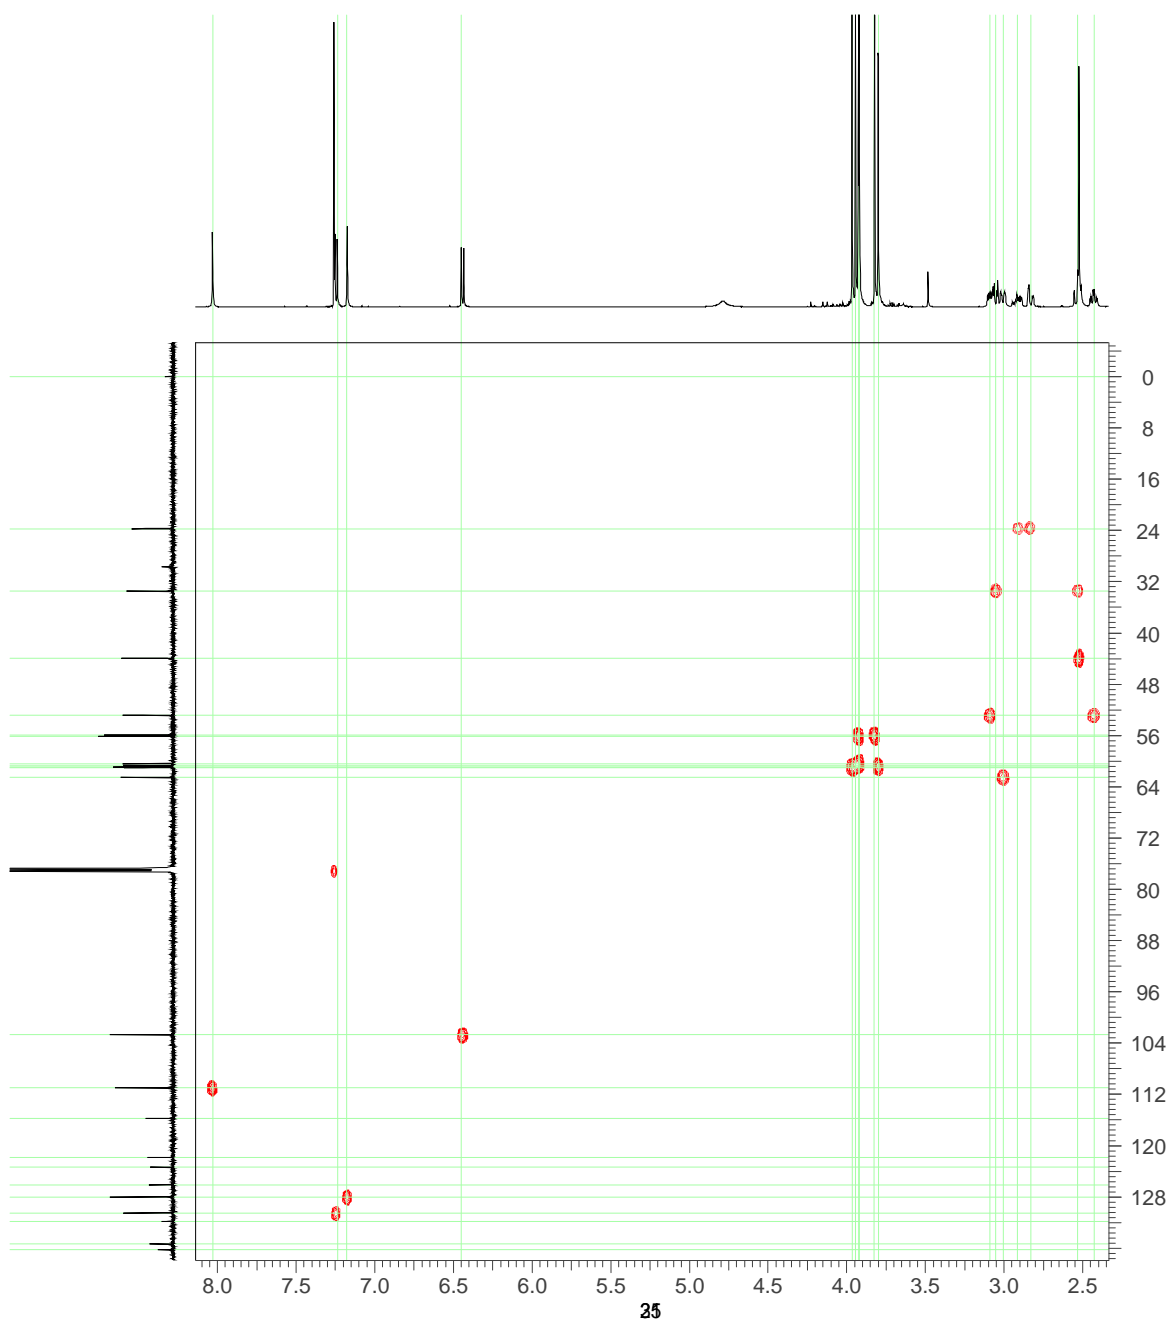

Figure S8. HMBC spectrum of thalfoetine A (1) in CDCl<sub>3</sub> (600 MHz)

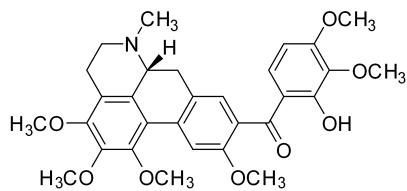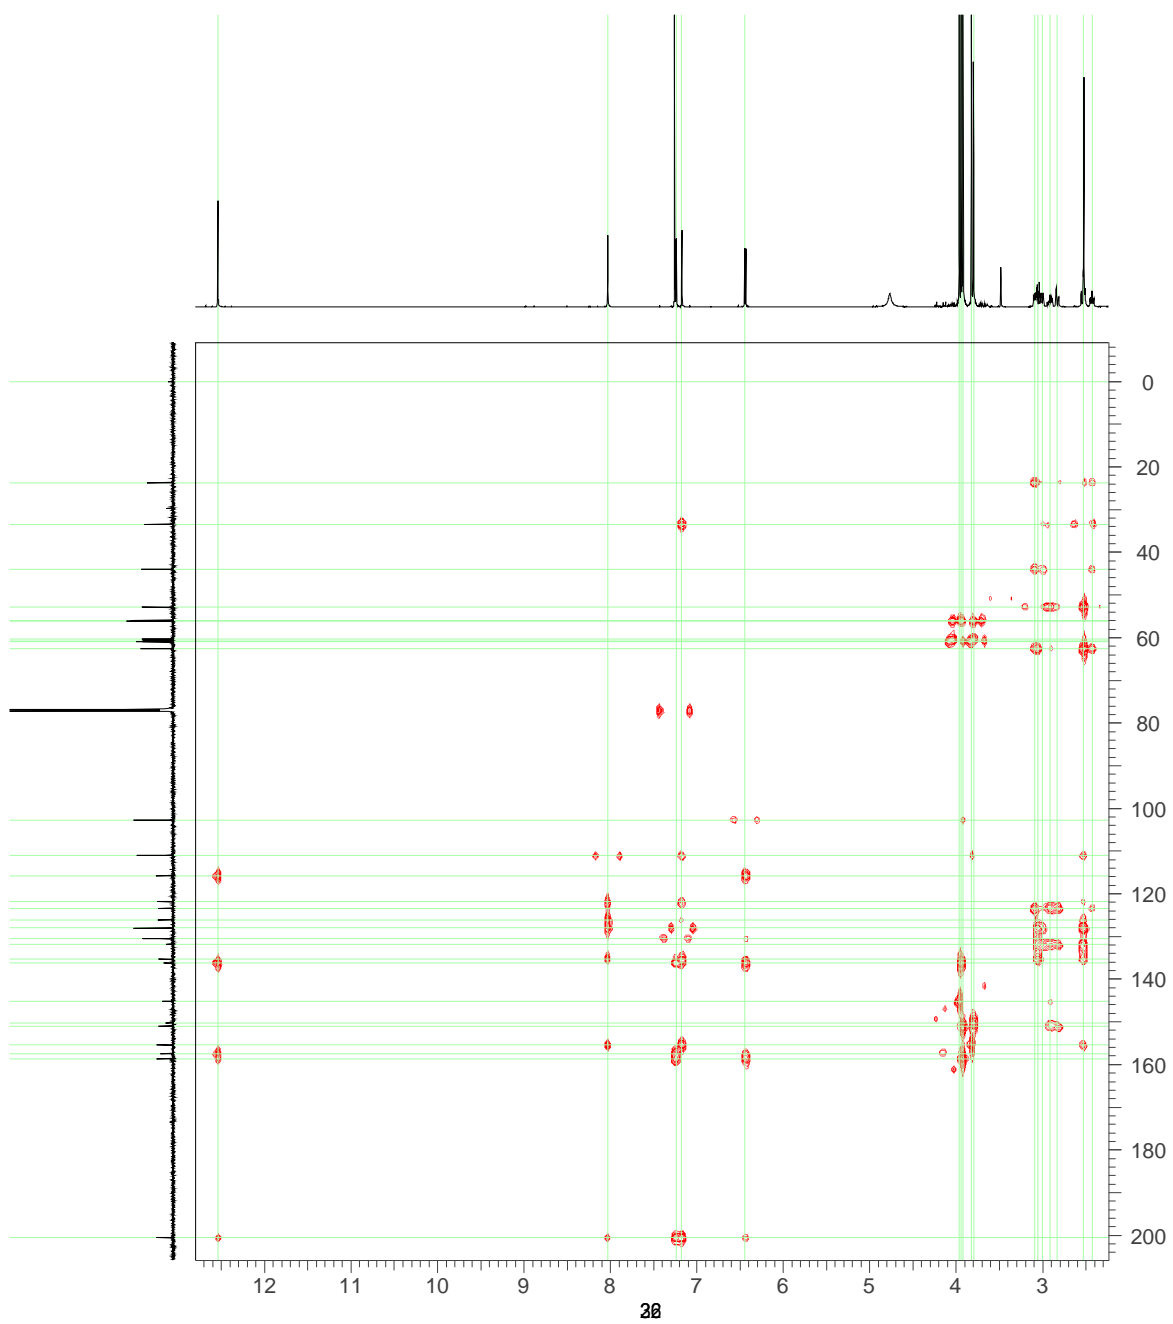



Figure S8-1. The partially enlarged HMBC spectrum of thalfoetine A (1) in CDCl<sub>3</sub> (600 MHz)

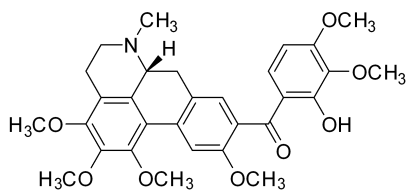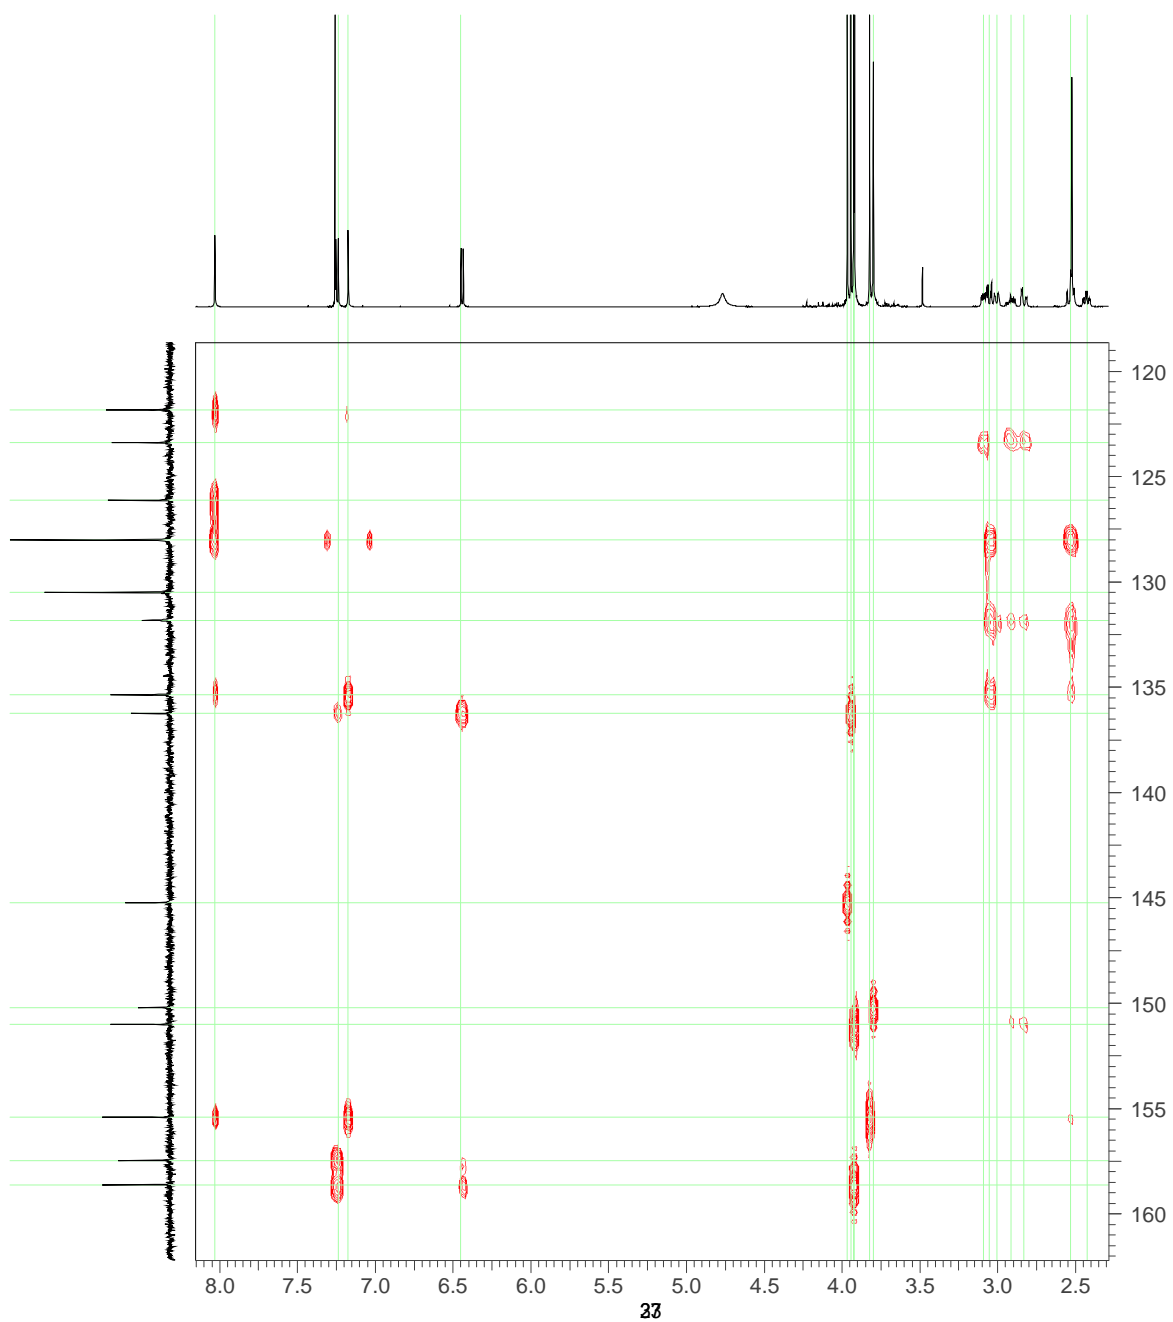

Figure S8-2. The partially enlarged HMBC spectrum of thalfoetine A (1) in CDCl<sub>3</sub> (600 MHz)

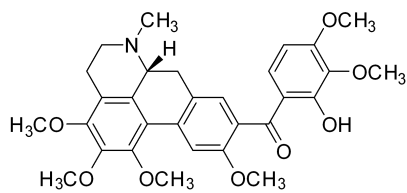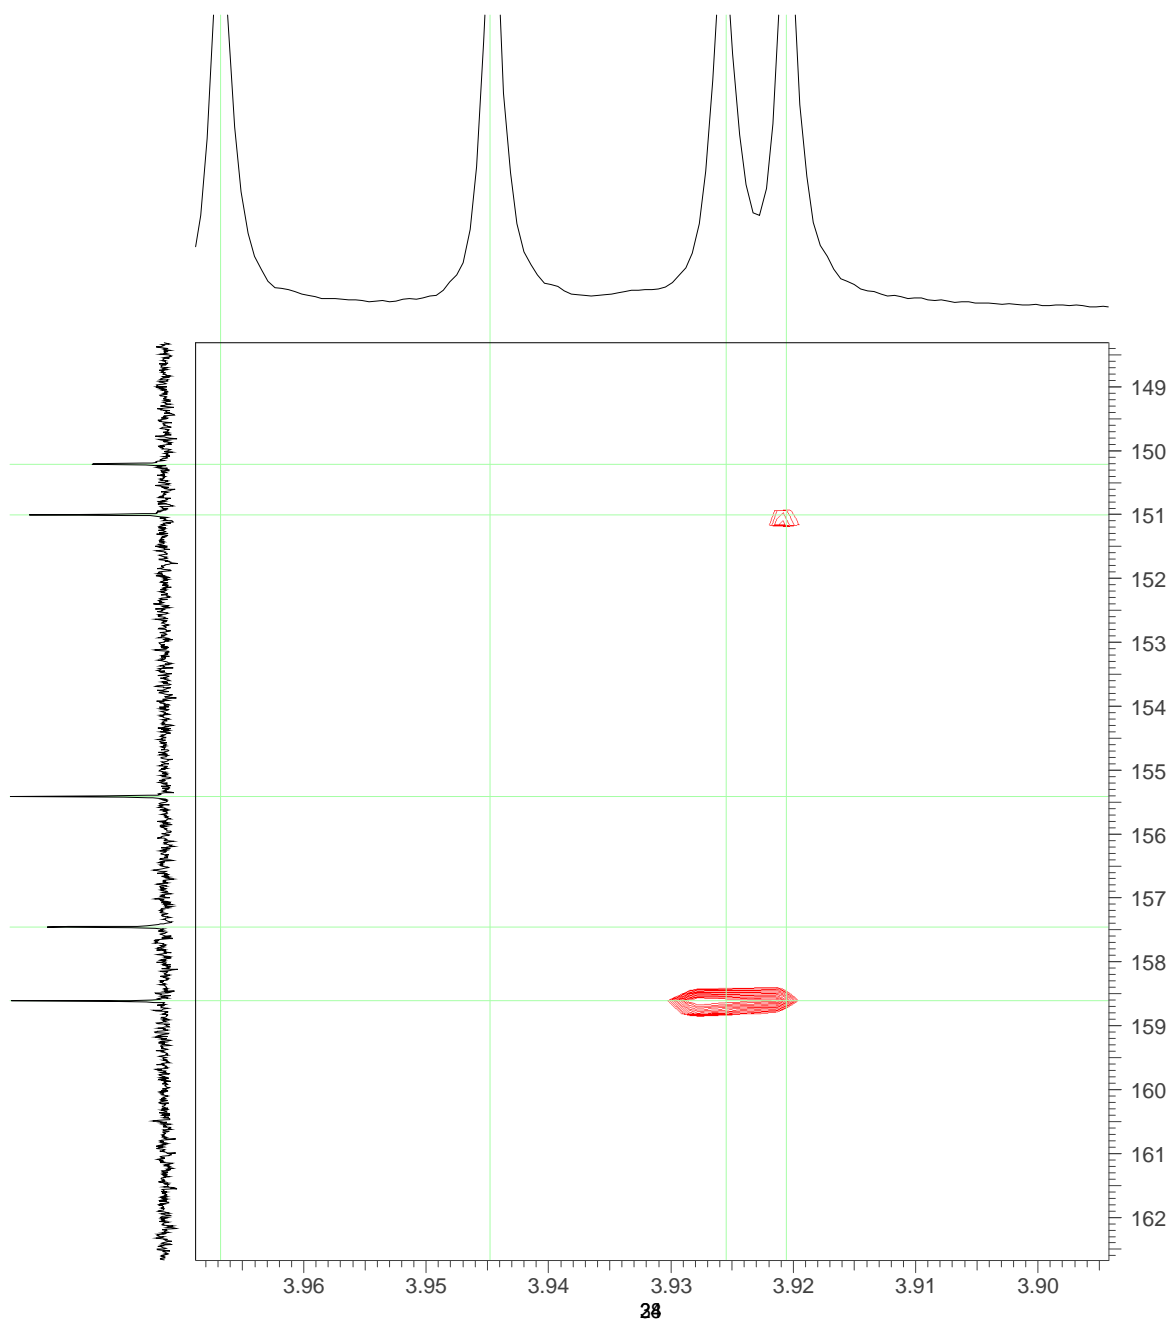

Figure S8-3. The partially enlarged HMBC spectrum of thalfoetine A (1) in CDCl<sub>3</sub> (600 MHz)

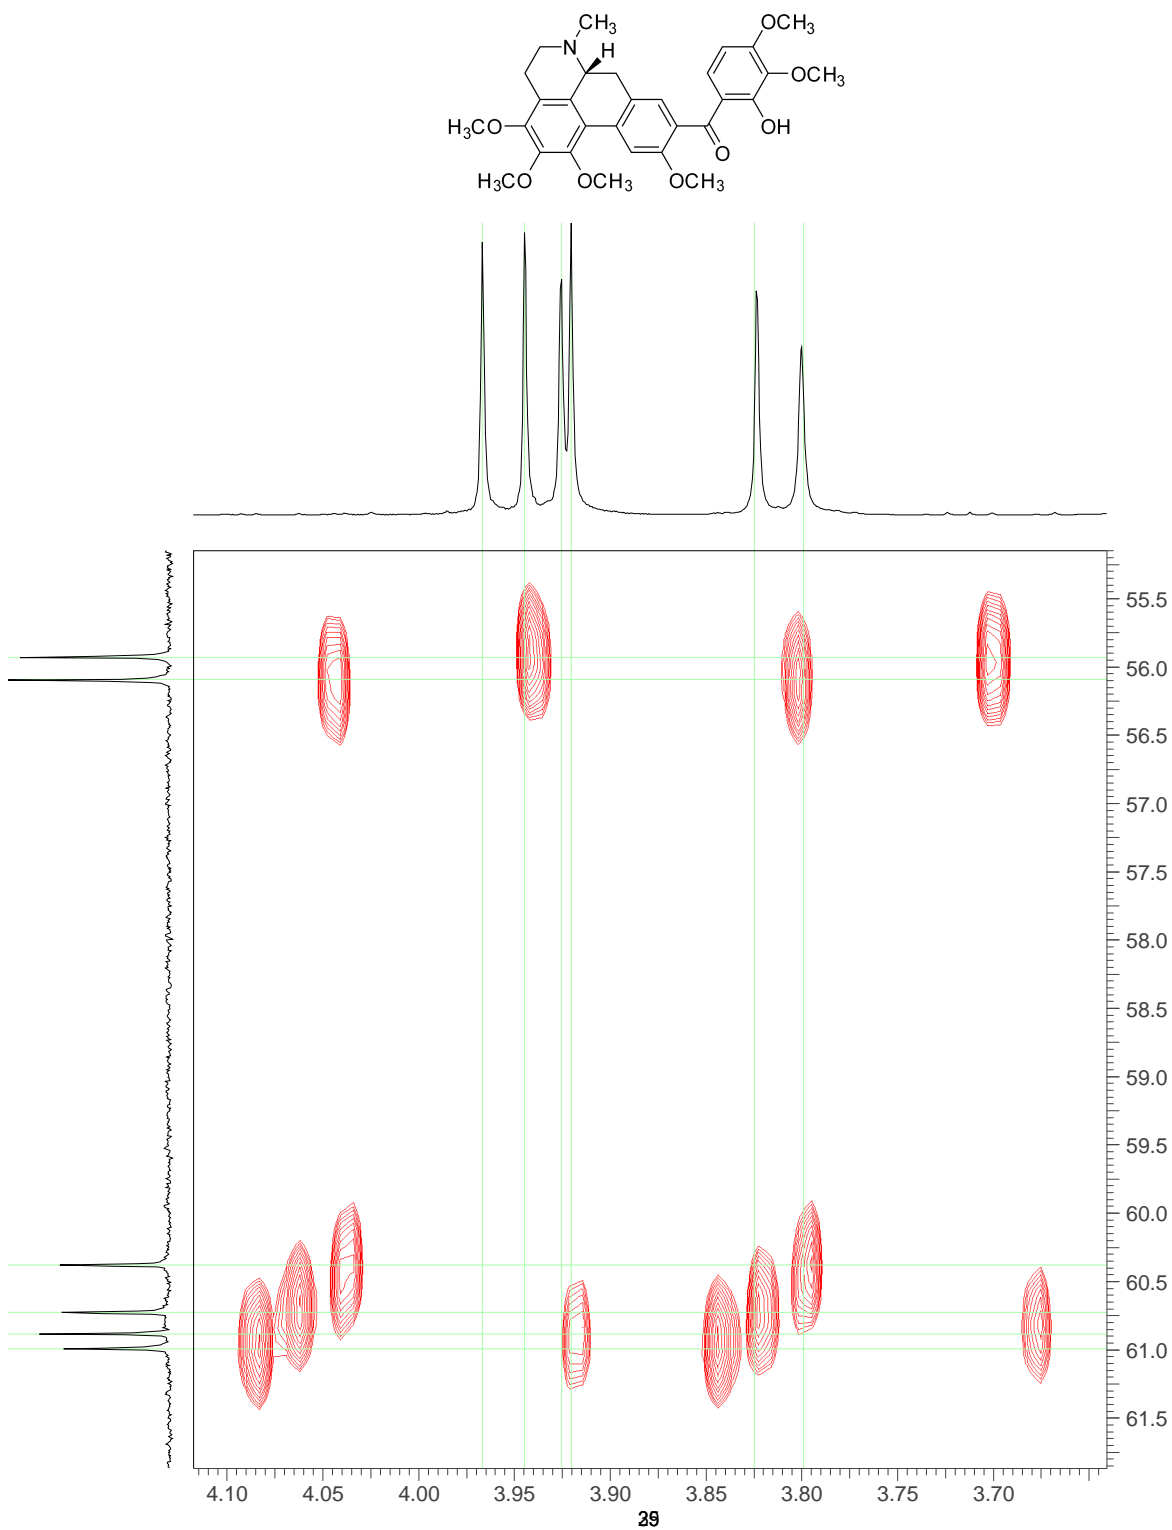

Figure S9.  $^1\text{H}$ - $^1\text{H}$  COSY spectrum of thalfoetine A (1) in  $\text{CDCl}_3$  (600 MHz)

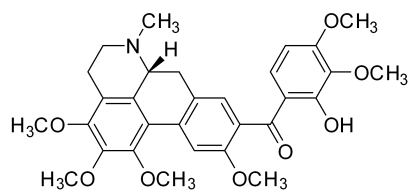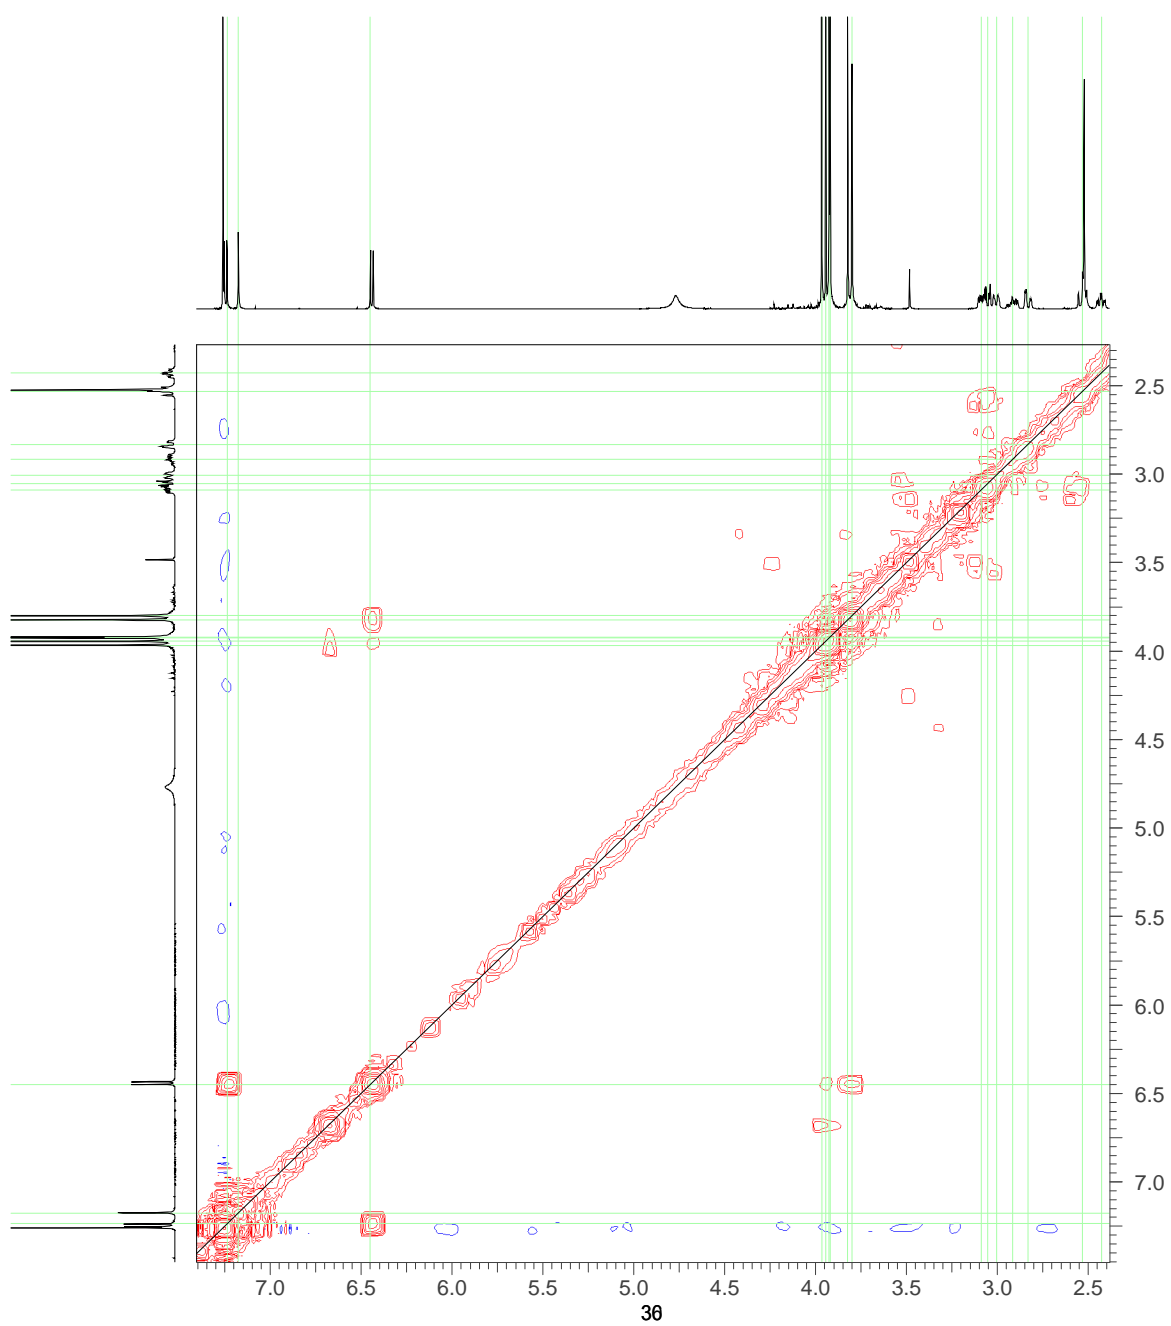

Figure S10. ROESY spectrum of thalfoetine A (1) in CDCl<sub>3</sub> (600 MHz)

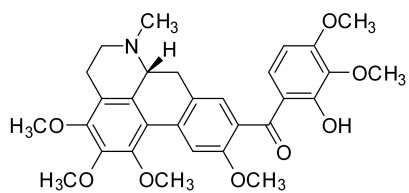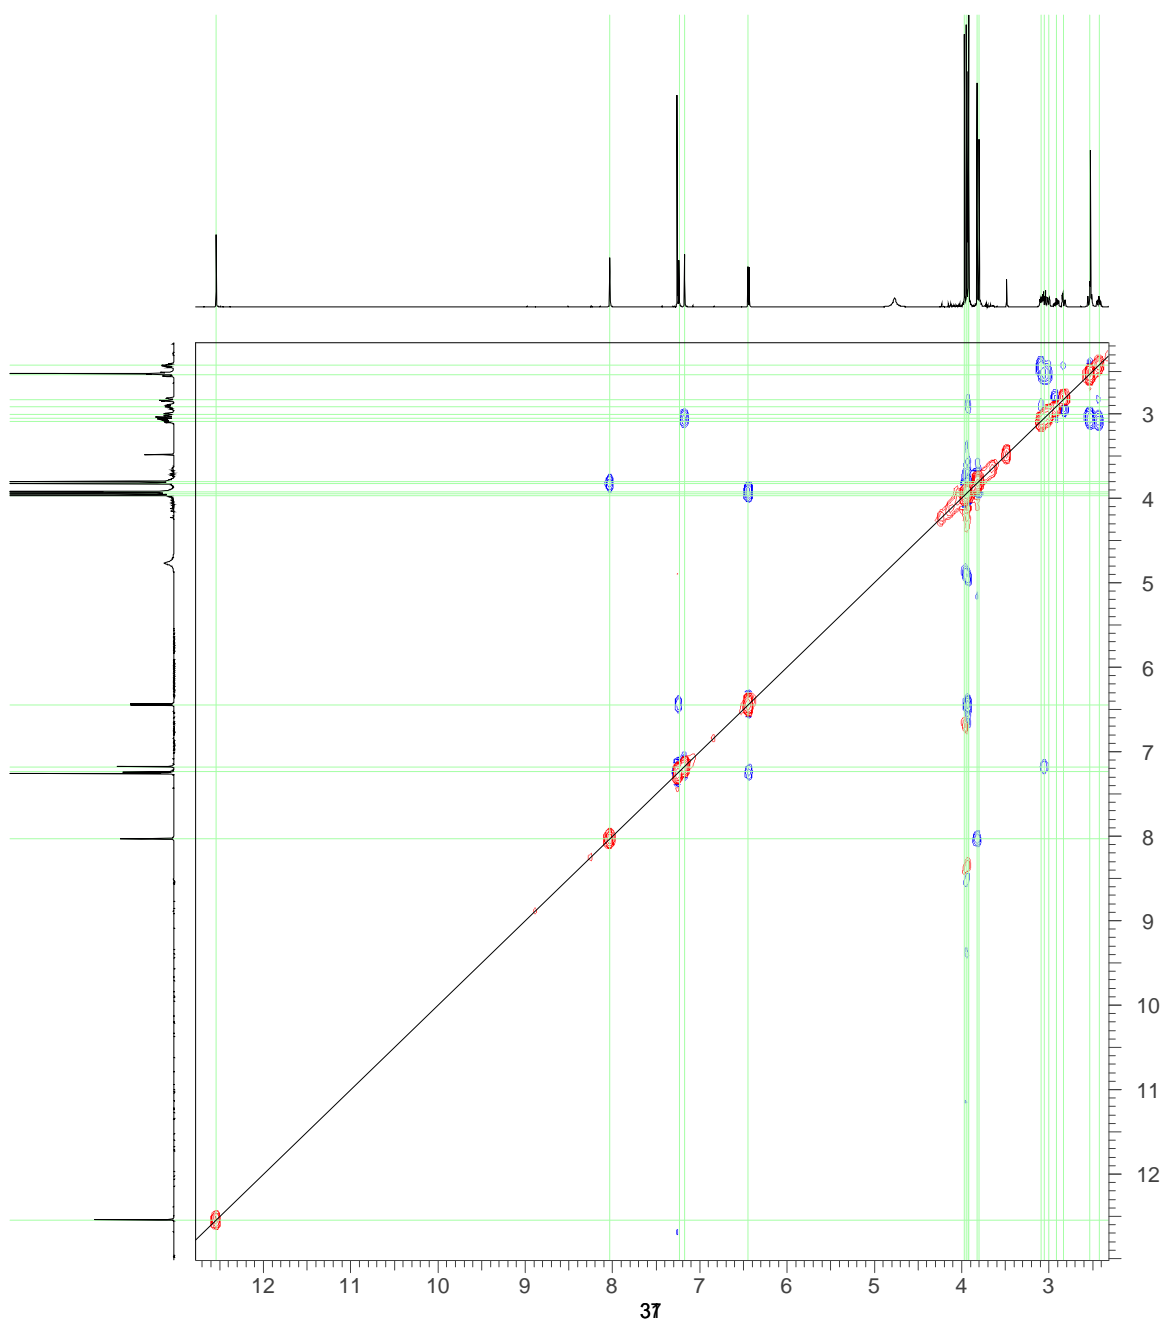

Figure S10-1. The partially enlarged ROESY spectrum of thalfoetine A (1) in CDCl<sub>3</sub> (600 MHz)

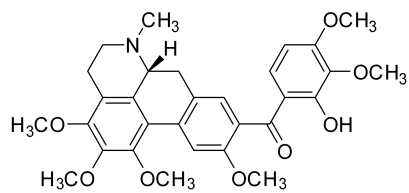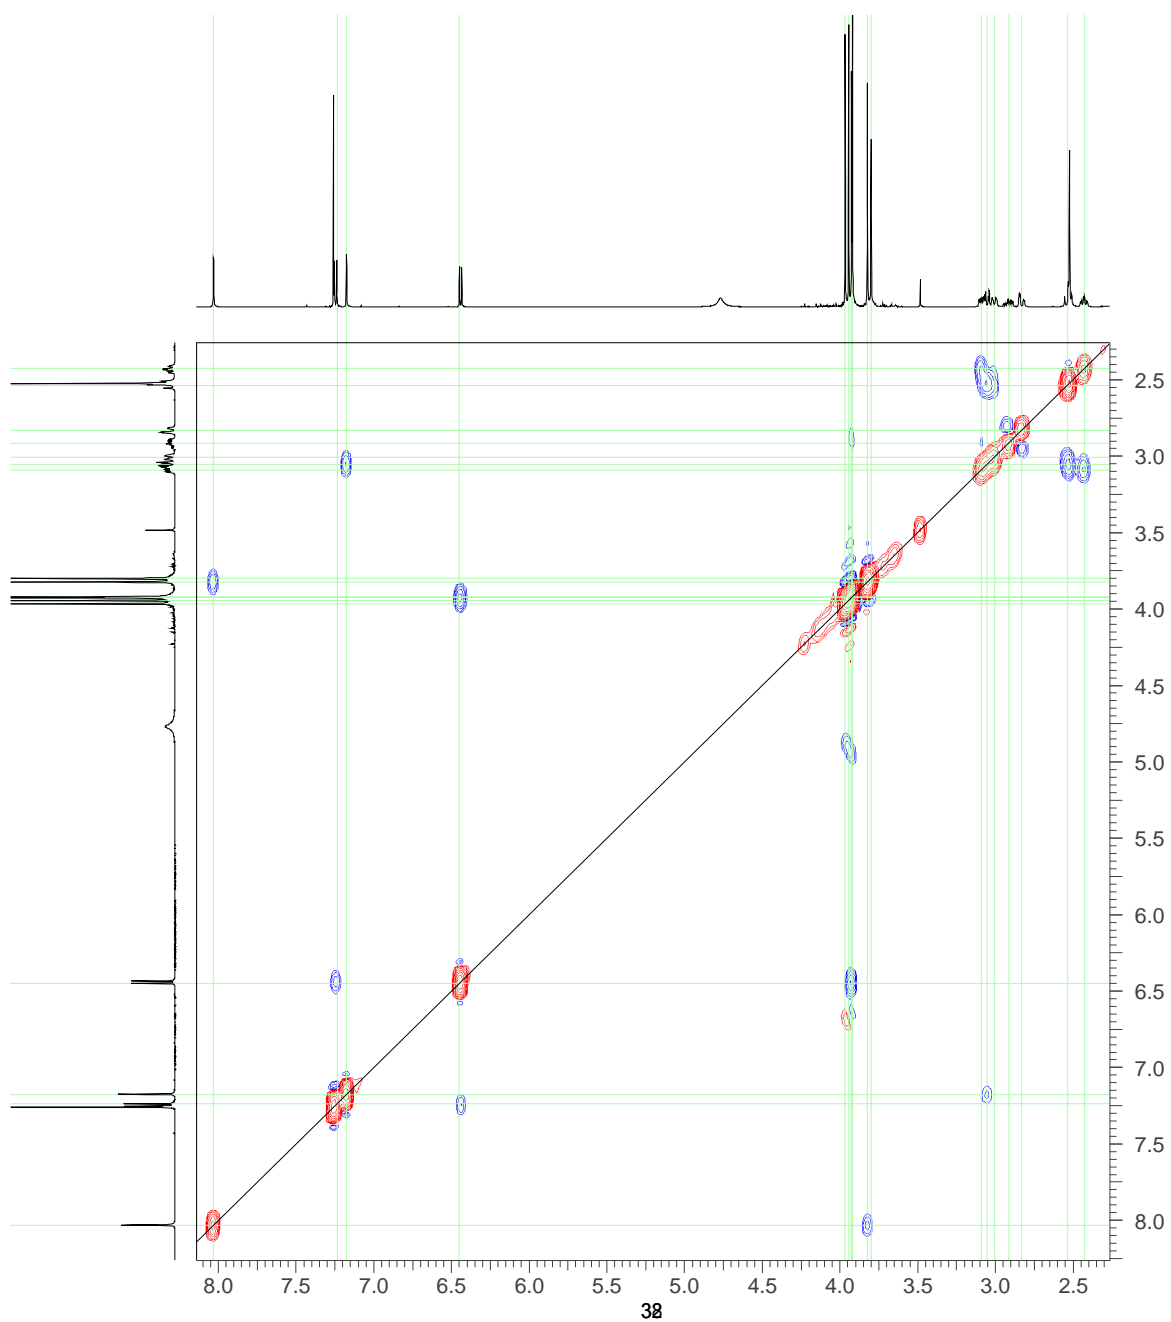

Figure S10-2. The partially enlarged ROESY spectrum of thalfoetine A (1) in CDCl<sub>3</sub> (600 MHz)

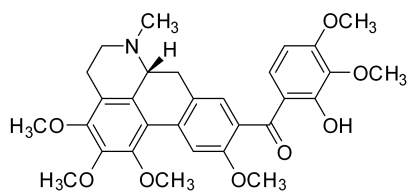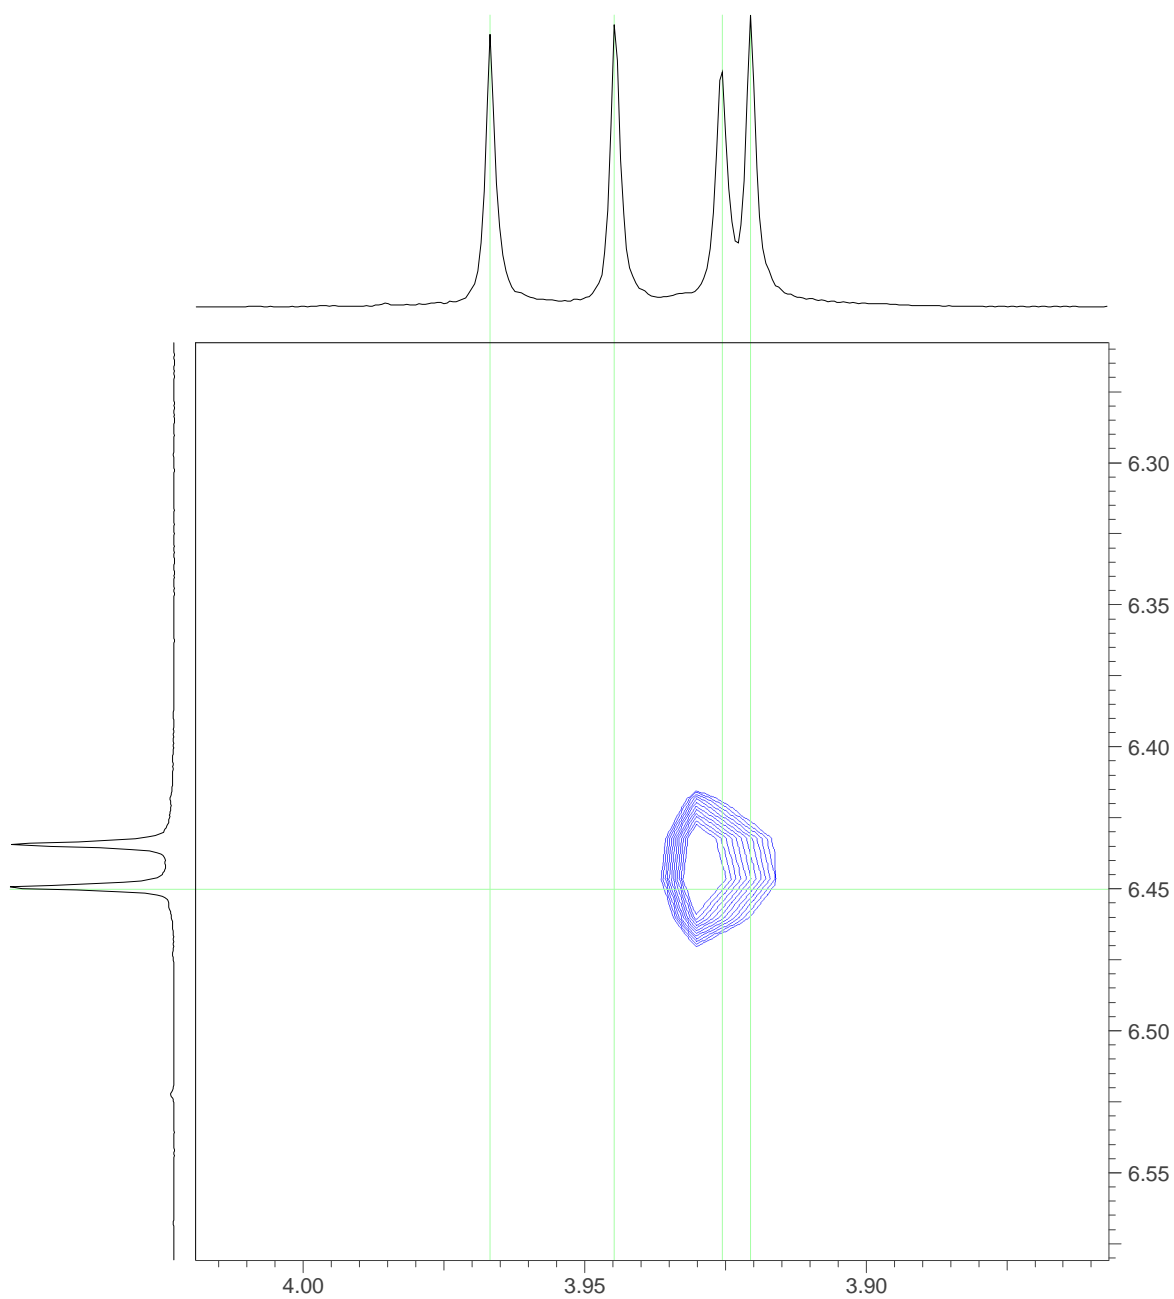

Figure S10-3. The partially enlarged ROESY spectrum of thalfoetine A (1) in CDCl<sub>3</sub> (600 MHz)

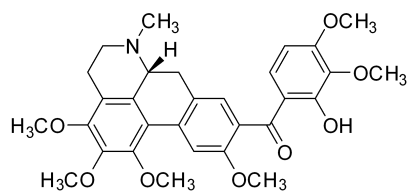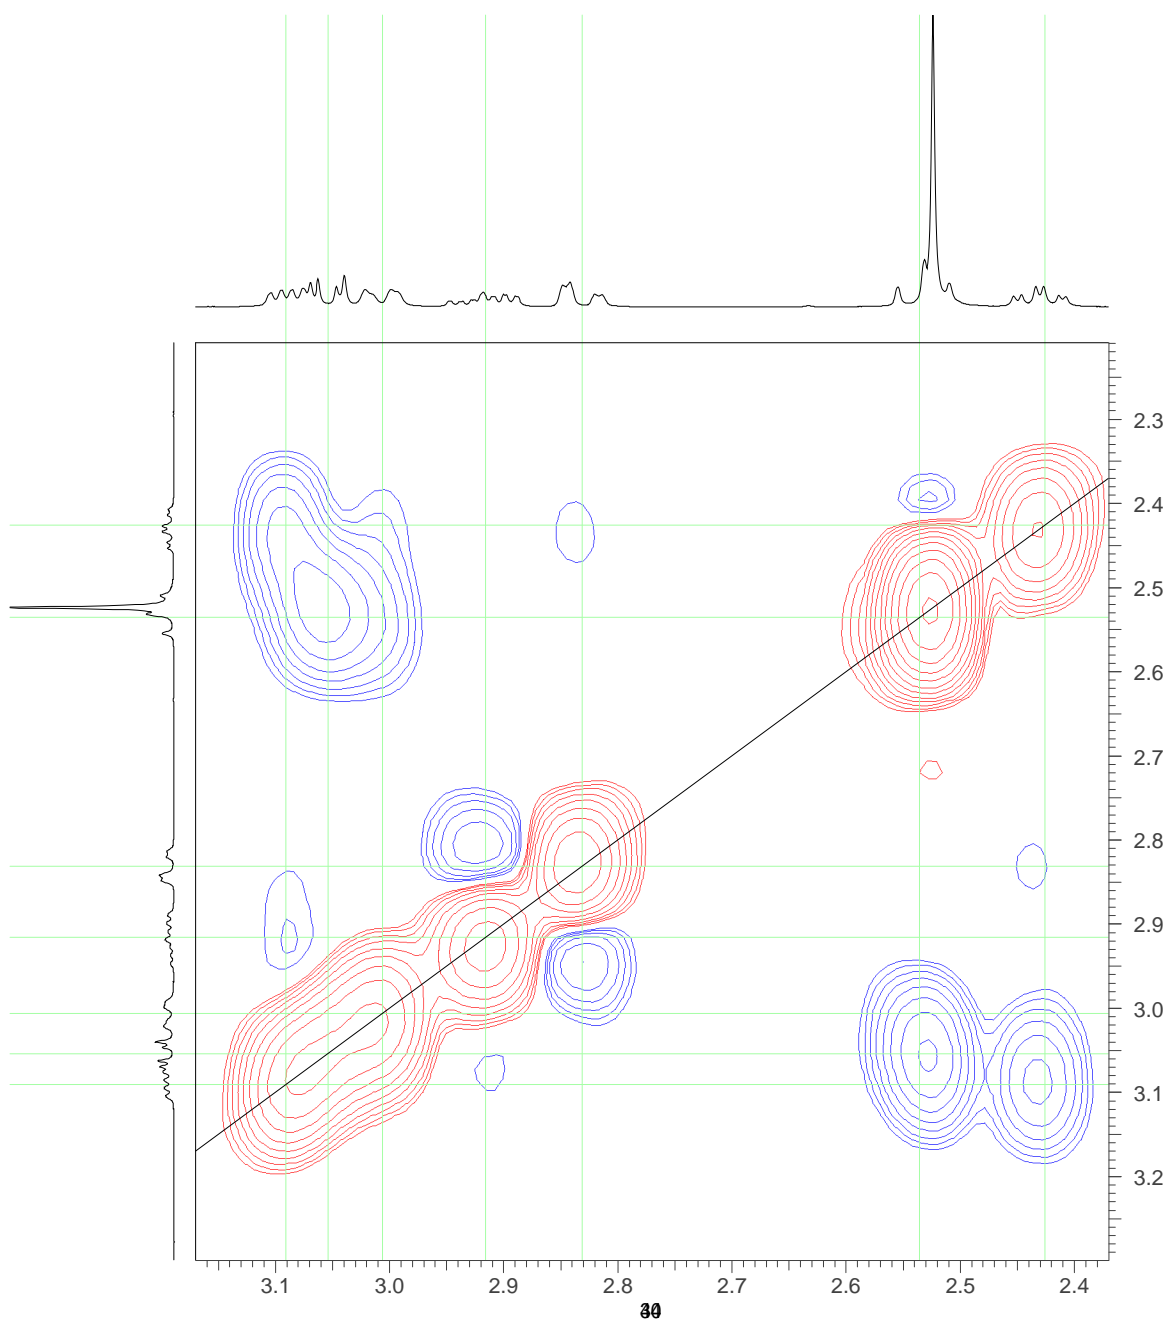



Figure S10-4. The partially enlarged ROESY spectrum of thalfoetine A (1) in  $\text{CDCl}_3$  (600 MHz)

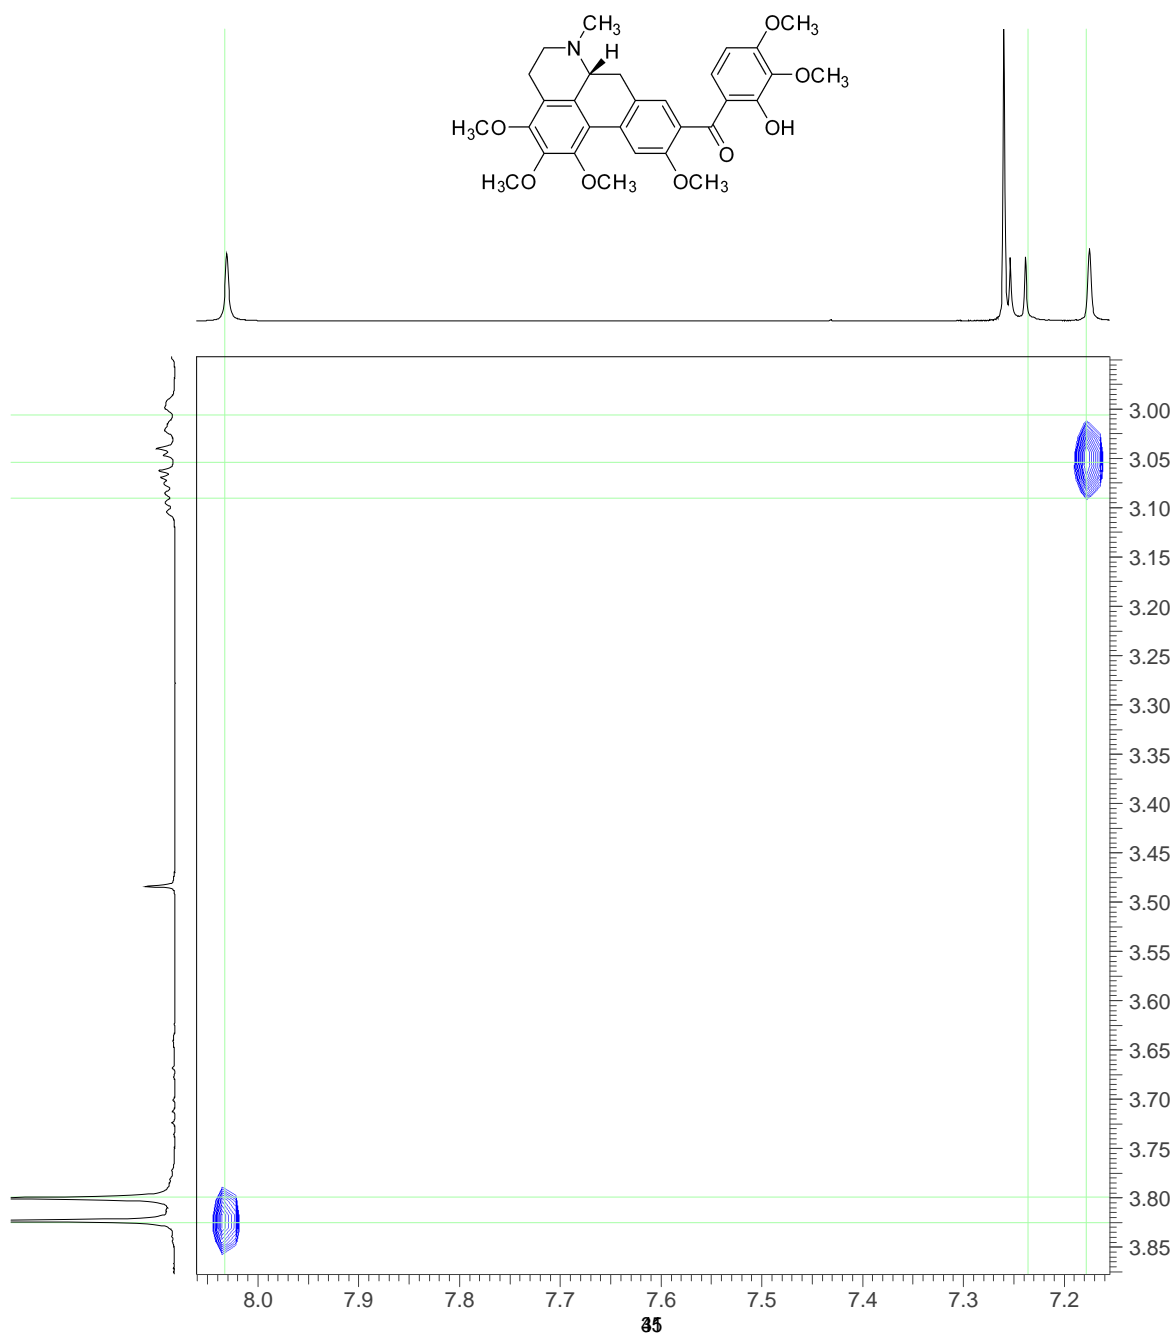

Figure S11. HREIMS spectrum of thalfoetine B (2)

Data File: E:\DATA\2017\1218\wtlfr-80a.lcd

| Elmt | Val. | Min | Max | Elmt | Val. | Min | Max | Elmt | Val. | Min | Max | Use Adduct |
|------|------|-----|-----|------|------|-----|-----|------|------|-----|-----|------------|
| H    | 1    | 0   | 100 | O    | 2    | 0   | 50  | Cl   | 1    | 0   | 0   | H          |
| C    | 4    | 0   | 50  | F    | 1    | 0   | 0   | Br   | 1    | 0   | 0   |            |
| N    | 3    | 0   | 10  | S    | 2    | 0   | 0   | I    | 3    | 0   | 0   |            |

Error Margin (ppm): 5  
 HC Ratio: unlimited  
 Max Isotopes: all  
 MSn Iso RI (%): 75.00

DBE Range: -2.0 - 100.0  
 Apply N Rule: yes  
 Isotope RI (%): 1.00  
 MSn Logic Mode: AND

Electron Ions: both  
 Use MSn Info: yes  
 Isotope Res: 10000  
 Max Results: 10

Event#: 1 MS(E+) Ret. Time : 0.320 -> 0.400 Scan# : 65 -> 81

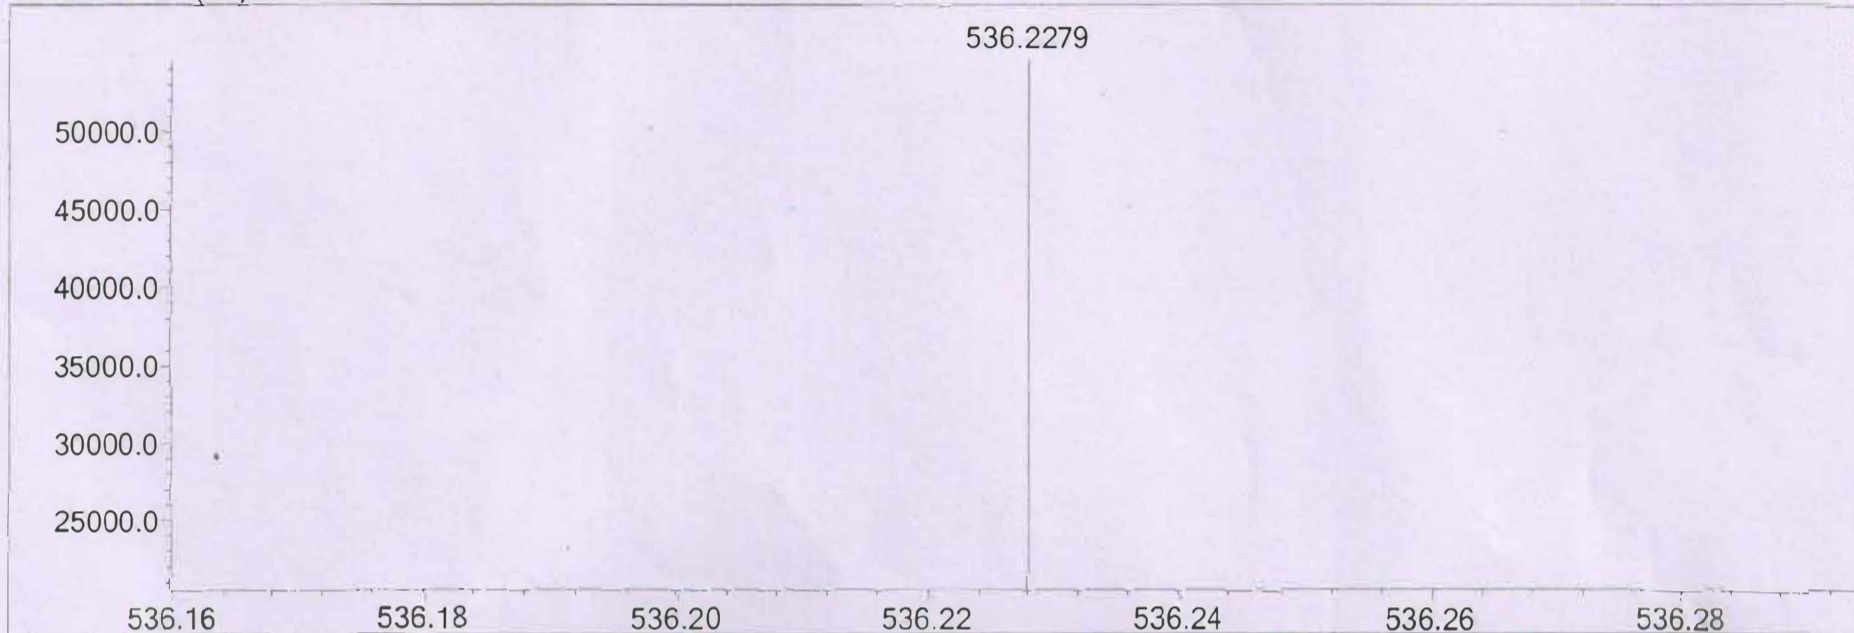

Measured region for 536.2279 m/z

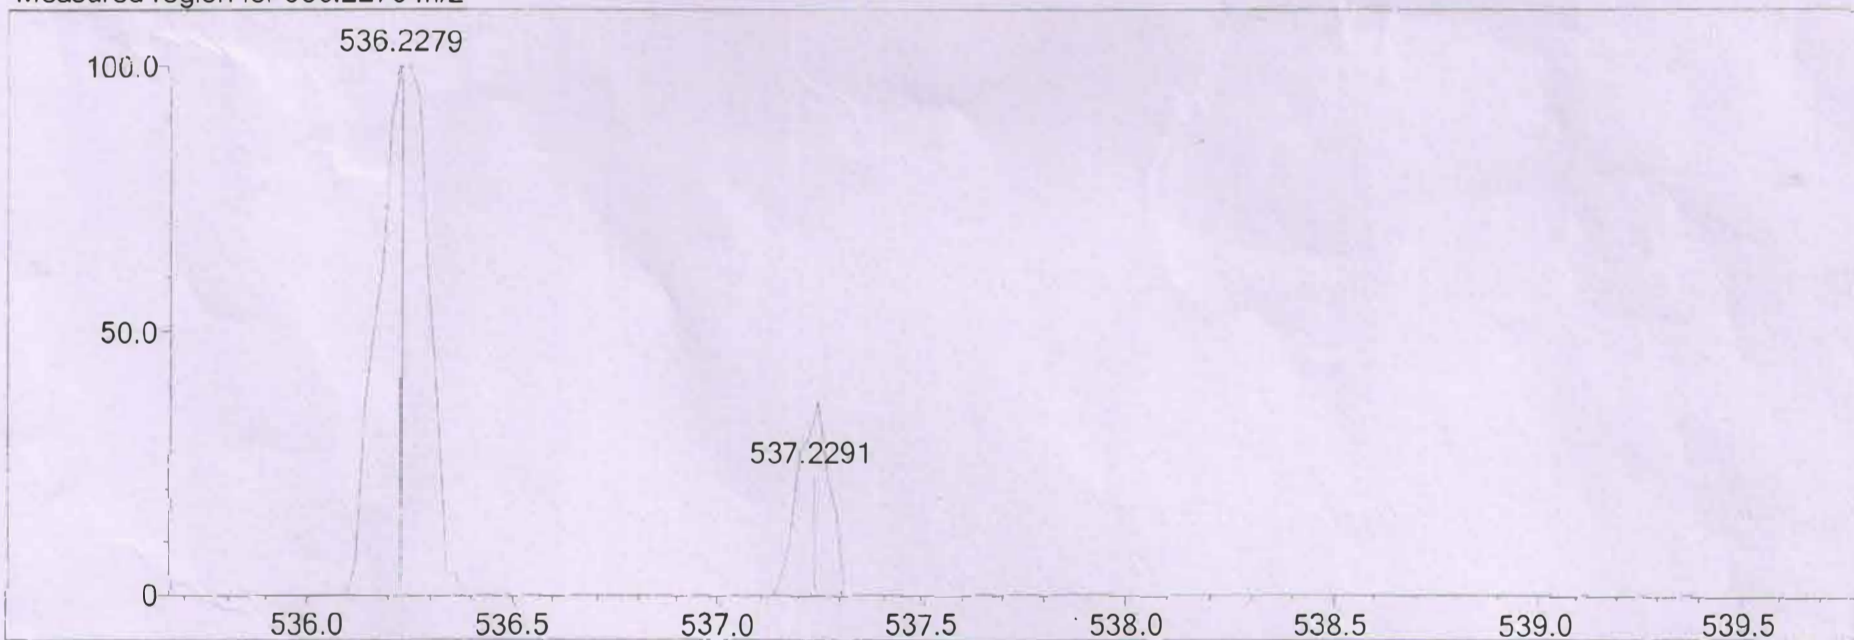

C30 H33 N O8 [M+H]<sup>+</sup> : Predicted region for 536.2279 m/z

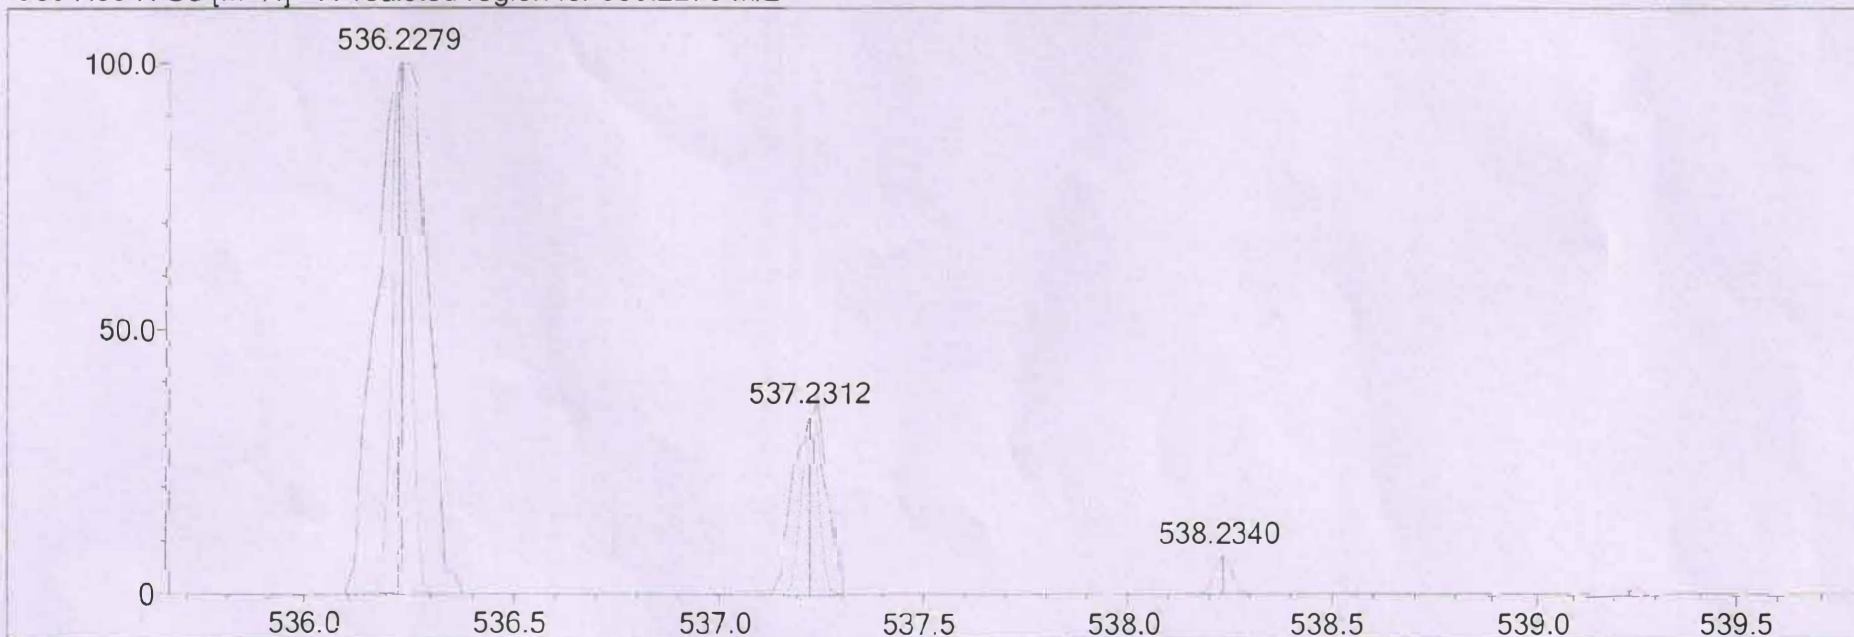

| Formula (M)  | Ion                | Meas. m/z | Pred. m/z | Df. (mDa) | Df. (ppm) | DBE  |
|--------------|--------------------|-----------|-----------|-----------|-----------|------|
| C30 H33 N O8 | [M+H] <sup>+</sup> | 536.2279  | 536.2279  | 0.0       | 0.00      | 15.0 |

Figure S12. IR spectrum of thalfoetine B (2)

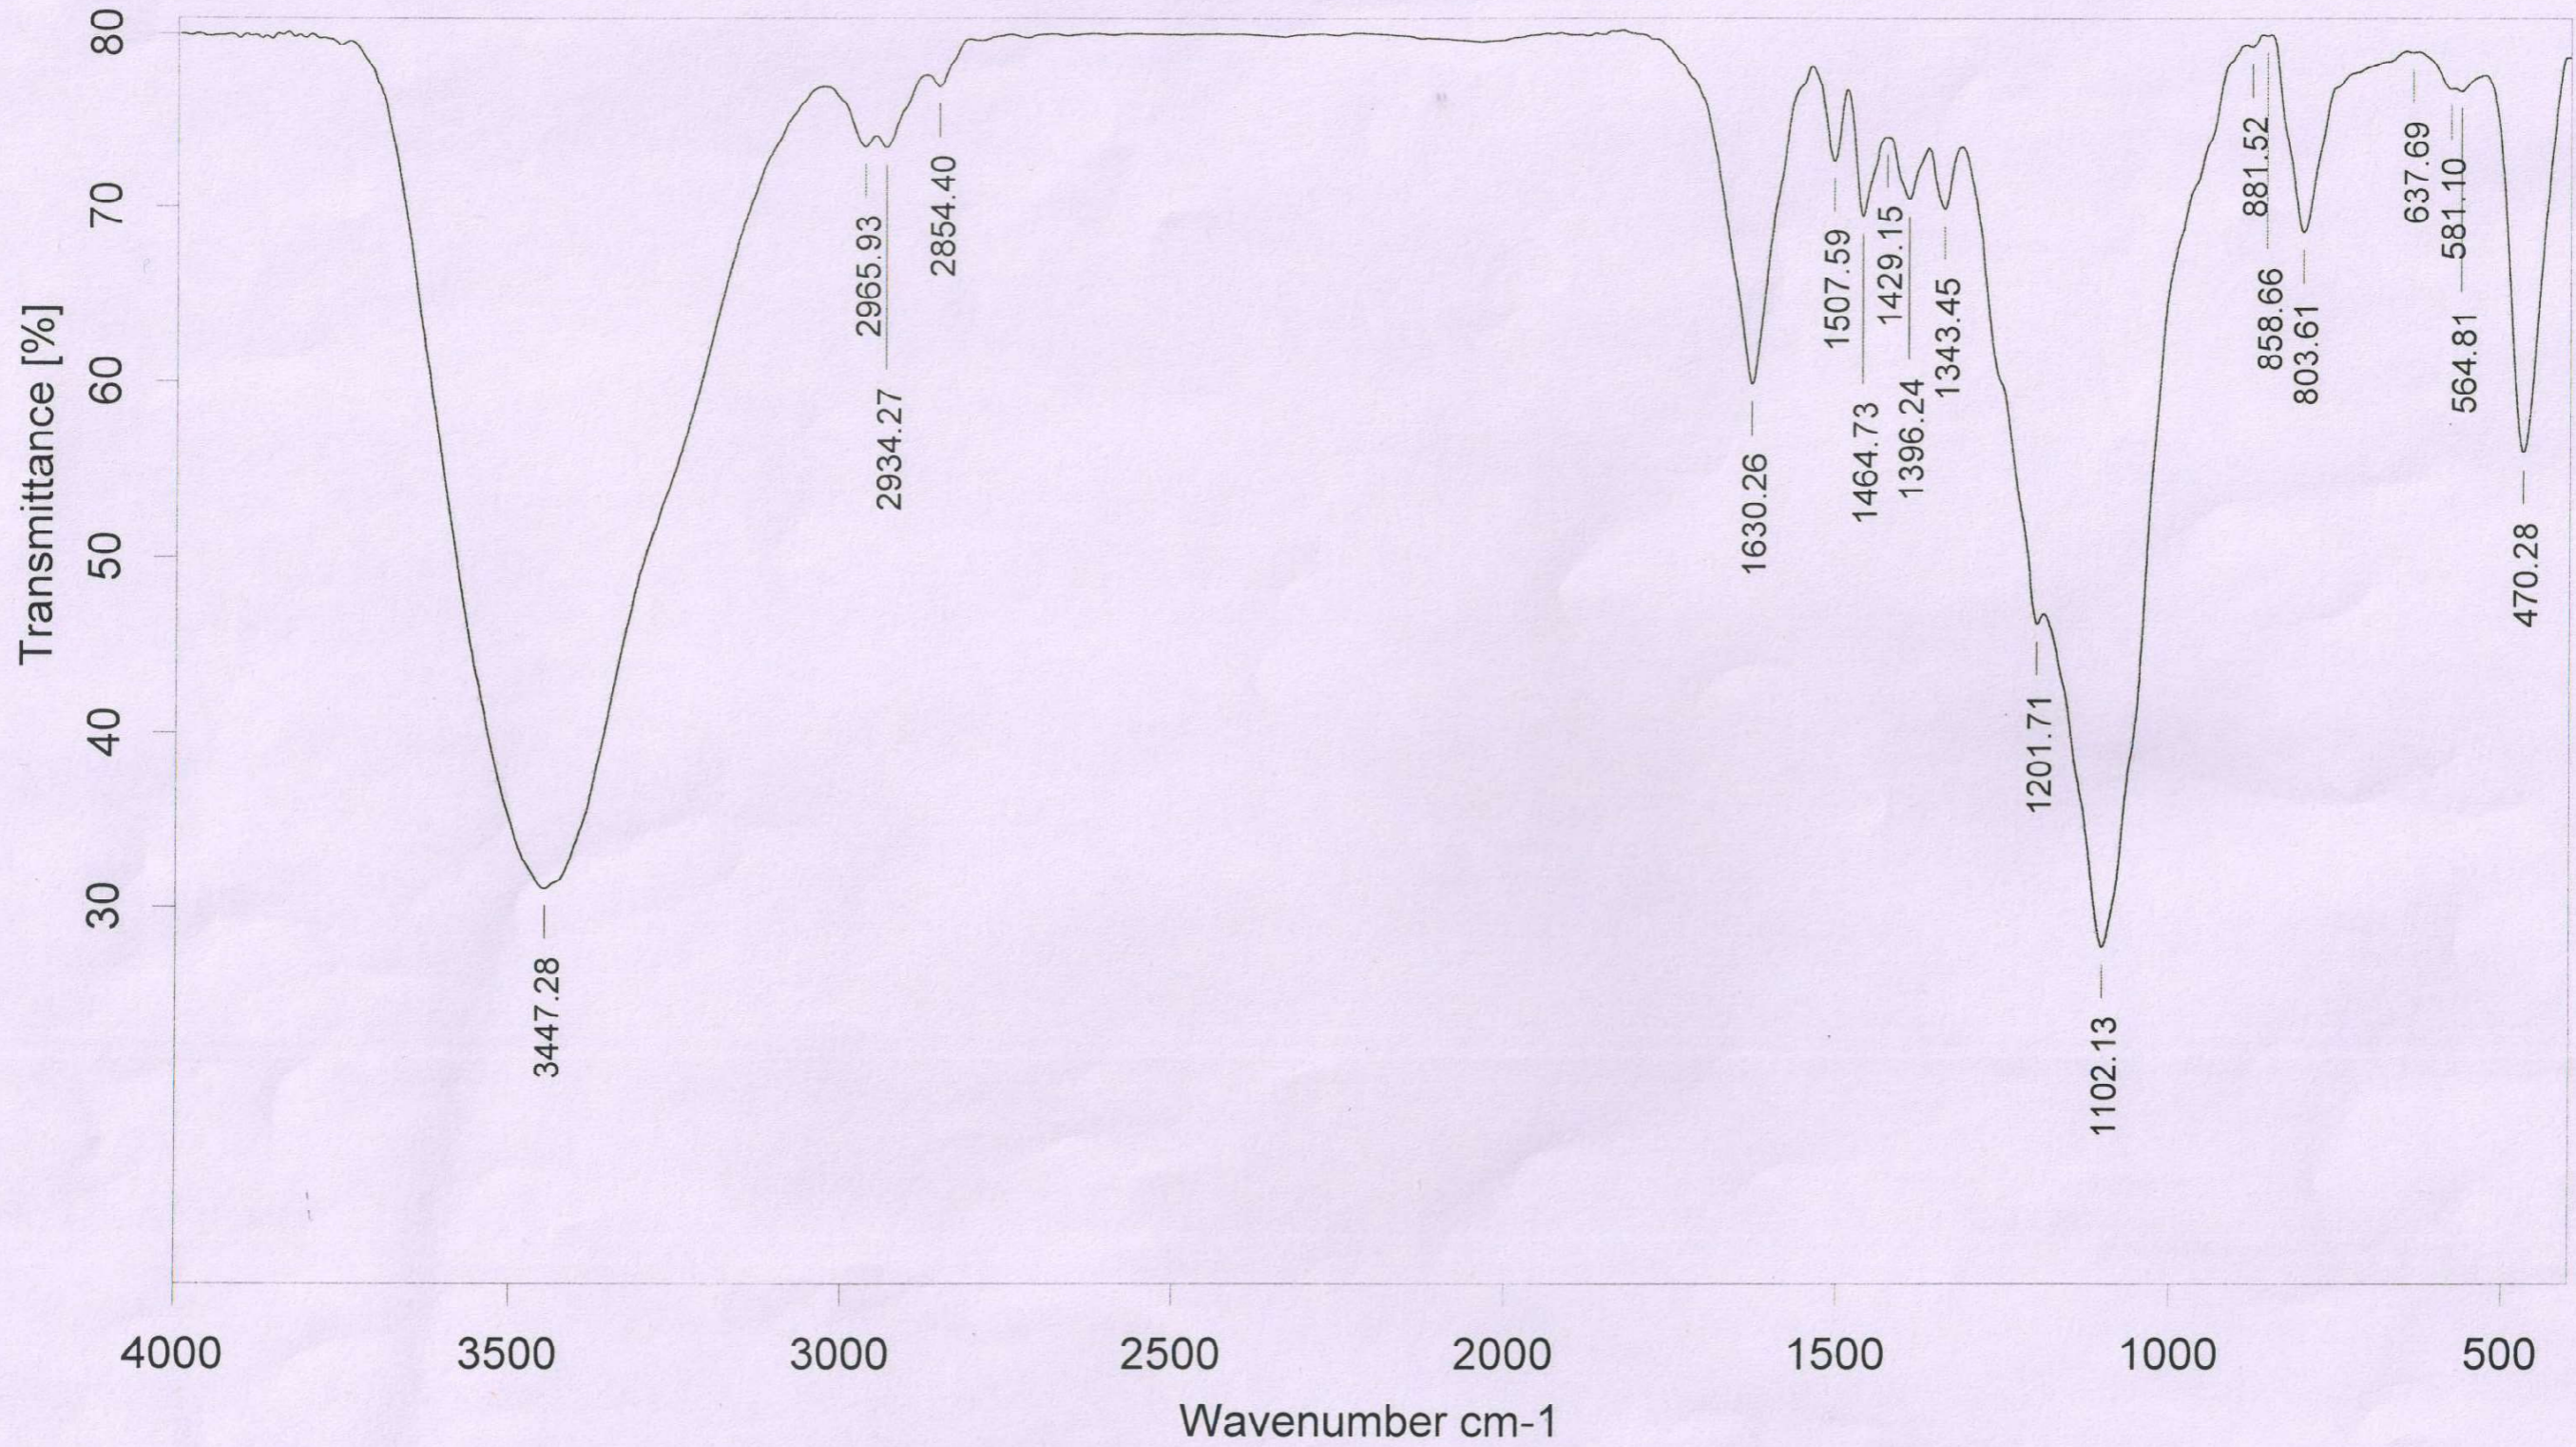

|                       |                                     |                          |
|-----------------------|-------------------------------------|--------------------------|
| Sample : wtflr-80a    | Frequency Range : 399.246 - 3996.32 | Measured on : 28/03/2018 |
| Technique : KBr       | Resolution : 4                      | Instrument : Tensor27    |
| Filename : 180328IR.4 | Zerofilling : 2                     | Sample Scans : 16        |
|                       | Acquisition : Double Sided,For      |                          |

Figure S13. UV spectrum of thalfoetine B (2)

SHIMADZU UV-2401PC

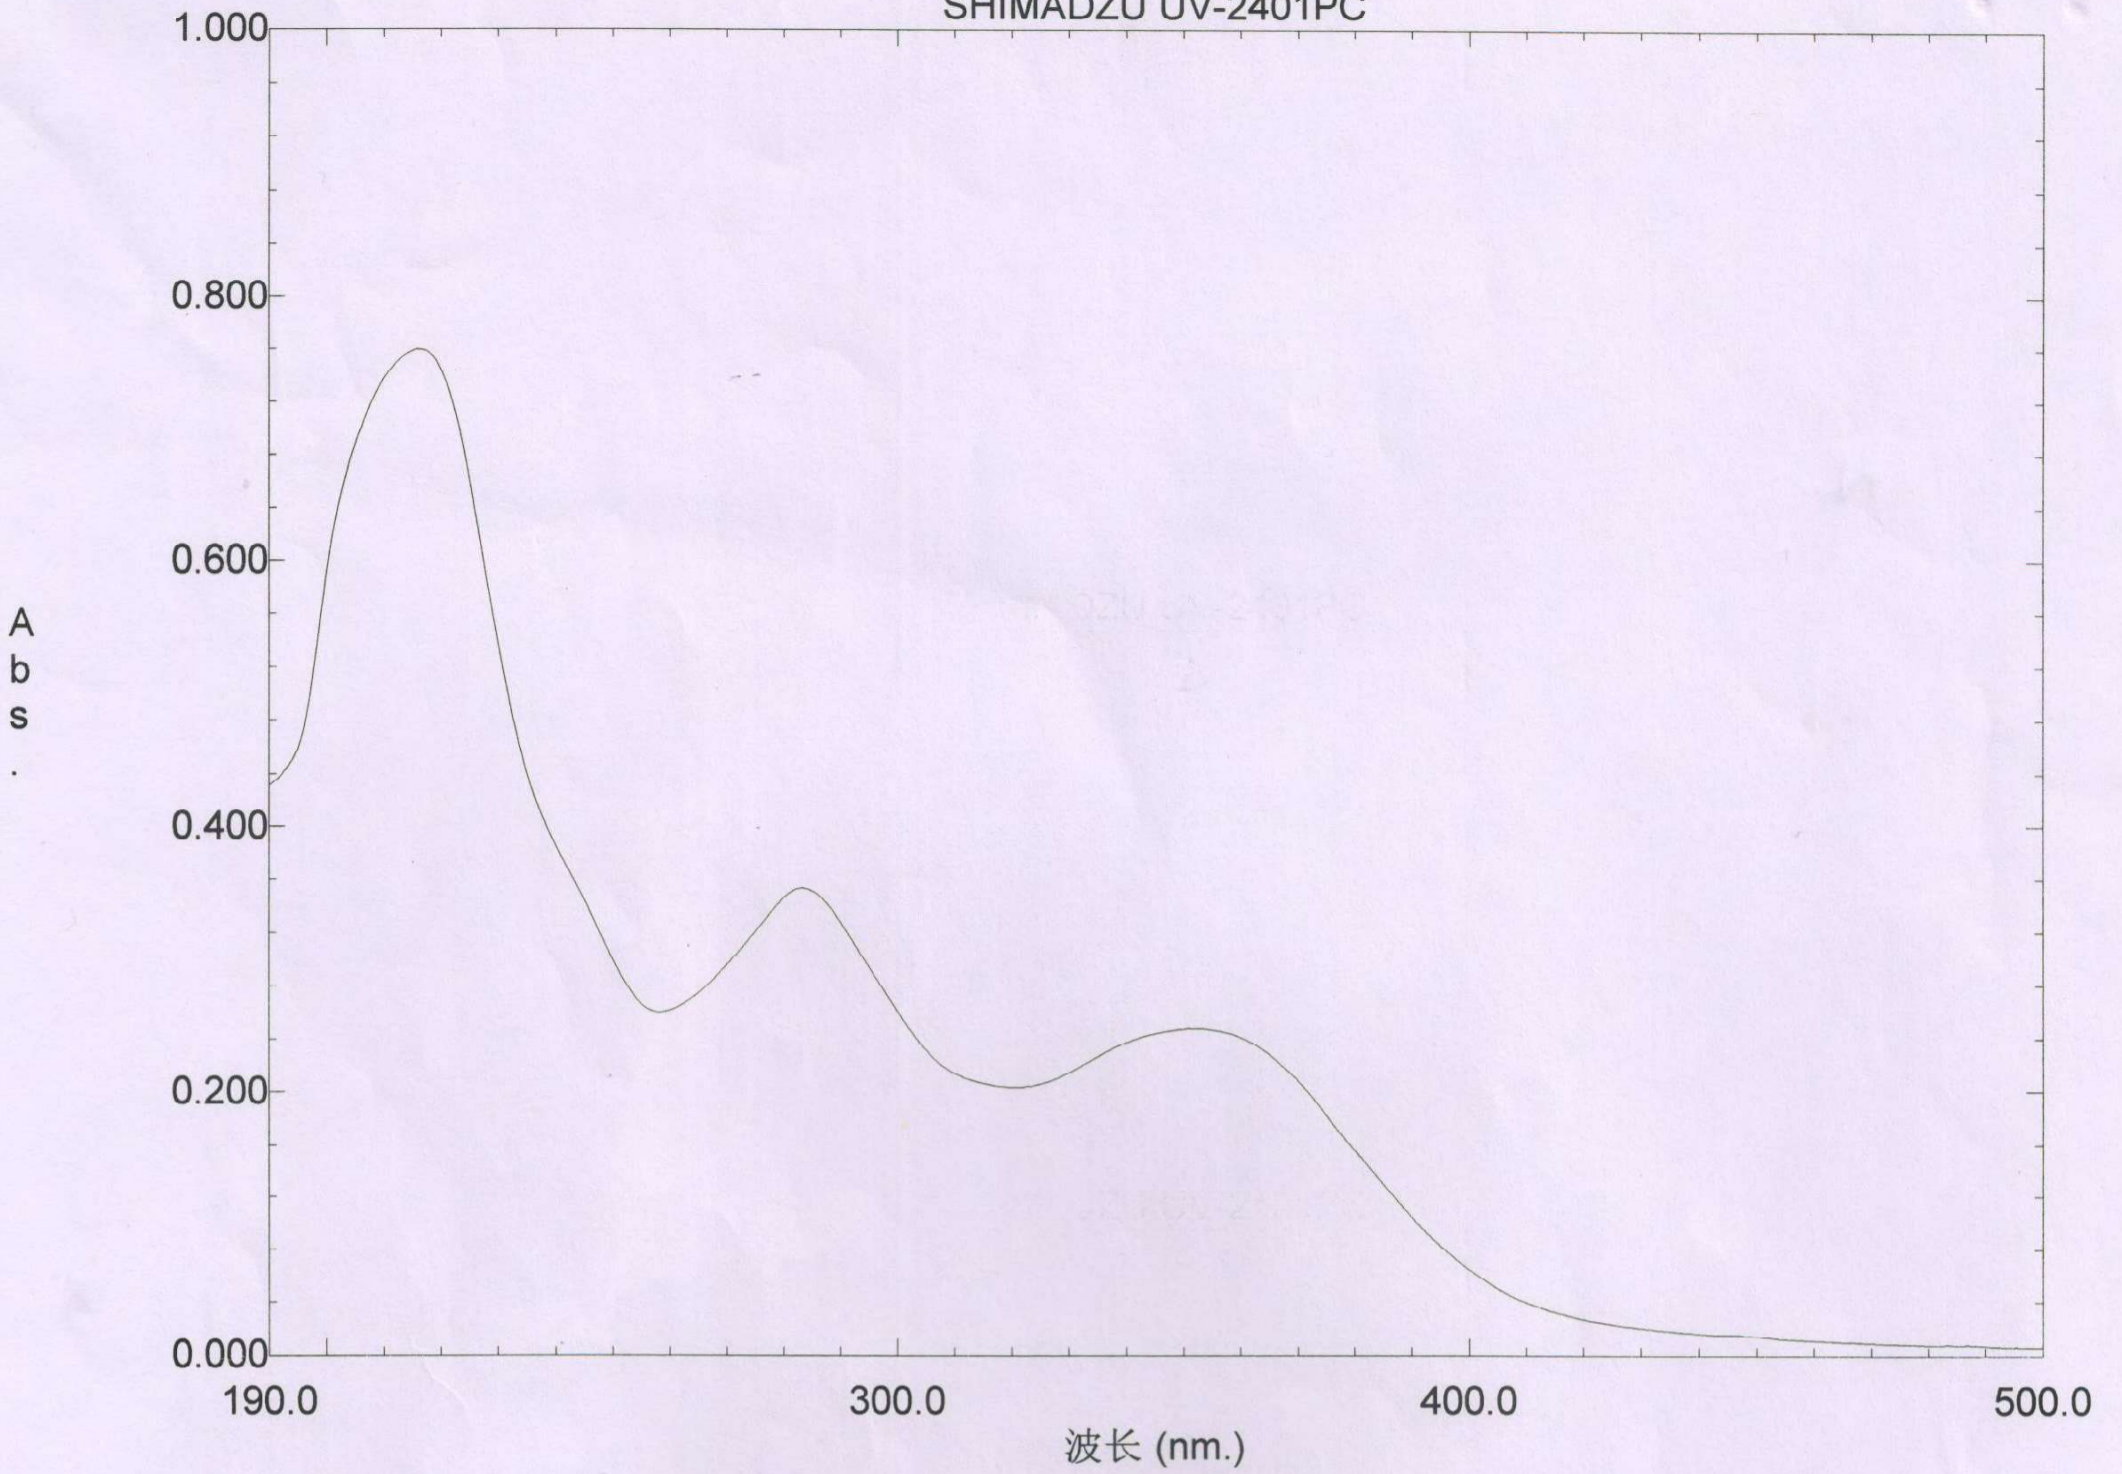

文件名: 18012902  
样品名称: WTFLR-80A

18012902

创建于: 11:30 18-01-29  
数据: 原始

样品浓度: 0.0227毫克/毫升  
溶剂: 甲醇

测量模式: Abs.  
扫描速度: 中速  
狭缝: 5.0  
采样间隔: 0.5

| 否. | 波长 (nm.) | Abs.   |
|----|----------|--------|
| 1  | 352.00   | 0.2476 |
| 2  | 283.50   | 0.3526 |
| 3  | 216.00   | 0.7592 |

Figure S14. <sup>1</sup>H NMR spectrum of thalfoetine B (2) in DMSO-d<sub>6</sub> (600 MHz)

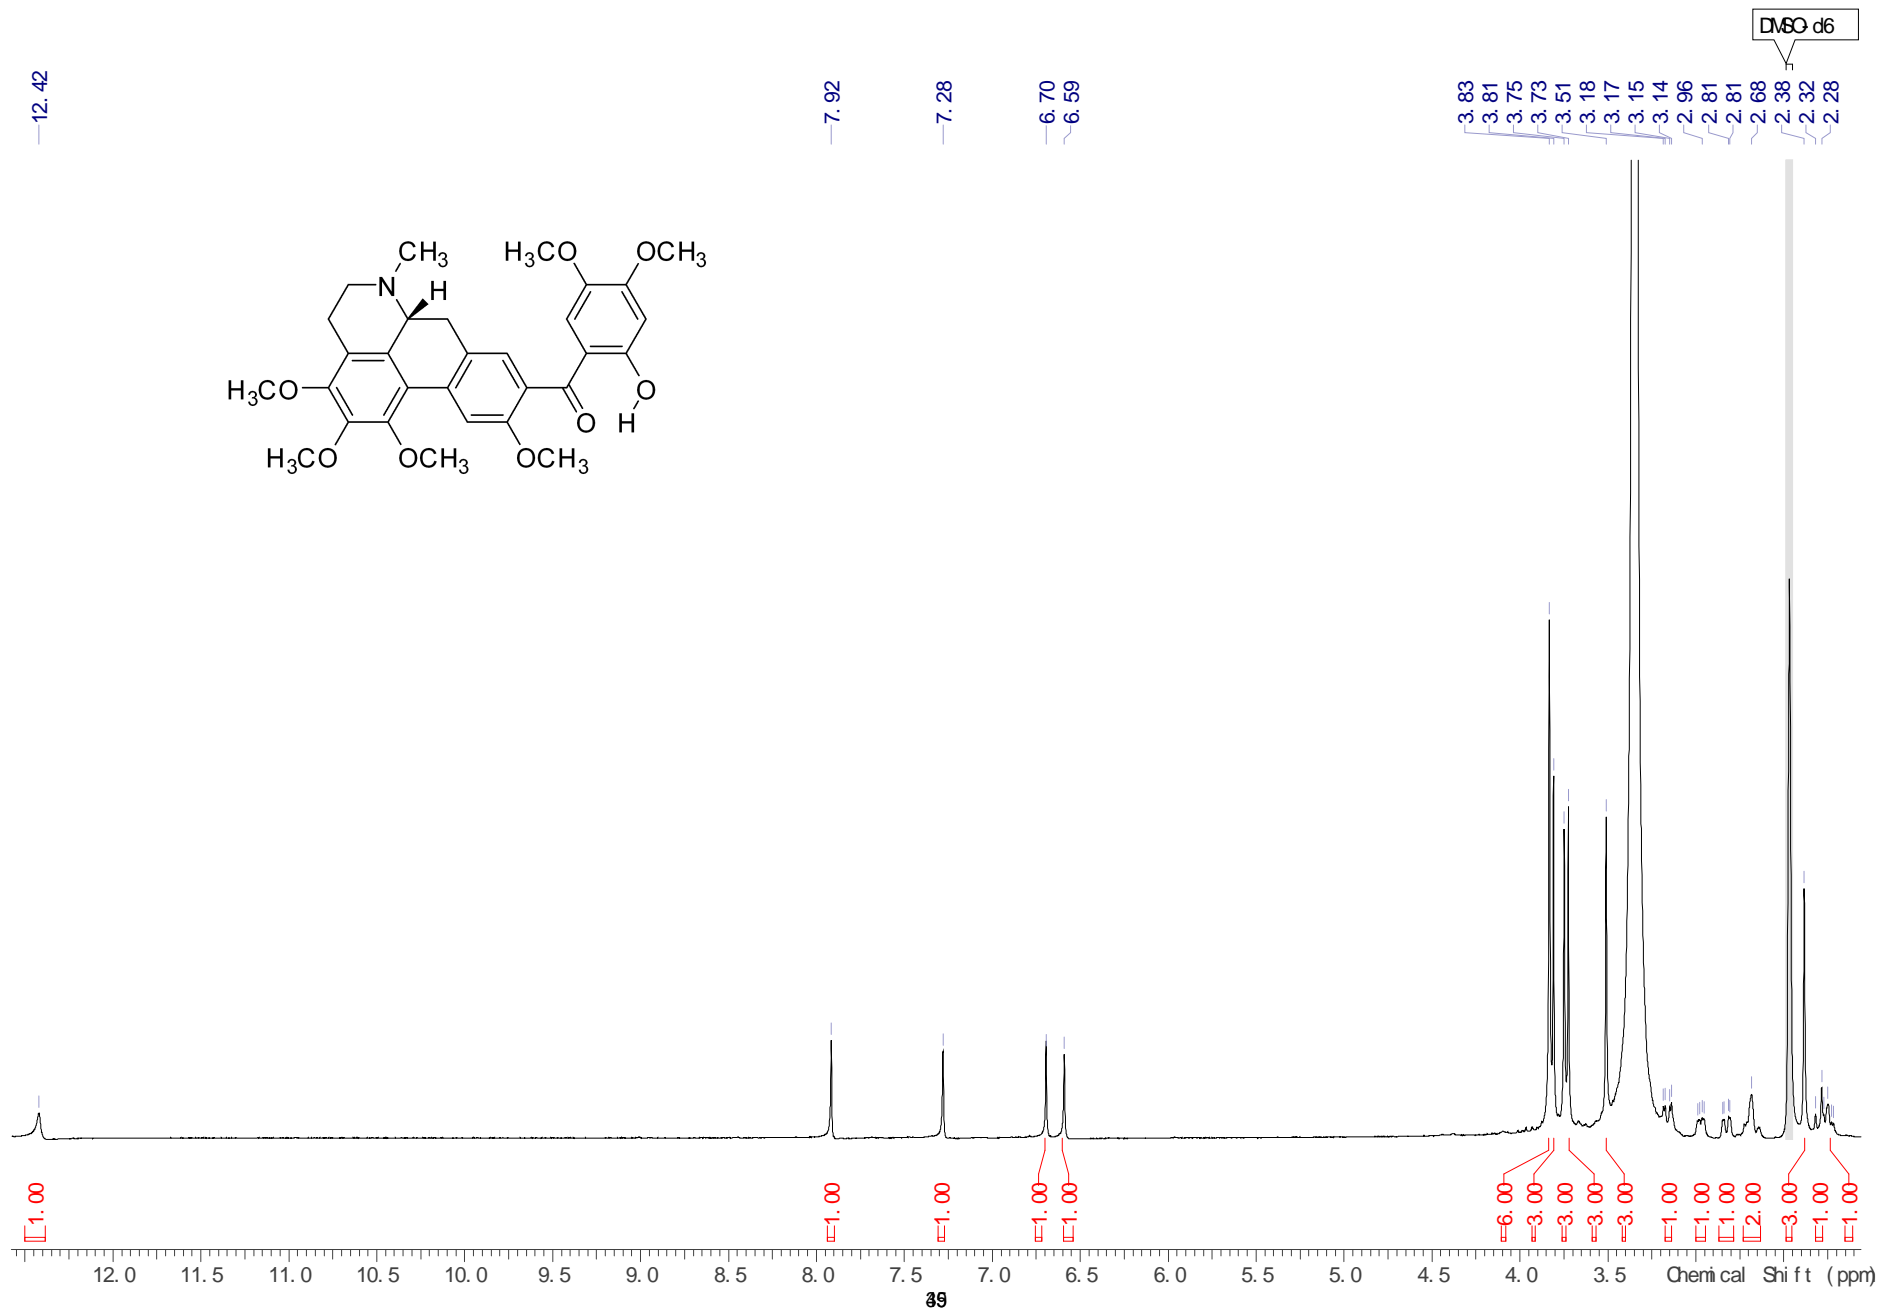

Figure S15.  $^{13}\text{C}$  NMR spectrum of thalfoetine B (**2**) in  $\text{DMSO-}d_6$  (150 MHz)

44 13C DMSO 001. 1r. esp

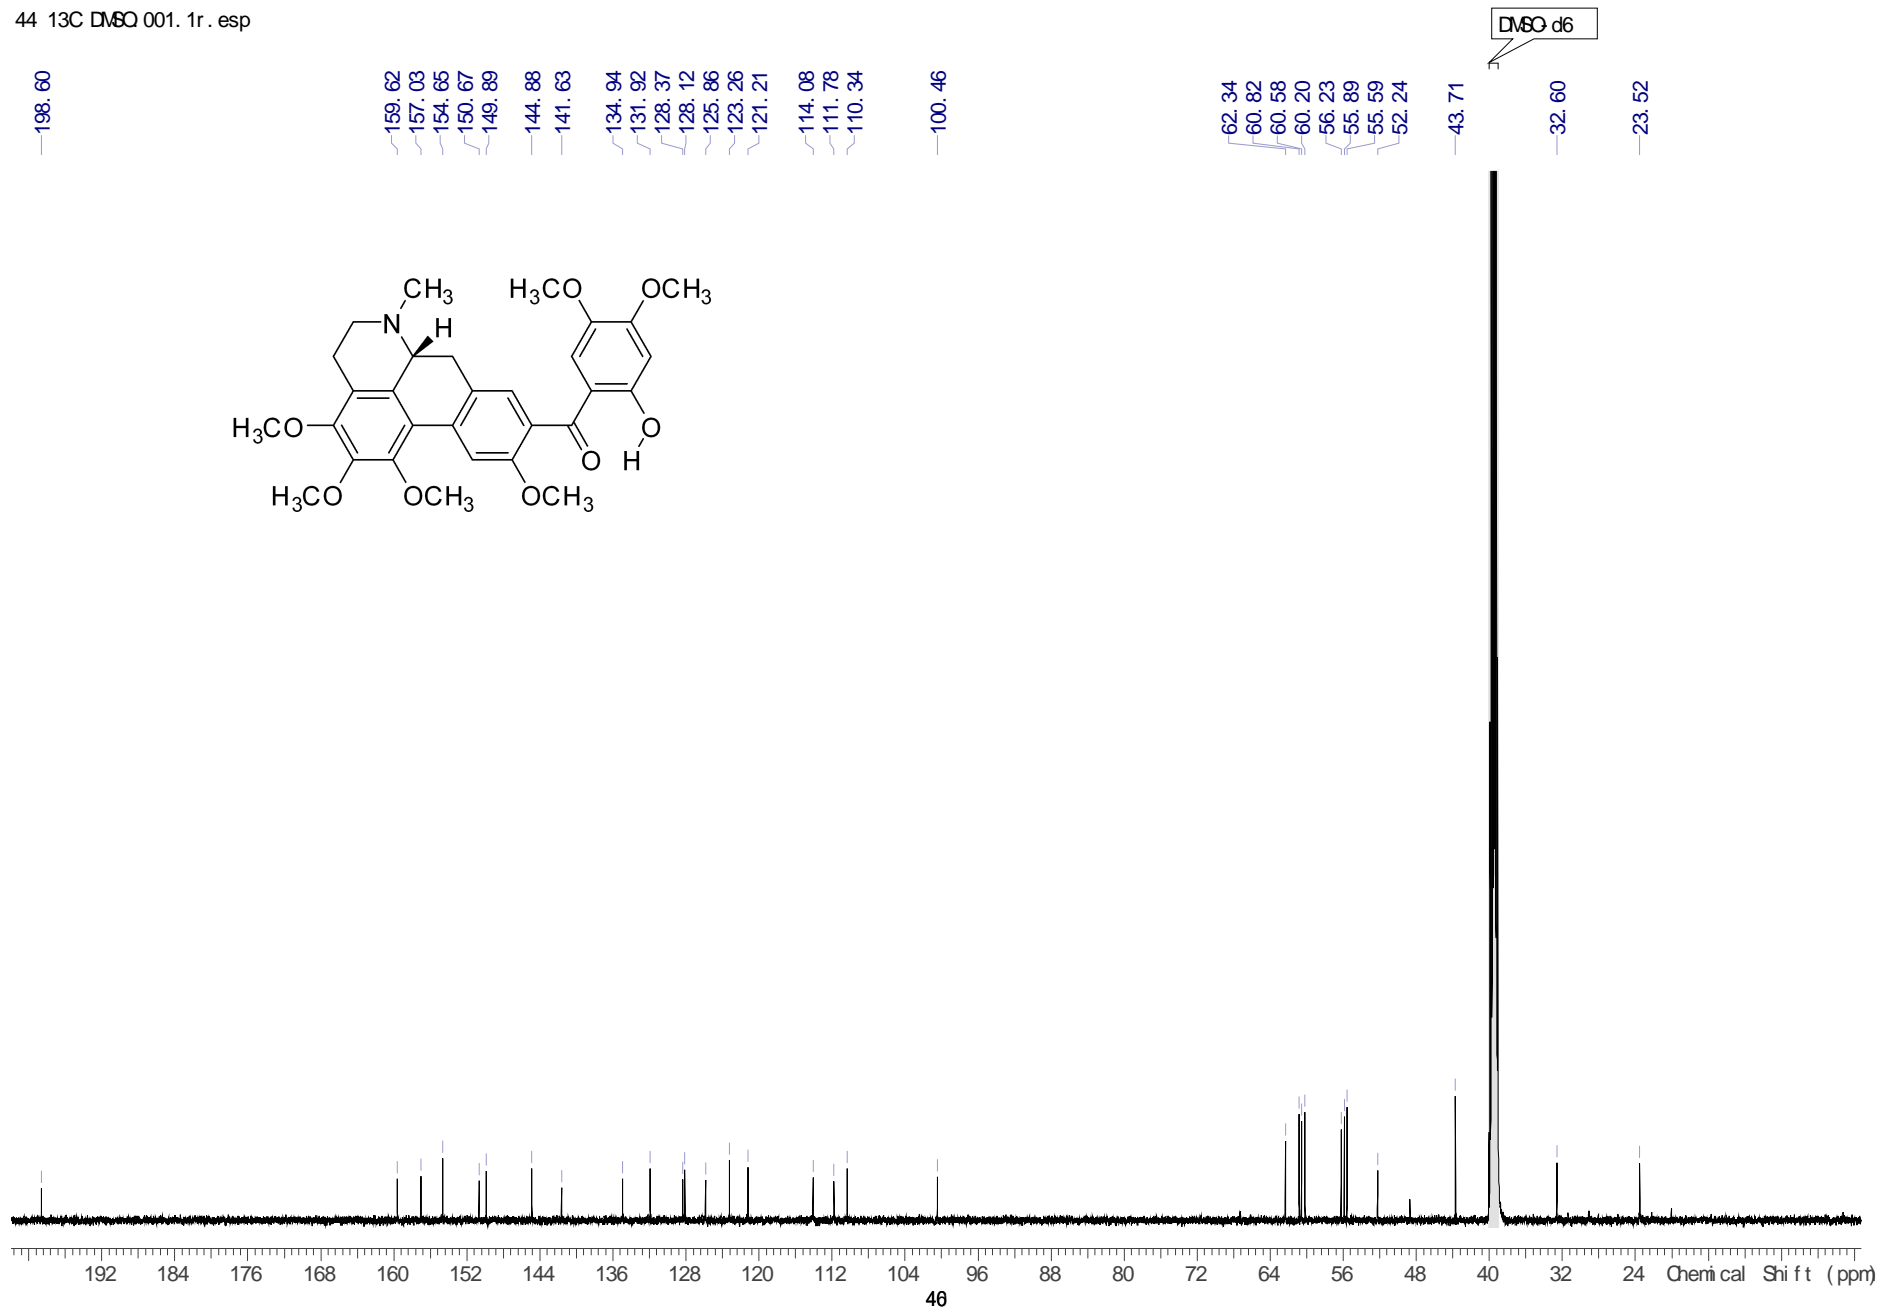

Figure S15-1. DEPT 90 spectrum of thalfoetine B (2) in DMSO-*d*<sub>6</sub> (150 MHz)

42\_90\_dms0.001.1r.esp

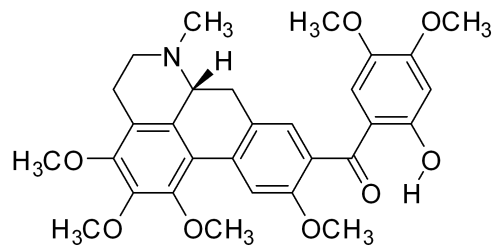

127.87  
113.82  
110.09  
100.21  
62.09

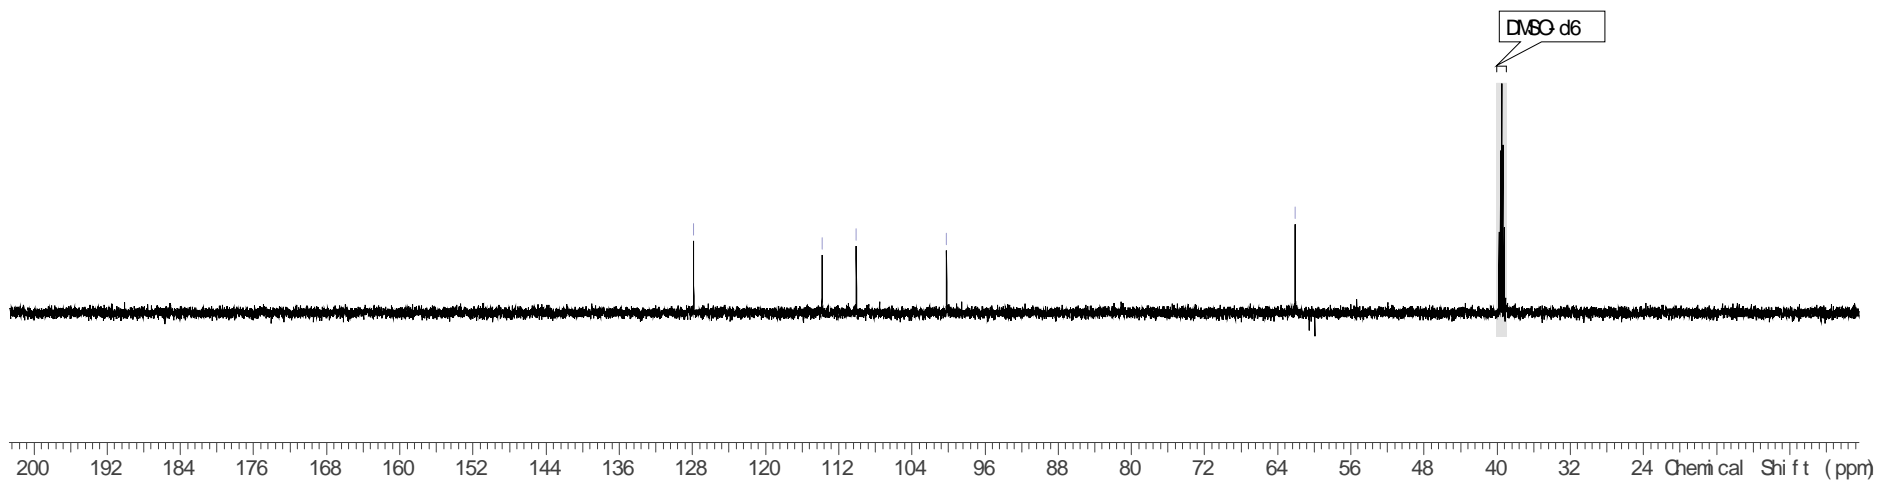

Figure S15-2. DEPT 135 spectrum of thalfoetine B (**2**) in DMSO-*d*<sub>6</sub> (150 MHz)

43 135 dms0.001.1r.esp

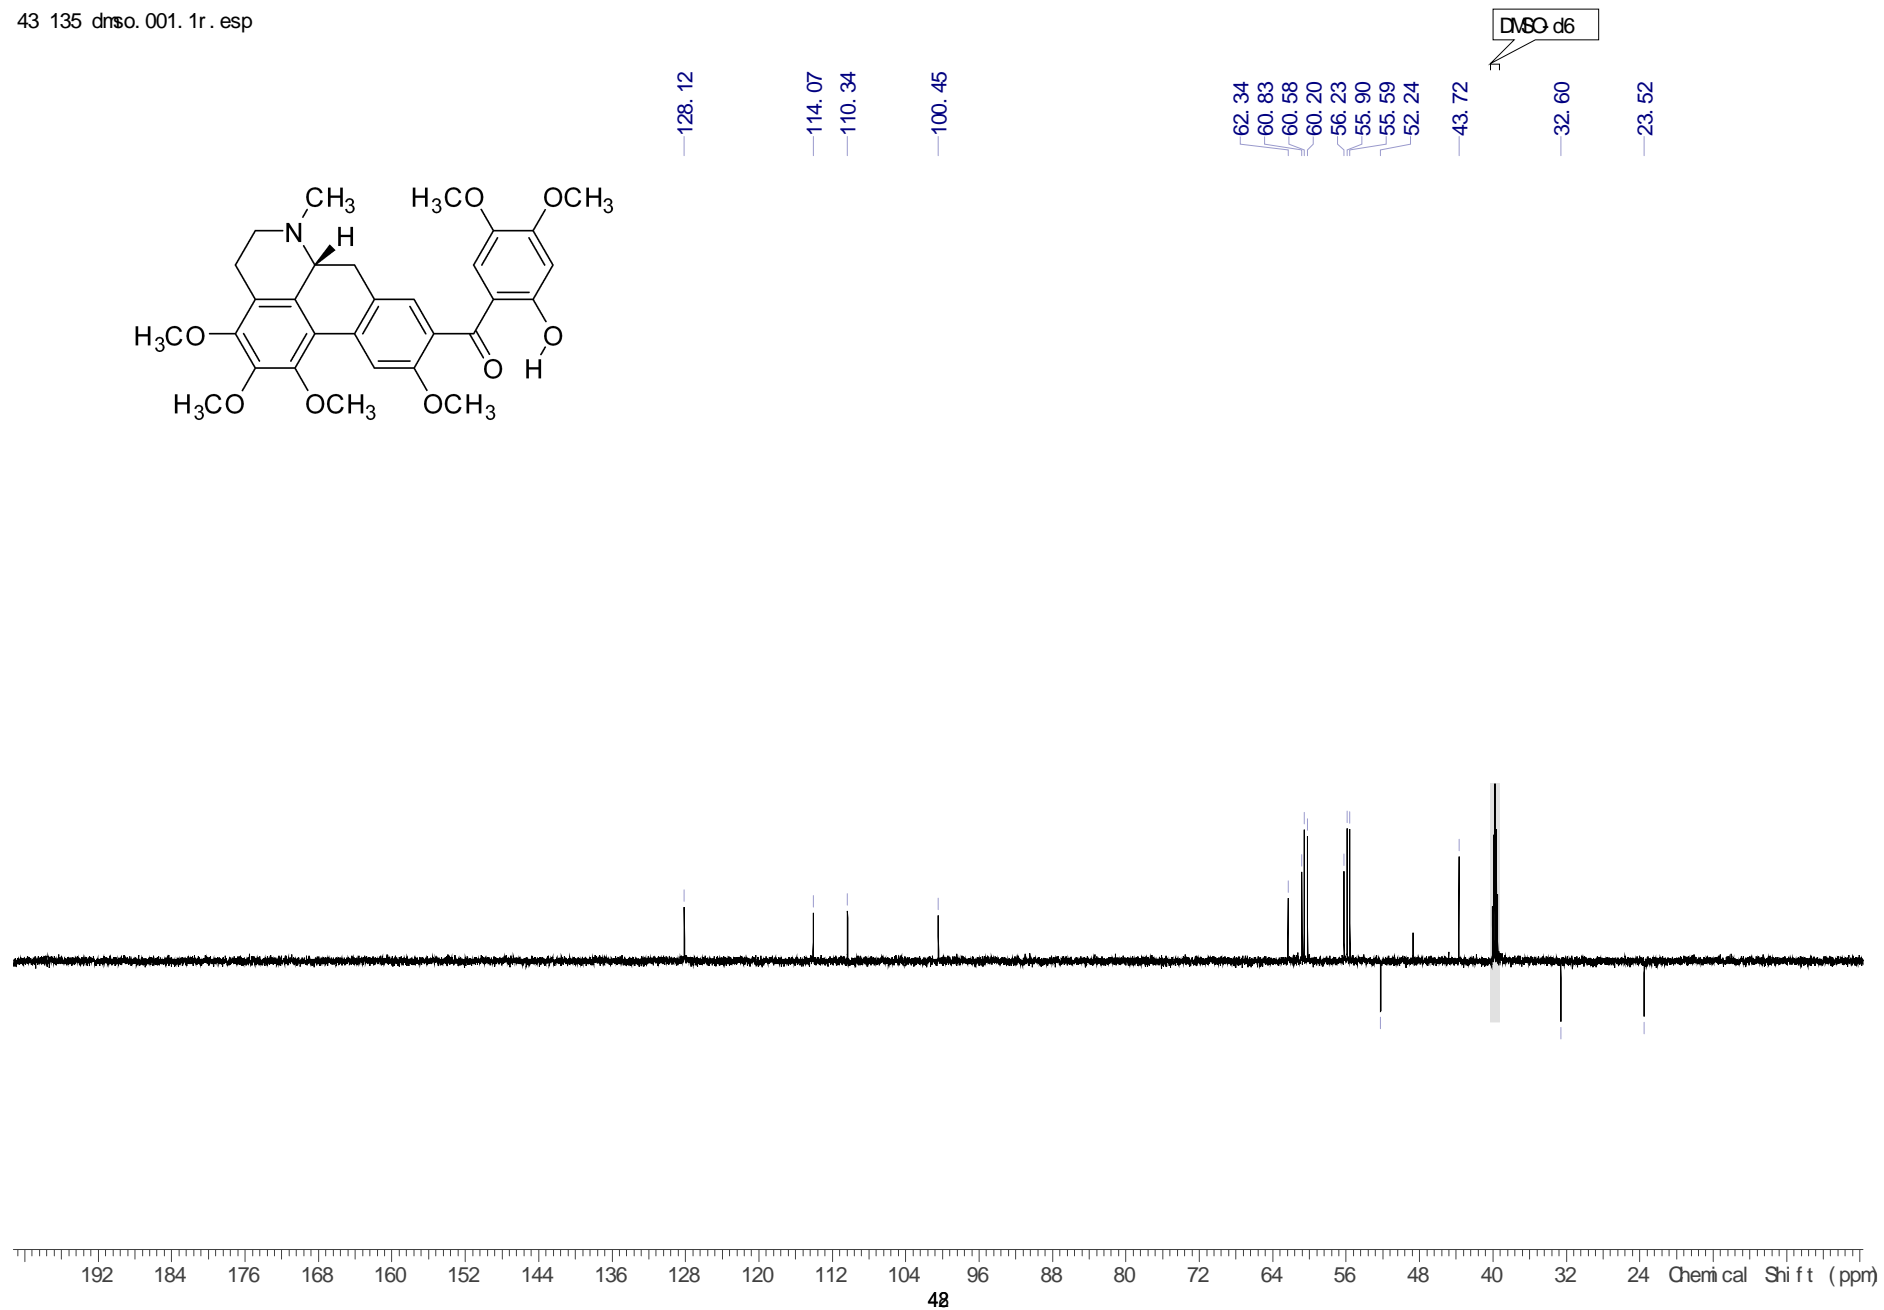



Figure S16. HSQC spectrum of thalfoetine B (**2**) in DMSO- $d_6$  (600 MHz)

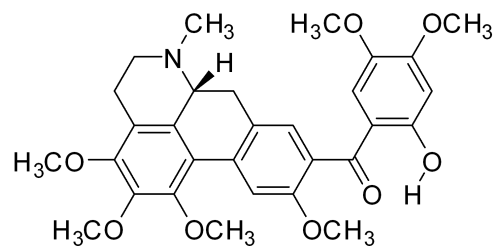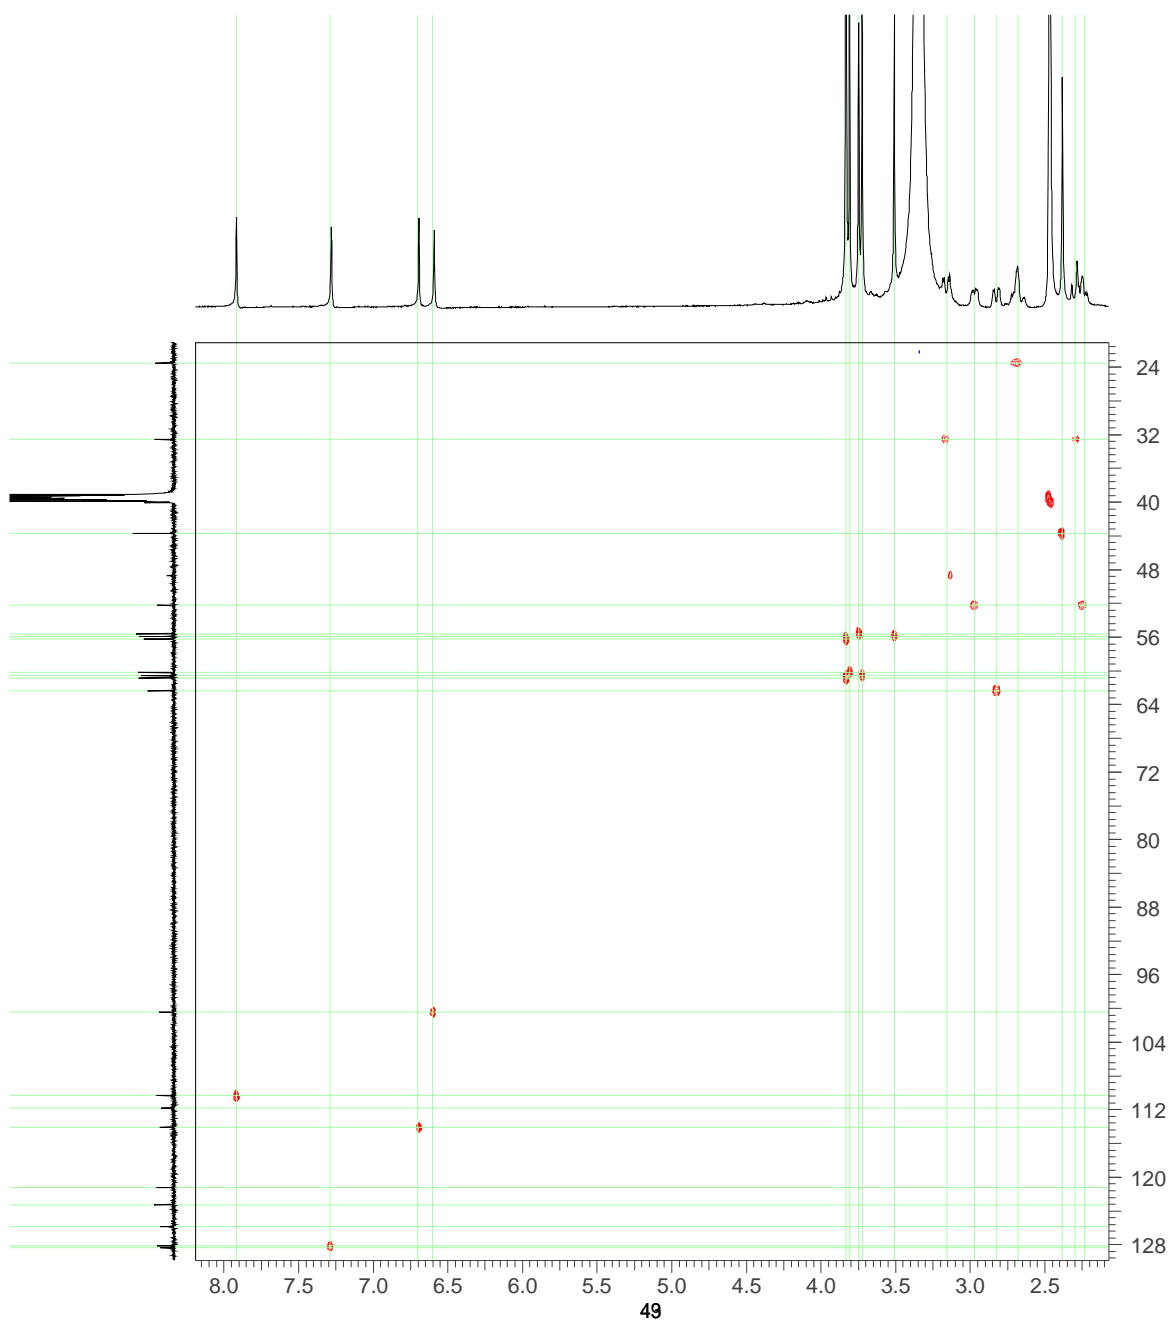

Figure S16-1. The partially enlarged HSQC spectrum of thalfoetine B (**2**)

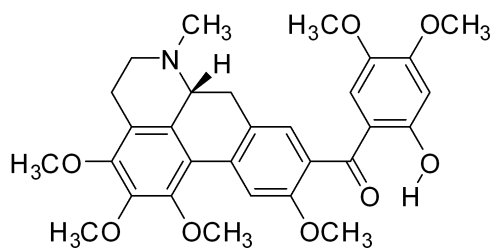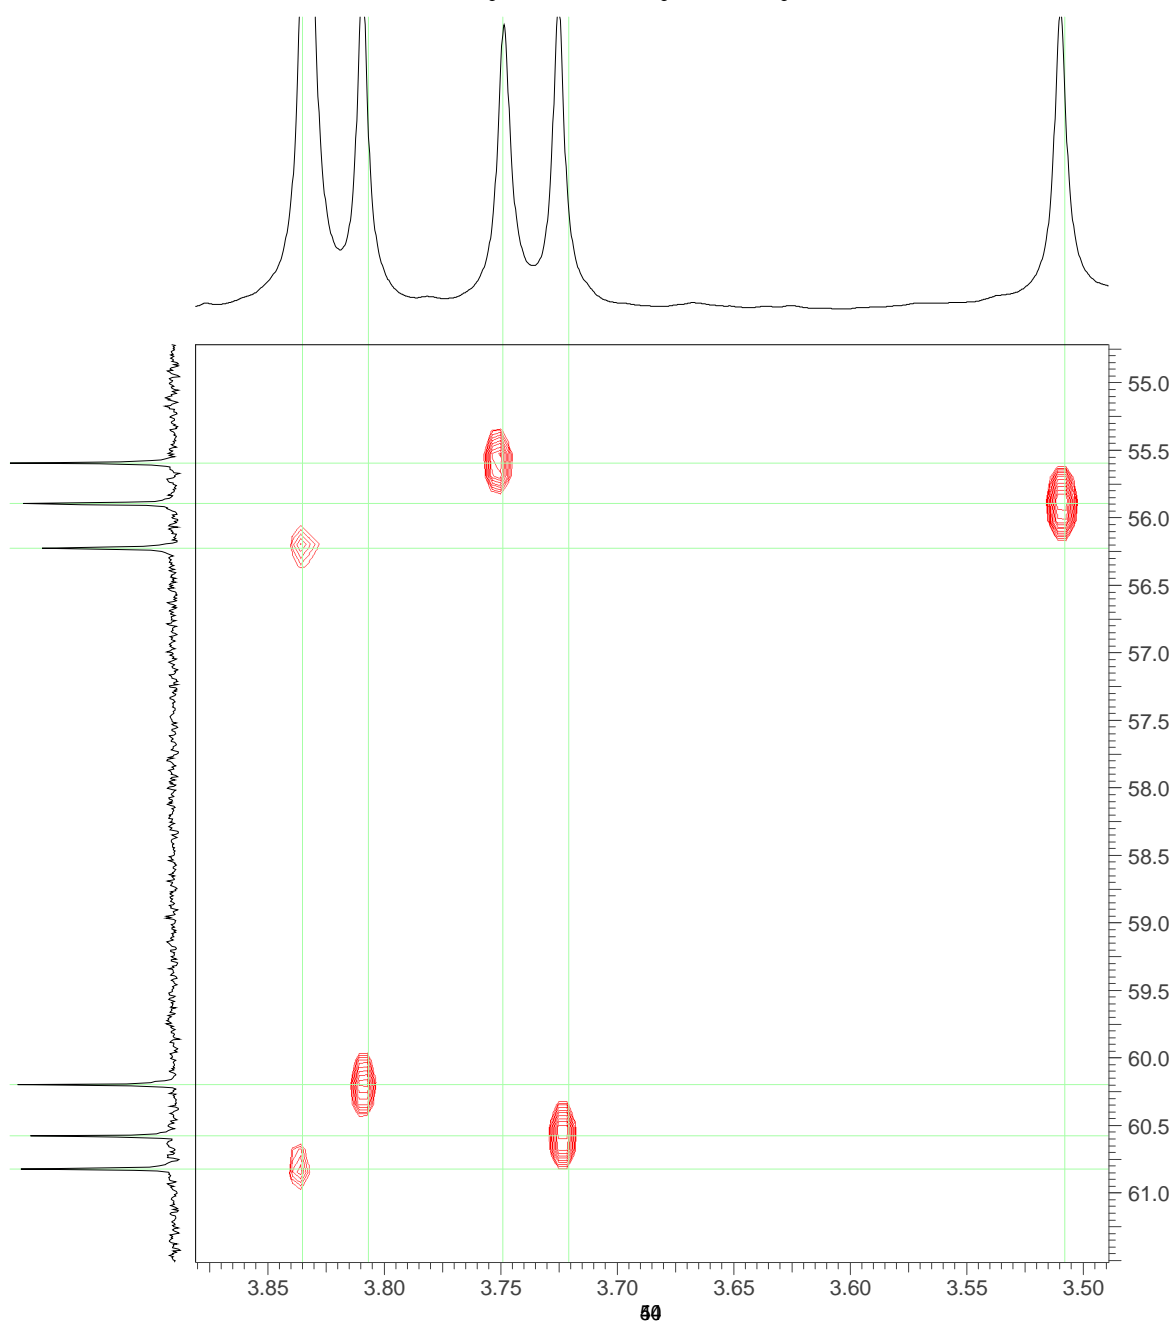

Figure S16-2. The partially enlarged HSQC spectrum of thalfoetine B (2)

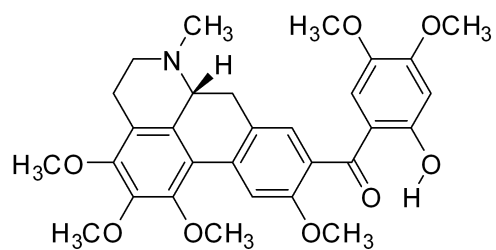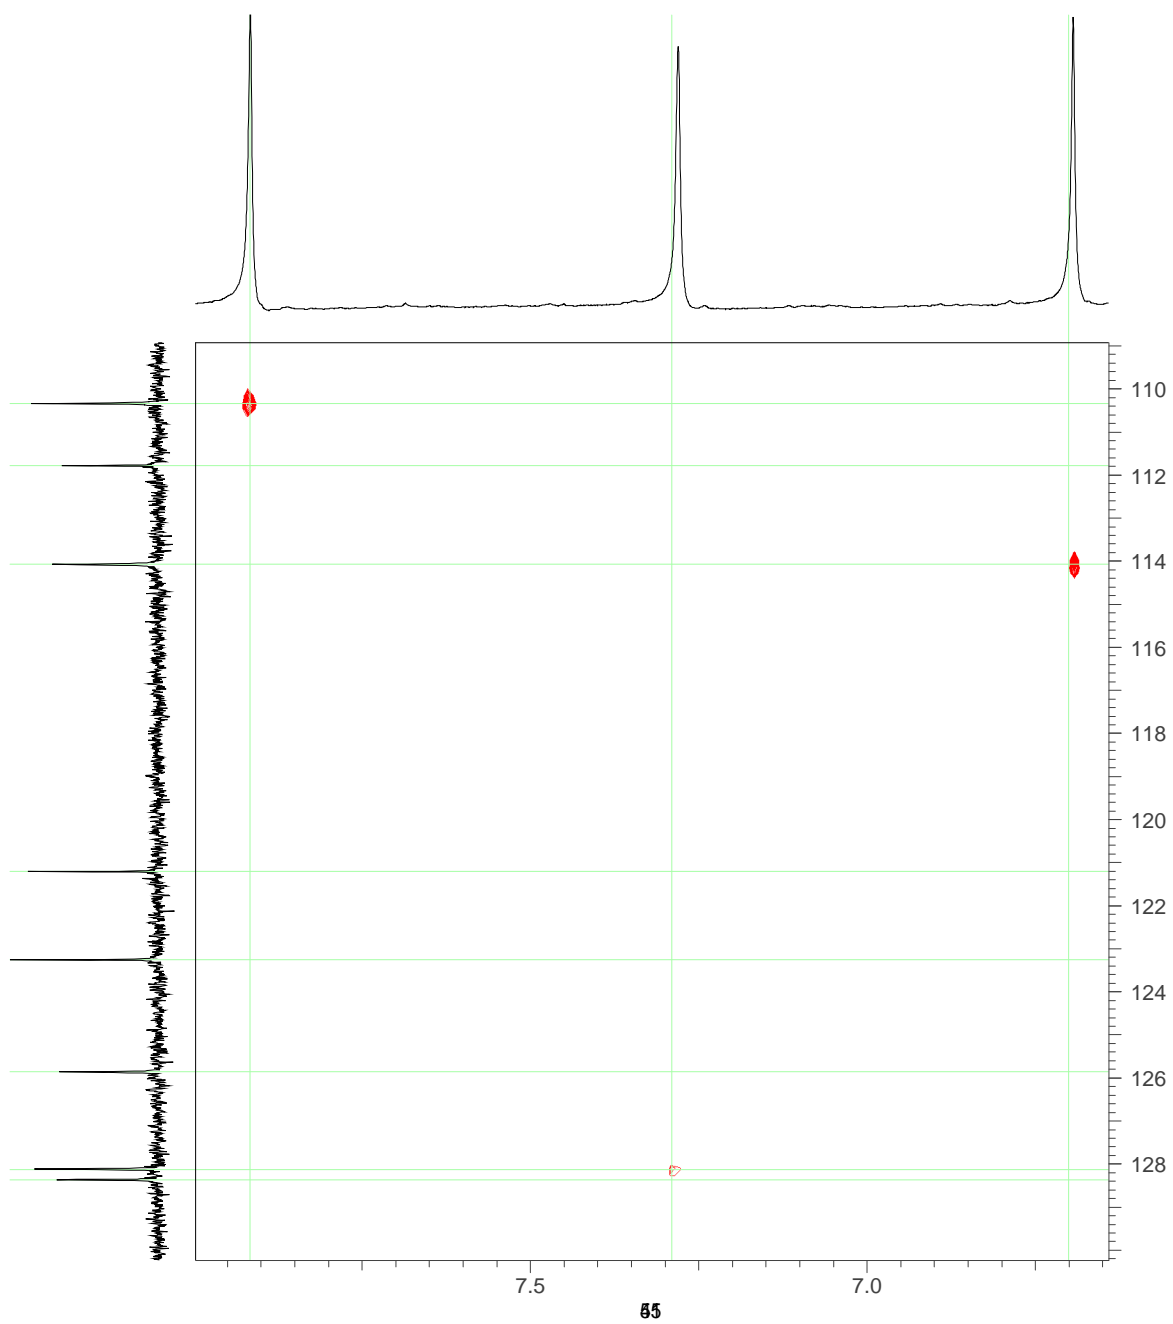

Figure S17. HMBC spectrum of thalfoetine B (2) in DMSO- $d_6$  (600 MHz)

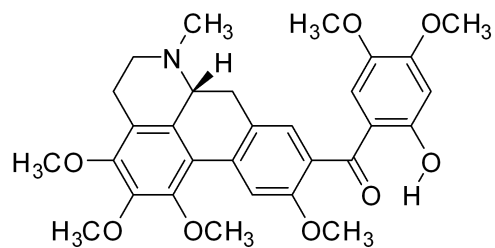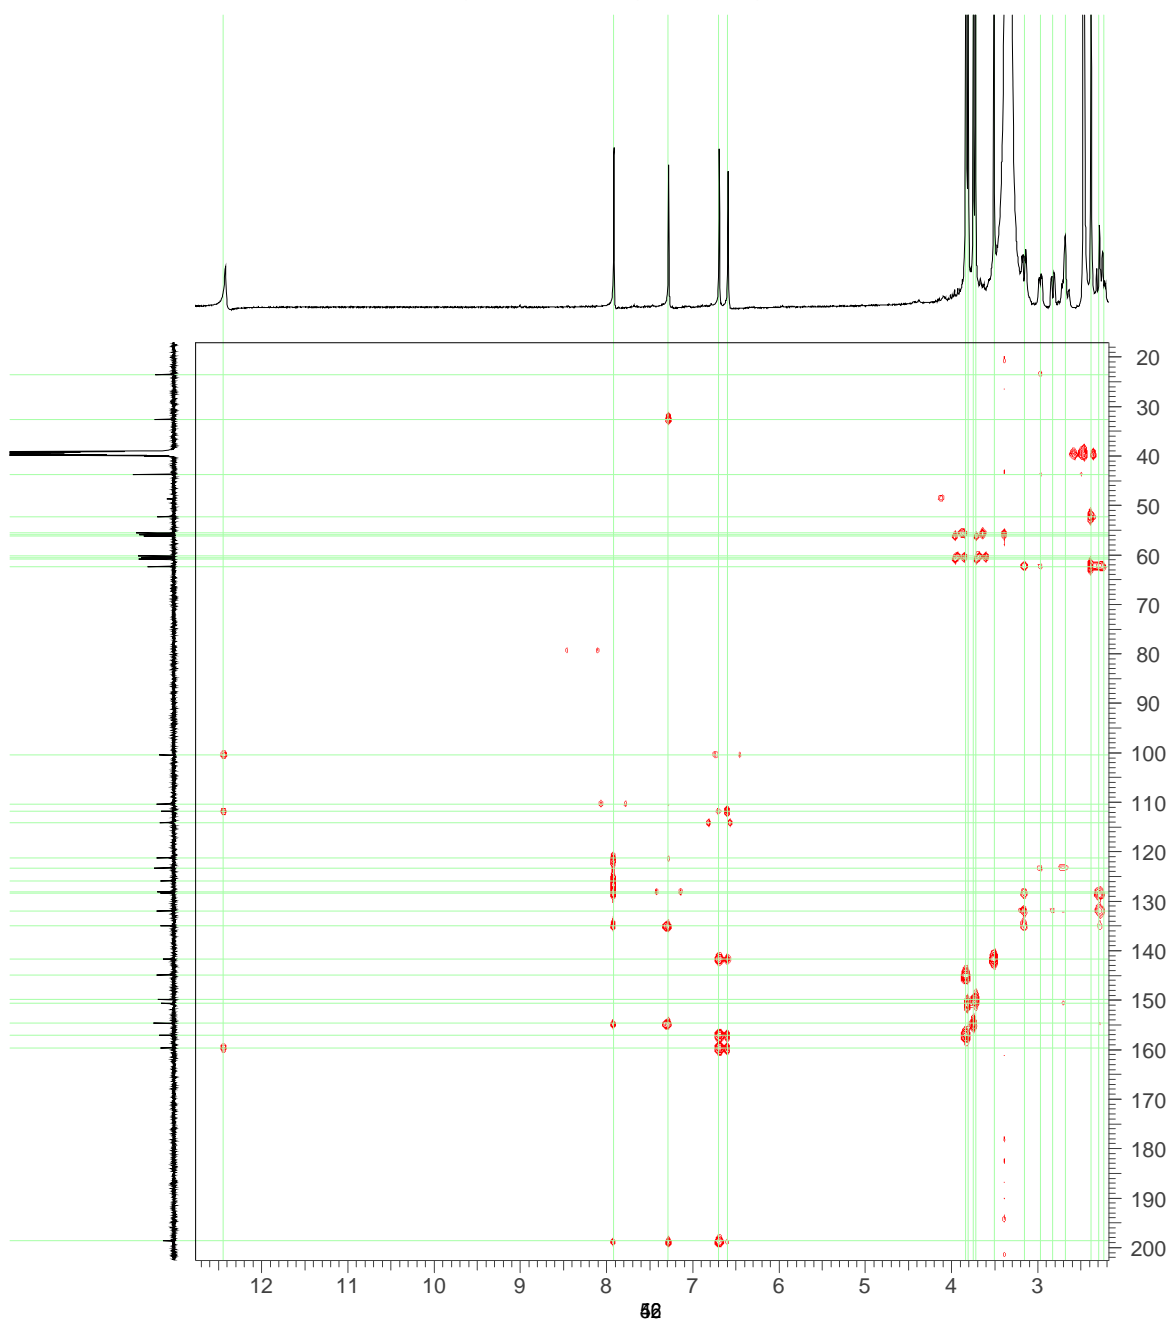

Figure S17-1. The partially enlarged HMBC spectrum of thalfoetine B (2)

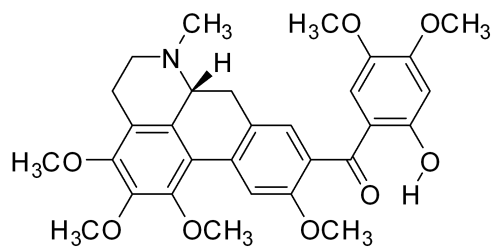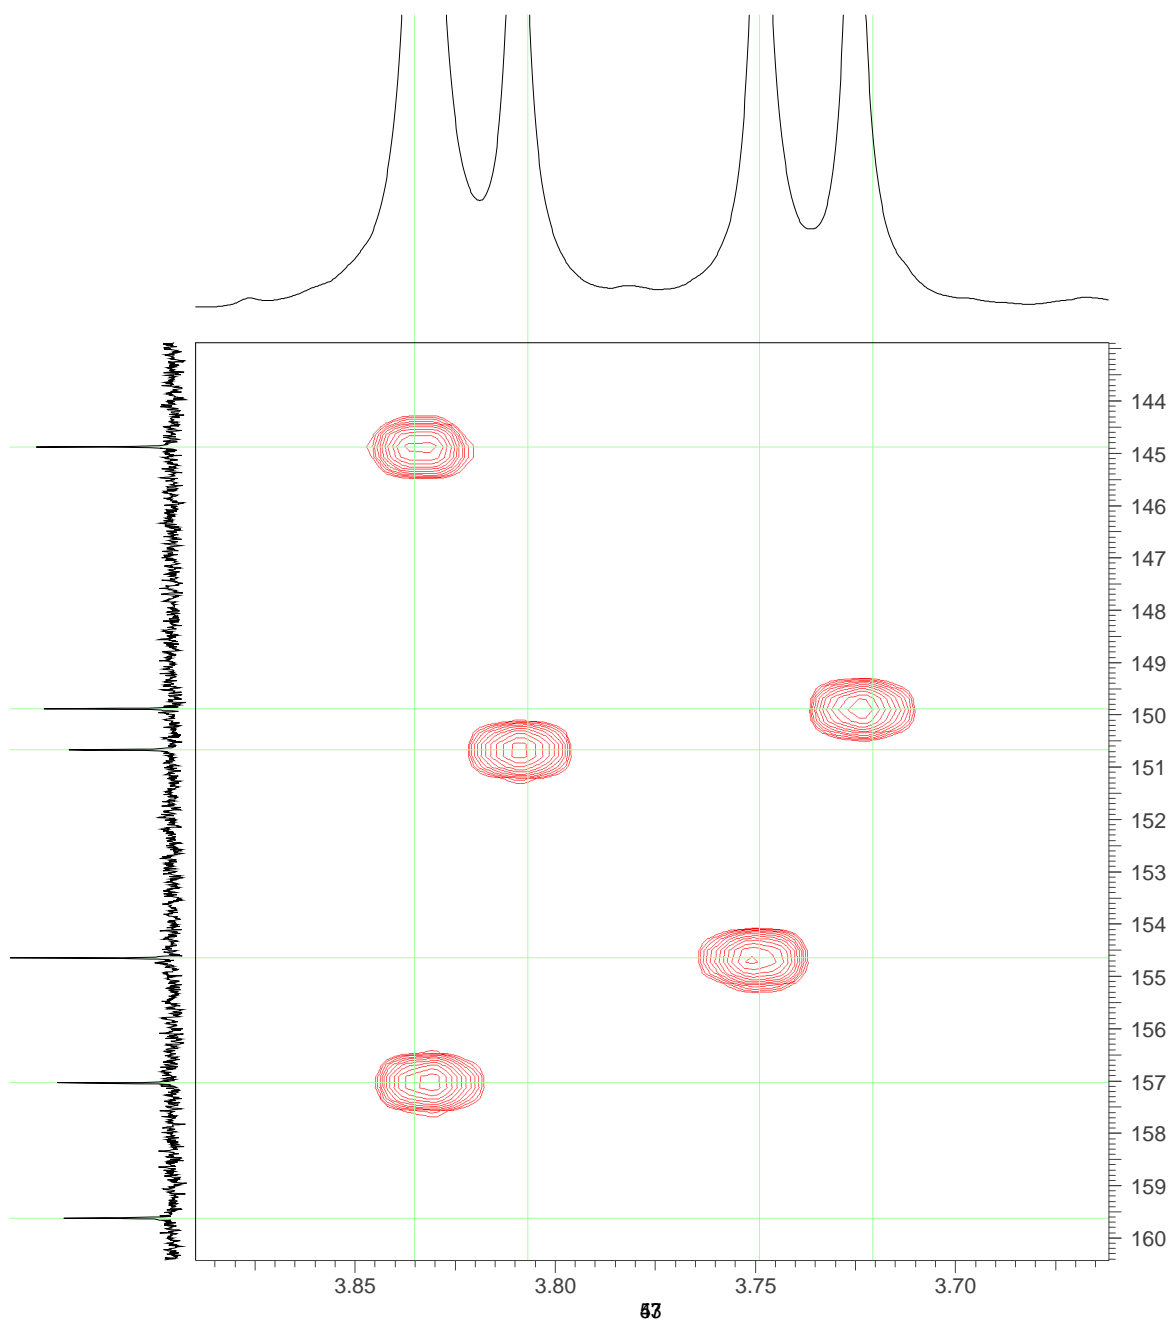

Figure S17-2. The partially enlarged HMBC spectrum of thalfoetine B (2)

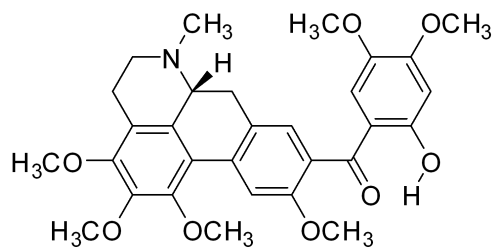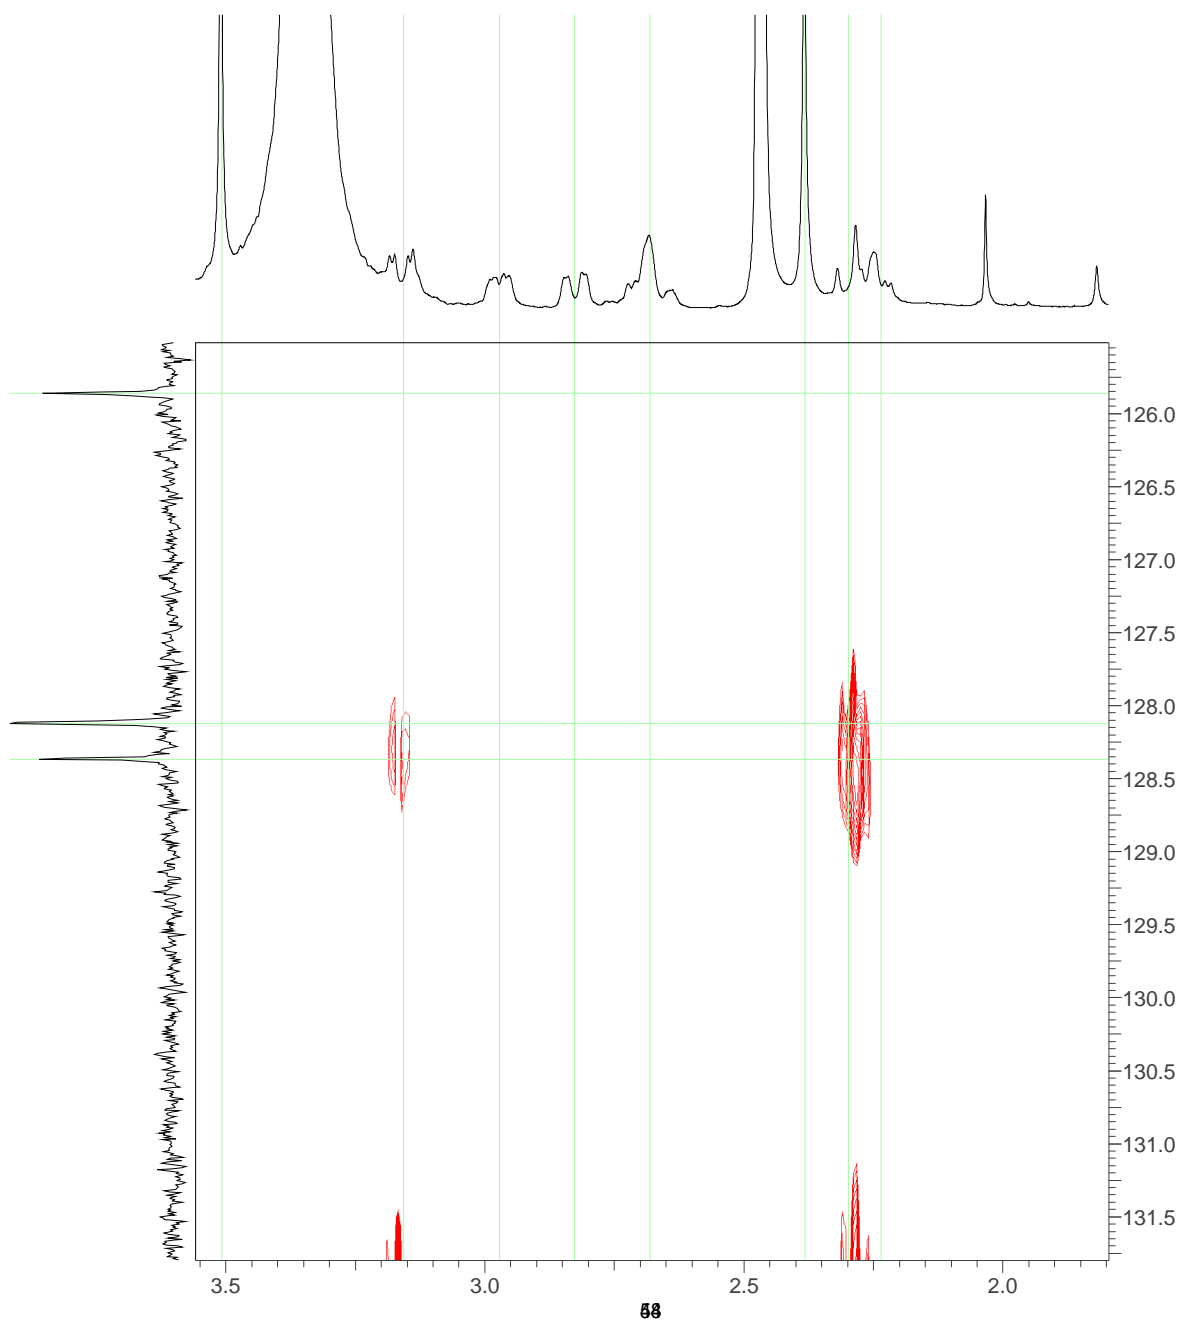

Figure S17-3. The partially enlarged HMBC spectrum of thalfoetine B (2)

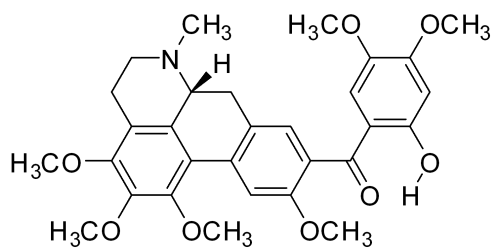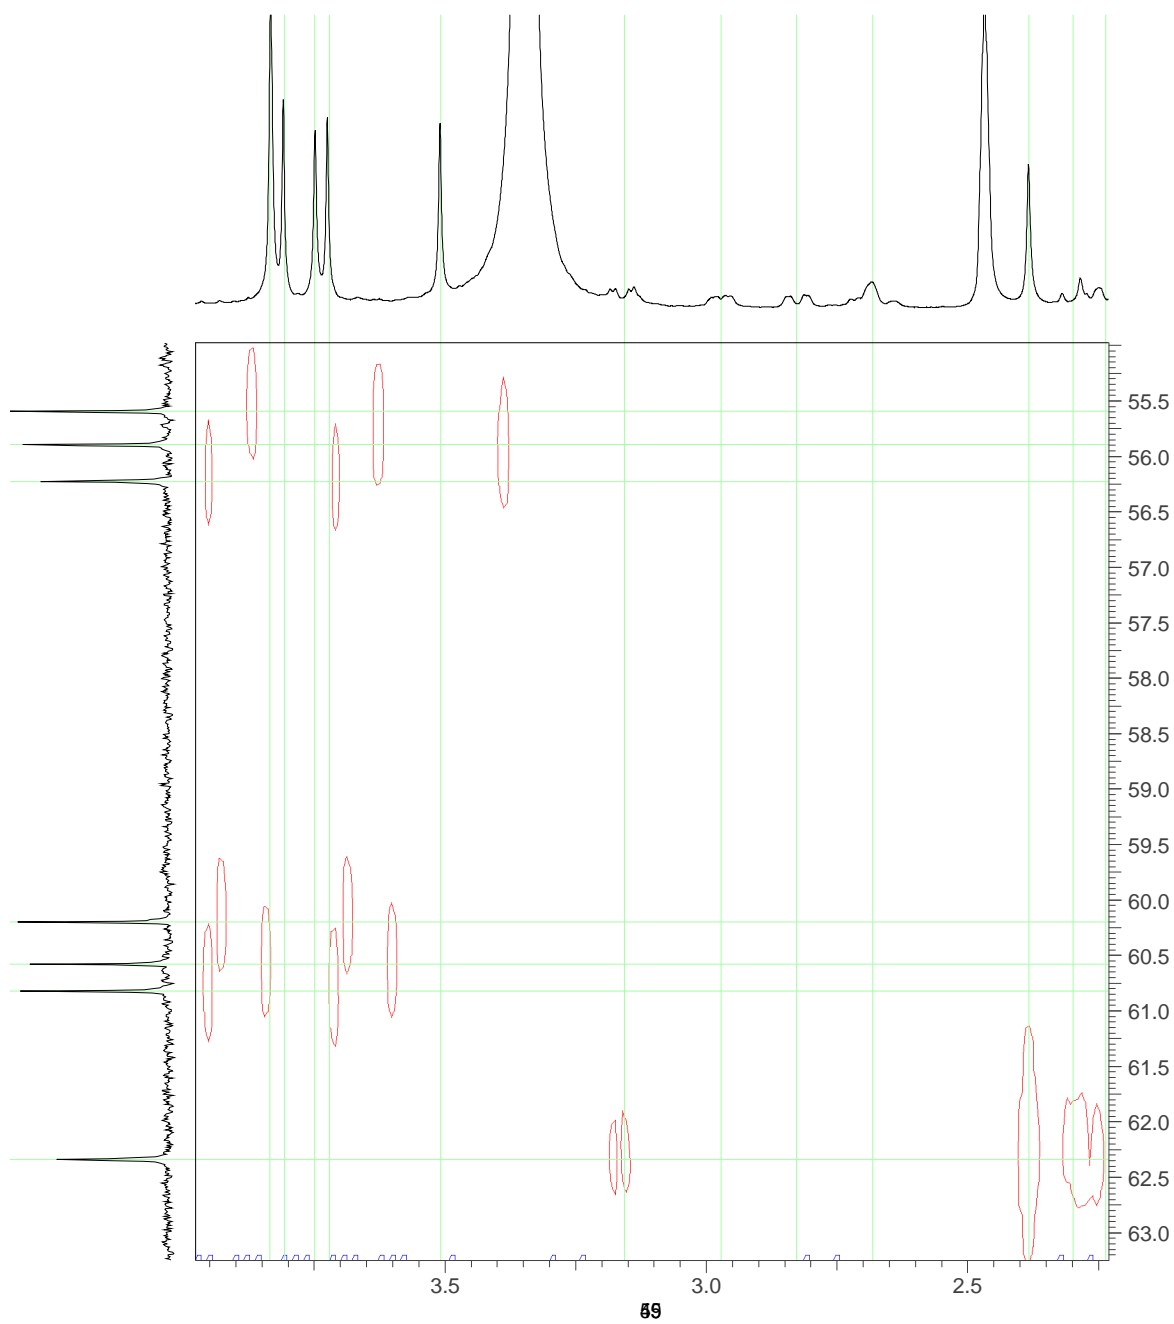

Figure S18.  $^1\text{H}$ - $^1\text{H}$  COSY spectrum of thalfoetine B (**2**) in  $\text{DMSO-}d_6$  (600 MHz)

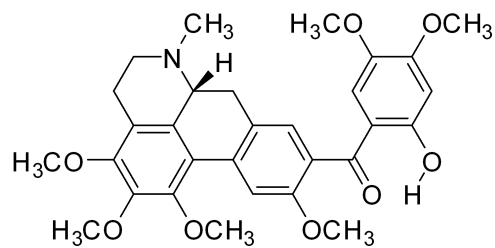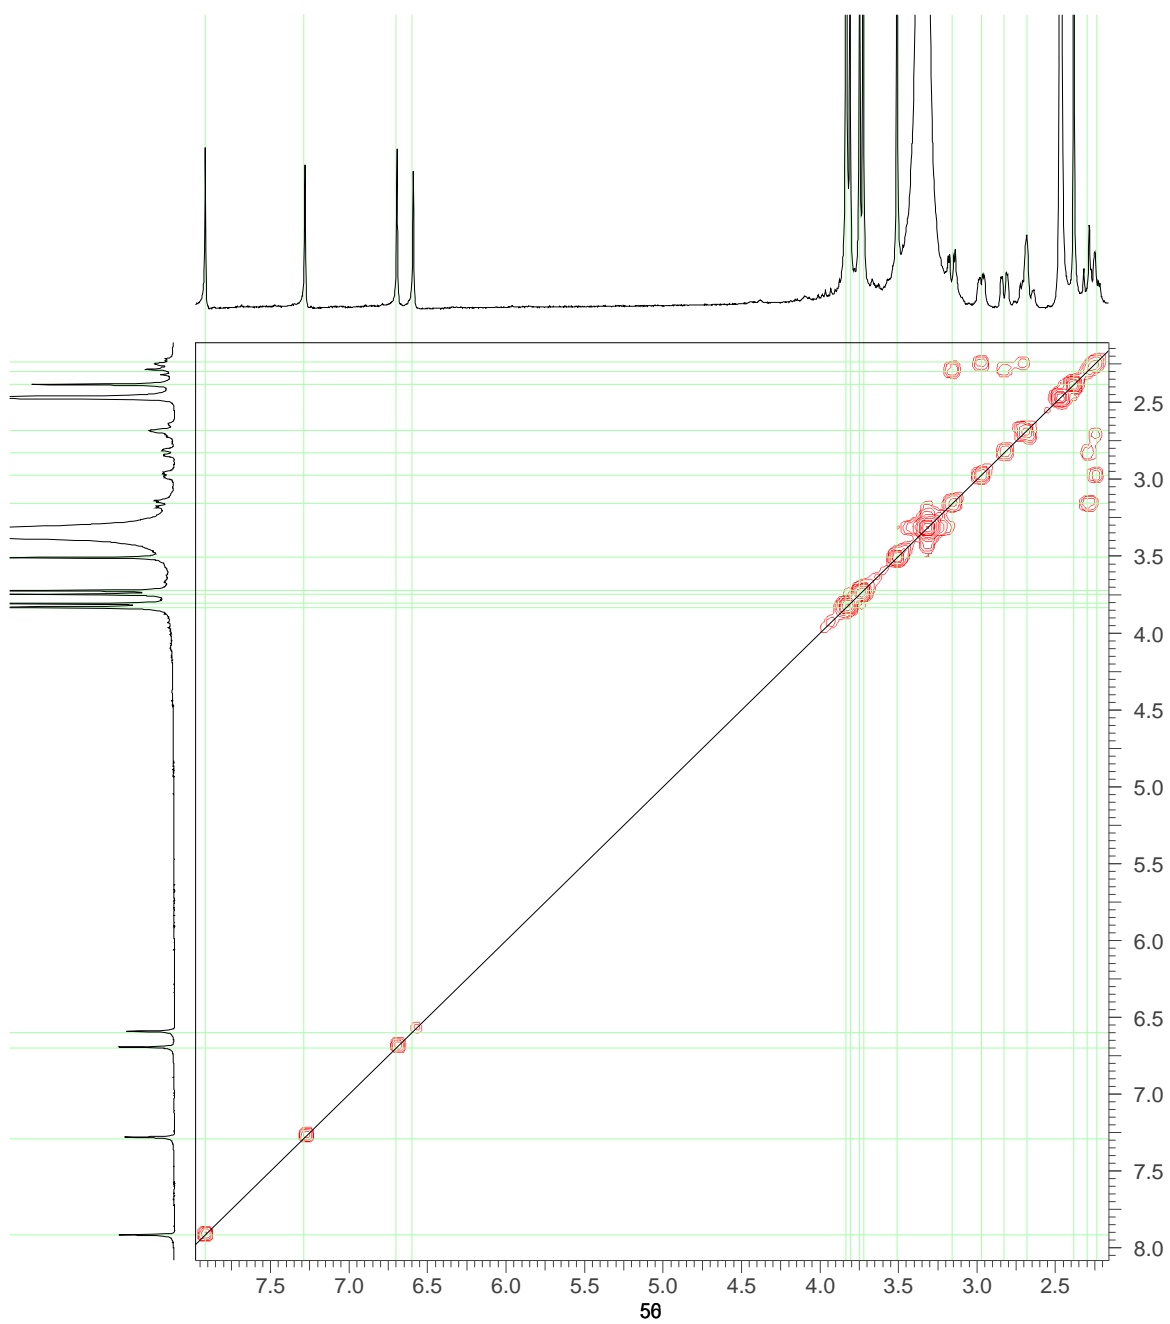



Figure S18-1. The partially enlarged  $^1\text{H}$ - $^1\text{H}$  COSY spectrum of thalfoetine B (2)

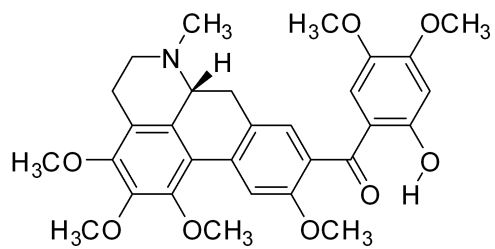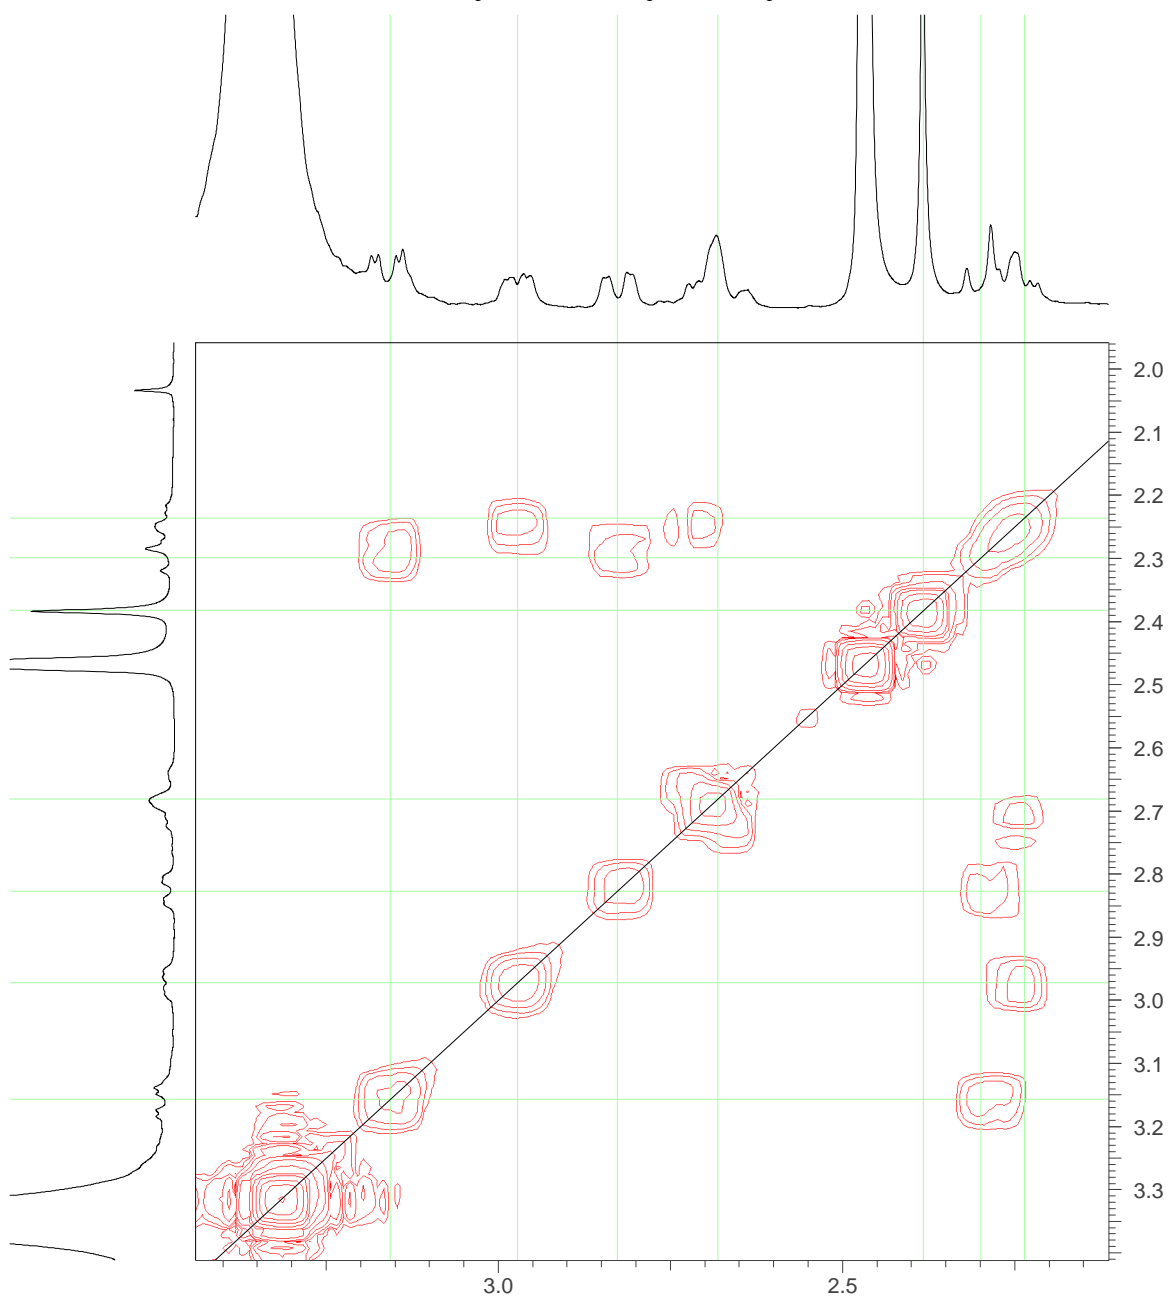

Figure S19. ROESY spectrum of voacafricine B (**2**) in DMSO-*d*<sub>6</sub> (600 MHz)

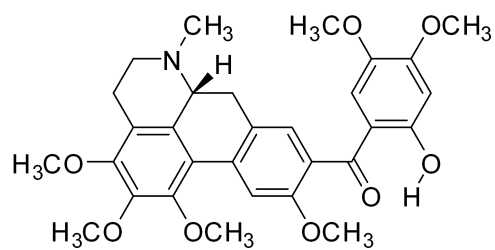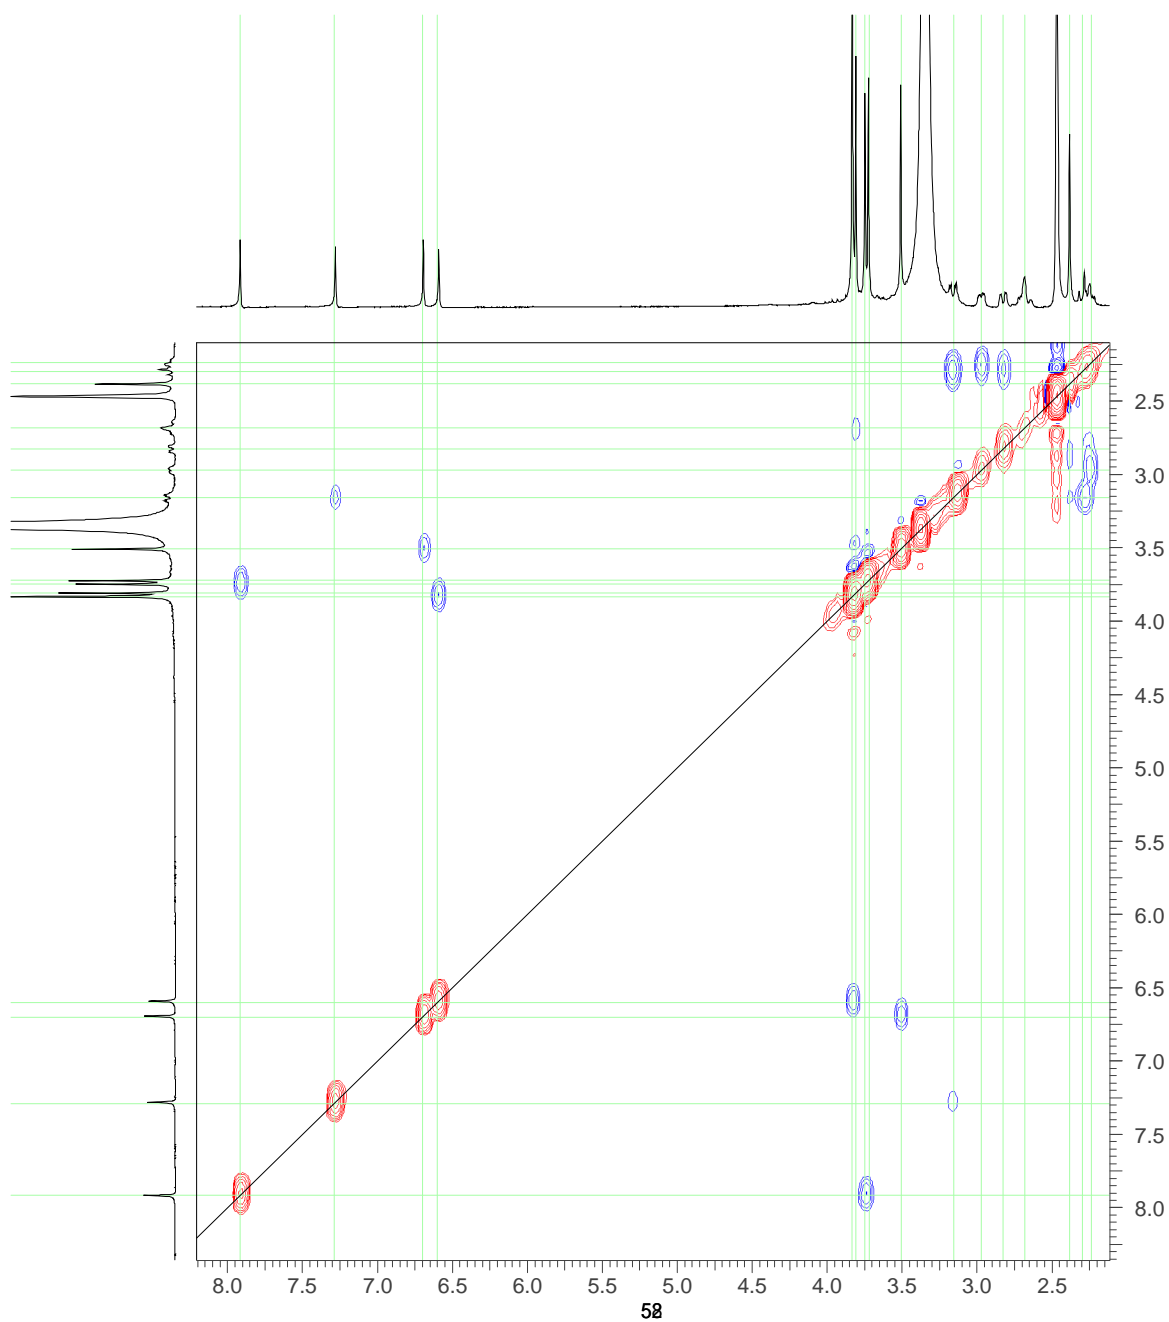

Figure S19-1. The partially enlarged ROESY spectrum of voacafricine B (2)

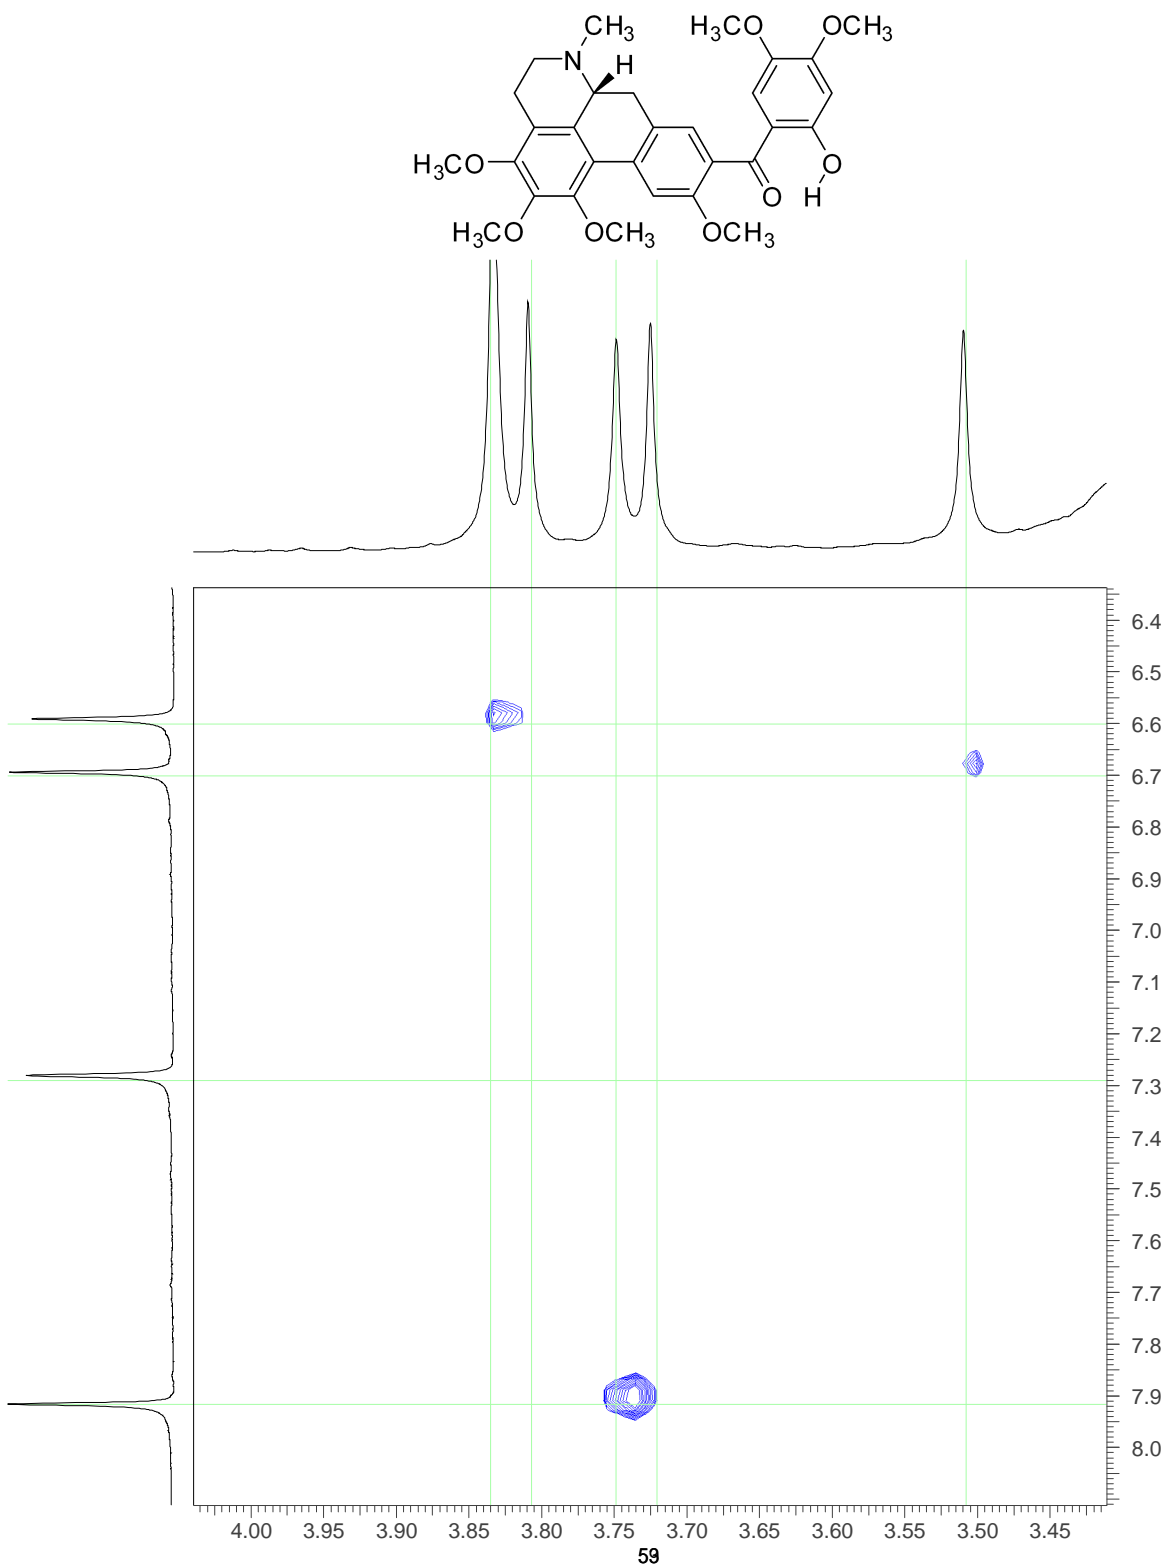

Figure S19-2. The partially enlarged ROESY spectrum of voacaficine B (2)

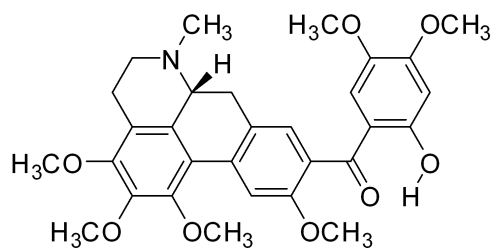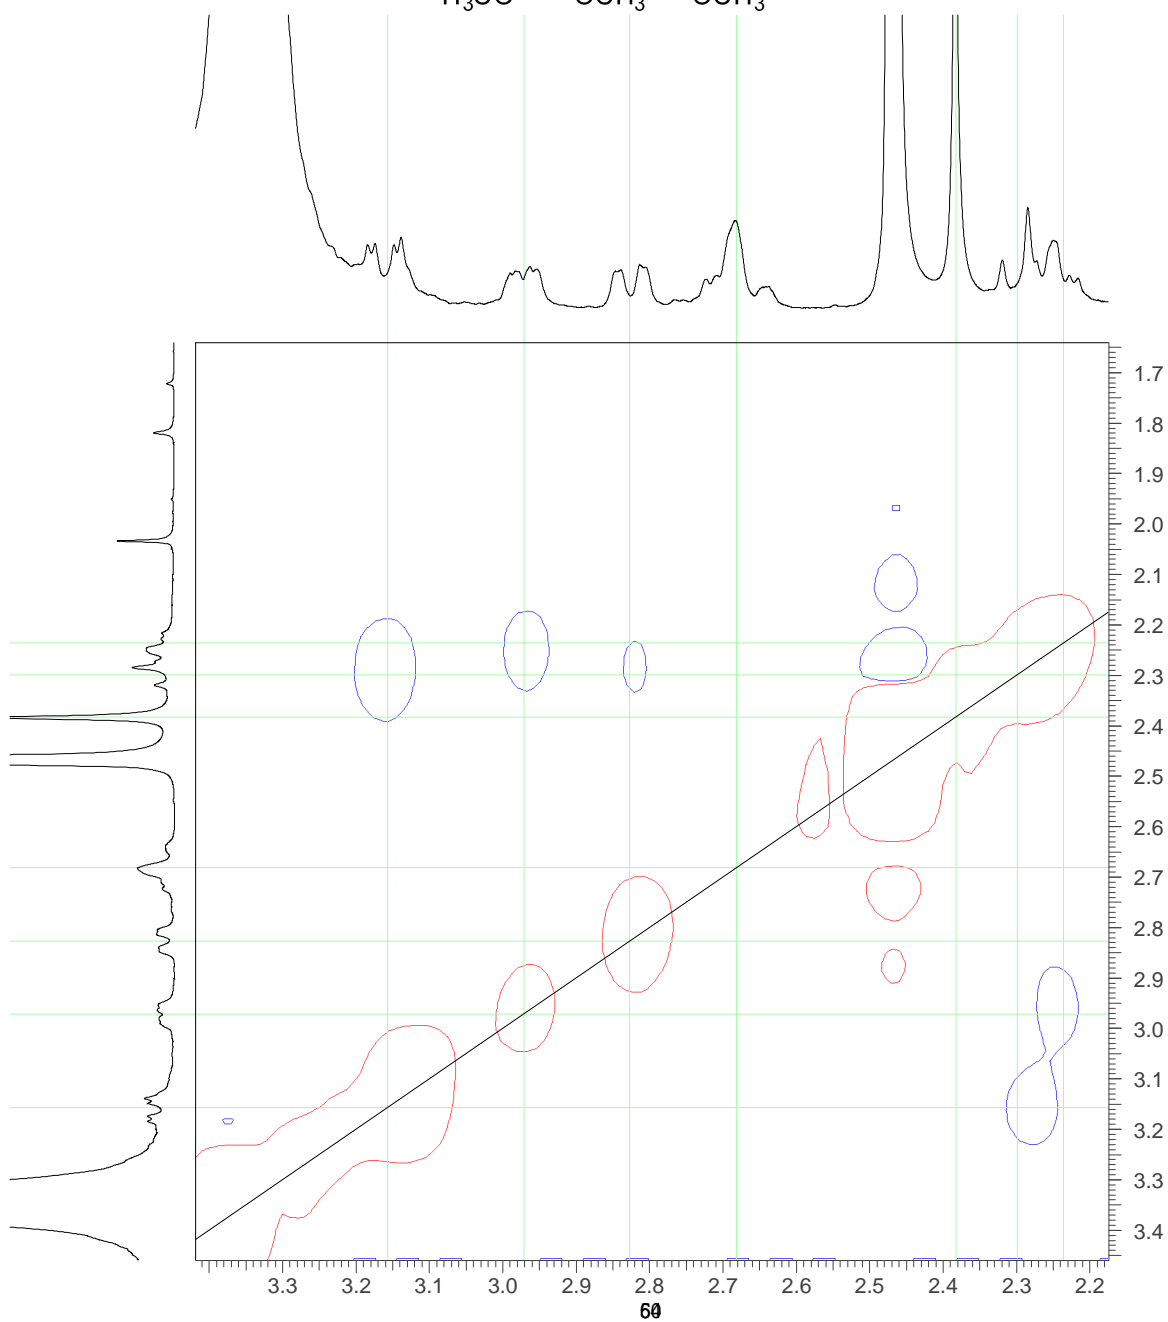

Data File: E:\DATA\2017\0531\wtflr-9.lcd

| Elmt | Val. | Min | Max | Use Adduct |
|------|------|-----|-----|------|------|-----|-----|------|------|-----|-----|------|------|-----|-----|------------|
| H    | 1    | 0   | 150 | O    | 2    | 0   | 50  | S    | 2    | 0   | 0   | Pt   | 2    | 0   | 0   | Na         |
| B    | 3    | 0   | 0   | F    | 1    | 0   | 0   | Cl   | 1    | 0   | 0   |      |      |     |     |            |
| C    | 4    | 0   | 100 | Na   | 1    | 0   | 0   | Br   | 1    | 0   | 0   |      |      |     |     |            |
| N    | 3    | 0   | 15  | Si   | 4    | 0   | 0   | I    | 3    | 0   | 0   |      |      |     |     |            |

Error Margin (ppm): 10  
 HC Ratio: unlimited  
 Max Isotopes: all  
 MSn Iso RI (%): 75.00

DBE Range: -2.0 - 100.0  
 Apply N Rule: yes  
 Isotope RI (%): 1.00  
 MSn Logic Mode: AND

Electron Ions: both  
 Use MSn Info: yes  
 Isotope Res: 10000  
 Max Results: 100

Event#: 1 MS(E+) Ret. Time : 0.420 -> 0.460 Scan# : 85 -> 93

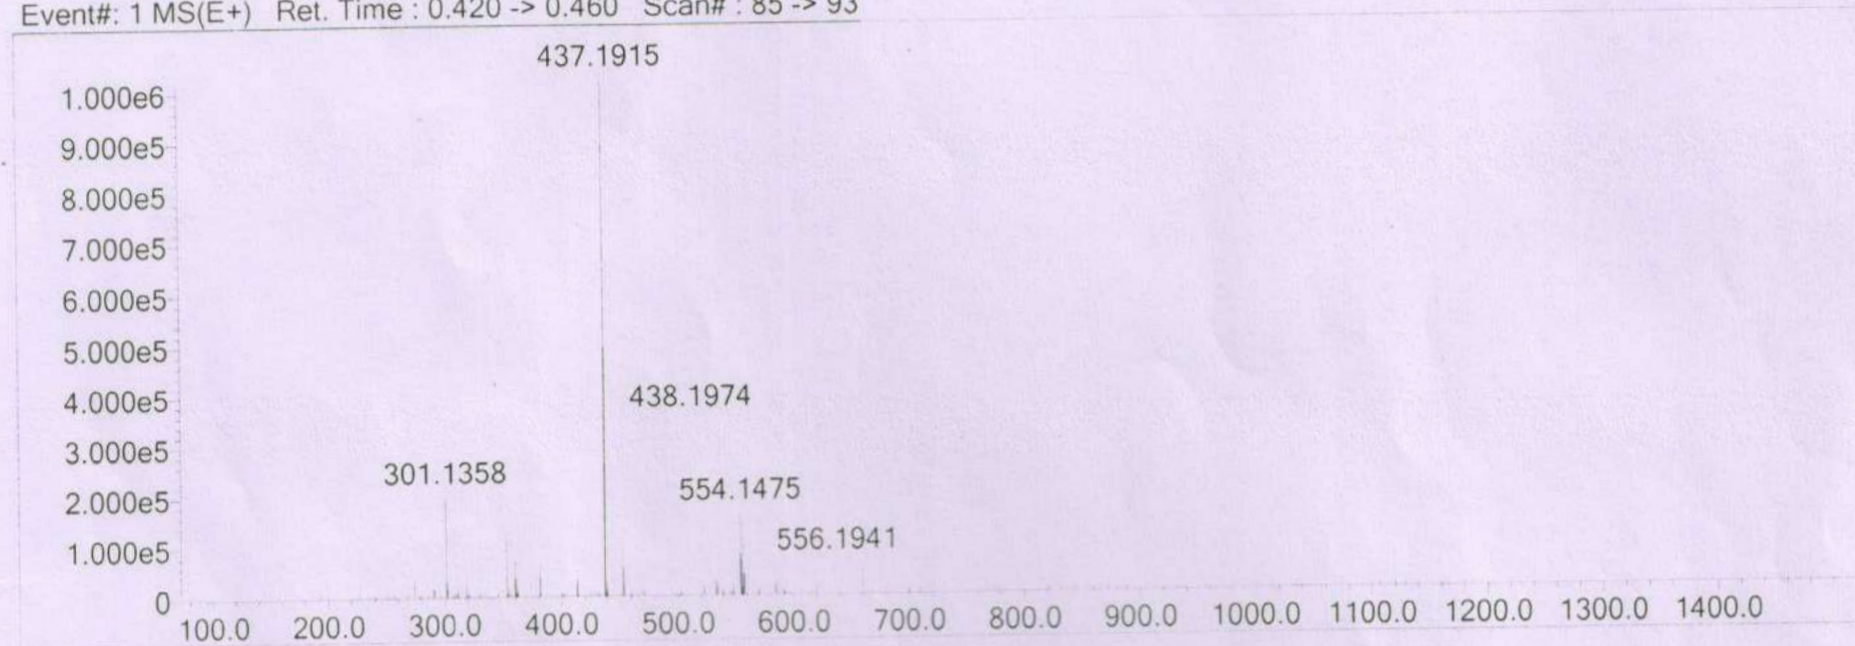

Measured region for 556.1941 m/z

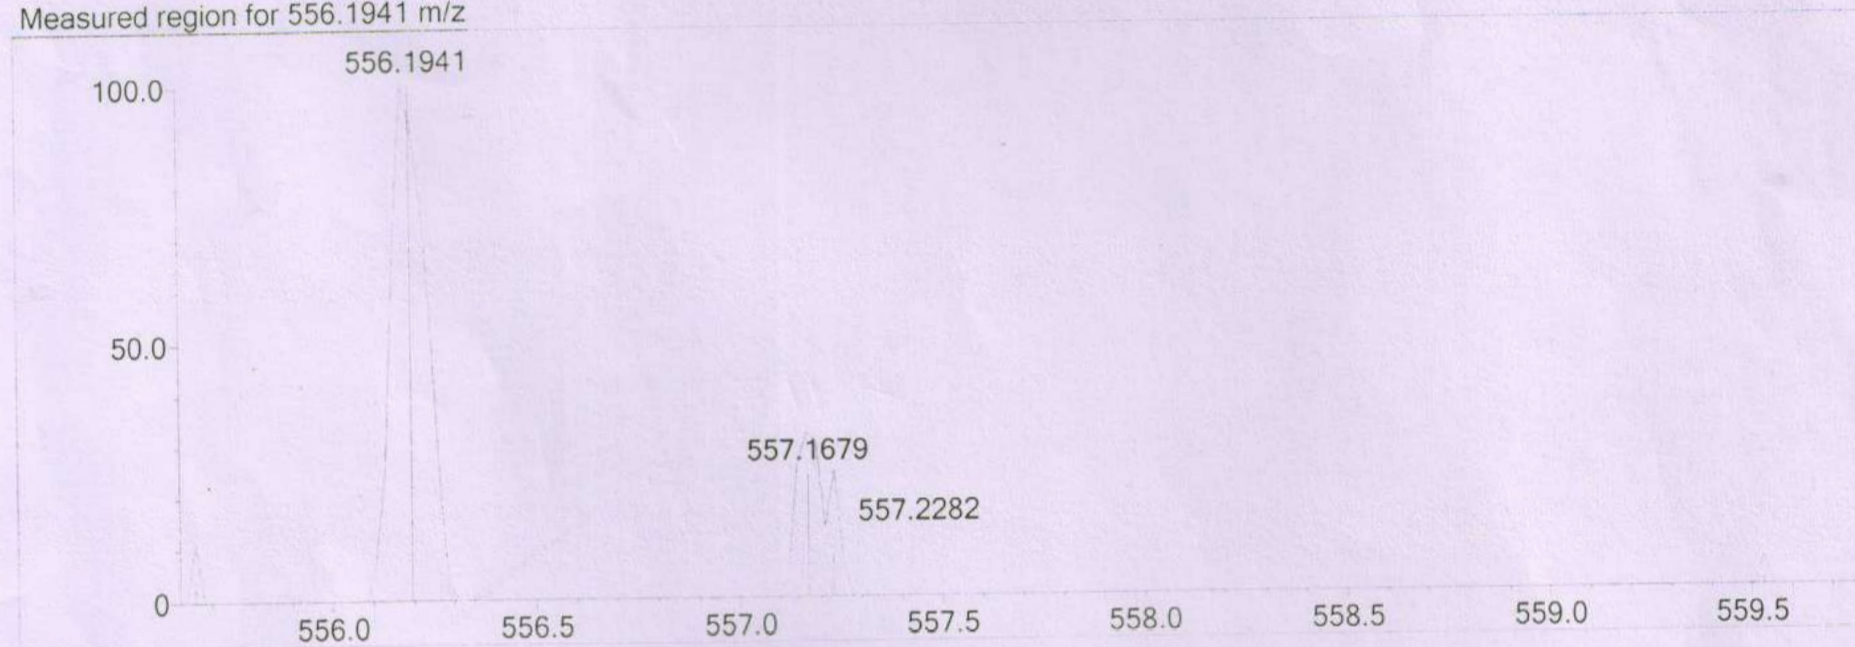

C30 H31 N O8 [M+Na]+ : Predicted region for 556.1942 m/z

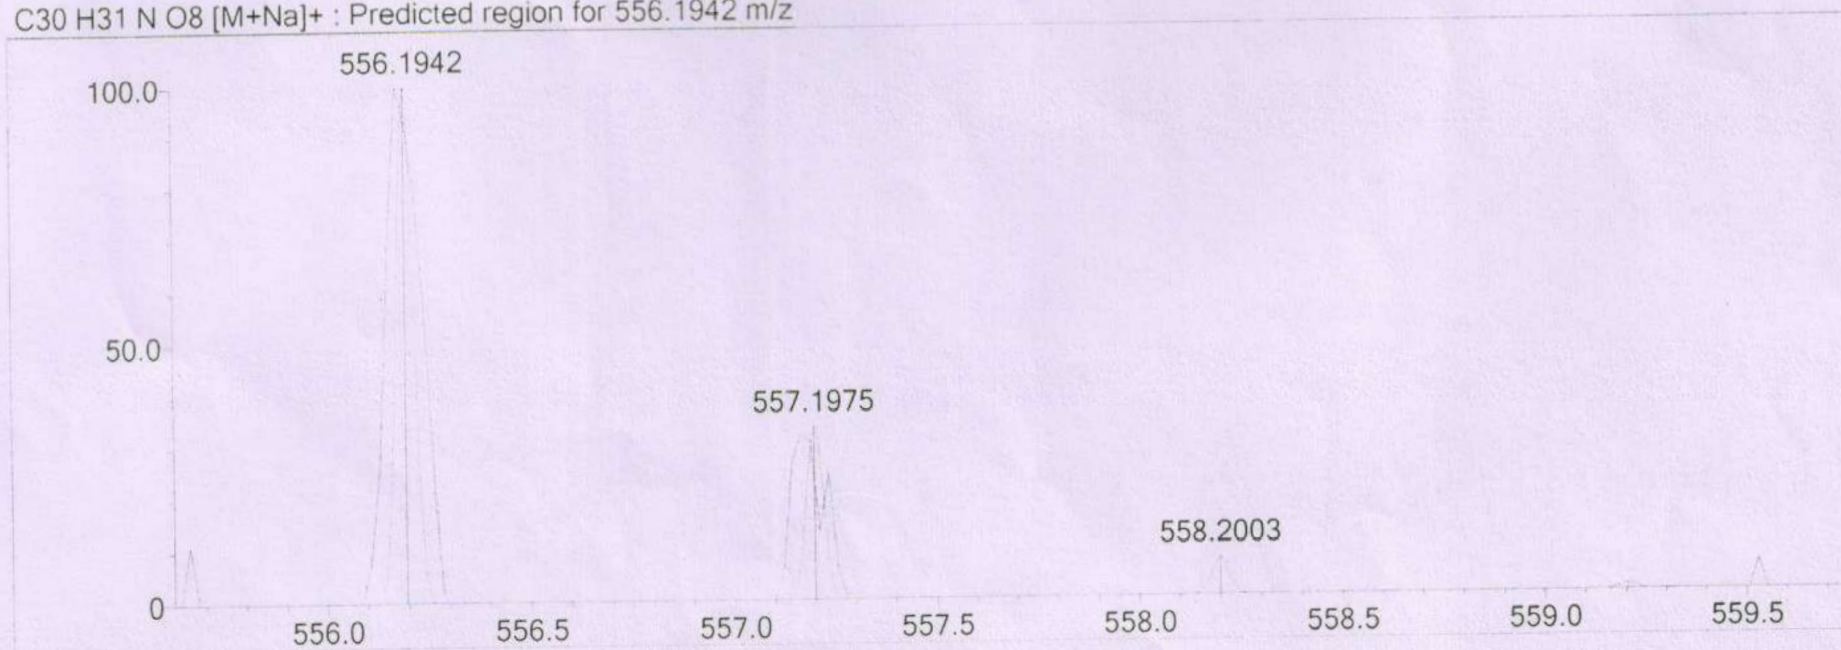

| Formula (M)  | Ion                 | Meas. m/z | Pred. m/z | Df. (mDa) | Df. (ppm) | DBE  |
|--------------|---------------------|-----------|-----------|-----------|-----------|------|
| C30 H31 N O8 | [M+Na] <sup>+</sup> | 556.1941  | 556.1942  | -0.1      | -0.18     | 16.0 |

Figure S21. IR spectrum of thalfoetine C (3)

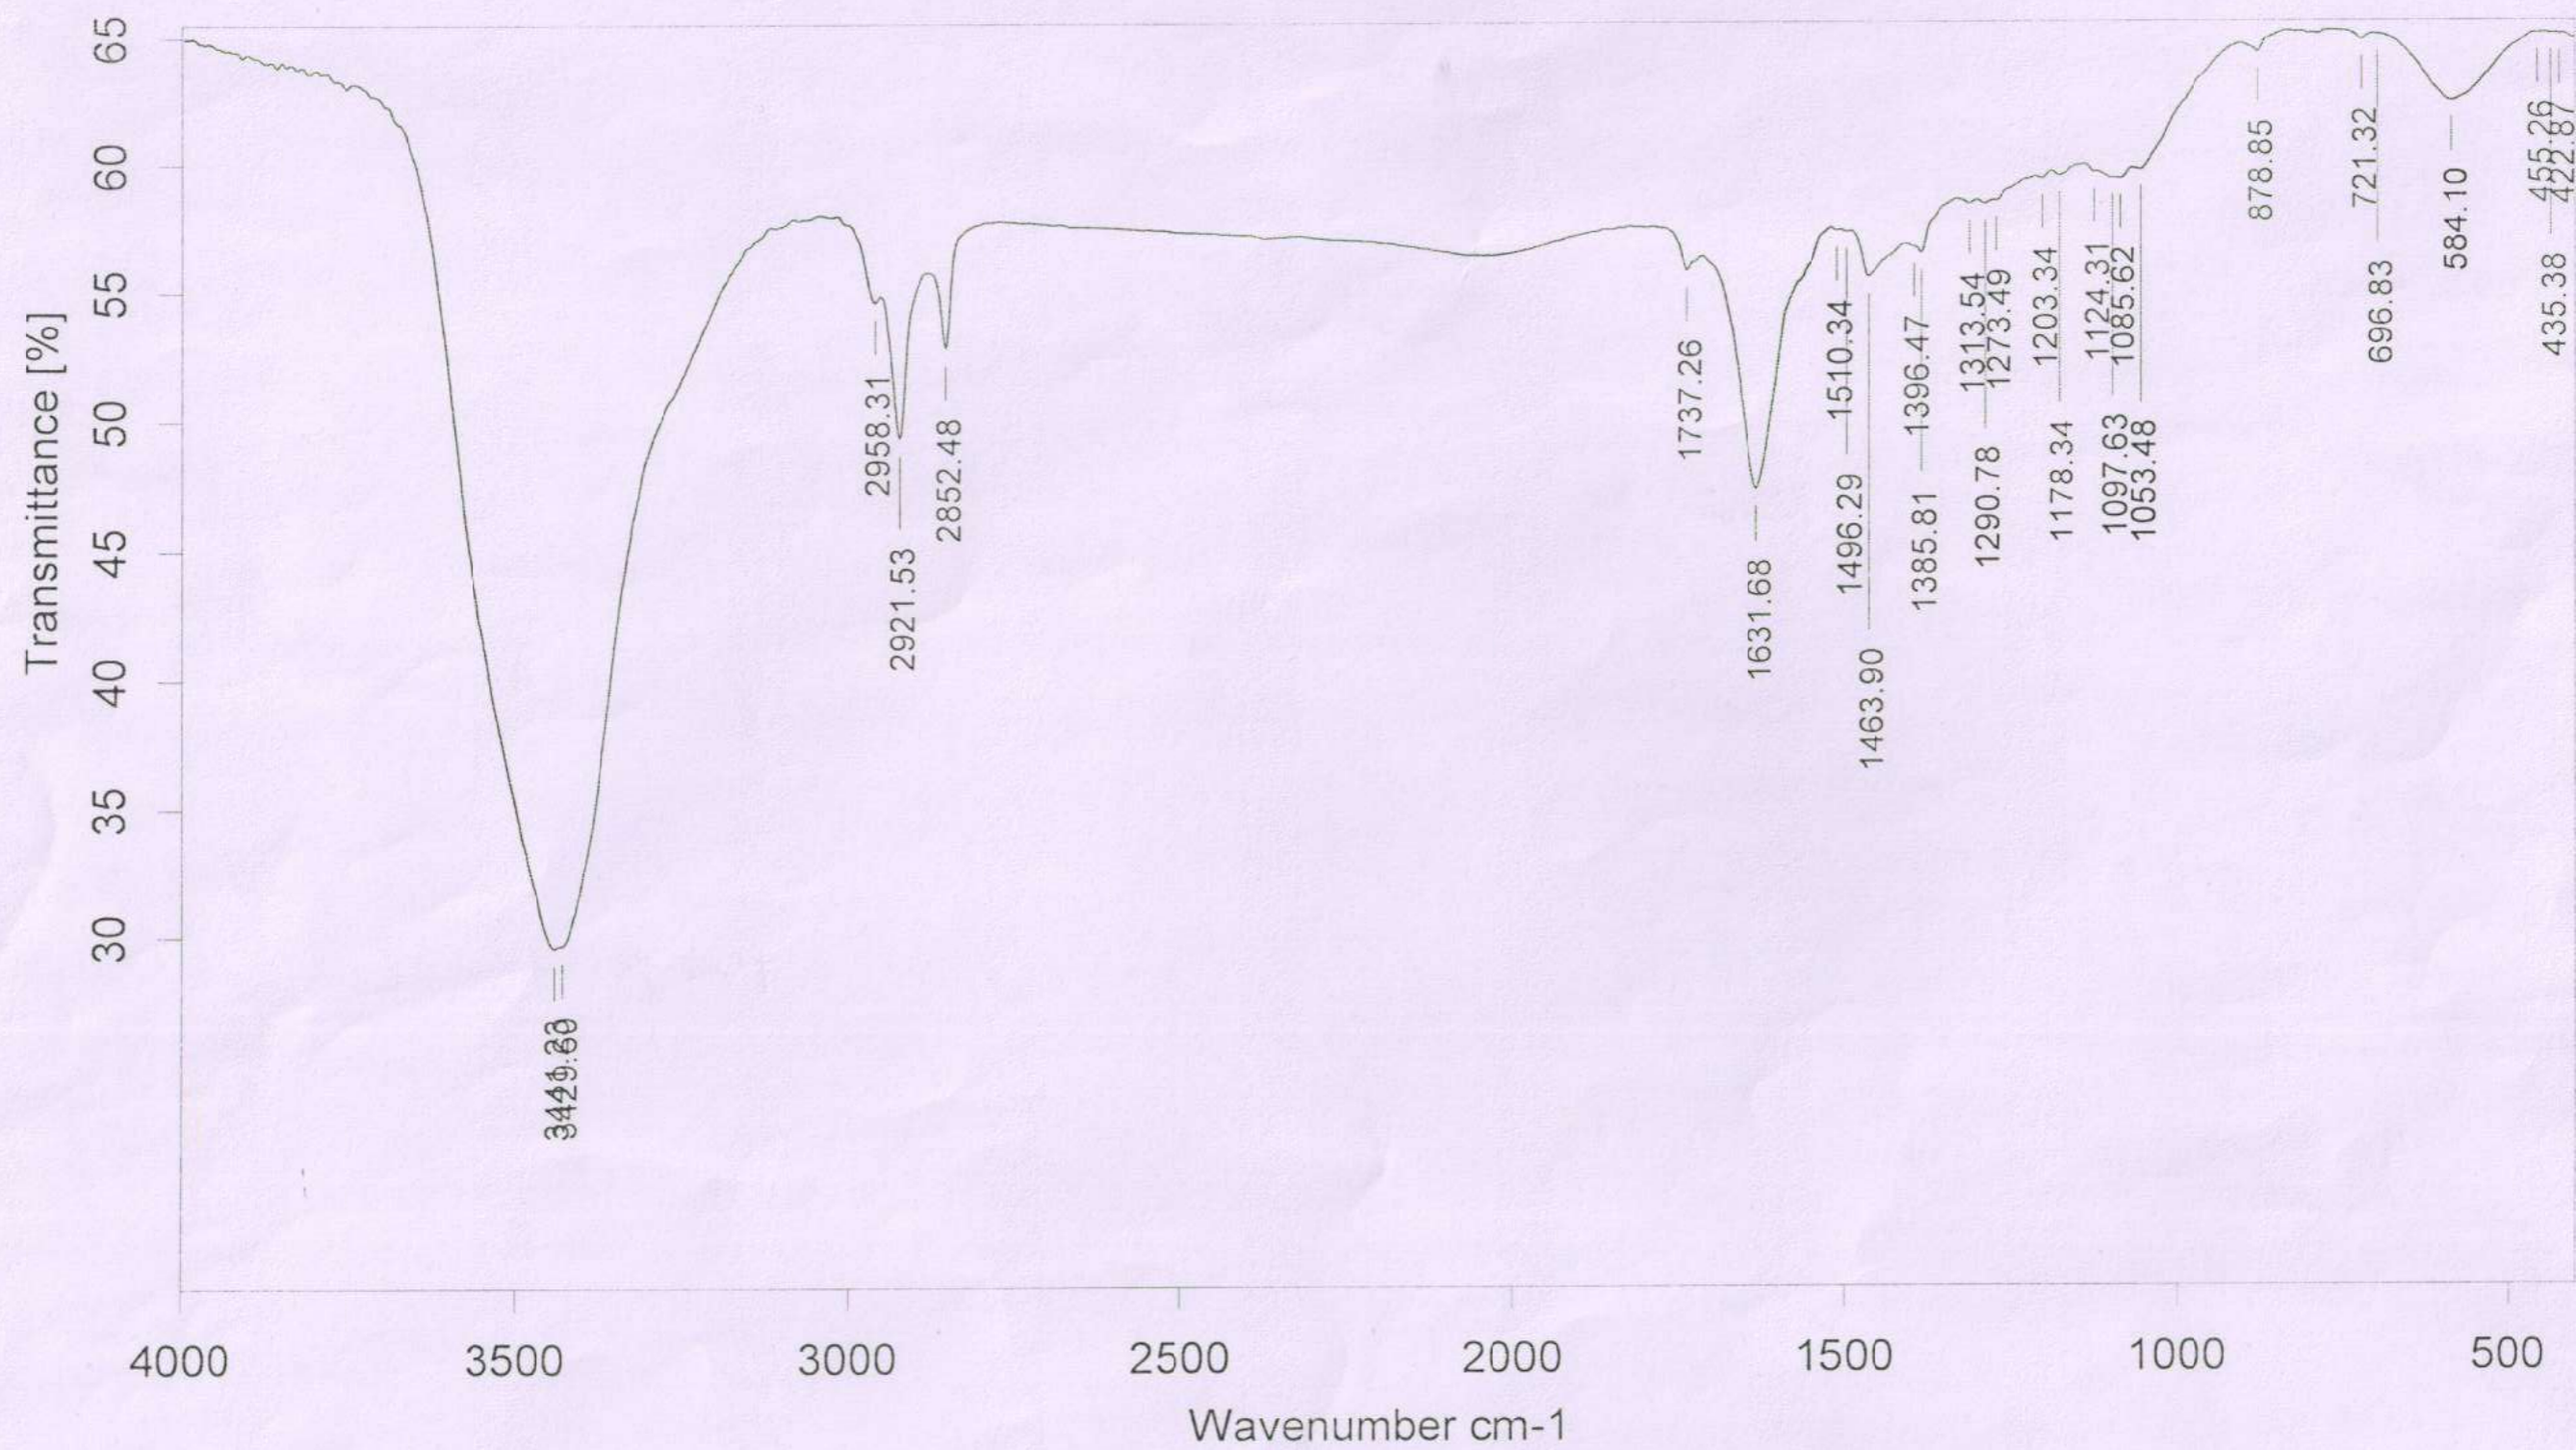

|                      |                                     |                                |
|----------------------|-------------------------------------|--------------------------------|
| Sample : wtflr-9     | Frequency Range : 399.246 - 3996.32 | Measured on : 04/09/2017       |
| Technique : KBr压片    | Resolution : 4                      | Instrument : Tensor27          |
| Customer : 170904IR2 | Zerofilling : 2                     | Sample Scans : 16              |
|                      |                                     | Acquisition : Double Sided,For |

Figure S22. UV spectrum of thalfoetine C (3)

SHIMADZU UV-2401PC

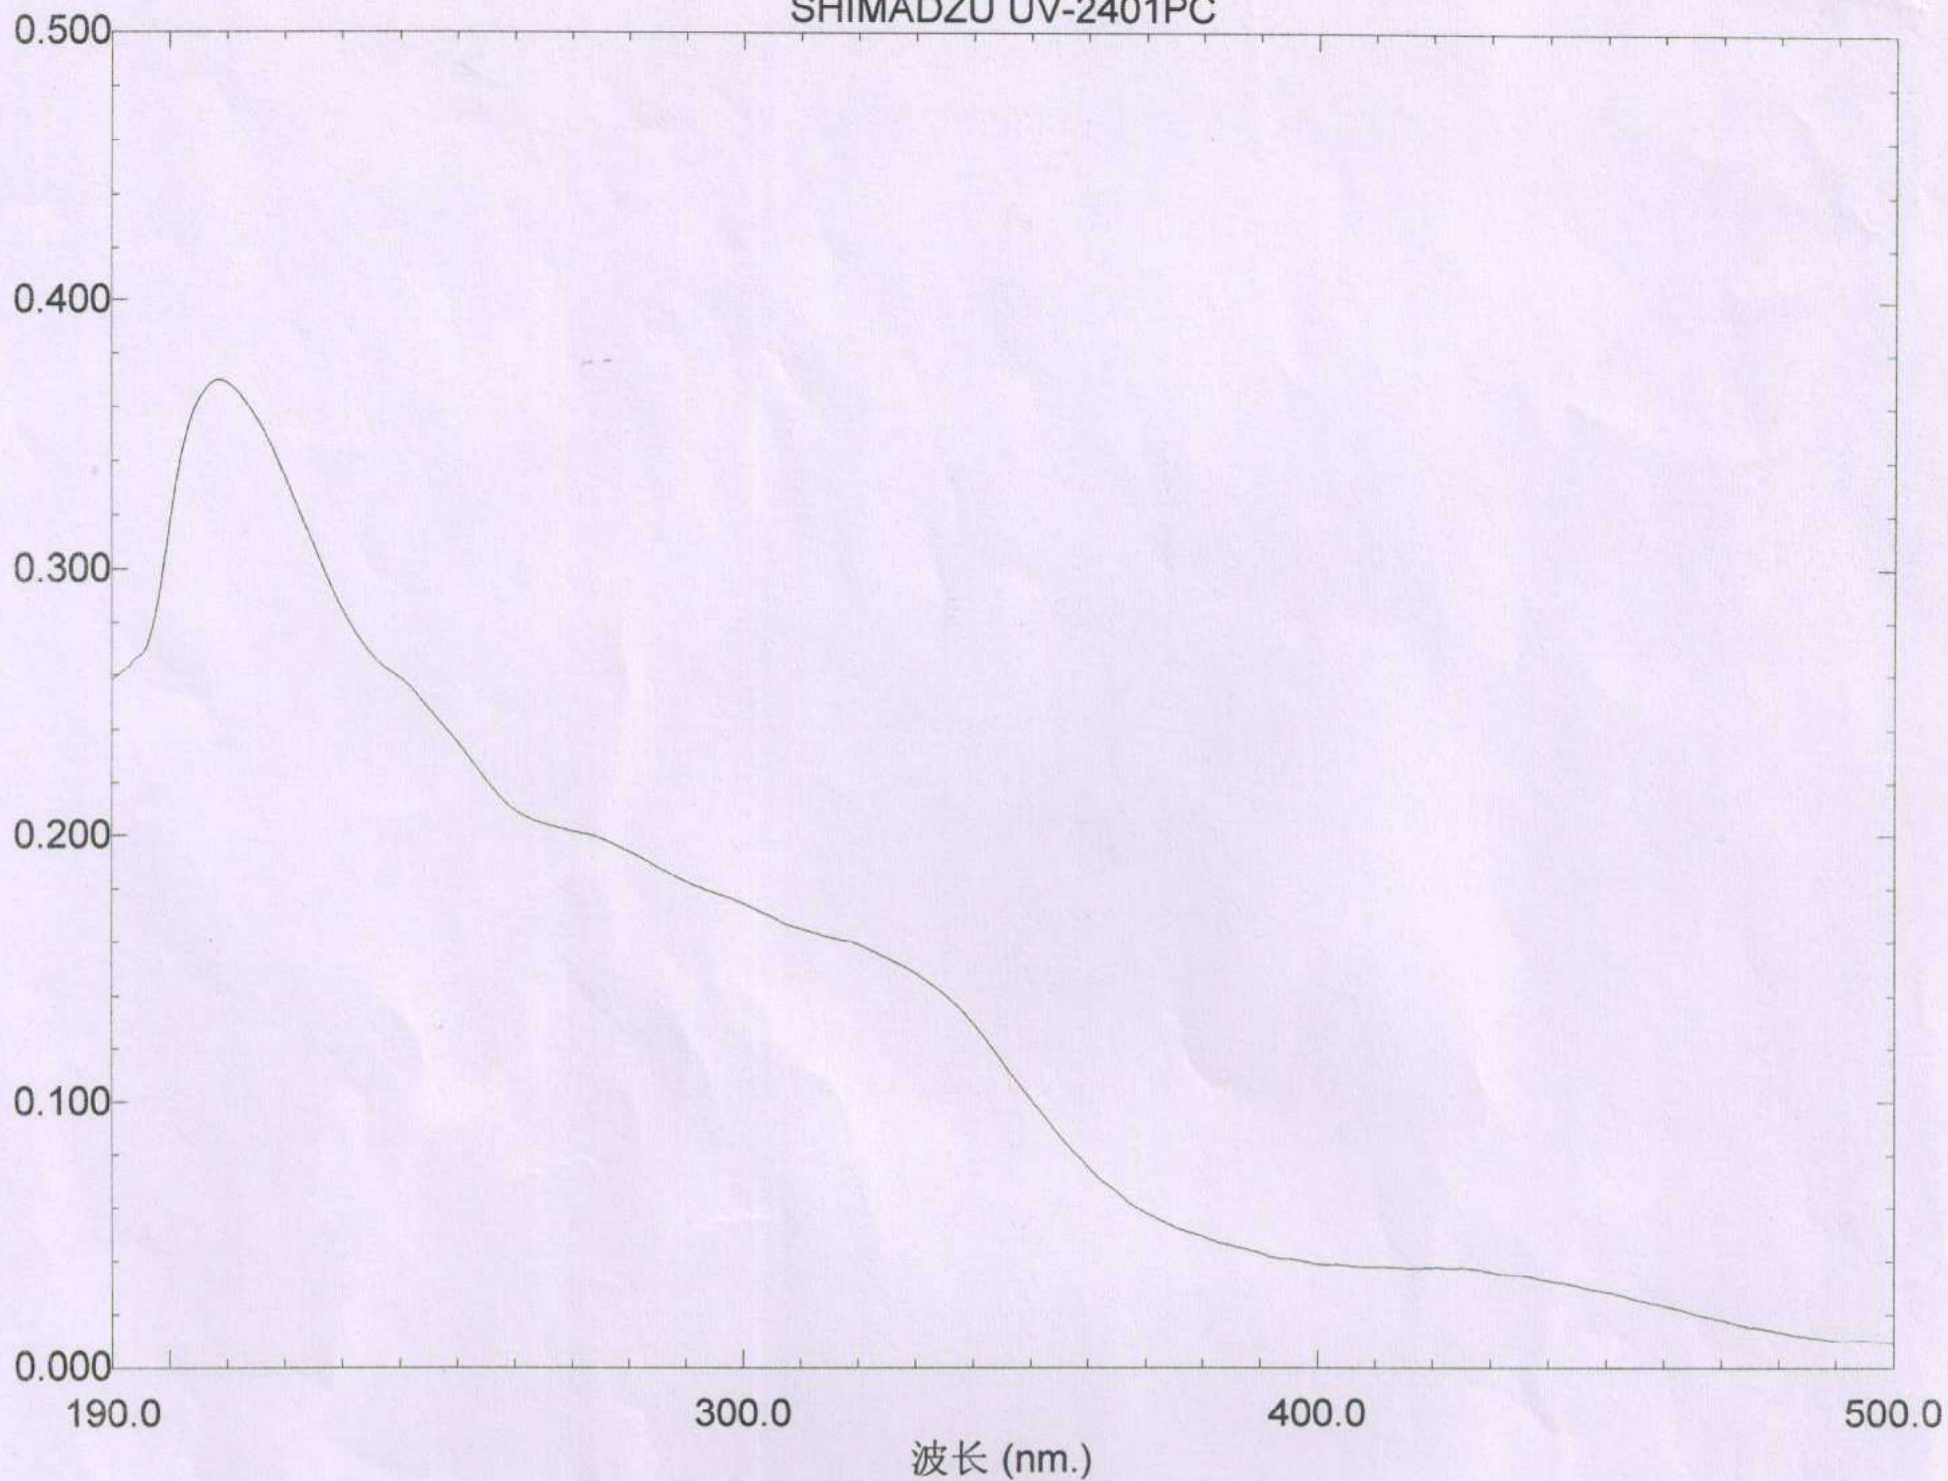

文件名: WTFLR-9

WTFLR-9

创建于: 18:09 17-09-05

样品浓度: 0.0239毫克/毫升

数据: 原始

溶剂: 甲醇

测量模式: Abs.  
扫描速度: 中速  
狭缝: 5.0  
采样间隔: 0.5

| 否. | 波长 (nm.) | Abs.   |
|----|----------|--------|
| 1  | 208.50   | 0.3698 |
| 2  | 238.00   | 0.2618 |
| 3  | 265.50   | 0.2039 |
| 4  | 315.50   | 0.1615 |
| 5  | 416.00   | 0.0369 |

Figure S23.  $^1\text{H}$  NMR spectrum of thalfoetine C (**3**) in  $\text{CDCl}_3$  (600 MHz)

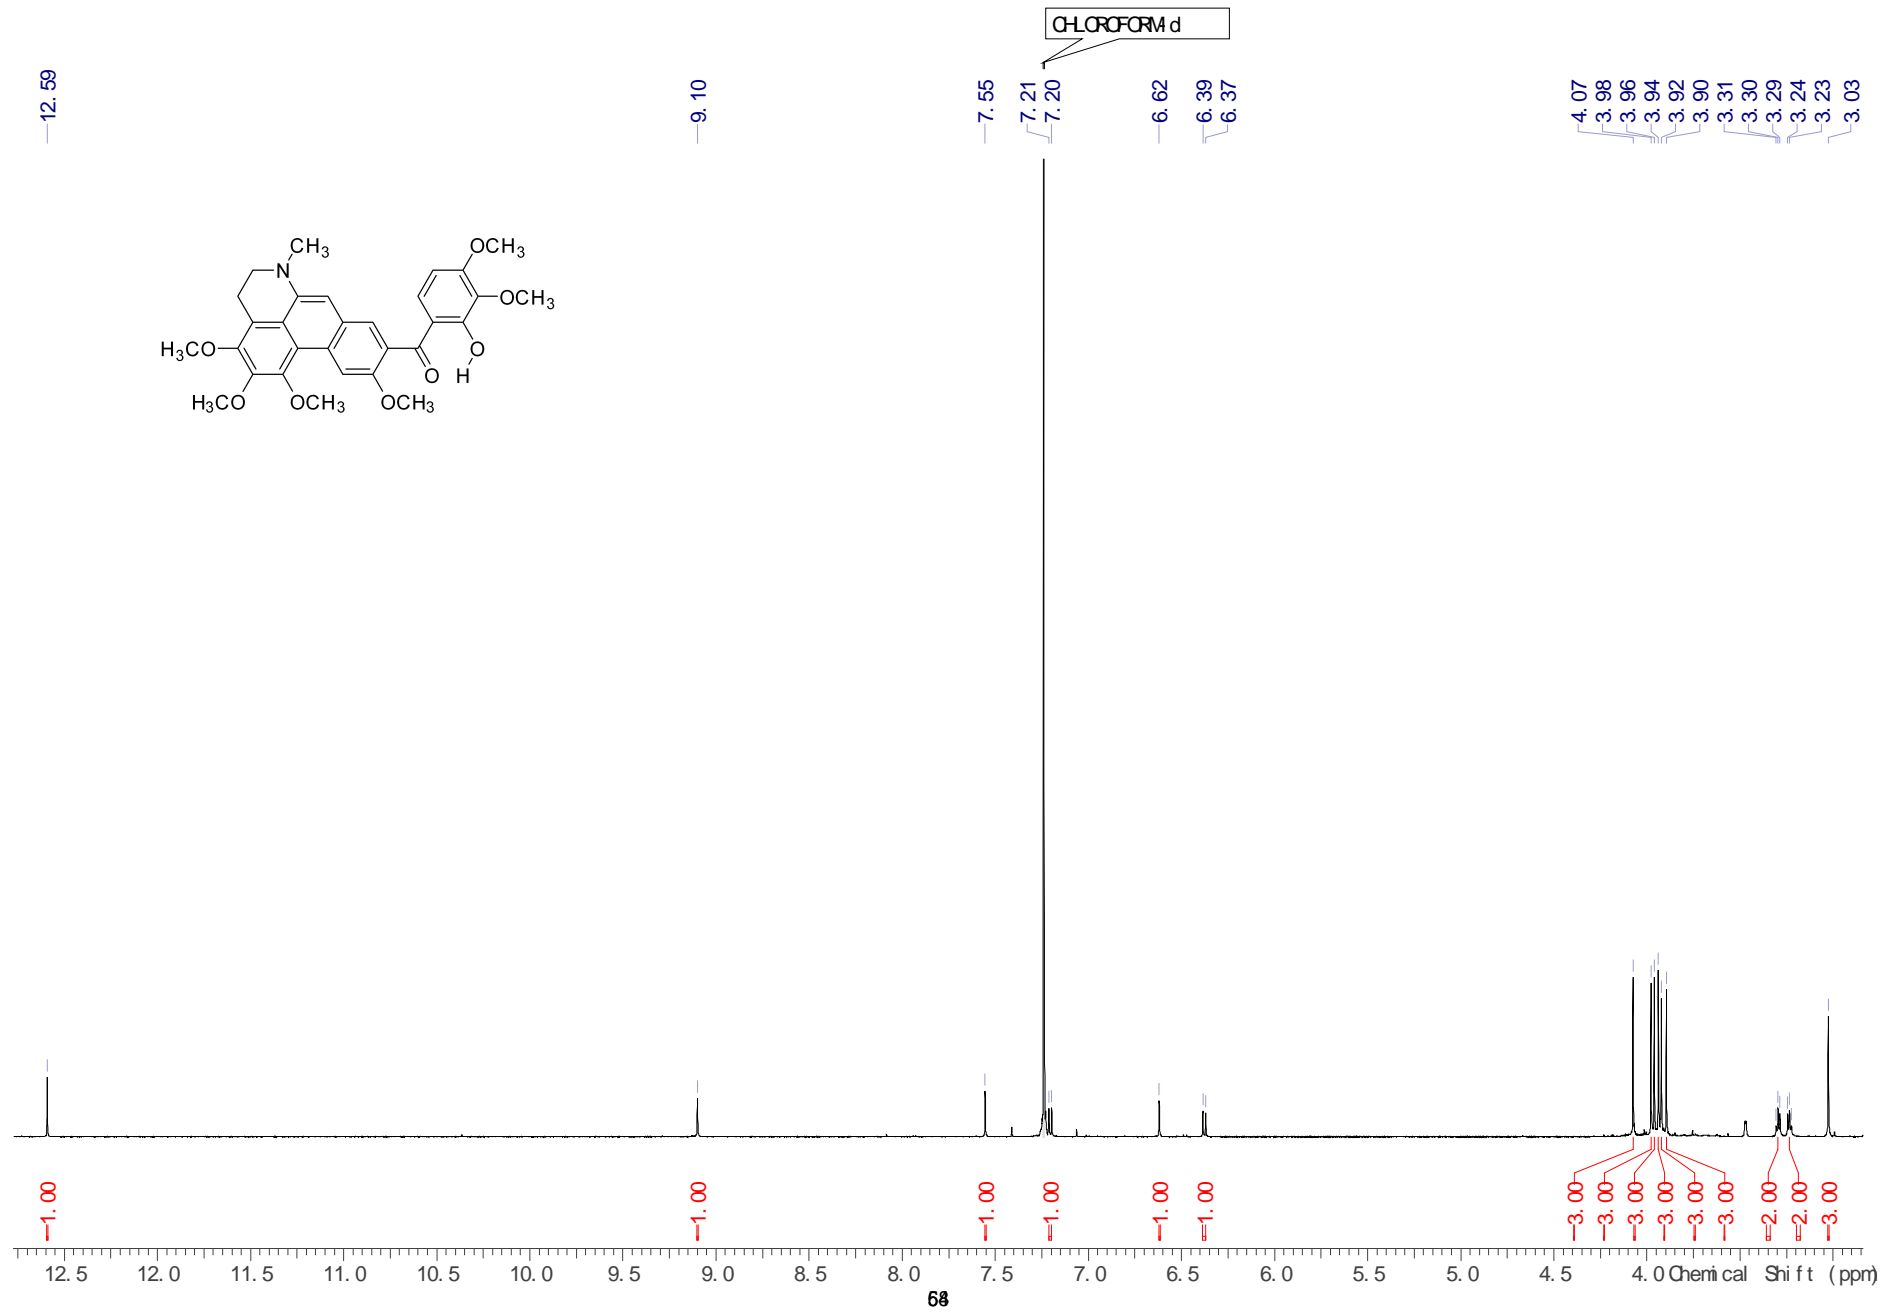



Figure S24.  $^{13}\text{C}$  NMR spectrum of thalfoetine C (**3**) in  $\text{CDCl}_3$  (150 MHz)

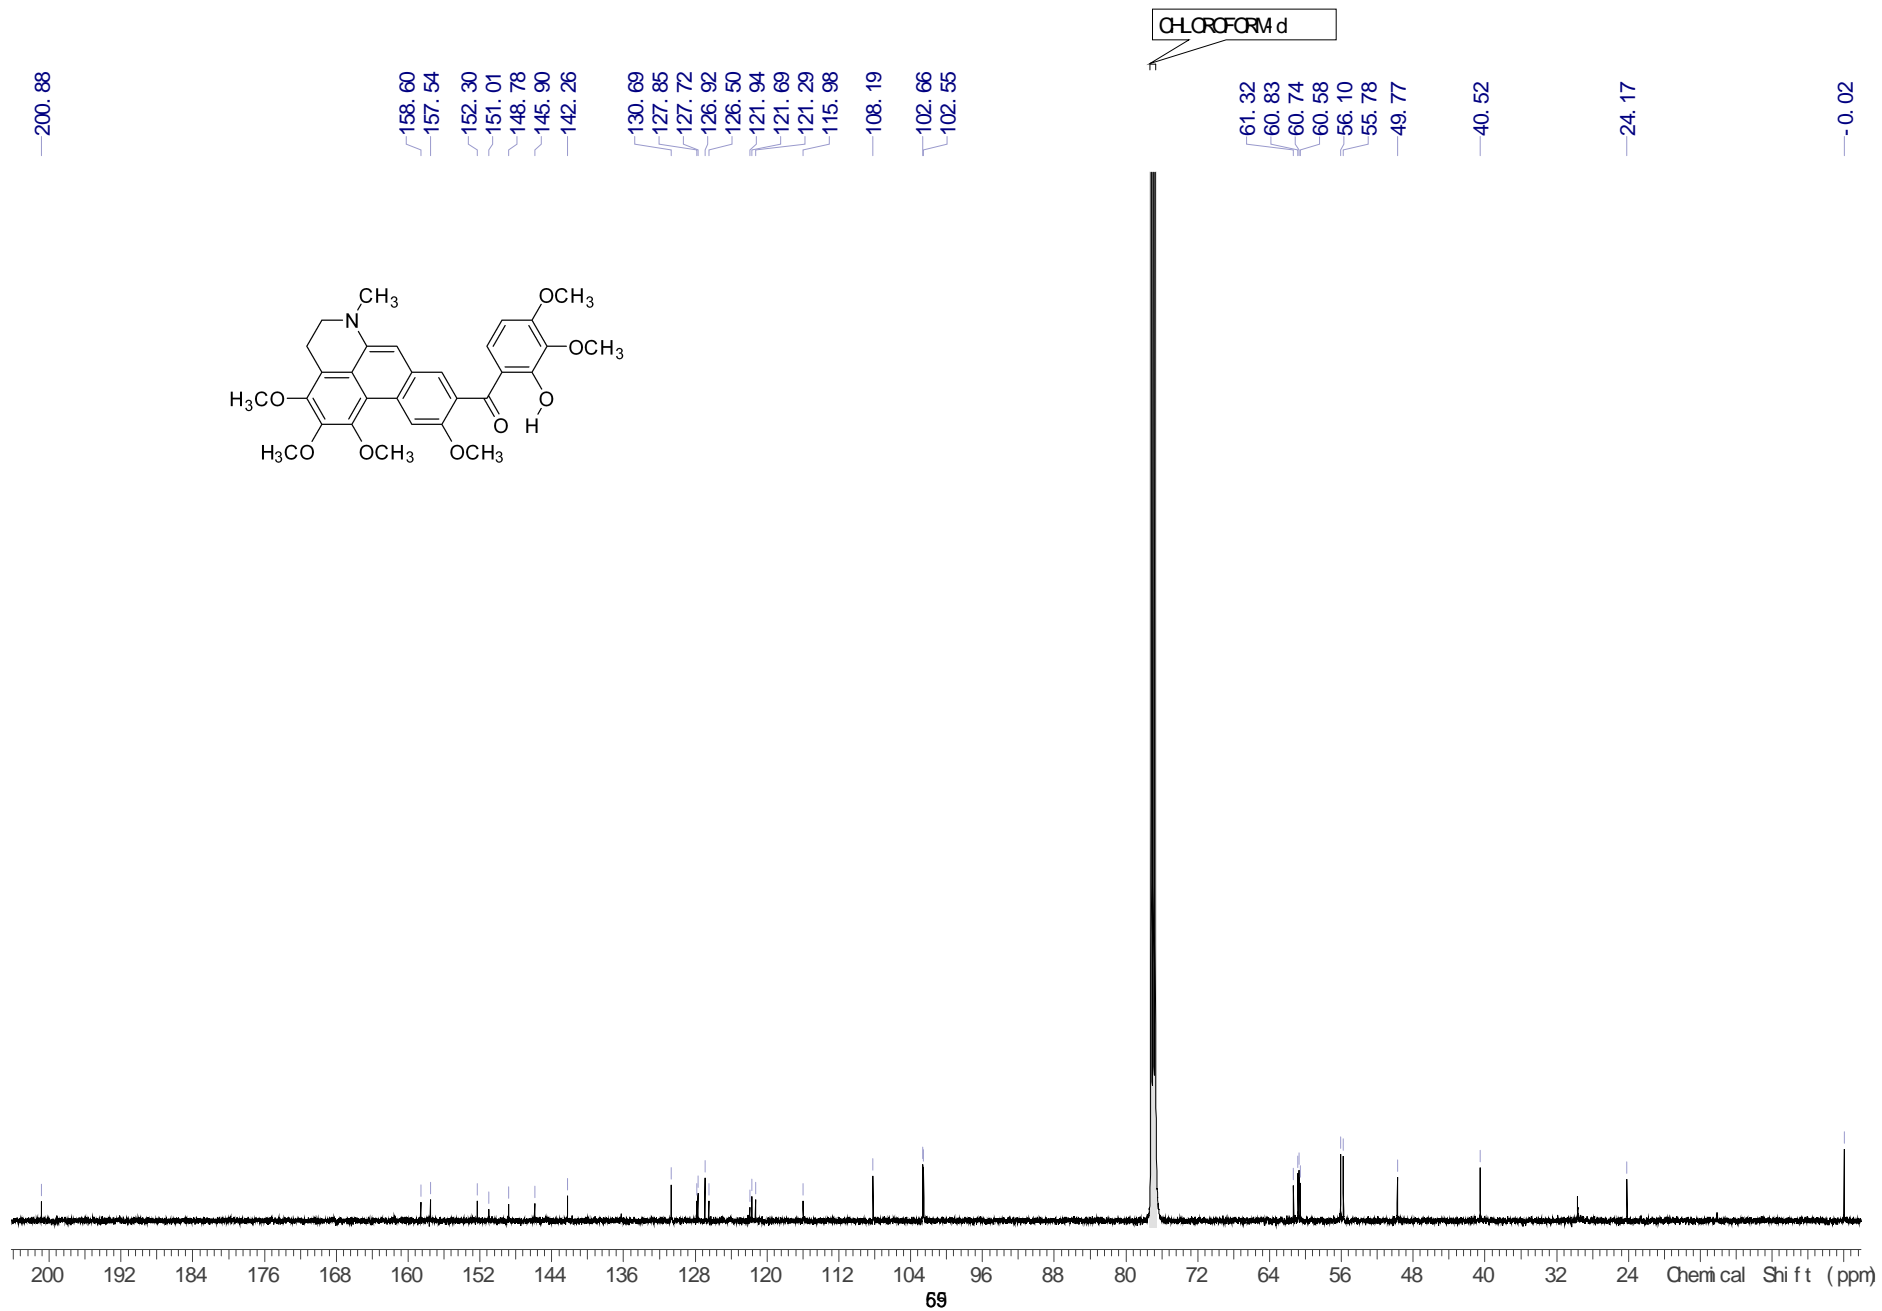

Figure S24-1. DEPT 90 spectrum of thalfoetine C (**3**) in CDCl<sub>3</sub> (150 MHz)

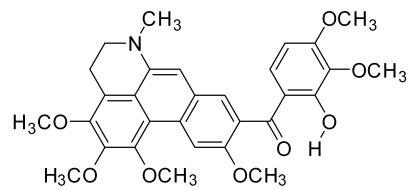

130.69  
126.92  
108.19  
102.66  
102.55

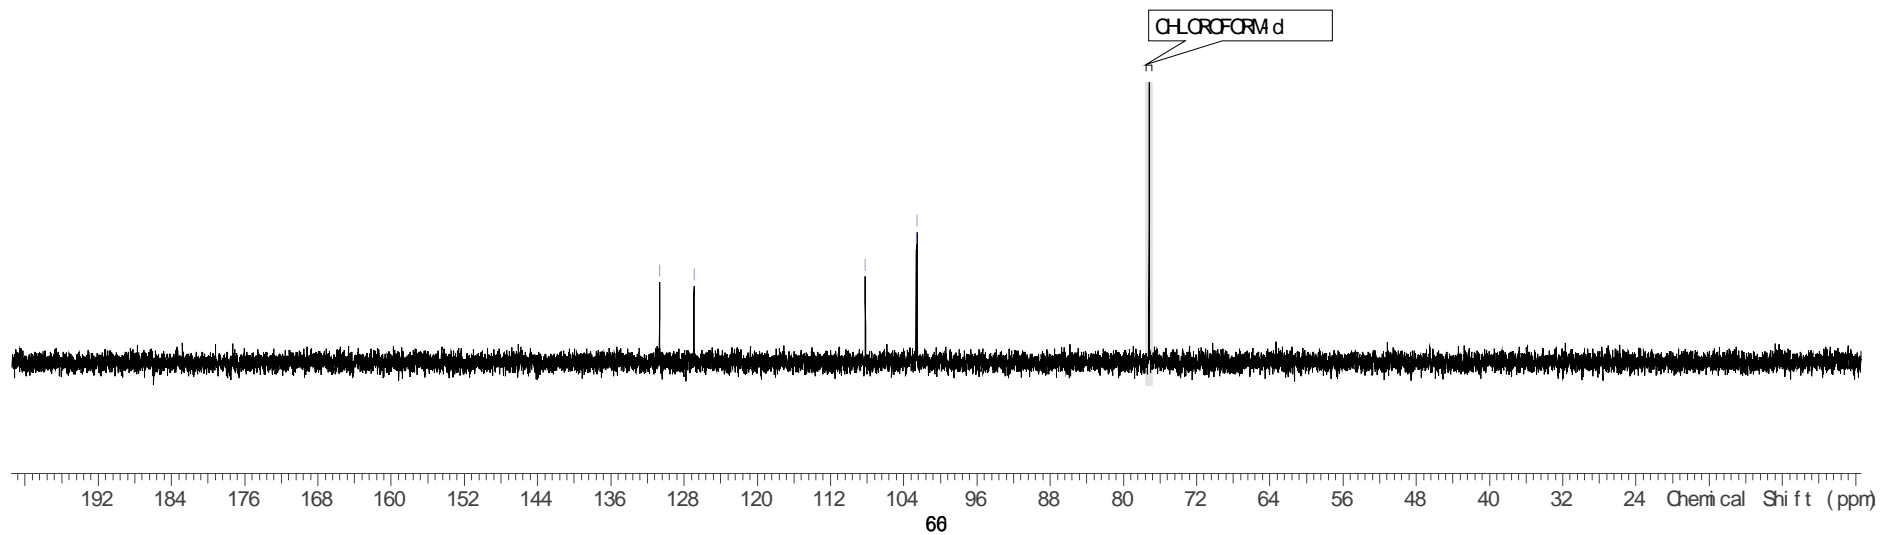

Figure S24-2. DEPT 135 spectrum of thalfoetine C (**3**) in CDCl<sub>3</sub> (150 MHz)

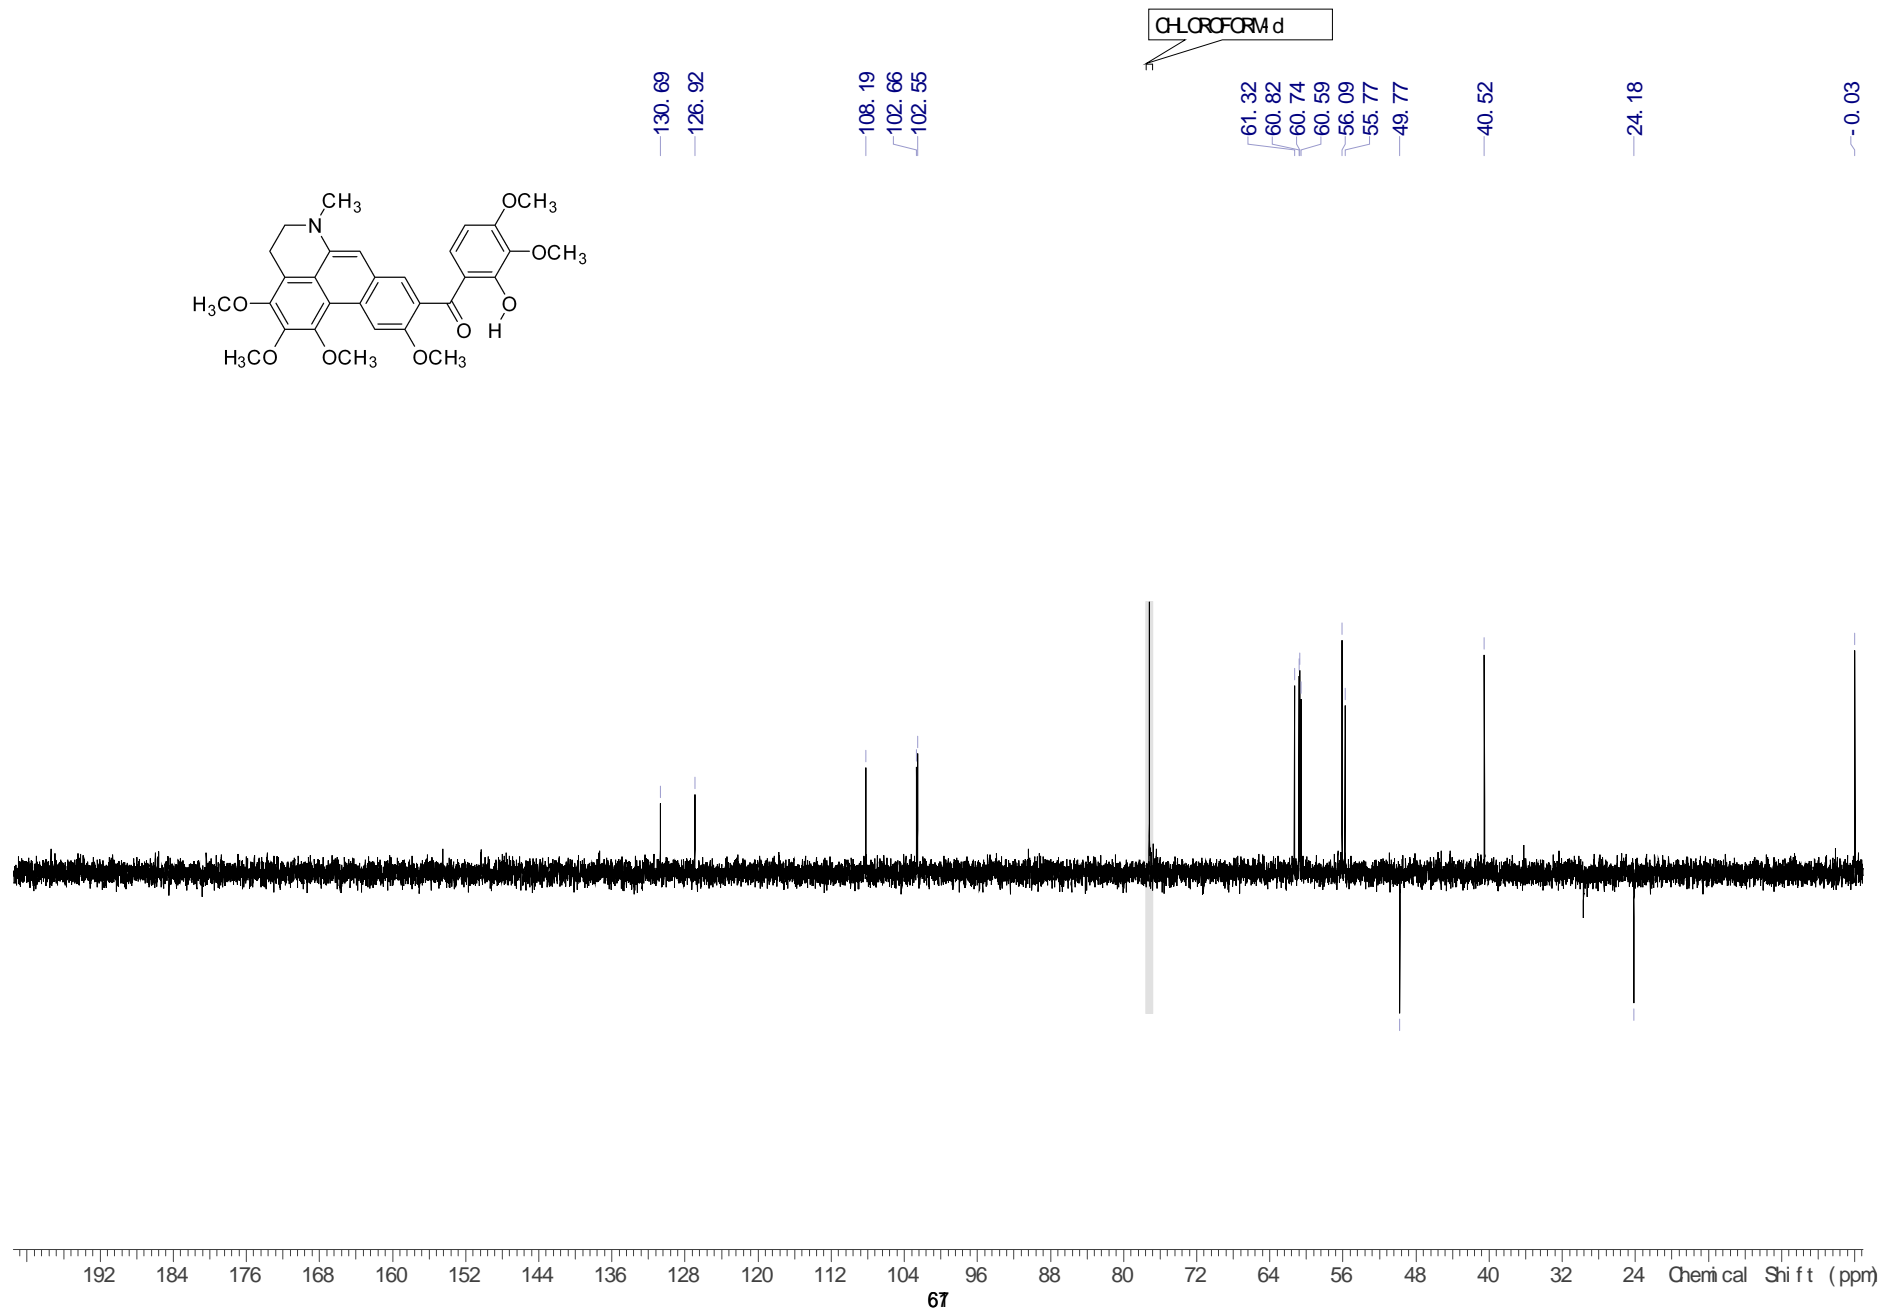

Figure S25. HSQC spectrum of thalfoetine C (**3**) in CDCl<sub>3</sub> (600 MHz)

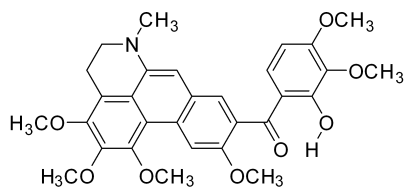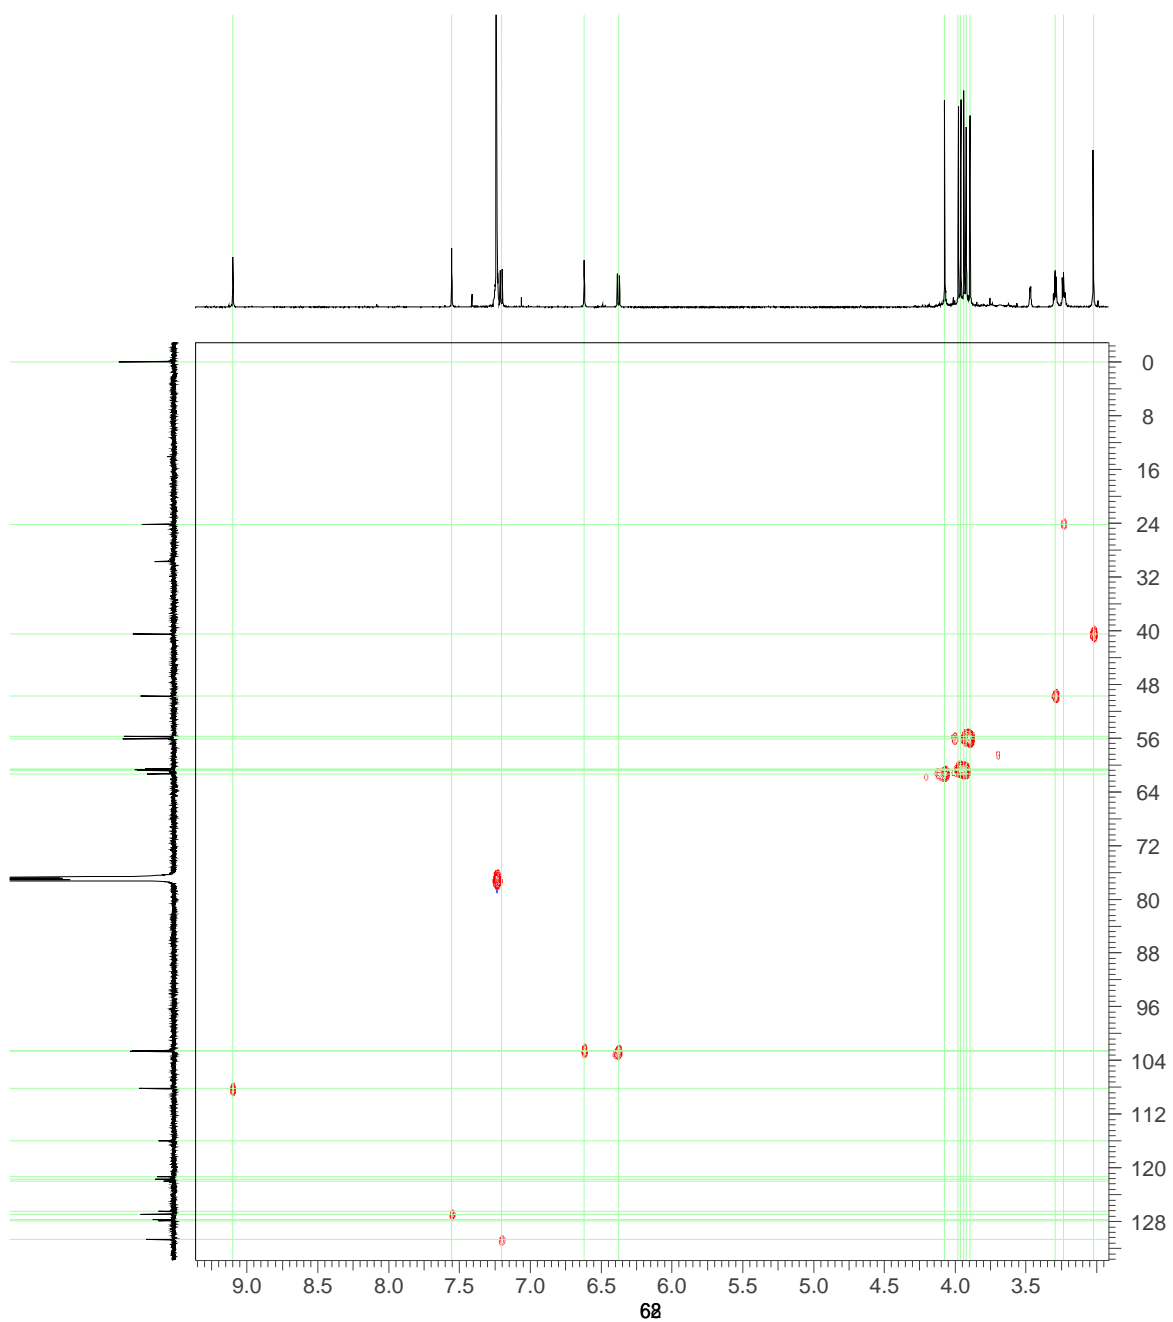

Figure S25-1. The partially enlarged HSQC spectrum of thalfoetine C (**3**)

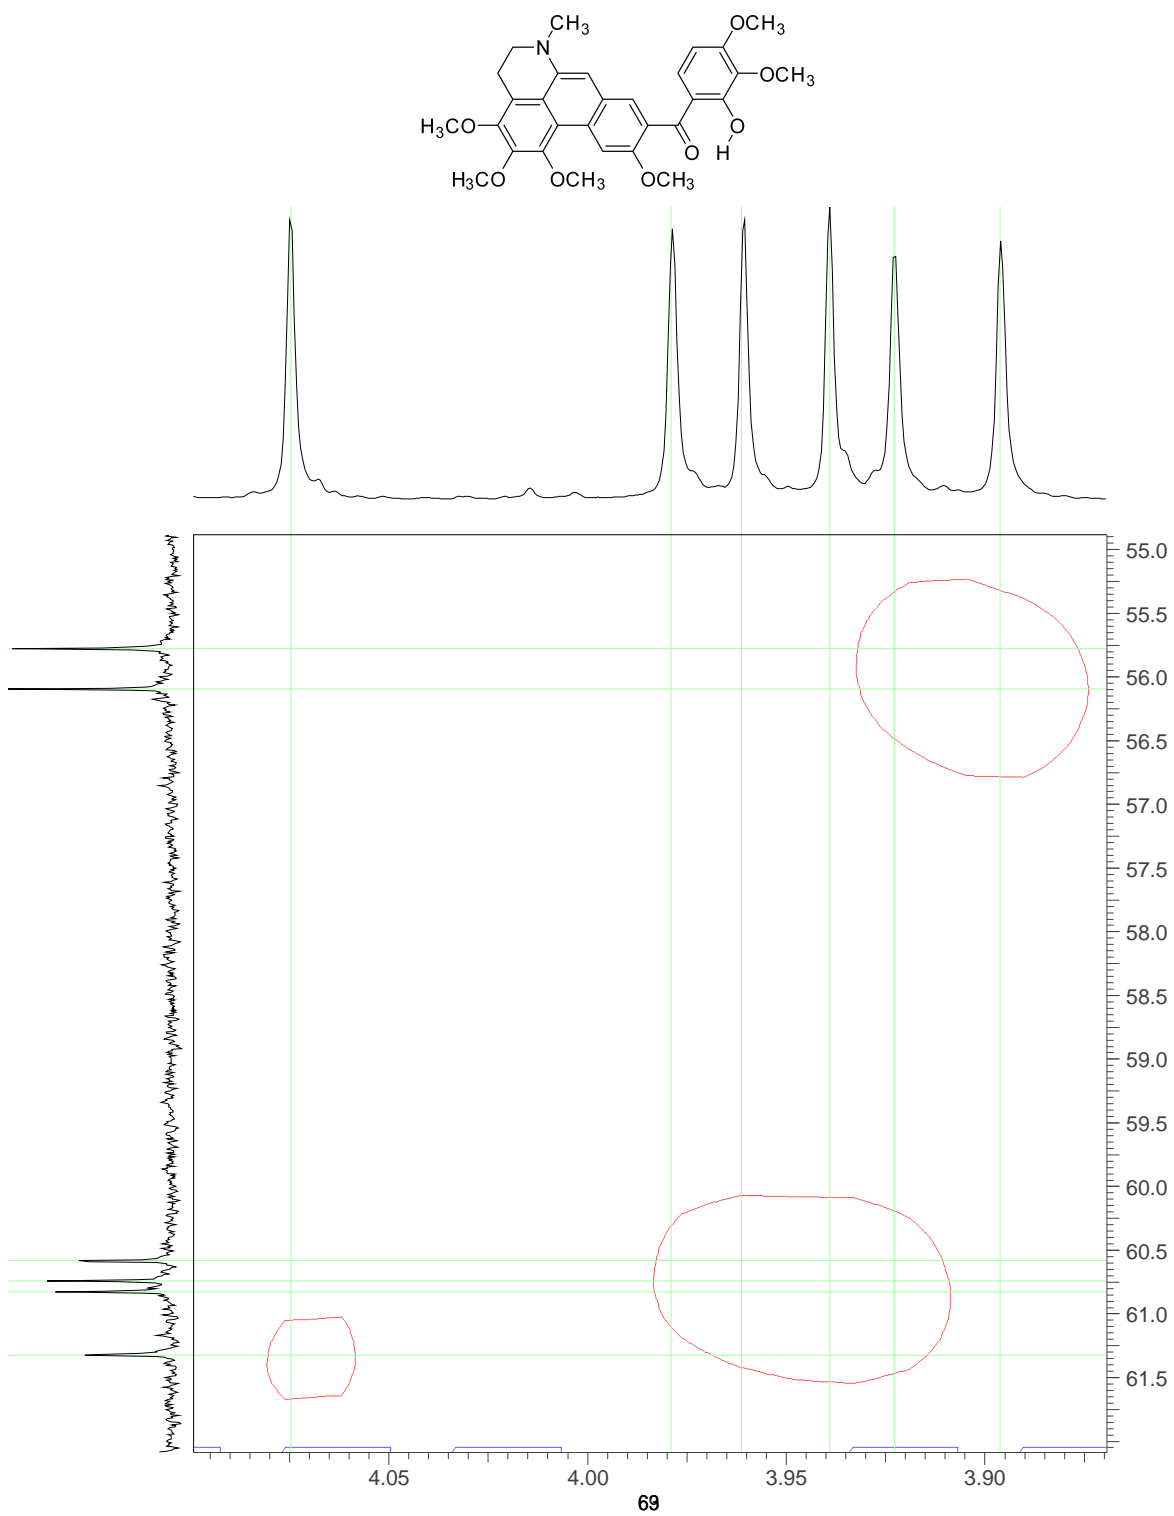

Figure S25-2. The partially enlarged HSQC spectrum of thalfoetine C (**3**)

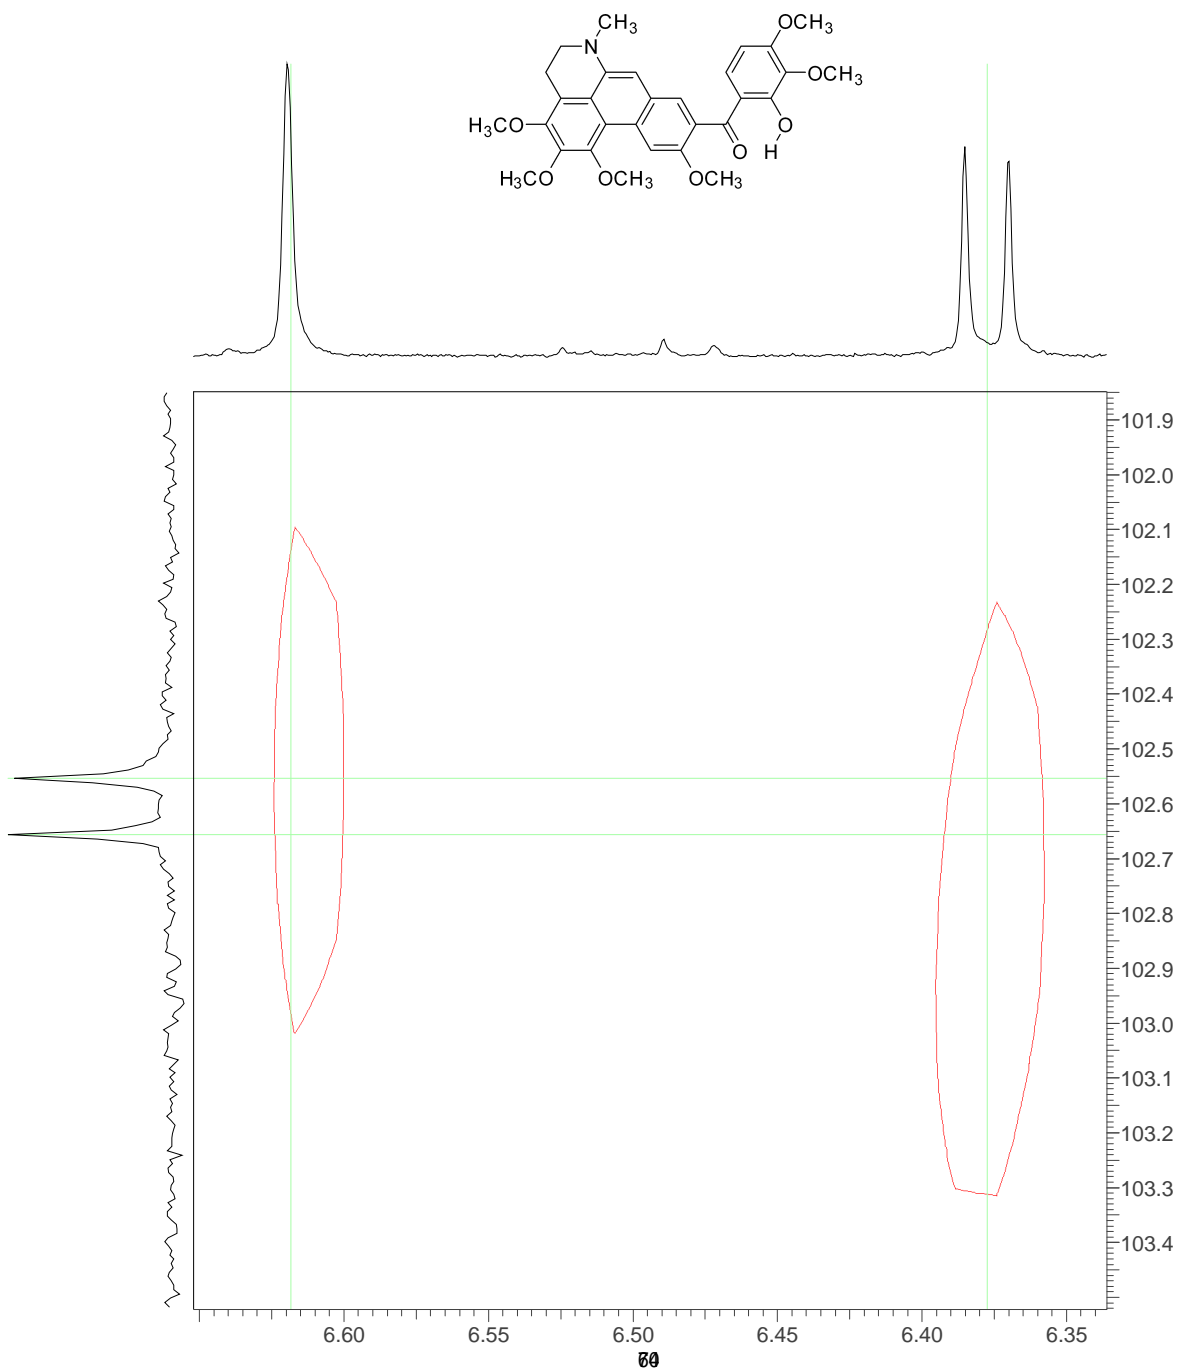

Figure S26. HMBC spectrum of thalfoetine C (**3**) in CDCl<sub>3</sub> (600 MHz)

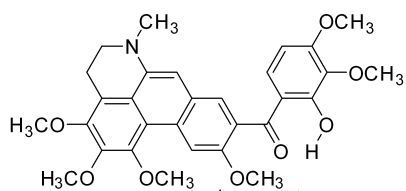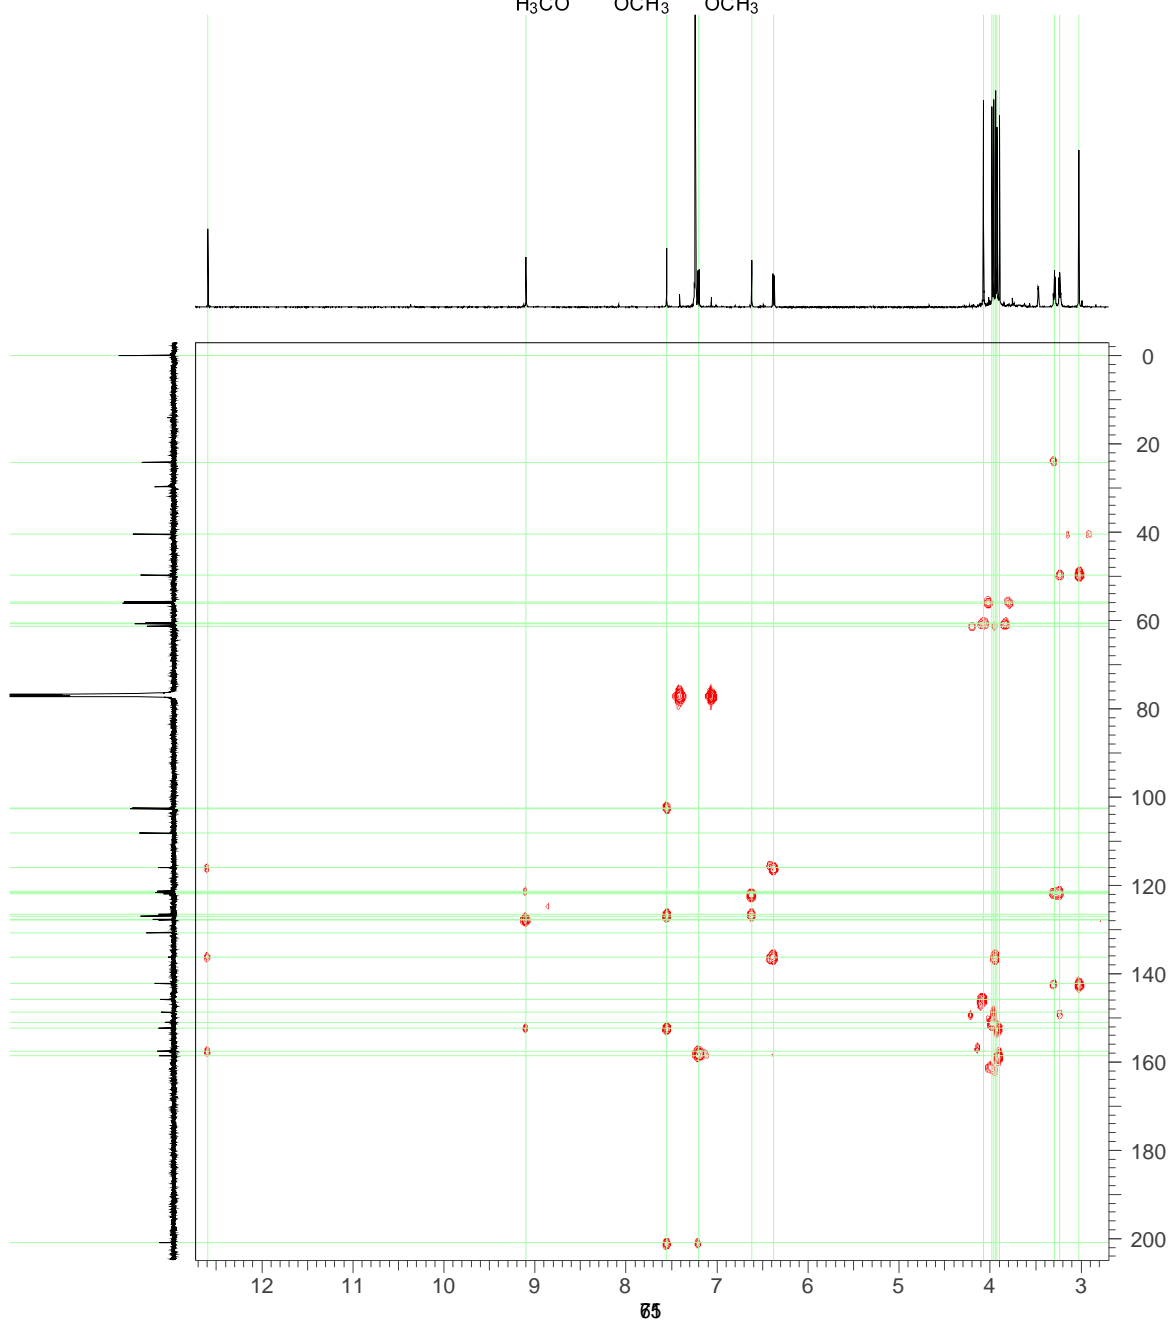

Figure S26-1. The partially enlarged HMBC spectrum of thalfoetine C (**3**)

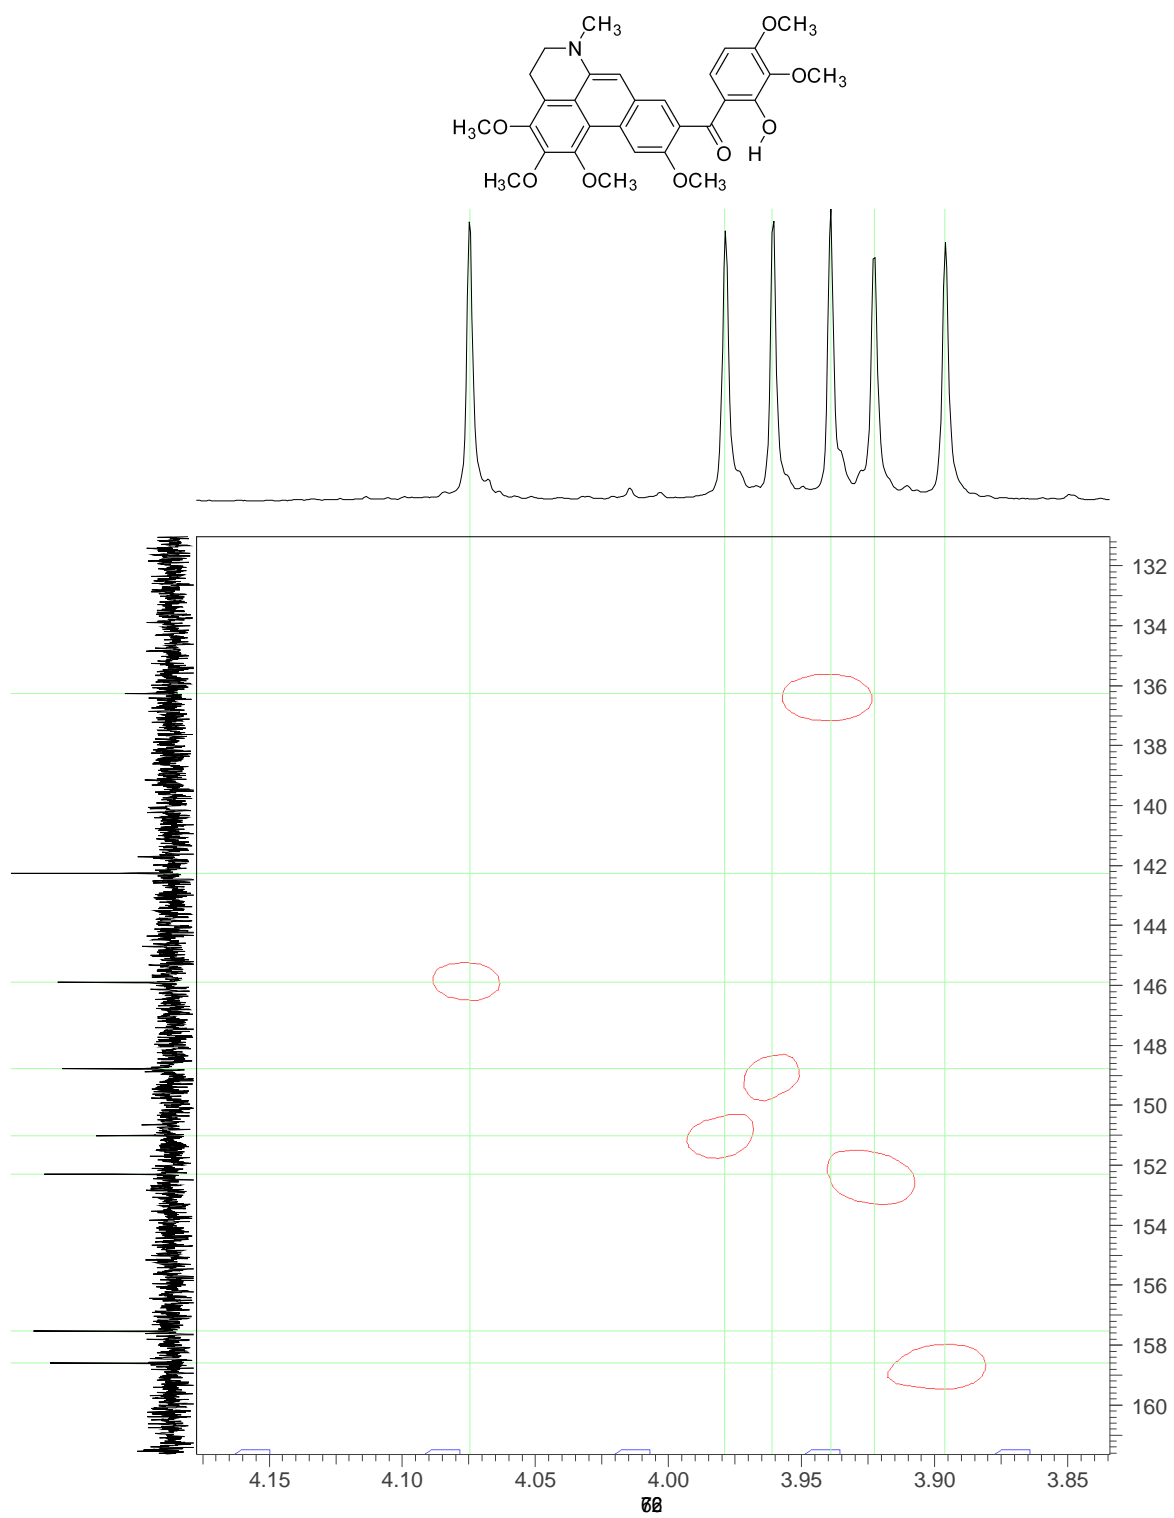



Figure S26-2. The partially enlarged HMBC spectrum of thalfoetine C (3)

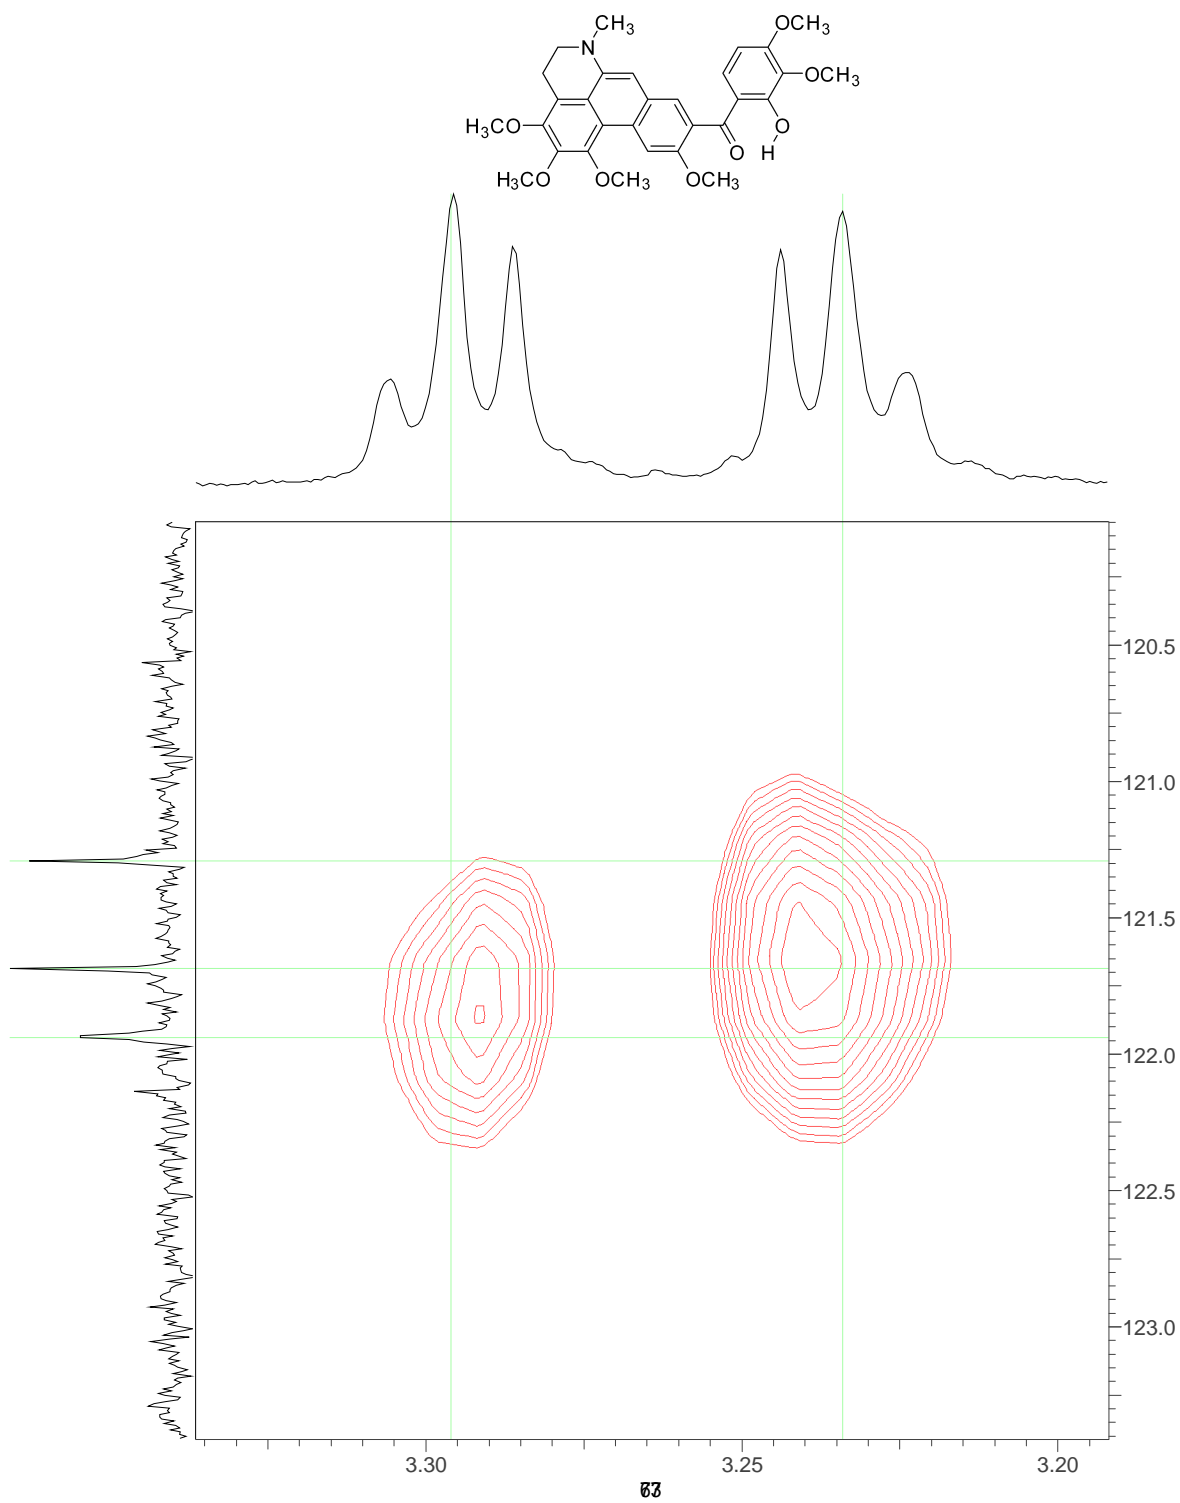

Figure S26-3. The partially enlarged HMBC spectrum of thalfoetine C (**3**)

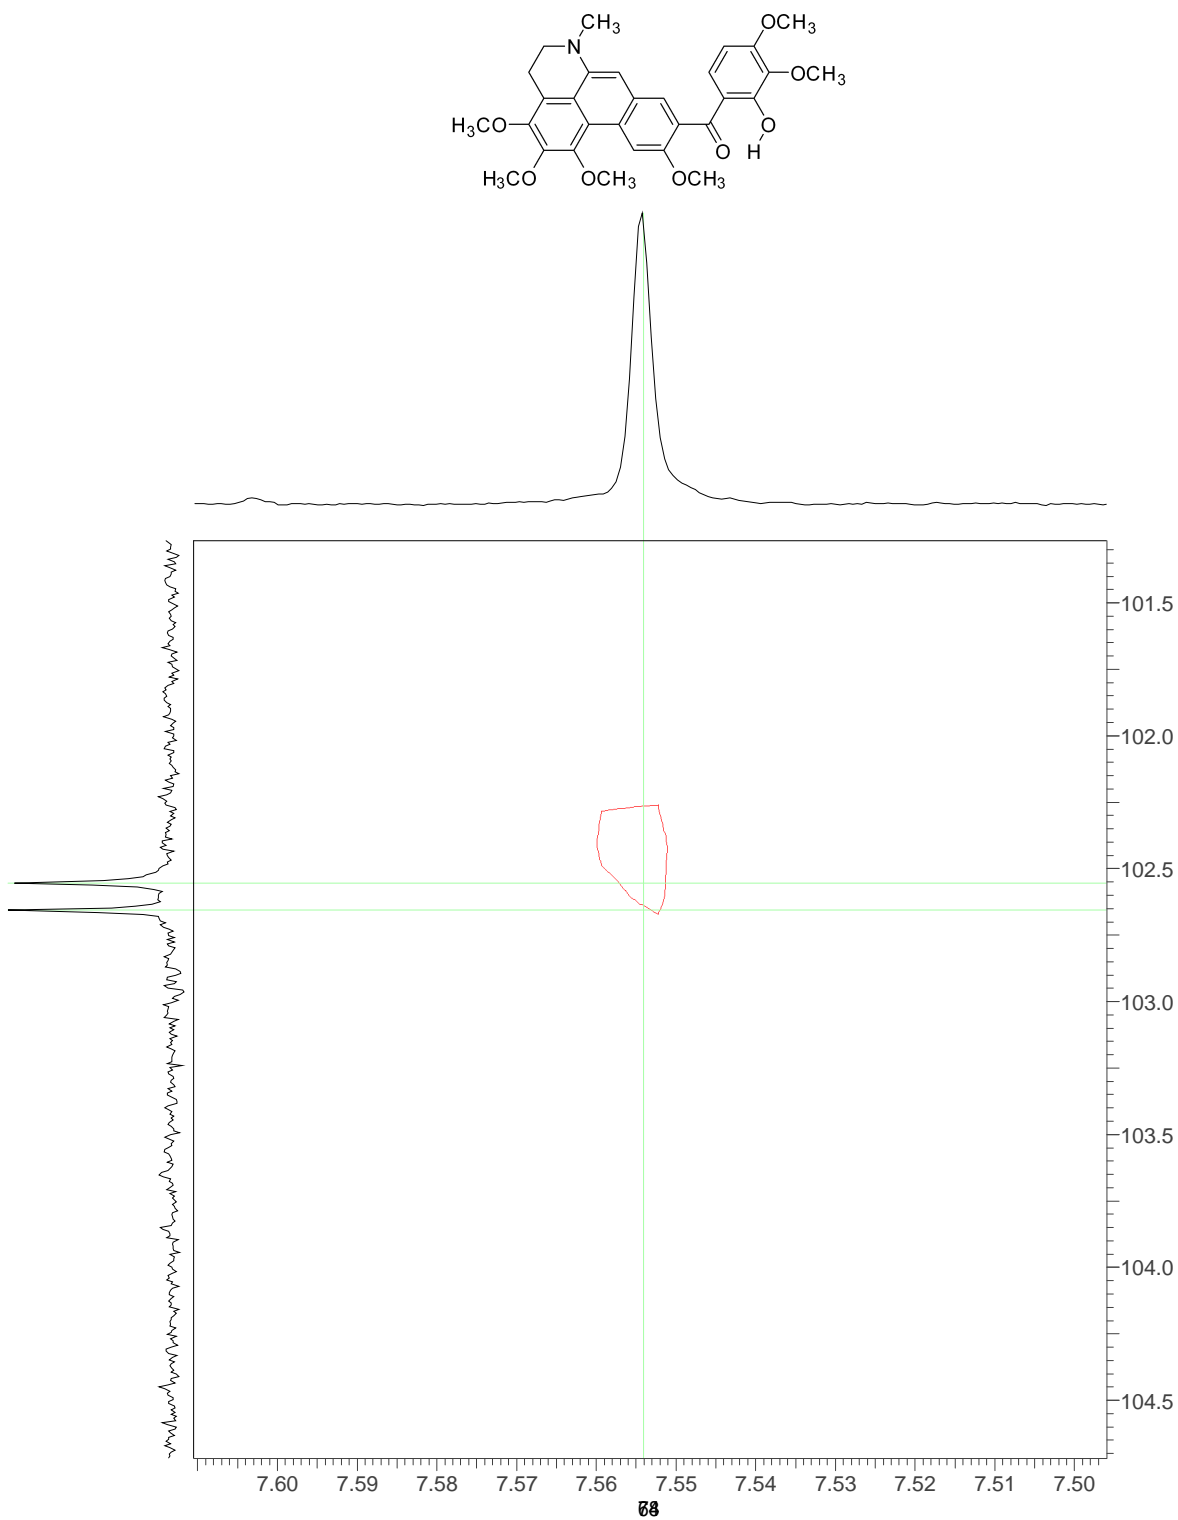

Figure S26-4. The partially enlarged HMBC spectrum of thalfoetine C (**3**)

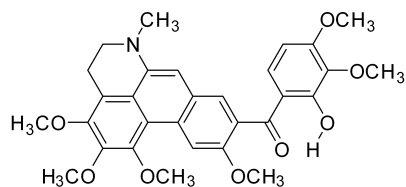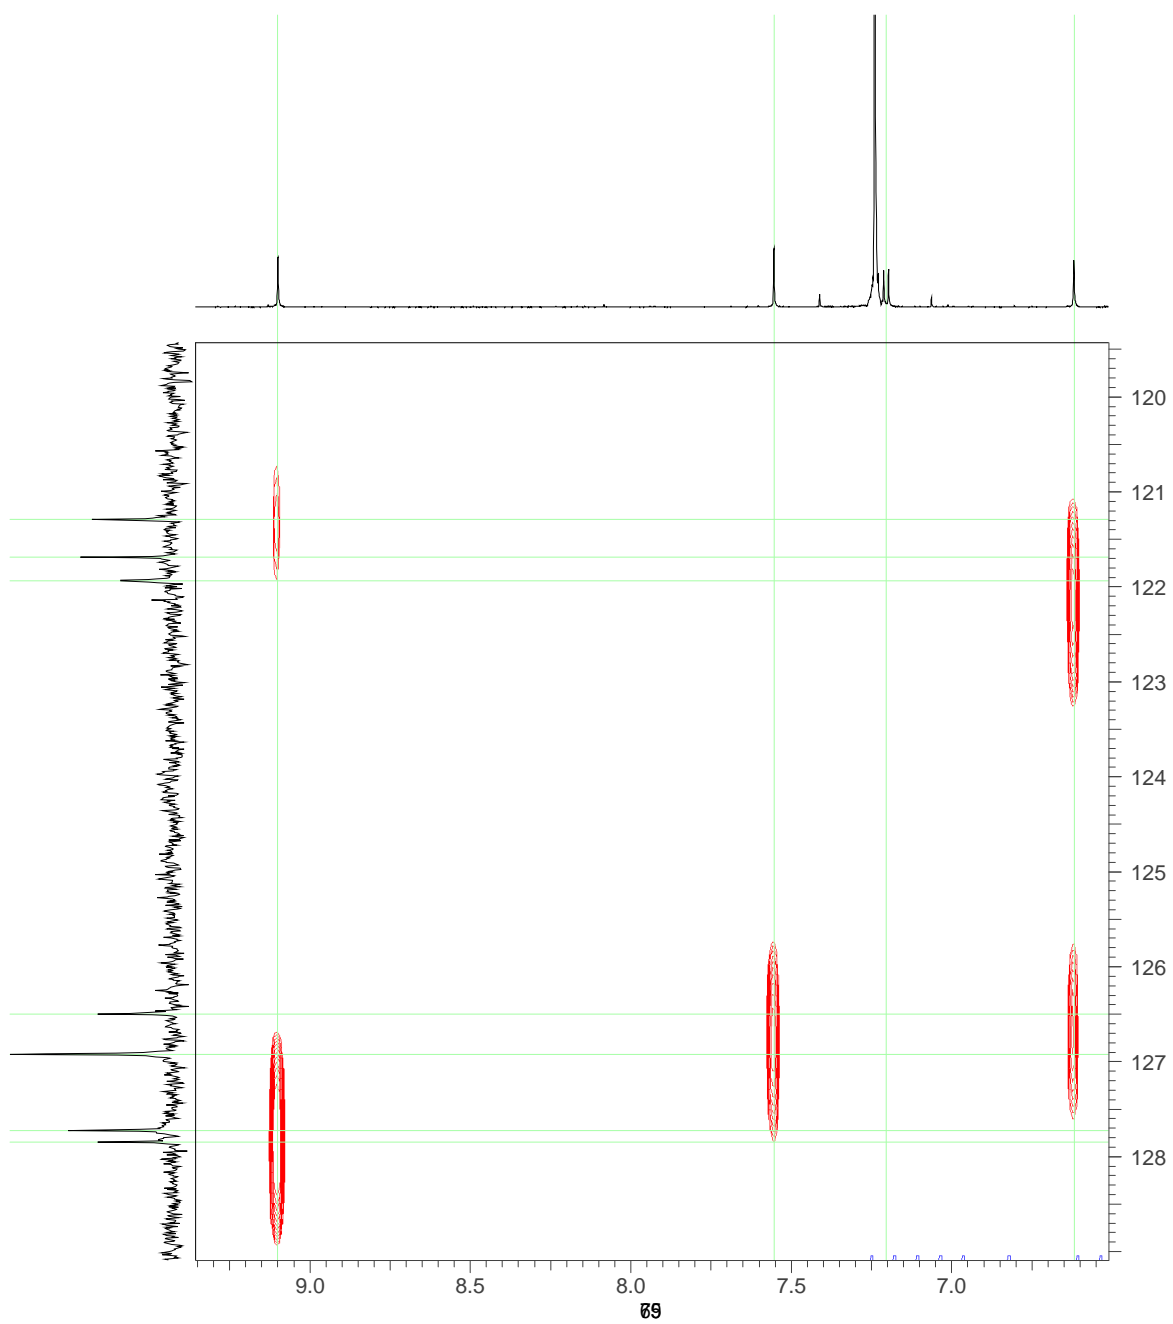

Figure S26-5. The partially enlarged HMBC spectrum of thalfoetine C (**3**)

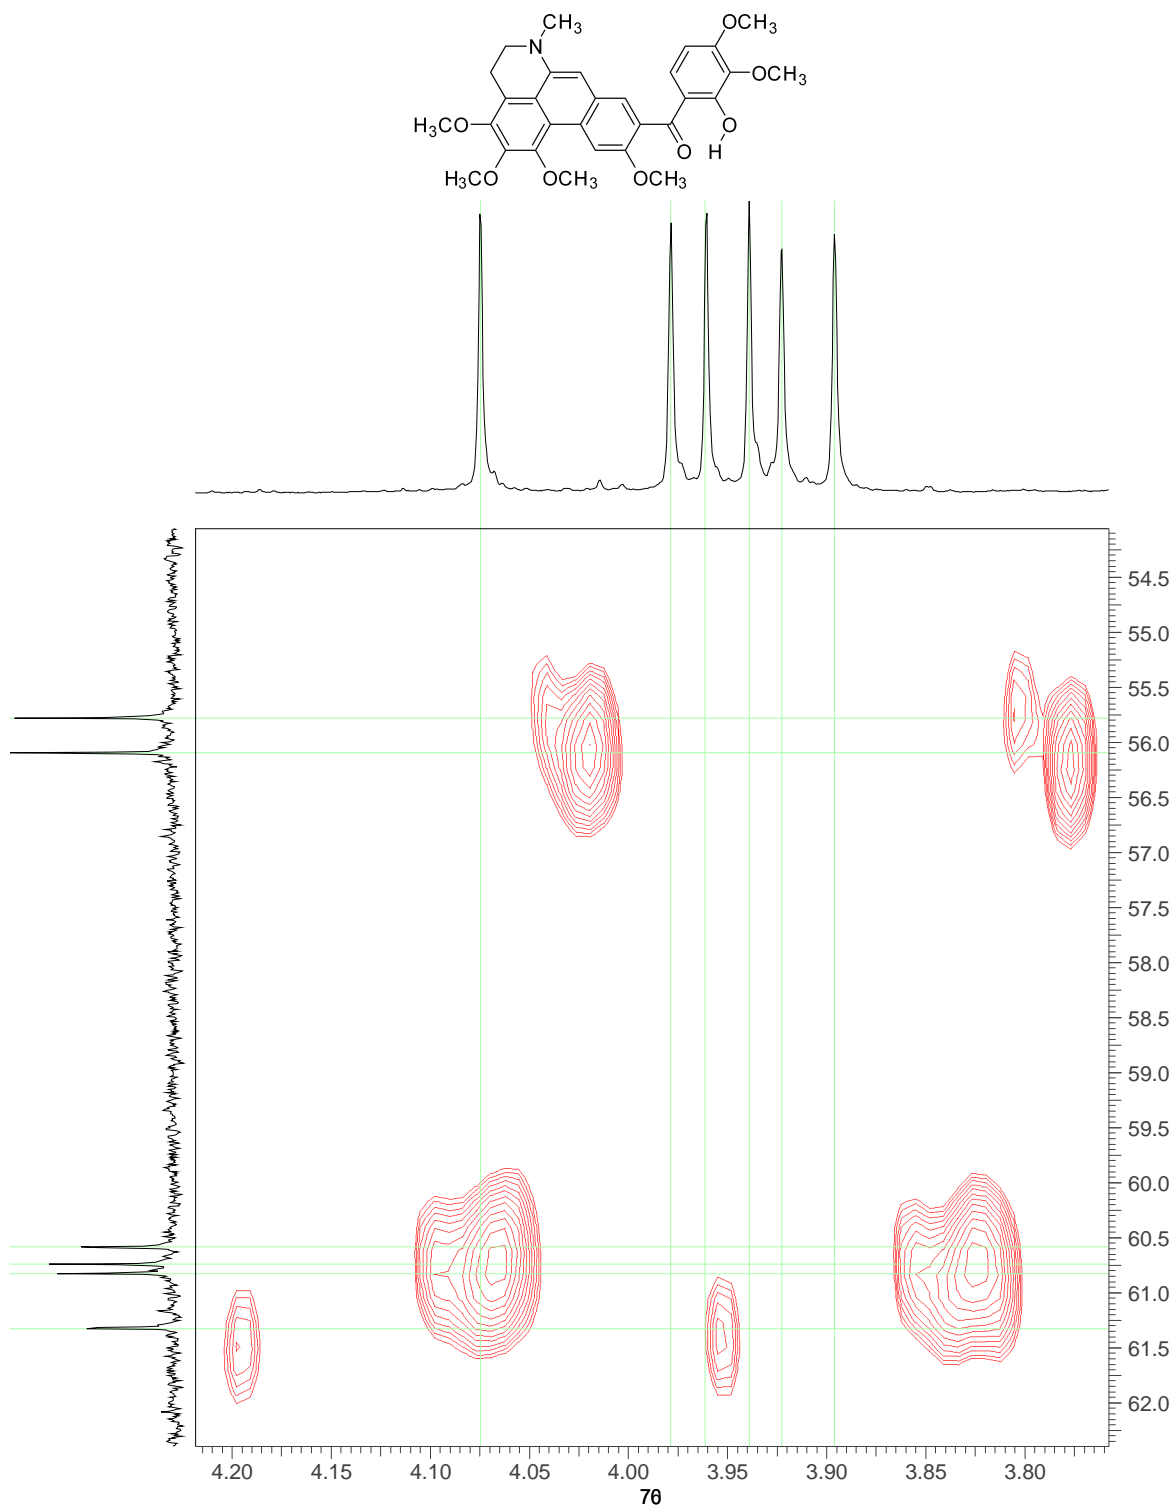

Figure S27. ROESY spectrum of thalfoetine C (**3**) in CDCl<sub>3</sub> (600 MHz)

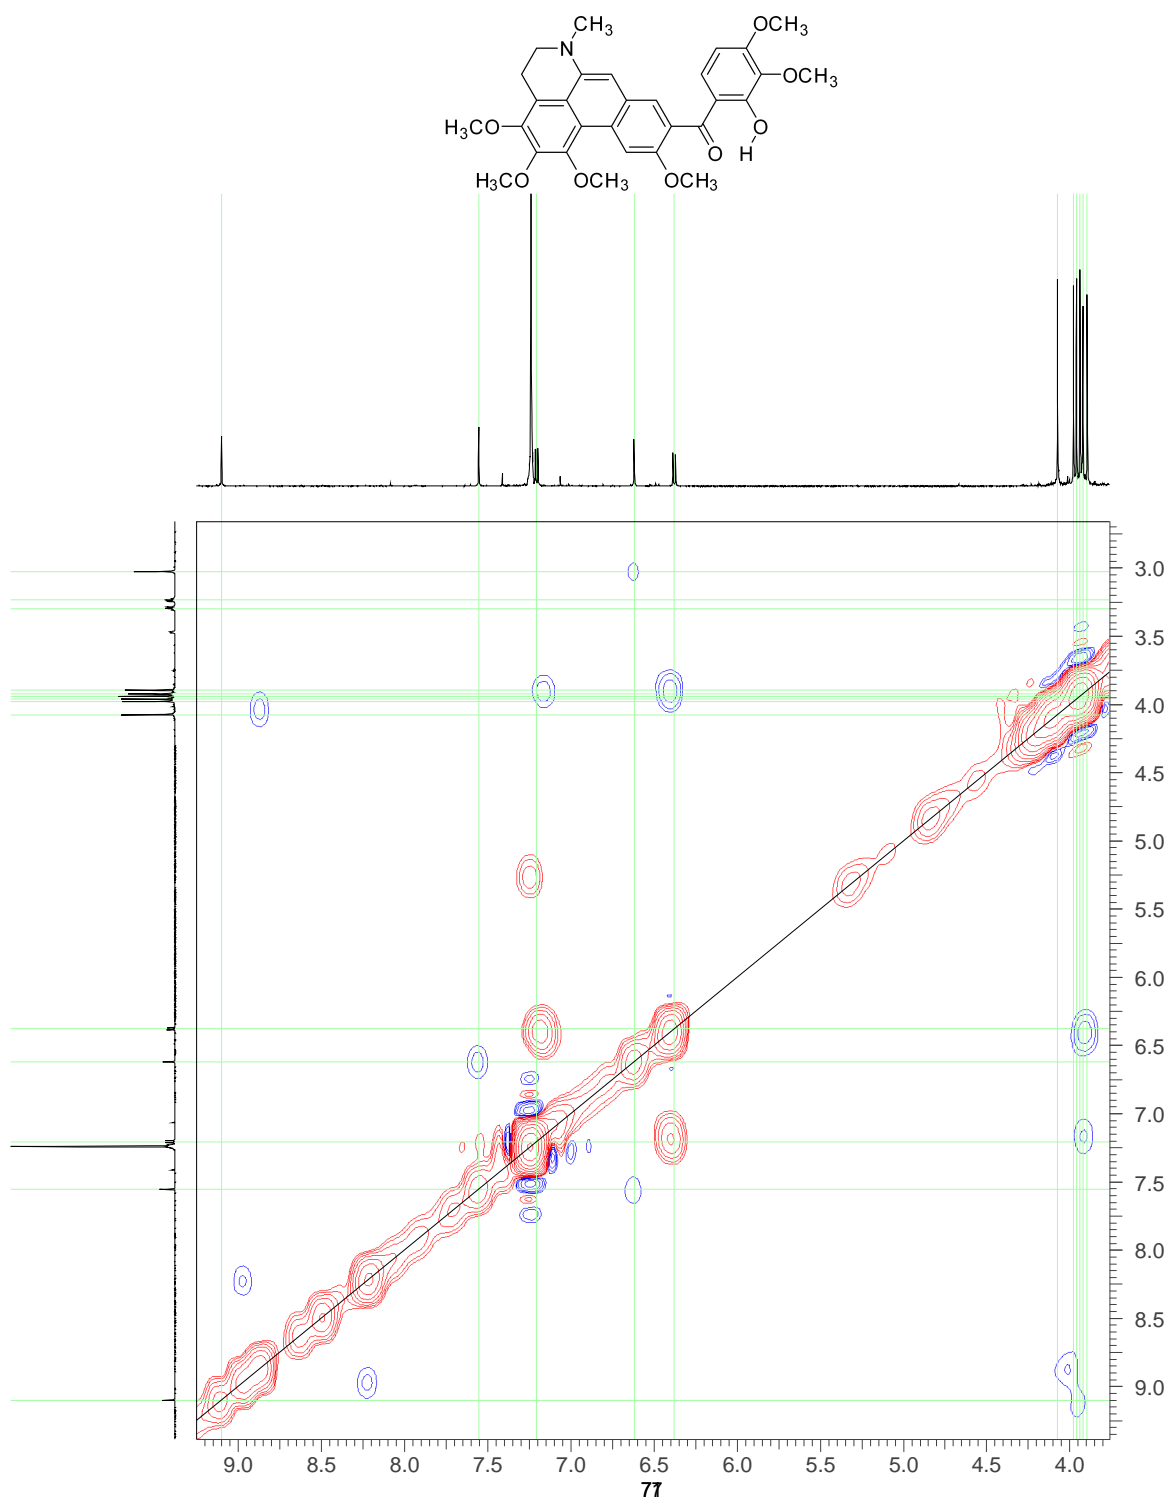

# Figure S28. HREIMS spectrum of thalfoetine D (4)

Data File: E:\DATA\2017\0531\wtflr-8.lcd

| Elmt | Val. | Min | Max | Use Adduct |
|------|------|-----|-----|------|------|-----|-----|------|------|-----|-----|------|------|-----|-----|------------|
| H    | 1    | 0   | 150 | O    | 2    | 0   | 50  | S    | 2    | 0   | 0   | Pt   | 2    | 0   | 0   | Na         |
| B    | 3    | 0   | 0   | F    | 1    | 0   | 0   | Cl   | 1    | 0   | 0   |      |      |     |     |            |
| C    | 4    | 0   | 100 | Na   | 1    | 0   | 0   | Br   | 1    | 0   | 0   |      |      |     |     |            |
| N    | 3    | 0   | 15  | Si   | 4    | 0   | 0   | I    | 3    | 0   | 0   |      |      |     |     |            |

Error Margin (ppm): 10  
 HC Ratio: unlimited  
 Max Isotopes: all  
 MSn Iso RI (%): 75.00

DBE Range: -2.0 - 100.0  
 Apply N Rule: yes  
 Isotope RI (%): 1.00  
 MSn Logic Mode: AND

Electron Ions: both  
 Use MSn Info: yes  
 Isotope Res: 10000  
 Max Results: 100

Event#: 1 MS(E+) Ret. Time : 0.420 Scan# : 85

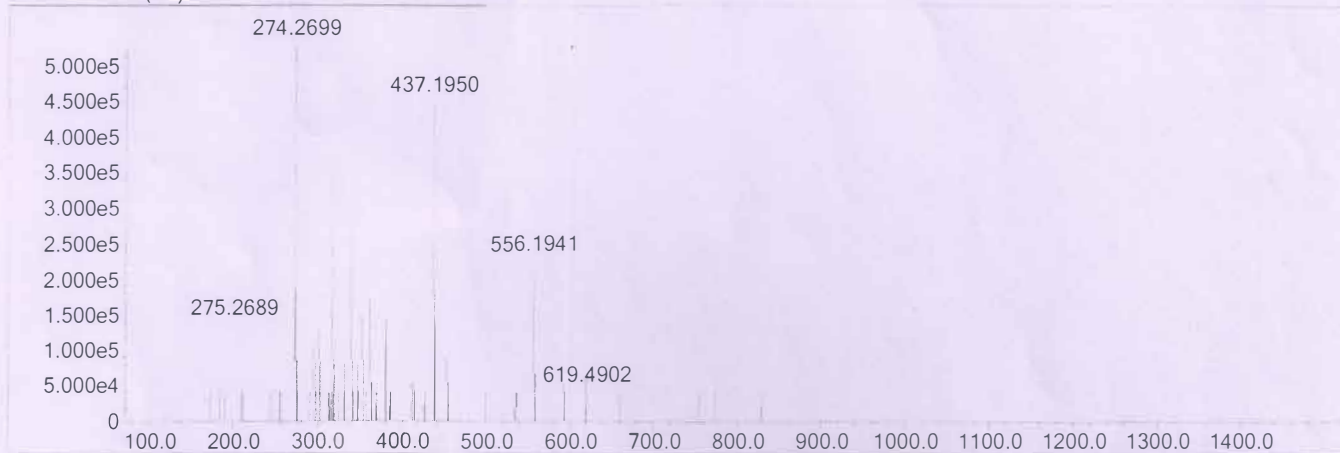

Measured region for 556.1941 m/z

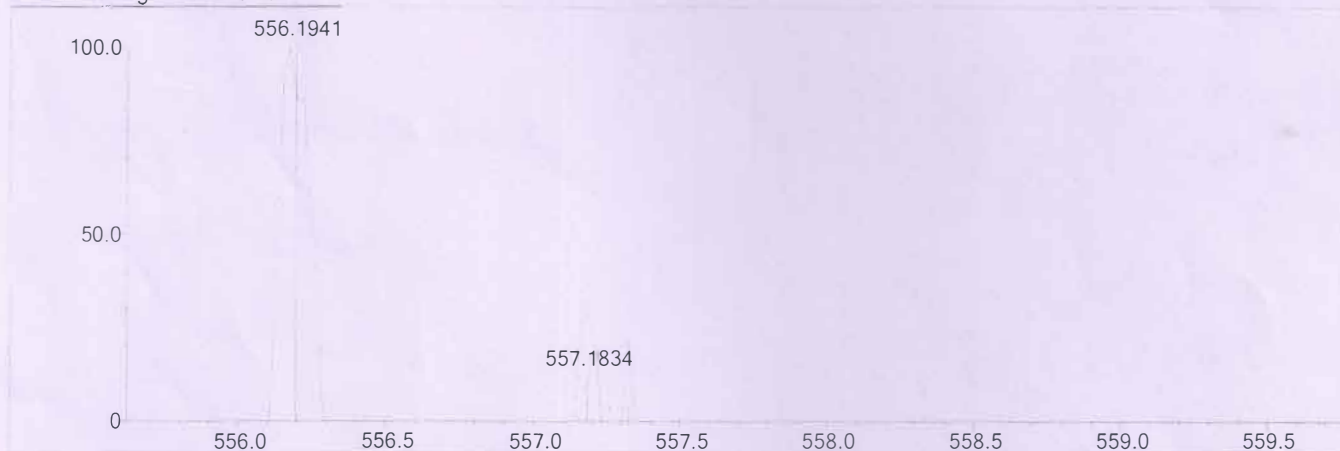

C30 H31 N O8 [M+Na]+ : Predicted region for 556.1942 m/z

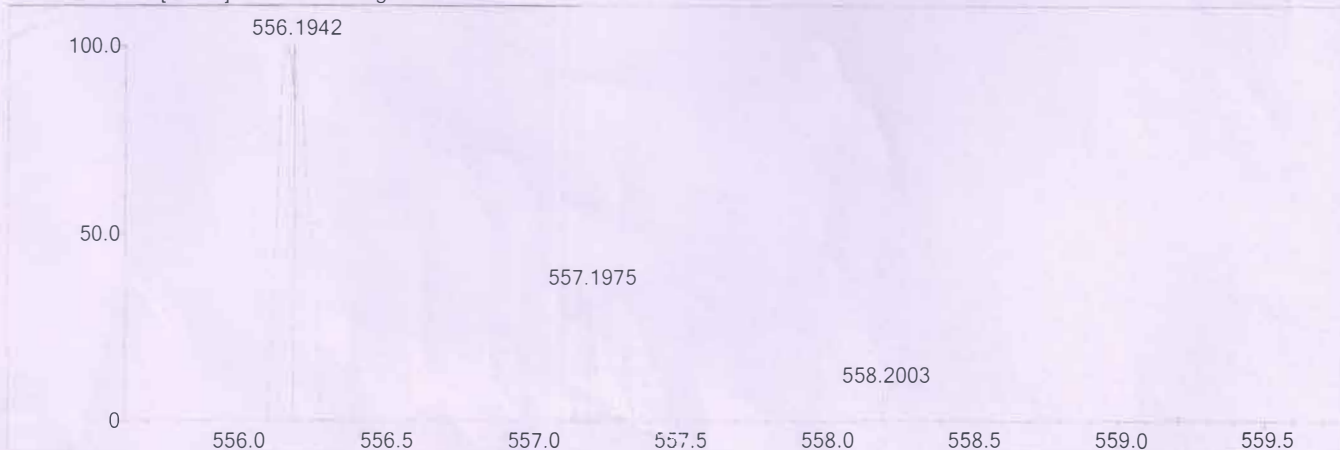

| Formula (M)  | Ion                 | Meas. m/z | Pred. m/z | Df. (mDa) | Df. (ppm) | DBE  |
|--------------|---------------------|-----------|-----------|-----------|-----------|------|
| C30 H31 N O8 | [M+Na] <sup>+</sup> | 556.1941  | 556.1942  | -0.1      | -0.18     | 16.0 |

Figure S29. IR spectrum of thalfoetine D (4)

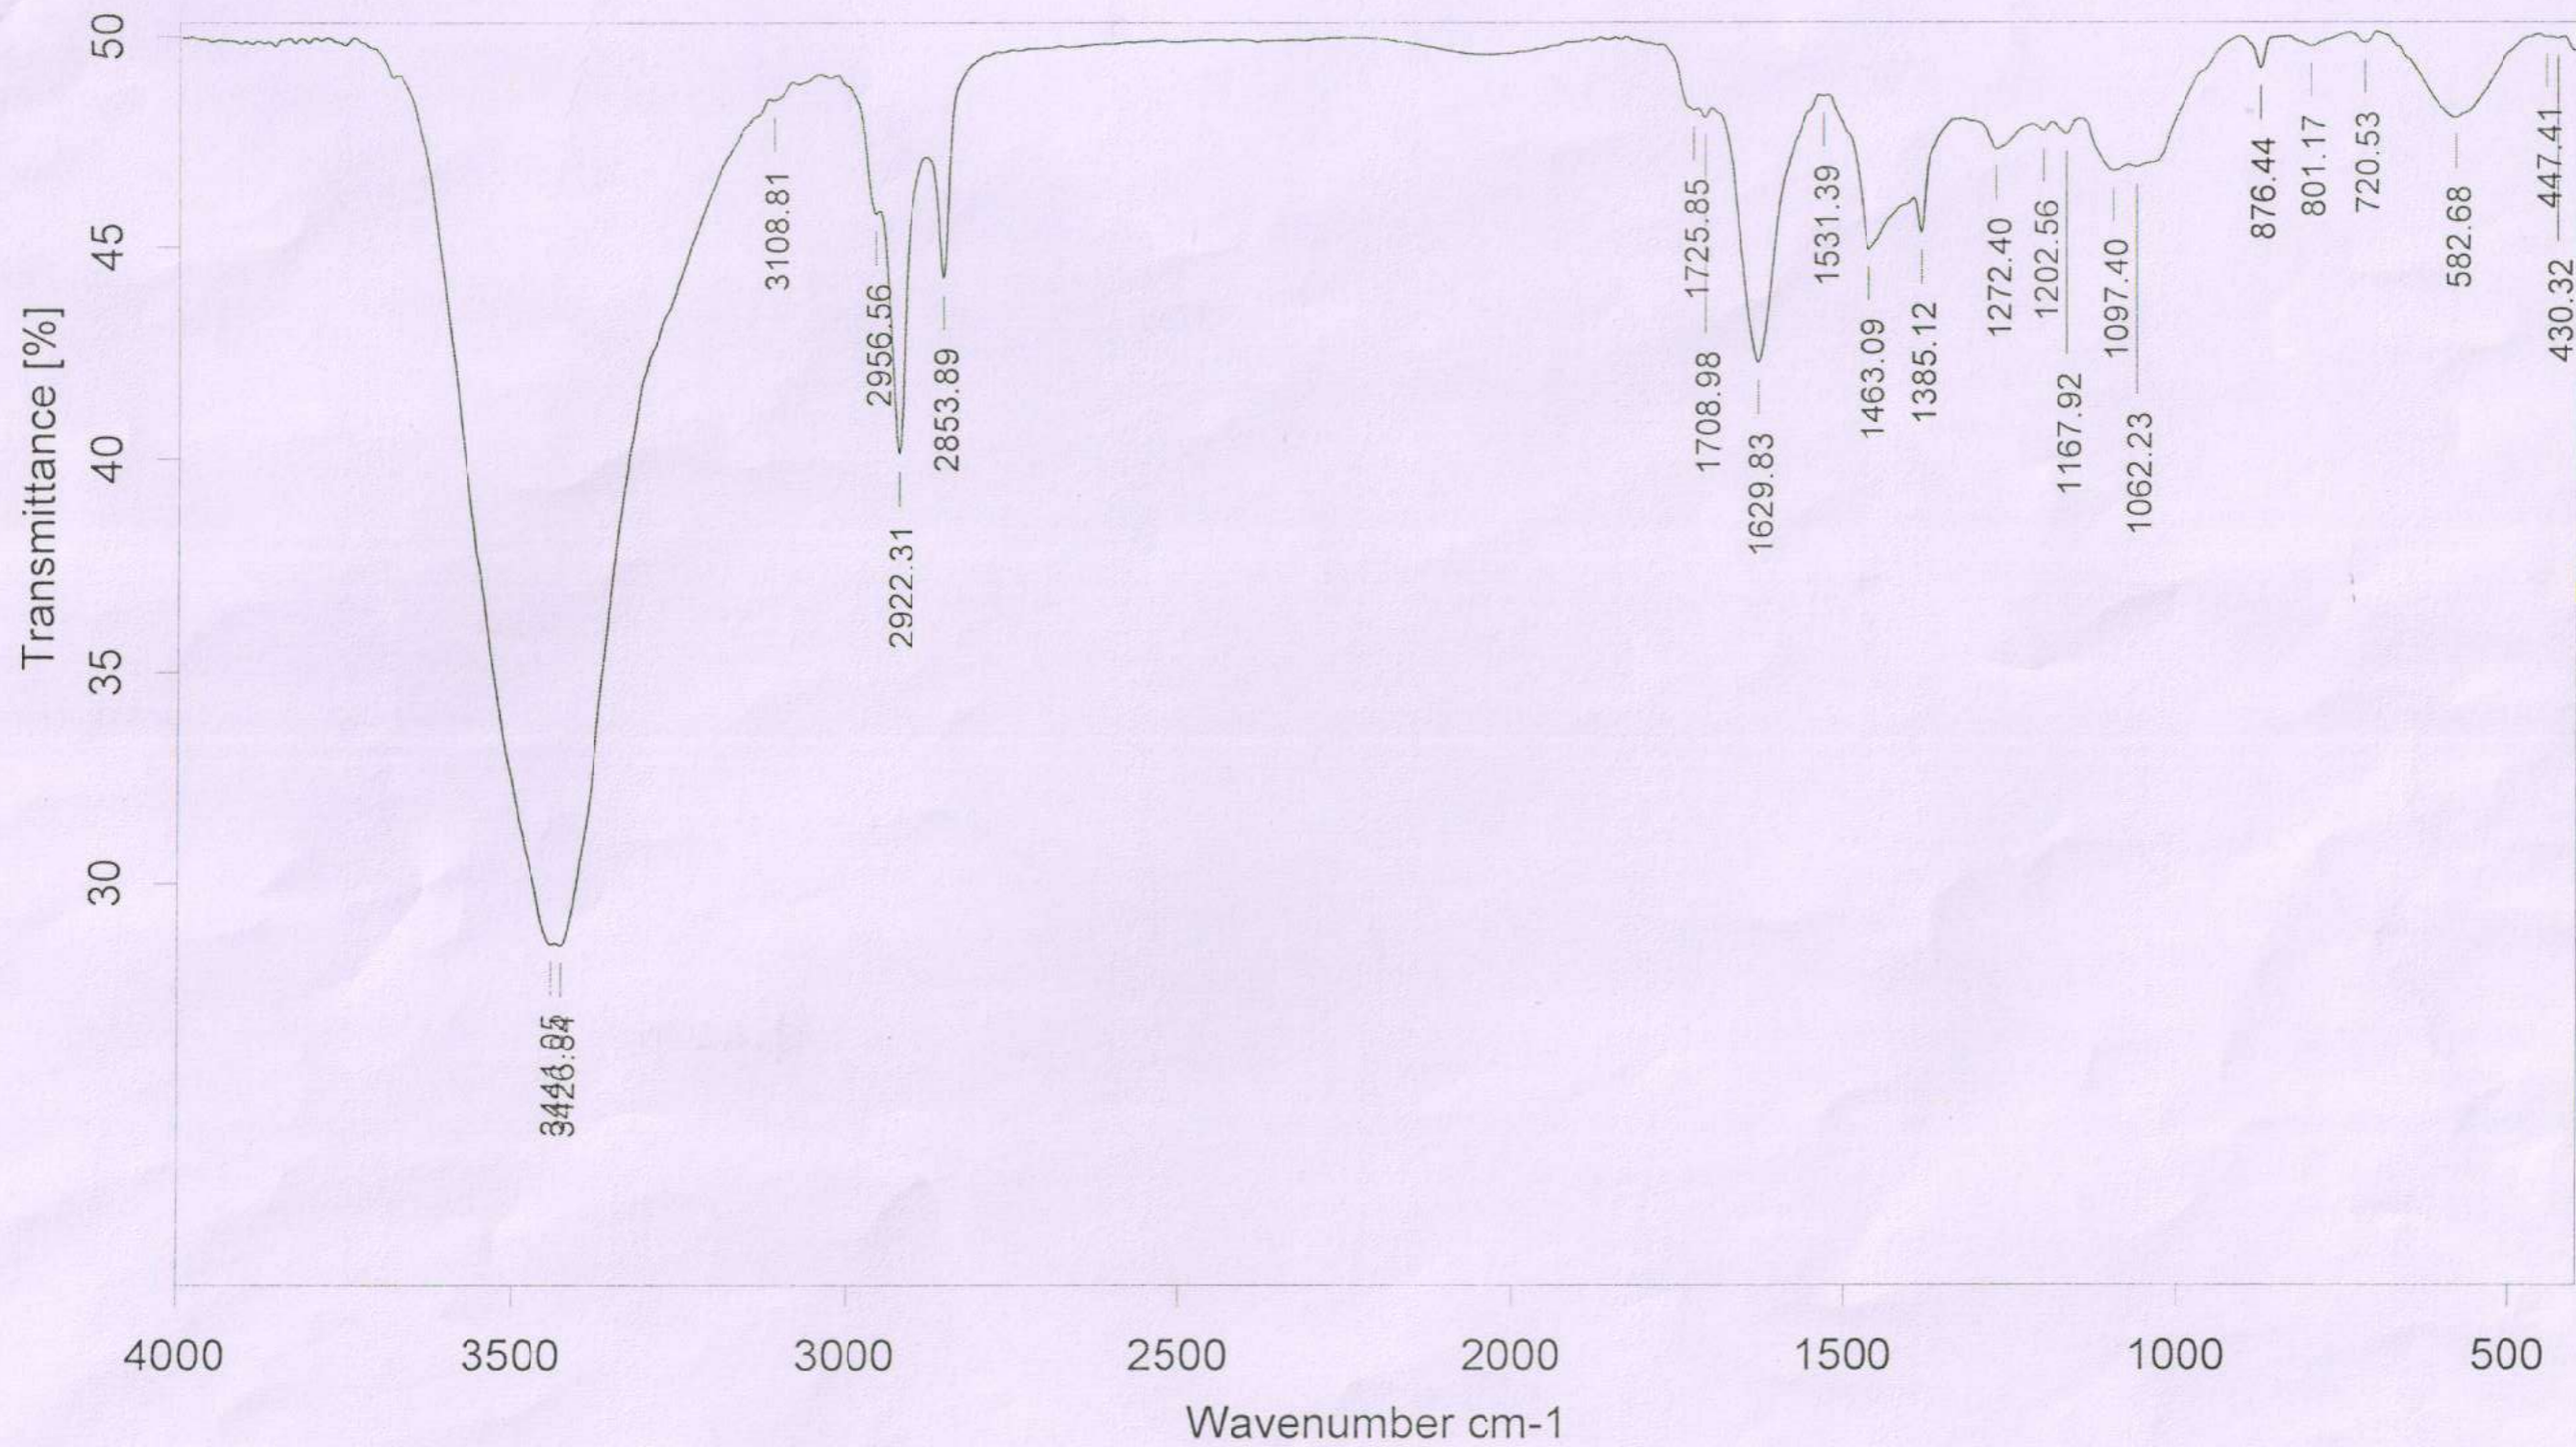

|                      |                 |                                     |                          |
|----------------------|-----------------|-------------------------------------|--------------------------|
| Sample : wtfir-8     |                 | Frequency Range : 399.246 - 3996.32 | Measured on : 04/09/2017 |
| Technique : KBr压片    | Resolution : 4  | Instrument : Tensor27               | Sample Scans : 16        |
| Customer : 170904IR0 | Zerofilling : 2 | Acquisition : Double Sided,For      |                          |

Figure S30. UV spectrum of thalfoetine D (4)

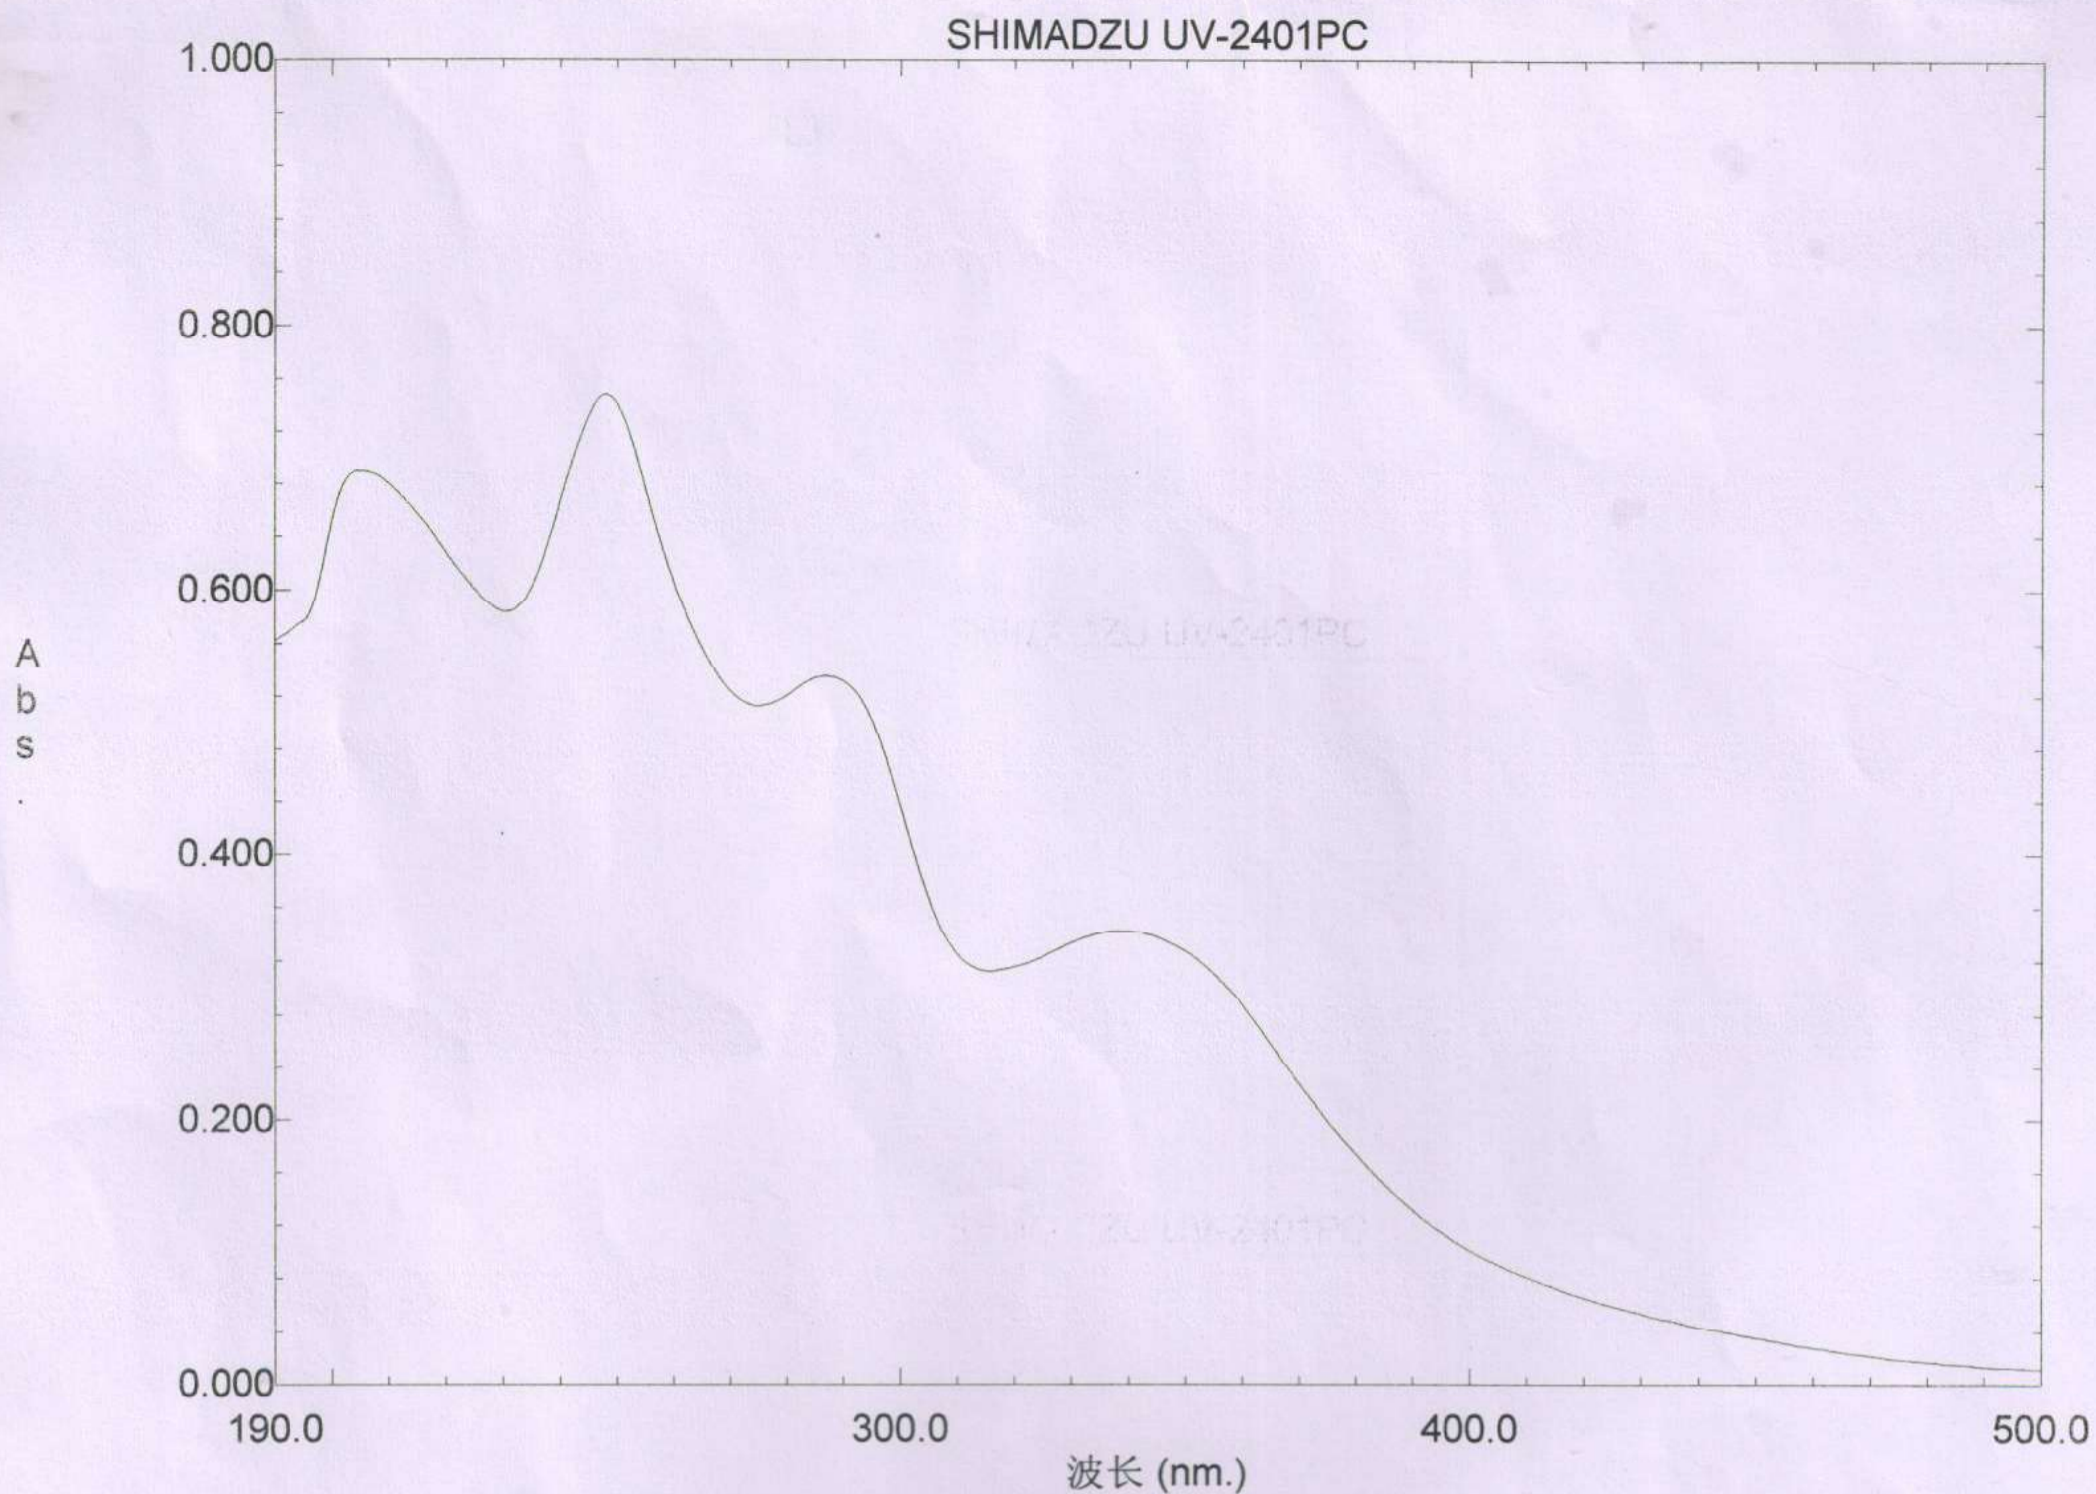

文件名: WTFLR-8

WTFLR-8

创建于: 18:02 17-09-05

数据: 原始

样品浓度: 0.0224毫克/毫升

溶剂: 甲醇

测量模式: Abs.  
扫描速度: 中速  
狭缝: 5.0  
采样间隔: 0.5

| 否. | 波长 (nm.) | Abs.   |
|----|----------|--------|
| 1  | 339.00   | 0.3424 |
| 2  | 287.00   | 0.5352 |
| 3  | 248.00   | 0.7476 |
| 4  | 205.00   | 0.6892 |



Figure S31.  $^1\text{H}$  NMR spectrum of thalfoetine D (4) in  $\text{CDCl}_3$  (600 MHz)

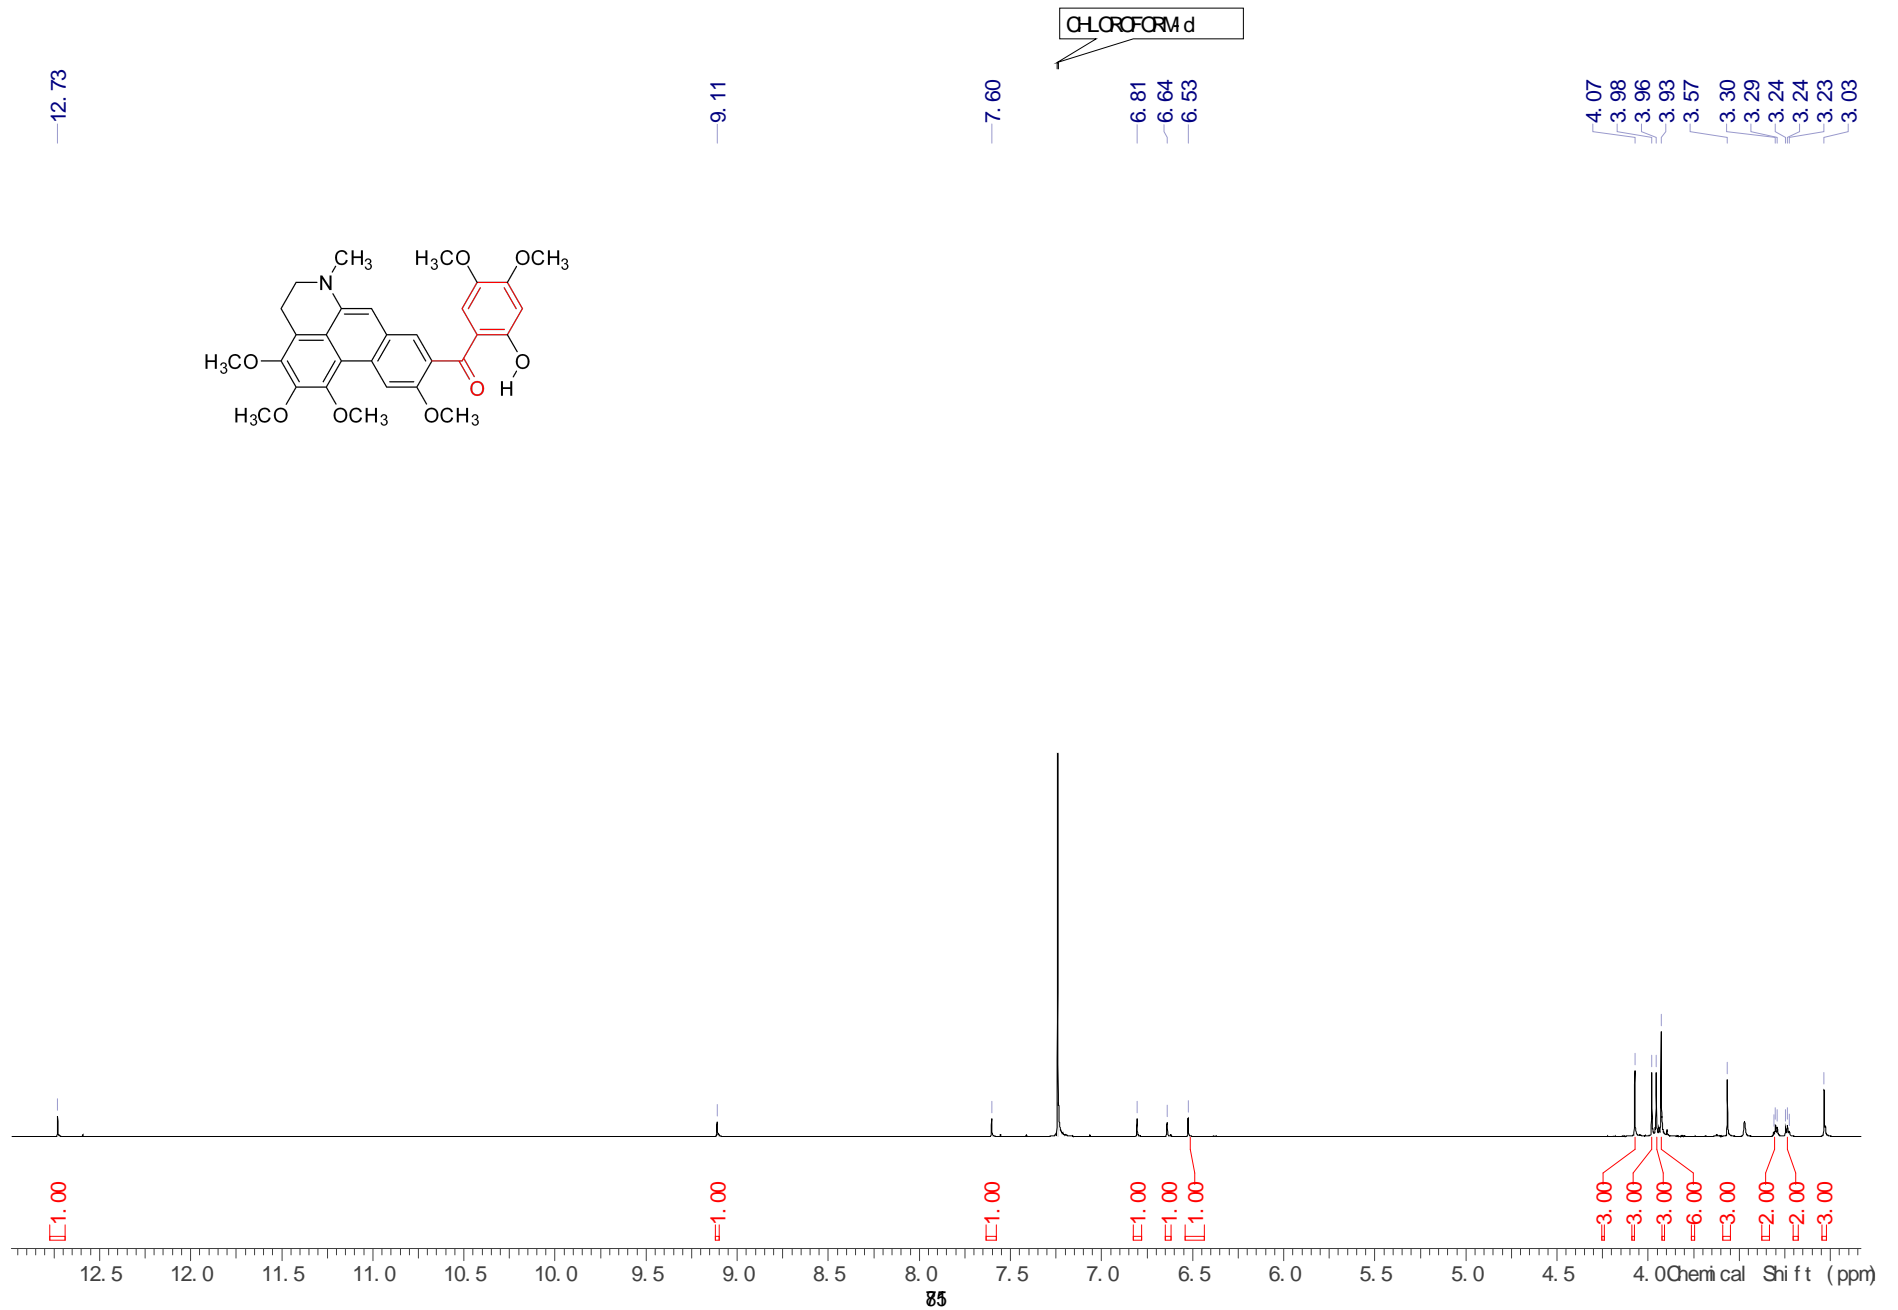

Figure S32.  $^{13}\text{C}$  NMR spectrum of thalfoetine D (**4**) in  $\text{CDCl}_3$  (150 MHz)

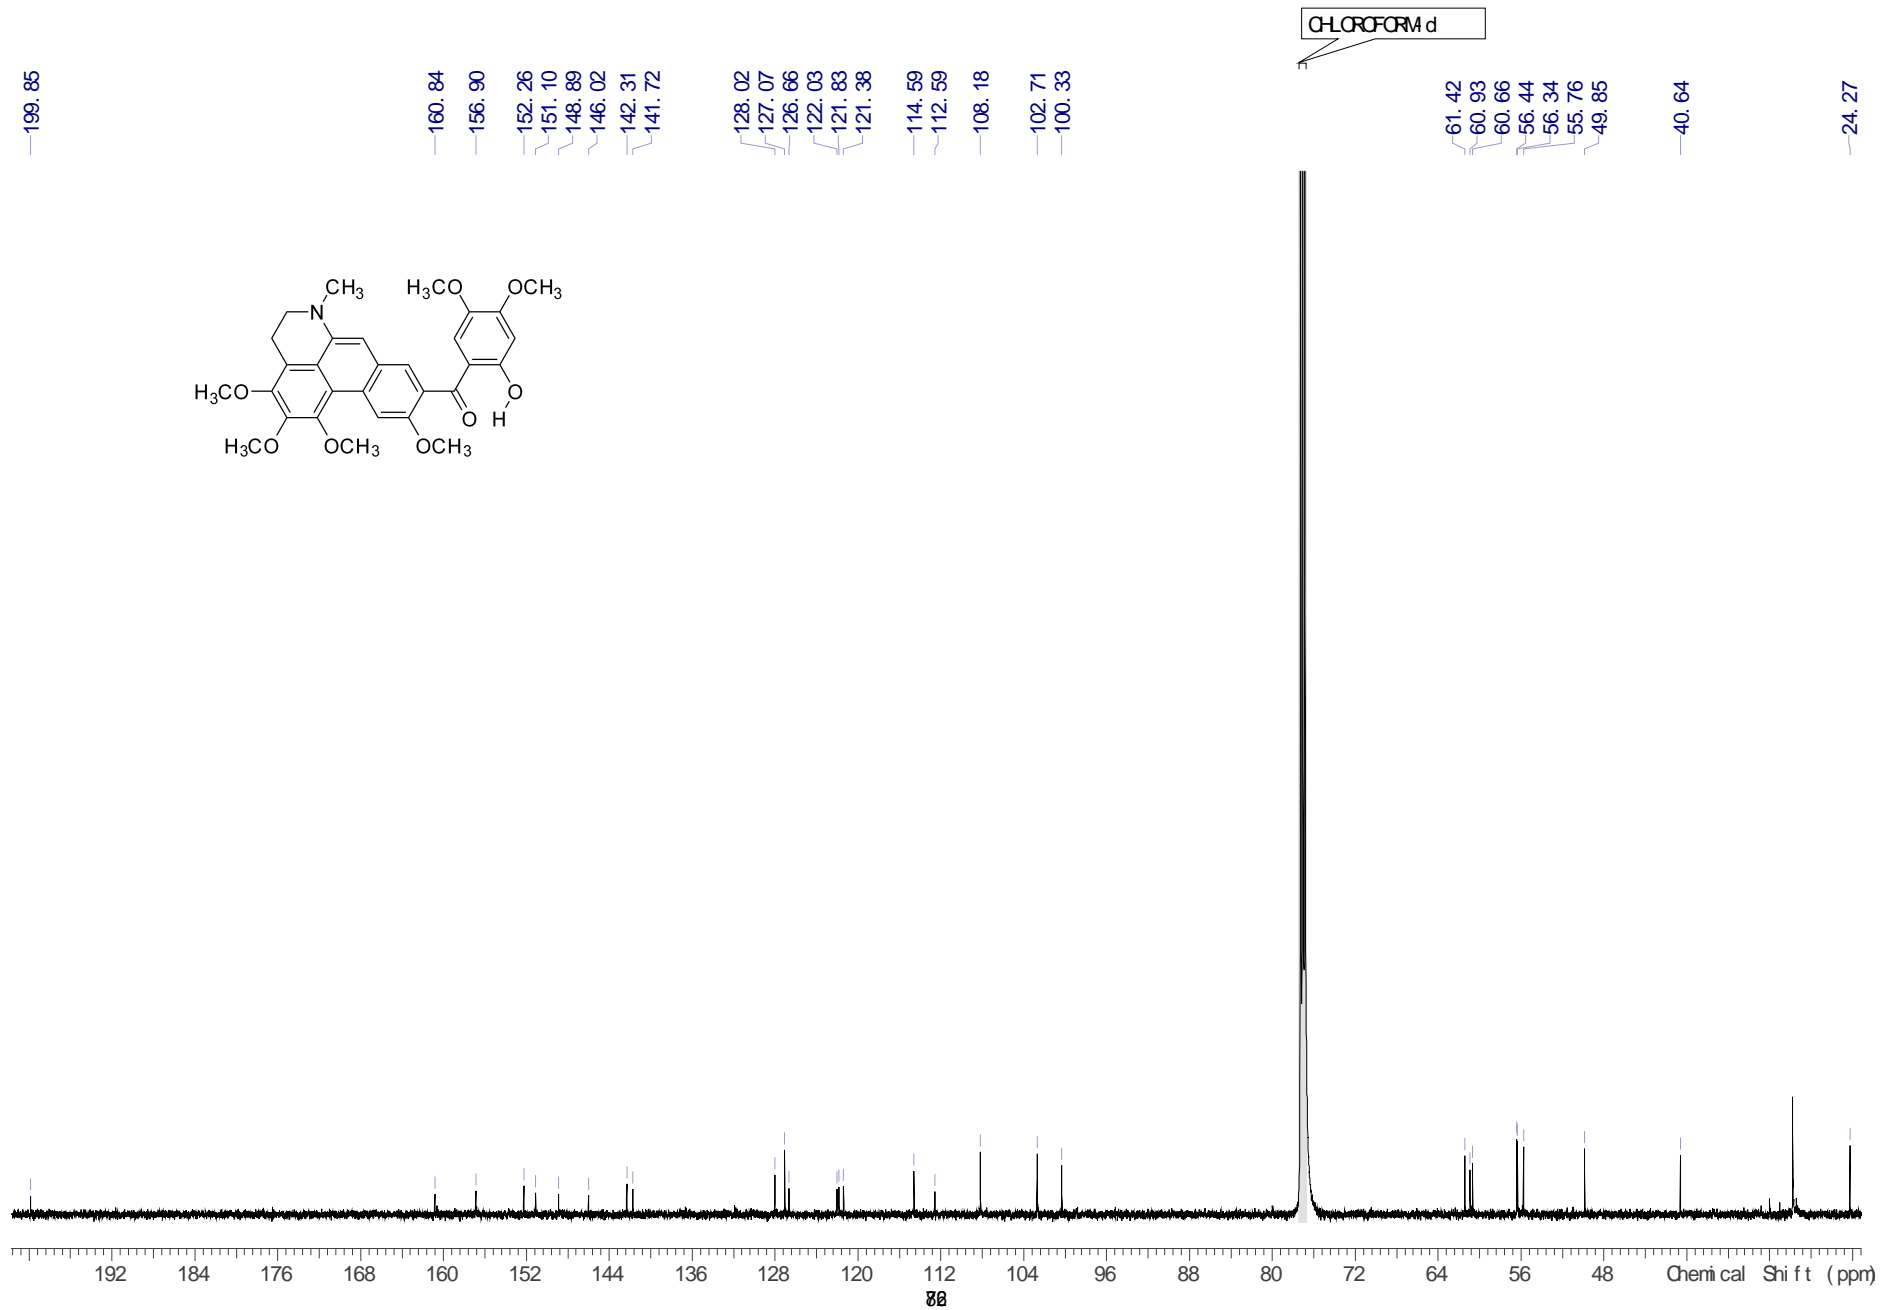

Figure S32-1. DEPT 90 spectrum of thalfoetine D (**4**) in CDCl<sub>3</sub> (150 MHz)

—127.07  
—114.58  
—108.17  
—102.71  
—100.33

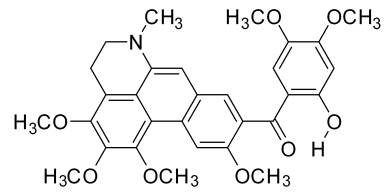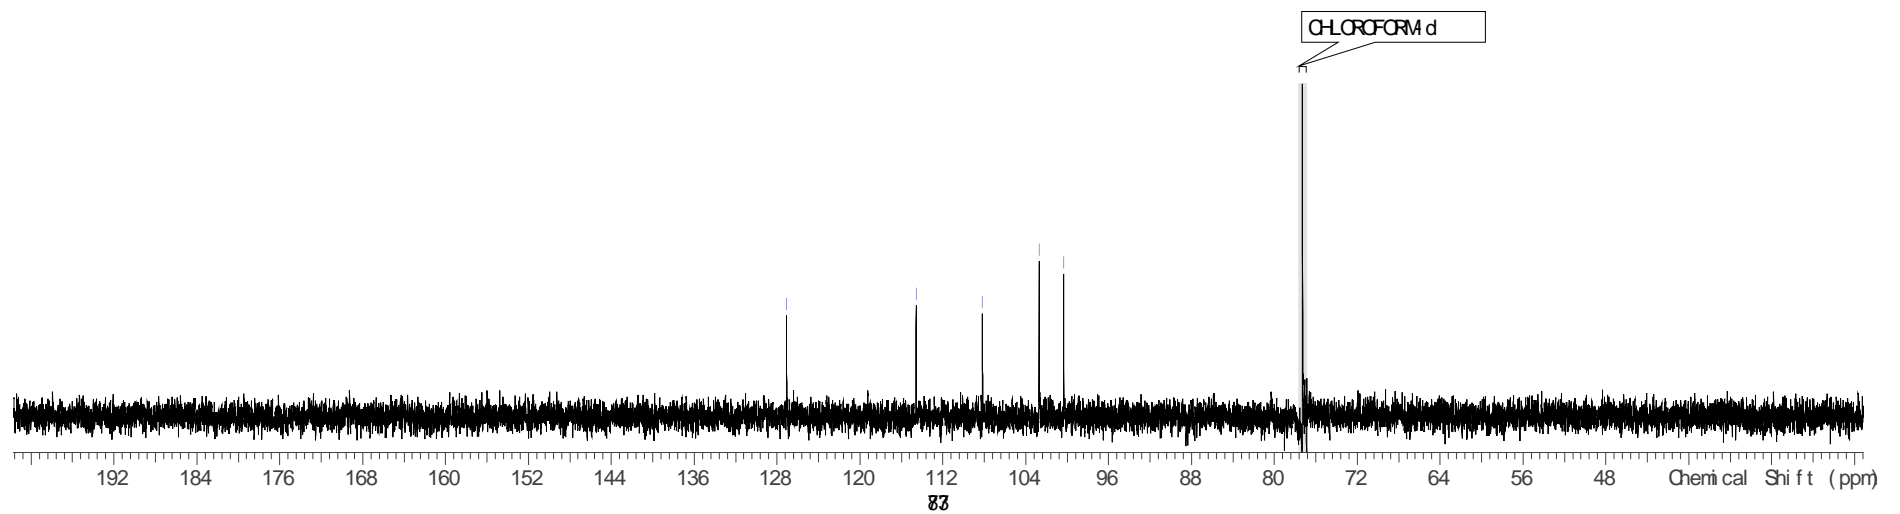

Figure S32-2. DEPT 135 spectrum of thalfoetine D (**4**) in CDCl<sub>3</sub> (150 MHz)

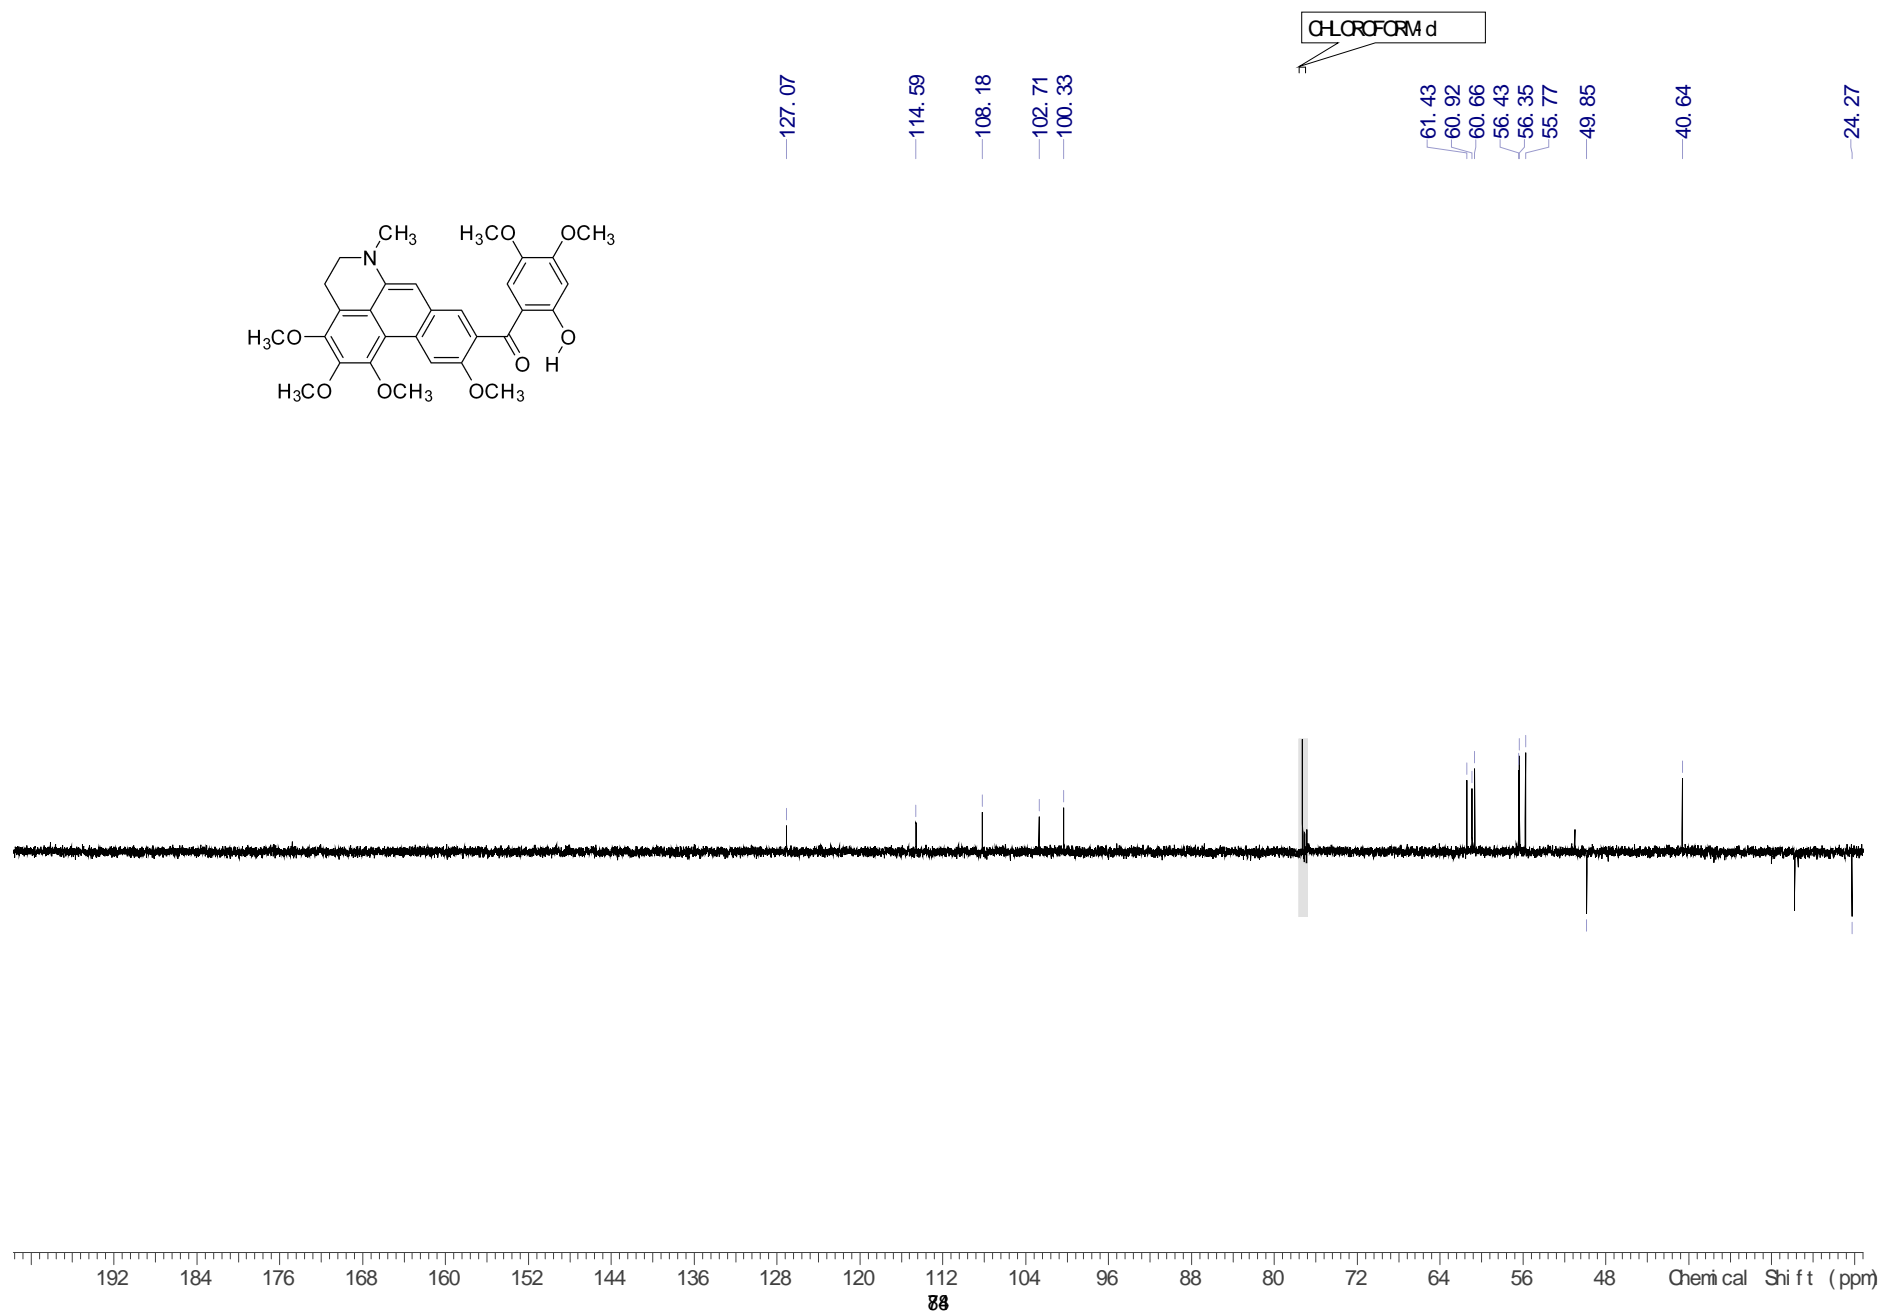

Figure S33. HSQC spectrum of thalfoetine D (**4**) in CDCl<sub>3</sub> (600 MHz)

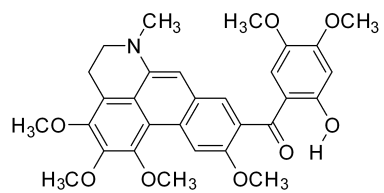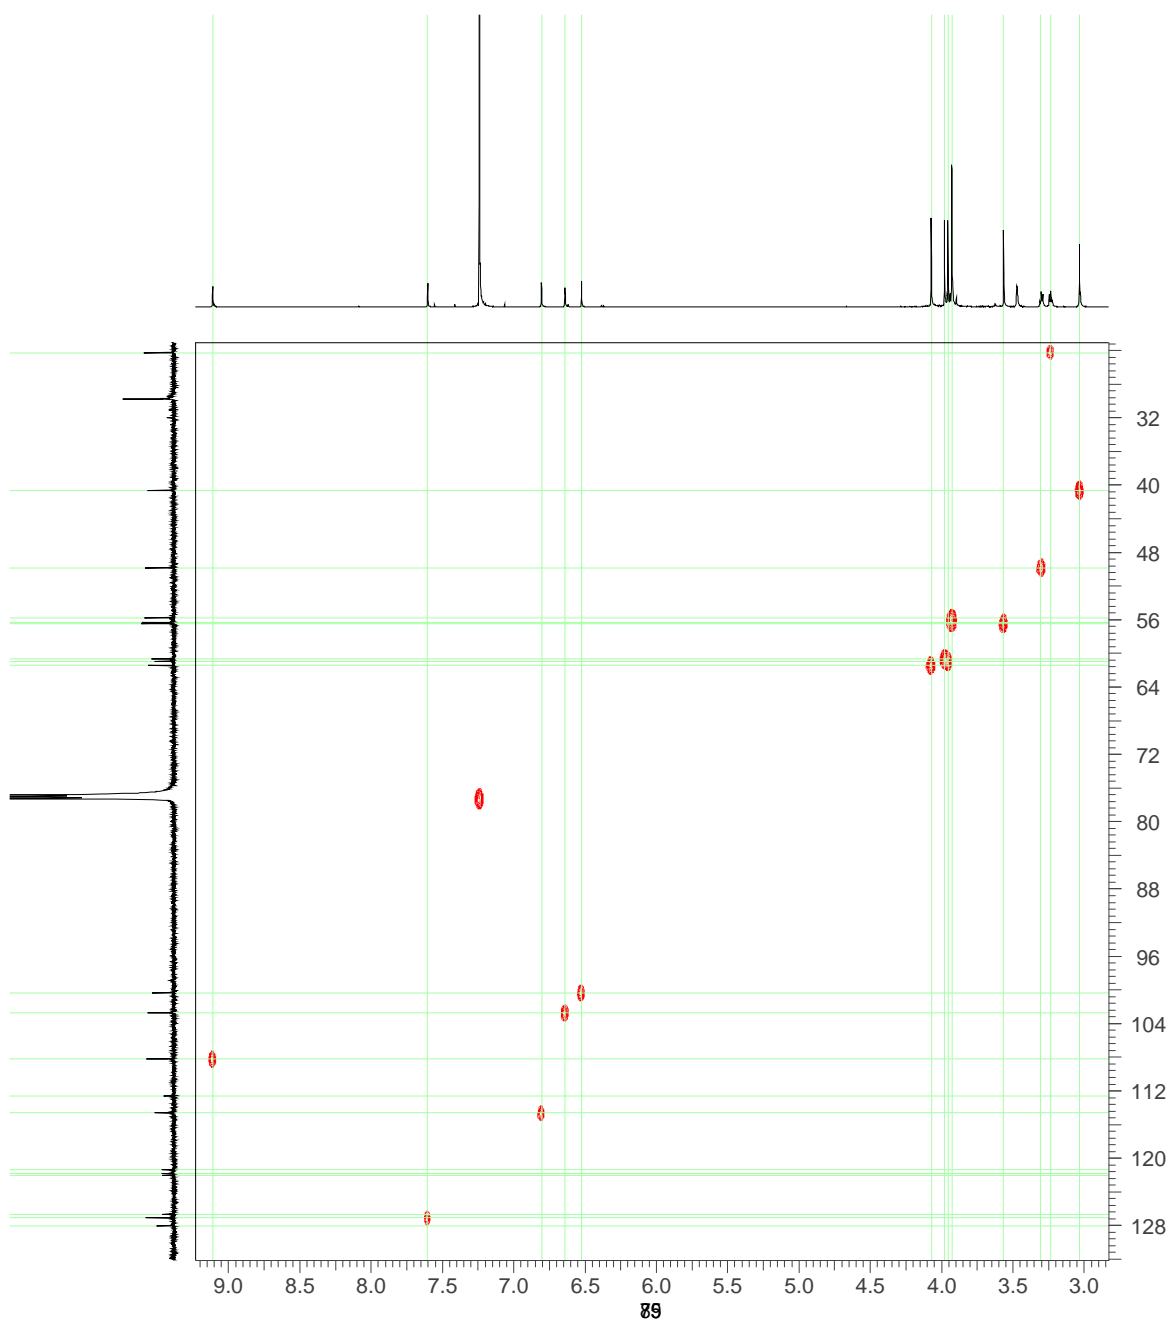

Figure S33-1. The partially enlarged HSQC spectrum of thalfoetine D (4)

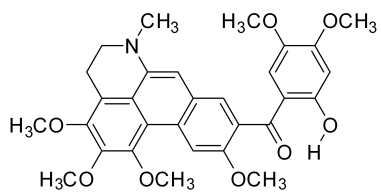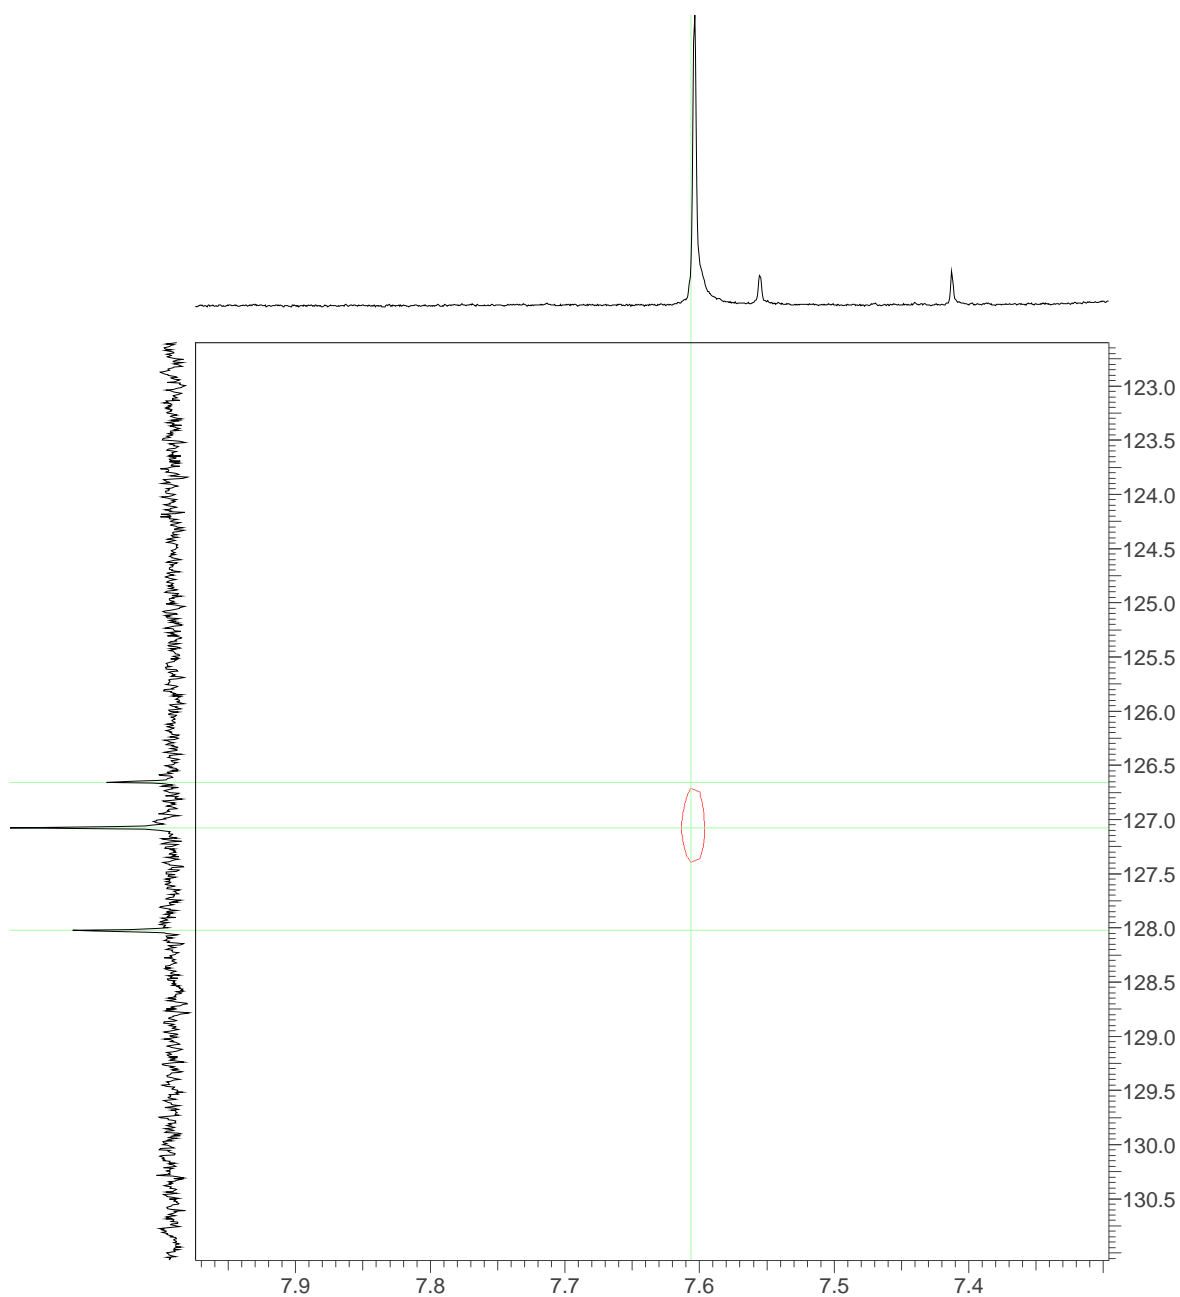

Figure S34. HMBC spectrum of thalfoetine C (**4**) in CDCl<sub>3</sub> (600 MHz)

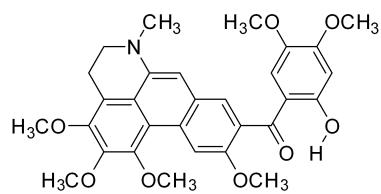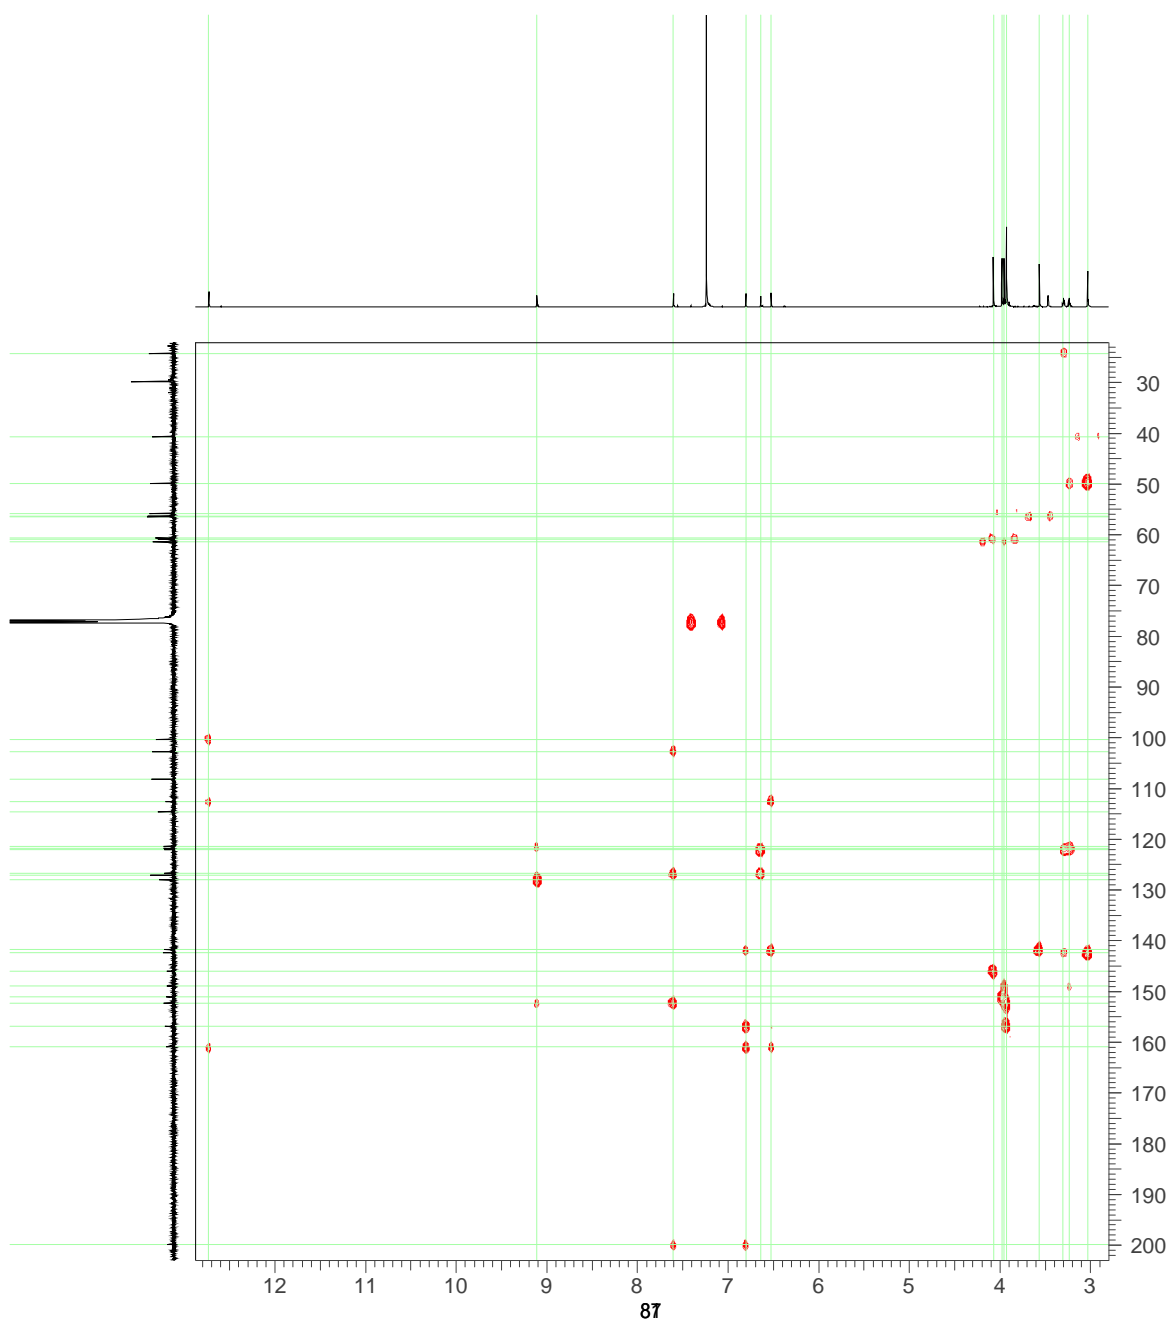

Figure S34-1. The partially enlarged HMBC spectrum of thalfoetine C (**4**)

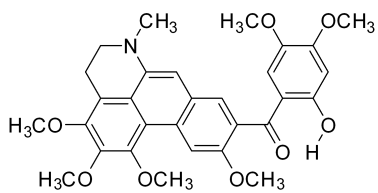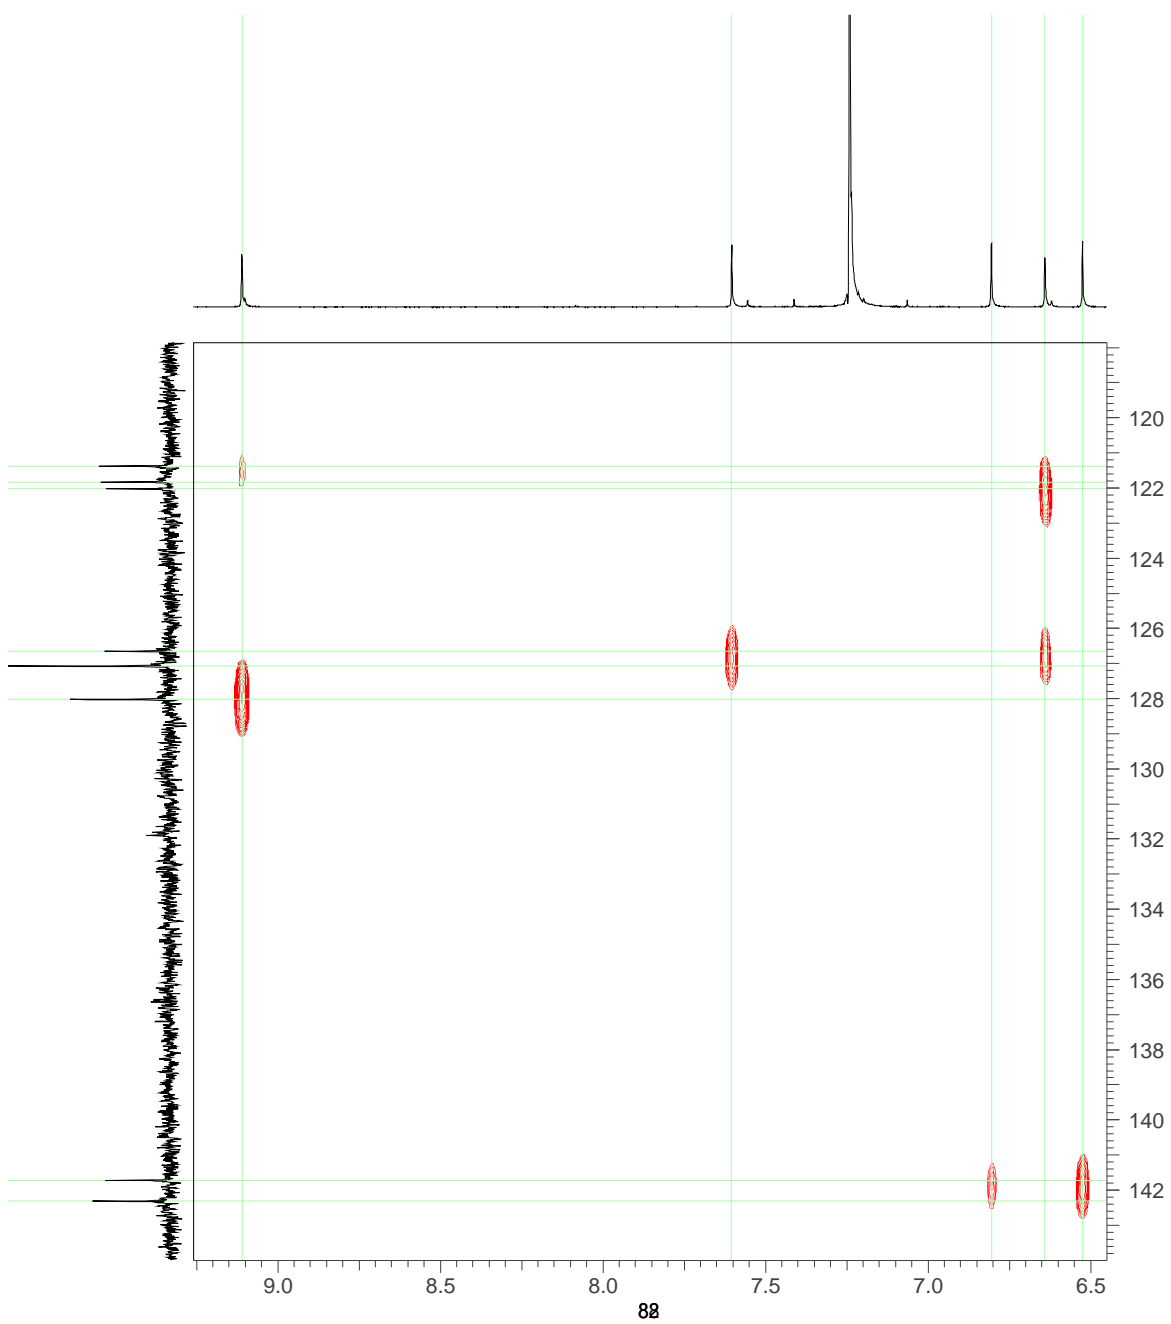



Figure S34-2. The partially enlarged HMBC spectrum of thalfoetine C (4)

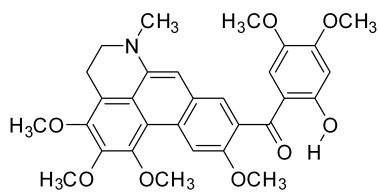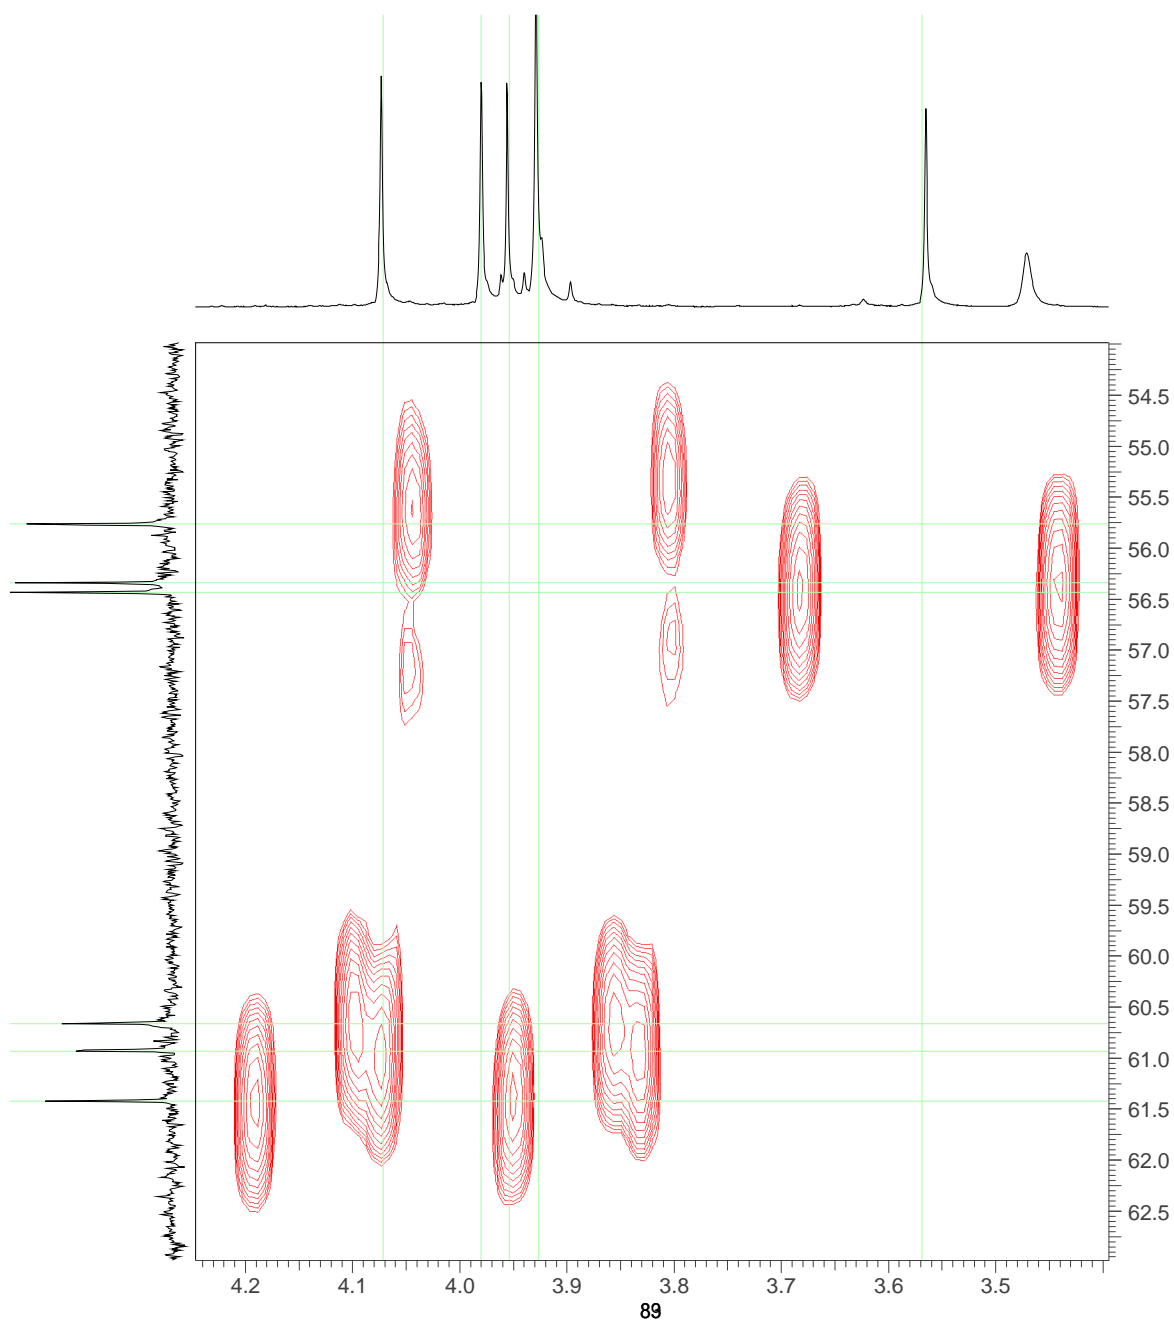

Figure S34-3. The partially enlarged HMBC spectrum of thalfoetine C (4)

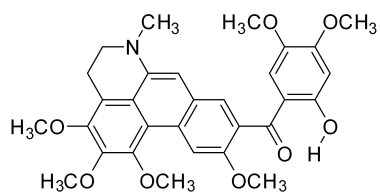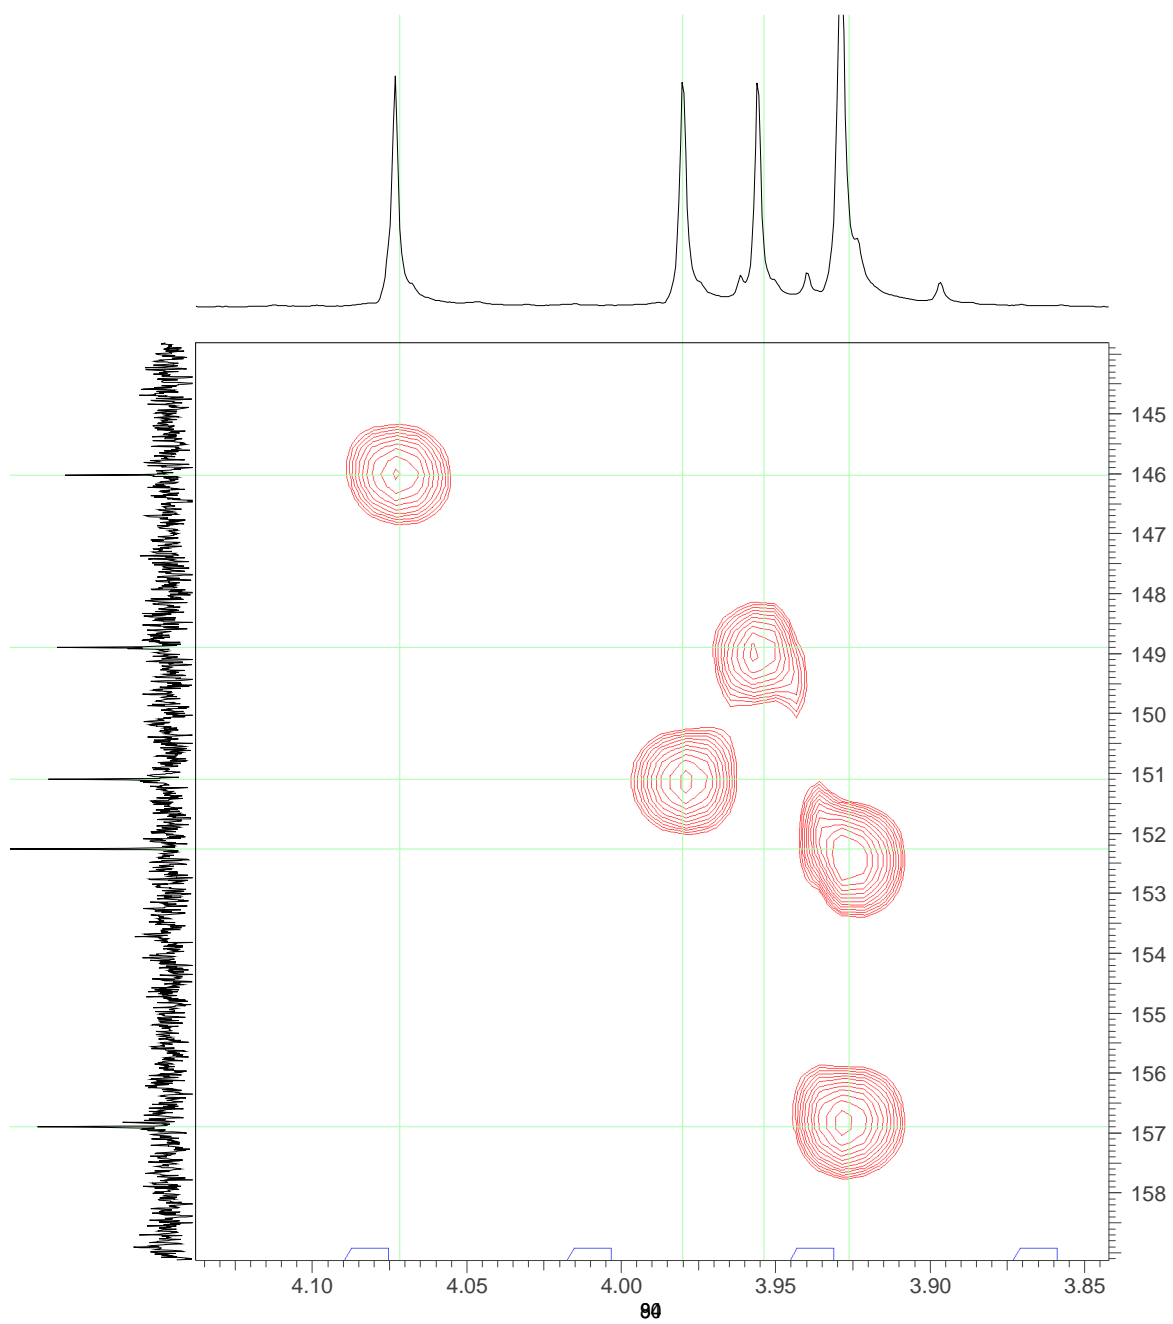

Figure S34-4. The partially enlarged HMBC spectrum of thalfoetine C (4)

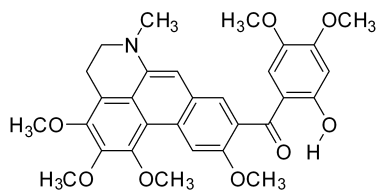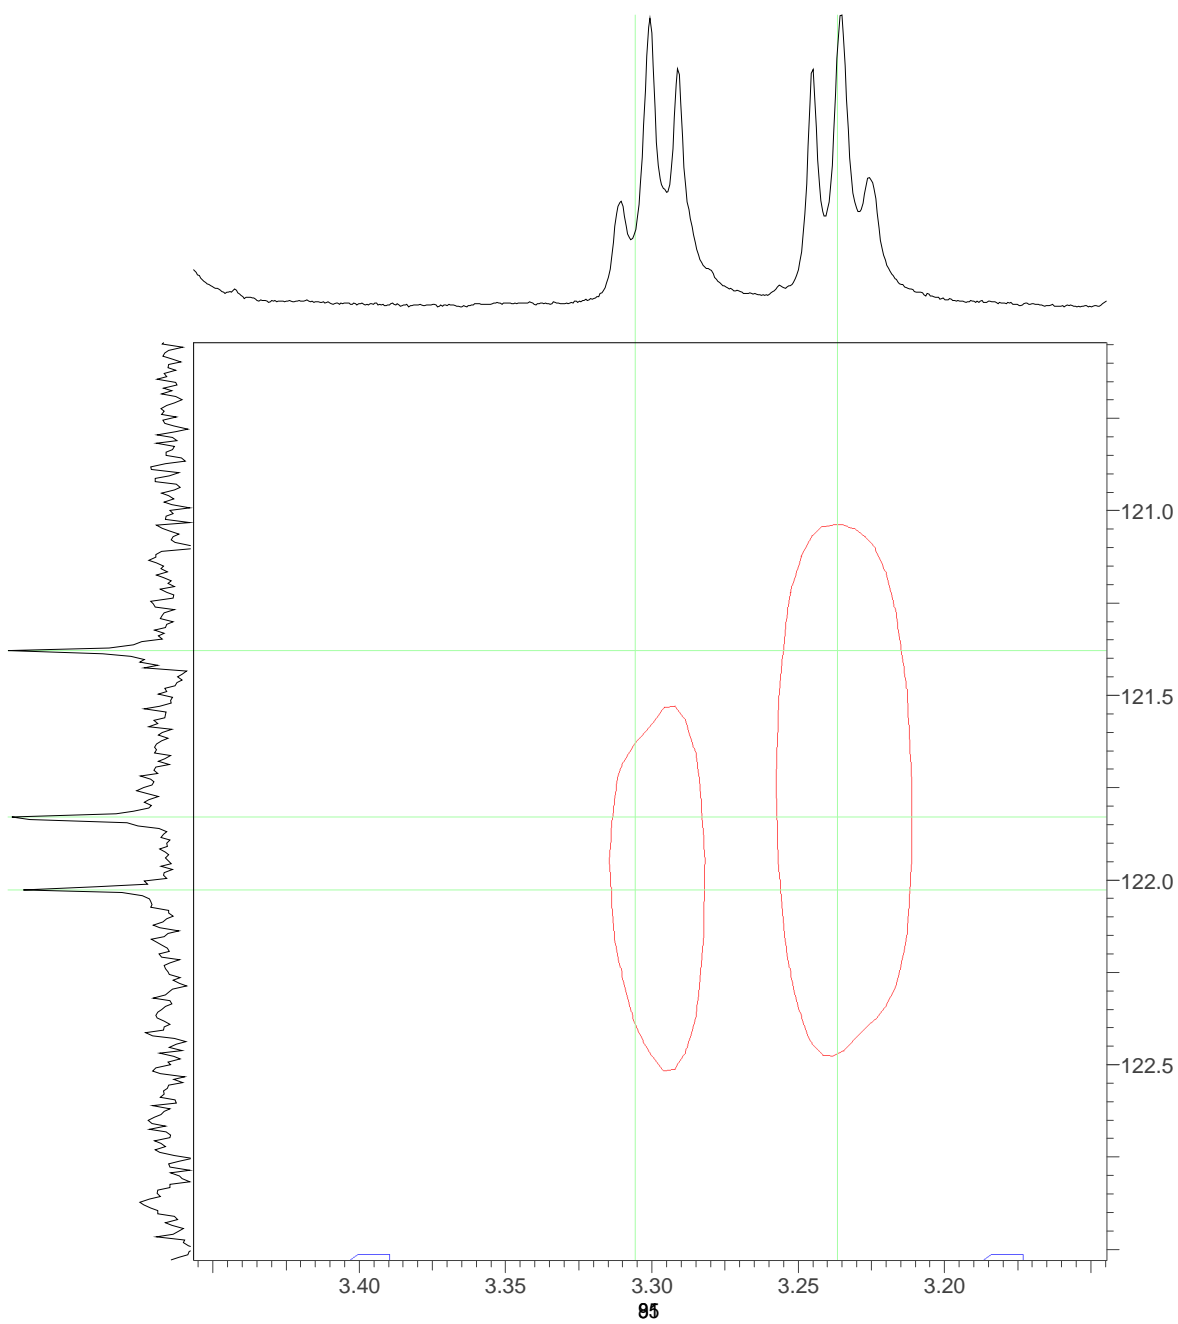

Figure S35. ROESY spectrum of thalfoetine C (**4**) in CDCl<sub>3</sub> (600 MHz)

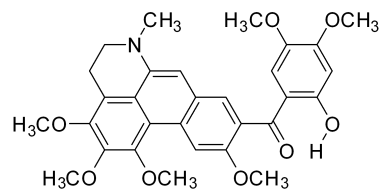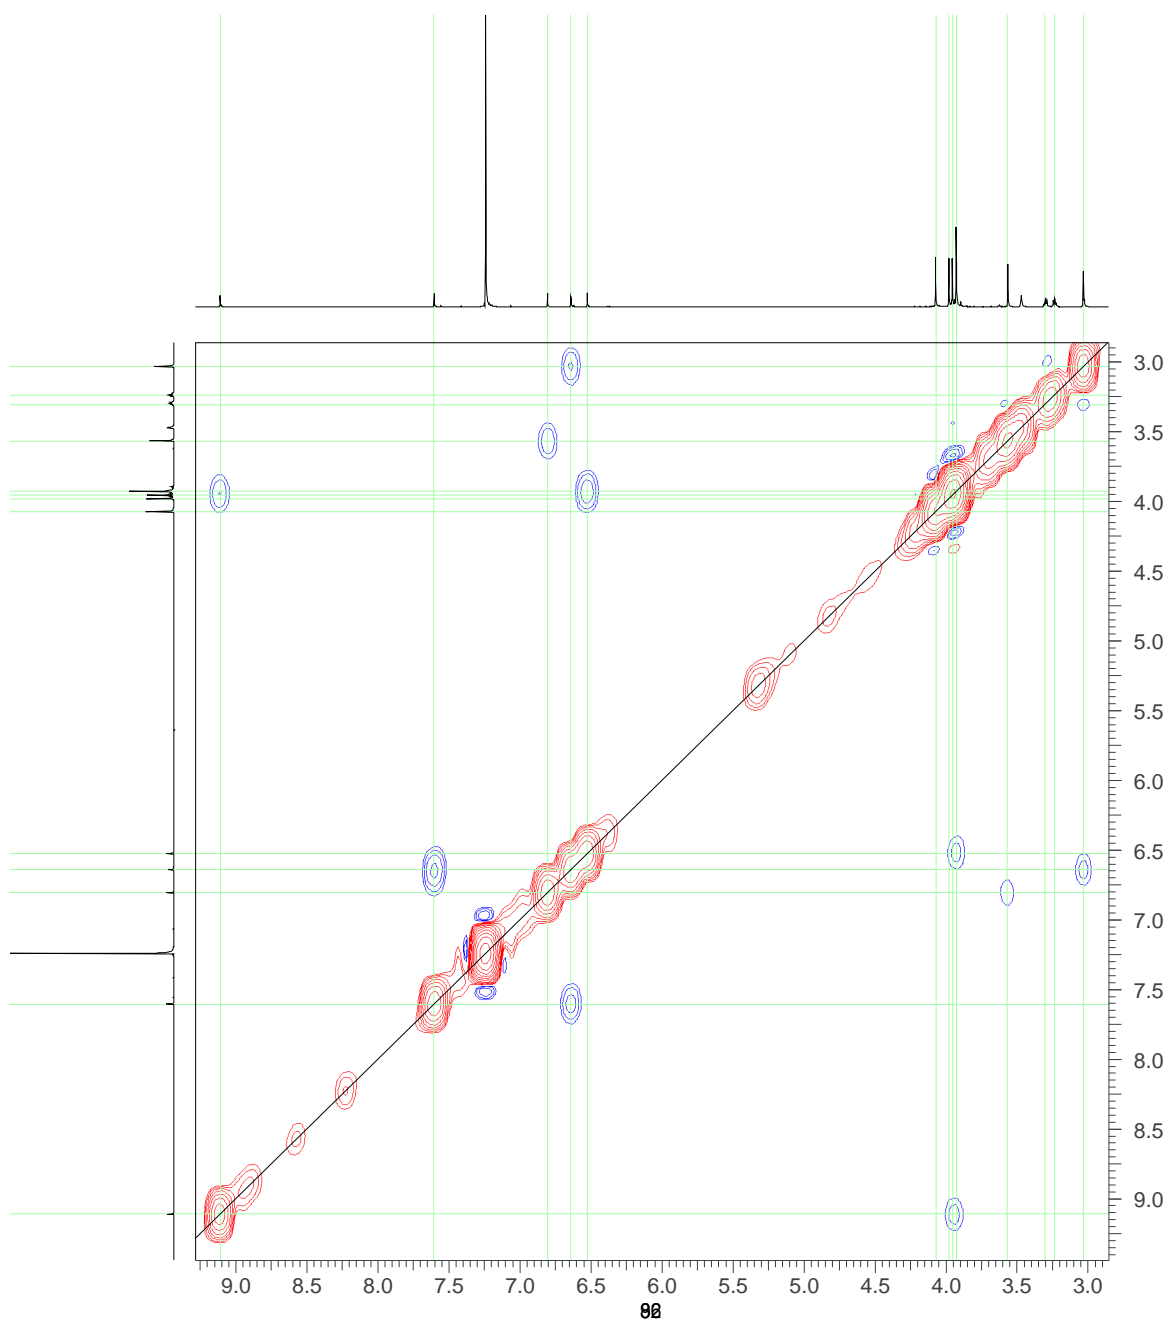

Supplement: c9qo00737g1.pdf [file c9qo00737g1.pdf]
